# Supplementary material
Source: PubMed Central journal article supplement (PMC4809423)
Supplement: NIHMS770527-supplement-Supporting_Information.pdf [file NIHMS770527-supplement-Supporting_Information.pdf]

# **Nickel-Catalyzed Borylation of Benzylic Ammonium Salts: Stereospecific Synthesis of Enantioenriched Benzylic Boronates**

Corey H. Basch, Kelsey M. Cobb, Mary P. Watson\*

Department of Chemistry and Biochemistry, University of Delaware, Newark, DE 19716

mpwatson@udel.edu

## **SUPPORTING INFORMATION**

|                                                                                                                                                   |             |
|---------------------------------------------------------------------------------------------------------------------------------------------------|-------------|
| <b>General Information</b> .....                                                                                                                  | <b>S2</b>   |
| <b>Stereospecific Borylation of Benzylic Ammonium Salts</b> .....                                                                                 | <b>S3</b>   |
| <b>General Procedure A: Borylation of Naphthyl-Substituted Benzylic Ammonium Salts</b> .....                                                      | <b>S3</b>   |
| <b>General Procedure B: Borylation of Non-Naphthyl-Substituted Benzylic Ammonium Salts</b> .....                                                  | <b>S4</b>   |
| <b>General Procedure C: Oxidation of Benzylic Boronates to Benzylic Alcohols for Determination of Enantiomeric Excess (ee)</b> . ....             | <b>S4</b>   |
| <b>Gram-Scale Synthesis of (<i>S</i>)-2-(1-(6-methoxynaphthalen-2-yl)ethyl)-4,4,5,5-tetramethyl-1,3,2-dioxaborolane (2c)</b> .....                | <b>S24</b>  |
| <b>Preparation of Benzyl Ammonium Salts</b> .....                                                                                                 | <b>S24</b>  |
| <b>General Procedure D: Preparation of (<i>S</i>)-<i>N,N,N</i>-trimethyl-1-(naphthalen-1-yl)ethanaminium trifluoromethanesulfonate (1b)</b> ..... | <b>S25</b>  |
| <b>References</b> .....                                                                                                                           | <b>S33</b>  |
| <b>NMR Spectra</b> .....                                                                                                                          | <b>S34</b>  |
| <b>HPLC Spectra</b> .....                                                                                                                         | <b>S128</b> |

## General Information

Reactions were performed in oven-dried vials with Teflon-lined caps or in oven-dried round-bottomed flasks unless otherwise noted. Flasks were fitted with rubber septa, and reactions were conducted under a positive pressure of N<sub>2</sub>. Stainless steel syringes or cannulae were used to transfer air- and moisture-sensitive liquids. Flash chromatography was performed on silica gel 60 (40-63 μm, 60Å) unless otherwise noted. Commercial reagents were purchased from Sigma Aldrich, Acros, Fisher, Strem, TCI, Combi Blocks, Alfa Aesar, or Cambridge Isotopes Laboratories and used as received with the following exceptions: Bis(pinacolato)diboron, bis(neopentyl glycolato)diboron, and bis(hexylene glycolato)diboron were purchased from Sigma Aldrich and immediately placed in a N<sub>2</sub>-atmosphere glovebox for storage. Ni(OAc)<sub>2</sub>·4H<sub>2</sub>O was purchased from Alfa Aesar and donated by Astra Zeneca. Methyl trifluoromethanesulfonate (MeOTf) was purchased from TCI and used directly. 1,3-Bis(cyclohexyl)imidazolium tetrafluoroborate (ICy·HBF<sub>4</sub>) was purchased from Sigma Aldrich and used as received.. THF was dried by passing through drying columns, then degassed by sparging with N<sub>2</sub> and stored over activated 4Å MS in a N<sub>2</sub>-atmosphere glovebox.<sup>1</sup> Commercially available enantioenriched amines were purchased from Alfa Aesar or Sigma Aldrich and used as received. Enantioenriched amines that were not commercially available were obtained through Grignard or hydride additions of Ellman's sulfinimines.<sup>2</sup> Dimethyl benzyl amines were prepared using Eschweiler-Clarke conditions or reductive amination of the corresponding primary benzyl amine with formaldehyde.<sup>3</sup> In some instances oven-dried potassium carbonate was added into CDCl<sub>3</sub> to remove trace amount of acid. Proton nuclear magnetic resonance (<sup>1</sup>H NMR) spectra, carbon nuclear magnetic resonance (<sup>13</sup>C NMR) spectra, fluorine nuclear magnetic resonance spectra (<sup>19</sup>F NMR), and silicon nuclear magnetic resonance spectra (<sup>29</sup>Si NMR) were recorded on both 400 MHz and 600 MHz spectrometers. Boron nuclear magnetic resonance spectra (<sup>11</sup>B NMR) were recorded on a 600 MHz spectrometer. Chemical shifts for protons are reported in parts per million downfield from tetramethylsilane and are referenced to residual protium in the NMR solvent (CHCl<sub>3</sub> = δ 7.26). Chemical shifts for carbon are reported in parts per million downfield from tetramethylsilane and are referenced to the carbon resonances of the solvent (CDCl<sub>3</sub> = δ 77.2). Data are represented as follows: chemical shift, multiplicity

(br = broad, s = singlet, d = doublet, t = triplet, q = quartet, p = pentet, m = multiplet, dd = doublet of doublets, h = heptet), coupling constants in Hertz (Hz), integration. Infrared (IR) spectra were obtained using FTIR spectrophotometers with material loaded onto a KBr plate. The mass spectral data were obtained at the University of Delaware mass spectrometry facility. Optical rotations were measured using a 2.5 mL cell with a 0.1 dm path length. Melting points were taken on a Stuart SMP10 instrument.

## Stereospecific Borylation of Benzylic Ammonium Salts

### General Procedure A: Borylation of Naphthyl-Substituted Benzylic Ammonium Salts

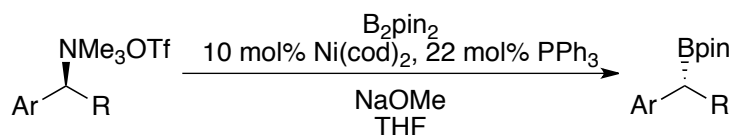

In a N<sub>2</sub>-atmosphere glovebox, Ni(cod)<sub>2</sub> (8.3 mg, 0.030 mmol, 10 mol %), PPh<sub>3</sub> (4.4 mg, 0.066 mmol, 22 mol %), NaOMe (24 mg, 0.45 mmol, 1.5 equiv), B<sub>2</sub>pin<sub>2</sub> (114 mg, 0.45 mmol, 1.5 equiv), and ammonium salt **1** (0.30 mmol, 1.0 equiv) were weighed into a 1-dram vial equipped with a magnetic stir bar. THF (1.5 mL, 0.2 M) was added, and the vial was capped with a Teflon-lined cap and removed from the glovebox. The mixture was stirred at room temperature for 24 h. The reaction mixture was then diluted with Et<sub>2</sub>O (2.5 mL) and quickly filtered through a short plug of Celite<sup>®</sup>, which was then rinsed with Et<sub>2</sub>O (~ 10 mL). The filtrate was concentrated and purified by silica gel chromatography to give the benzylic boronate product. The benzylic boronate was then converted to the corresponding benzylic alcohol via oxidation (see General Procedure C below) to determine the enantiomeric excess (ee).

## General Procedure B: Borylation of Non-Naphthyl-Substituted Benzylic Ammonium Salts

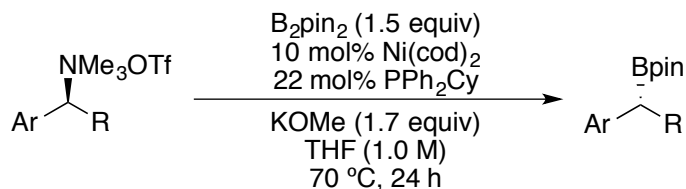

In a  $\text{N}_2$ -atmosphere glovebox,  $\text{Ni}(\text{cod})_2$  (8.3 mg, 0.030 mmol, 10 mol %),  $\text{PPh}_2\text{Cy}$  (18 mg, 0.066 mmol, 22 mol %),  $\text{KOMe}$  (38 mg, 0.45 mmol, 1.7 equiv),  $\text{B}_2\text{pin}_2$  (114 mg, 0.45 mmol, 1.5 equiv), and ammonium salt **1** (0.30 mmol, 1.0 equiv) were weighed into a 1-dram vial equipped with a magnetic stir bar. THF (0.3 mL, 1.0 M) was added and the vial was capped with a Teflon-lined cap and removed from the glovebox. The mixture was stirred at 70 °C for 24 h. The reaction mixture was then diluted with  $\text{Et}_2\text{O}$  (2.5 mL) and quickly filtered through a plug of Celite<sup>®</sup>, which was then rinsed with  $\text{Et}_2\text{O}$  (~ 10 mL). The filtrate was concentrated and then purified by silica gel chromatography to give the benzylic boronate product. The benzylic boronate was then converted to the corresponding benzylic alcohol via oxidation (see General Procedure C below) to determine the enantiomeric excess (ee).

## General Procedure C: Oxidation of Benzylic Boronates to Benzylic Alcohols for Determination of Enantiomeric Excess (ee).

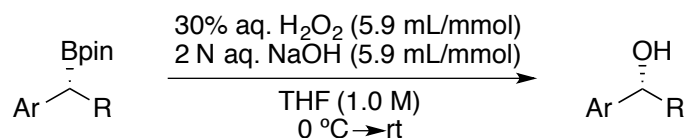

A solution of the benzylic boronate **2** (1.0 equiv) and  $\text{Et}_2\text{O}$  (0.017 M) was cooled to 0 °C. Aqueous  $\text{NaOH}$  (2 N, 5.9 mL/mmol of **2**) was added, followed by aq.  $\text{H}_2\text{O}_2$  (30%, 5.9 mL/mmol of **2**). The mixture was stirred and allowed to warm slowly to room temperature overnight. The reaction mixture was diluted with  $\text{H}_2\text{O}$  and  $\text{Et}_2\text{O}$ , and the layers were separated. The aqueous layer was extracted with  $\text{Et}_2\text{O}$  (3 x 20 mL). The combined organic layers were dried ( $\text{MgSO}_4$ ), filtered, and concentrated. The crude mixture was purified via silica gel chromatography to afford benzylic alcohol **3** for ee

determination. For duplicate experiments, alcohol **3** was isolated once via column chromatography (to verify high yield in the oxidation) and once via preparatory thin-layer chromatography under the same mobile-phase conditions.

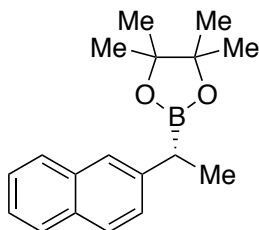

**(*R*)-4,4,5,5-tetramethyl-2-(1-(naphthalen-2-yl)ethyl)-1,3,2-dioxaborolane (**2a**).**

Prepared via General Procedure A using ammonium salt **1a** (amine purchased in >99% ee). The crude mixture was purified by silica gel chromatography (5% EtOAc/hexanes) to give **2a** (run 1: 69 mg, 82%; run 2: 79%) as a white solid:  $^1\text{H}$  NMR (400 MHz,  $\text{CDCl}_3$ )  $\delta$  7.83 – 7.75 (m, 3H), 7.67 (s, 1H), 7.48 – 7.37 (m, 3H), 2.64 (q,  $J = 7.4$  Hz, 1H), 1.46 (d,  $J = 7.6$  Hz, 3H), 1.23 (s, 6H), 1.22 (s, 6H);  $^{13}\text{C}$  NMR (101 MHz,  $\text{CDCl}_3$ )  $\delta$  142.7, 134.0, 131.8, 127.8, 127.7, 127.6, 127.4, 125.8, 125.4, 124.9, 83.5, 24.8, 24.8, 17.0.<sup>4</sup> The spectral data match that previously reported in the literature.<sup>5</sup>

Boronate **2a** was oxidized to alcohol **3a** via General Procedure C. The enantiomeric excess was determined to be 99% (run 1: 99% ee; run 2: 99% ee) by chiral HPLC analysis. See alcohol **3a** below.

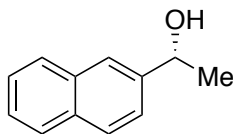

**(*R*)-1-(naphthalen-2-yl)ethanol (**3a**).** Prepared via General Procedure C using benzylic boronate **2a**. The crude mixture was purified by silica gel chromatography (20% EtOAc/hexanes) to give **3a** (run 1 (66 mg of **2a**): 38 mg, 95%) as a white solid. The enantiomeric excess was determined to be 99% (run 1: 99% ee; run 2: 99% ee) by chiral

HPLC analysis (CHIRAPAK IA, 1.0 mL/min, 1% *i*-PrOH/hexanes,  $\lambda=254$  nm);  $t_R$ (major) = 43.70 min,  $t_R$ (minor) = 45.74 min);  $^1\text{H}$  NMR (400 MHz,  $\text{CDCl}_3$ )  $\delta$  7.89 – 7.79 (m, 4H), 7.56 – 7.42 (m, 3H), 5.06 (q,  $J = 6.2$  Hz, 1H), 2.07 (s, 1H), 1.58 (d,  $J = 6.4$  Hz, 3H);  $^{13}\text{C}$  NMR (101 MHz,  $\text{CDCl}_3$ )  $\delta$  143.3, 133.4, 133.0, 128.5, 128.1, 127.8, 126.3, 126.0, 123.97, 123.95, 70.7, 25.3. The spectral data match that previously reported in the literature.<sup>6</sup>

The absolute configuration of alcohol **3a** was determined to be *R* by comparison of its HPLC trace to that of commercially available, enantioenriched **3a**.

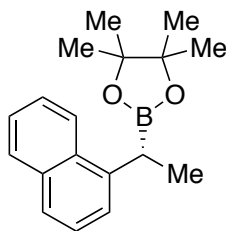

**(*R*)-4,4,5,5-tetramethyl-2-(1-(naphthalen-1-yl)ethyl)-1,3,2-dioxaborolane ((*R*)-**2b**)**. Prepared via General Procedure A using ammonium salt **1b** (amine purchased in >99% ee). The crude mixture was purified by silica gel chromatography (5% EtOAc/hexanes) to give **2b** (run 1: 47 mg, 56%; run 2: 47 mg, 56%) as a white solid:  $^1\text{H}$  NMR (400 MHz,  $\text{CDCl}_3$ )  $\delta$  8.13 (d,  $J = 8.2$  Hz, 1H), 7.88 – 7.83 (m, 1H), 7.69 (d,  $J = 7.5$  Hz, 1H), 7.53 – 7.39 (m, 4H), 3.14 (q,  $J = 7.4$  Hz, 1H), 1.52 (d,  $J = 7.5$  Hz, 3H), 1.23 (s, 6H), 1.22 (s, 6H);  $^{13}\text{C}$  NMR (101 MHz,  $\text{CDCl}_3$ )  $\delta$  141.5, 134.0, 132.1, 128.9, 126.0, 125.5, 125.4, 124.4, 124.2, 83.6, 24.8, 24.7, 16.6.<sup>4</sup> The spectral data matches that previously reported in the literature.<sup>5</sup>

Boronate **2b** was oxidized to alcohol **3b** via General Procedure C. The enantiomeric excess was determined to be 92% (run 1: 92%, run 2: 91%) by chiral HPLC analysis. See alcohol **3b** below.

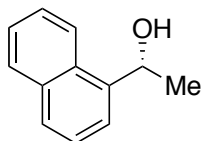

**(R)-1-(naphthalen-1-yl)ethanol (3b).** Prepared via General Procedure C using benzylic boronate **2b**. The crude mixture was purified by silica gel chromatography (20% EtOAc/hexanes) to give **3b** (run 1 (47 mg of **2b**): 21 mg, 72%) as a colorless oil. The enantiomeric excess was determined to be 92% (run 1: 92% ee; run 2: 91% ee) by chiral HPLC analysis (CHIRAPAK IC, 1.0 mL/min, 2% *i*-PrOH/hexanes,  $\lambda=254$  nm);  $t_R(\text{major}) = 23.87$  min,  $t_R(\text{minor}) = 18.43$  min):  $^1\text{H}$  NMR (400 MHz,  $\text{CDCl}_3$ )  $\delta$  8.12 (d,  $J = 8.2$  Hz, 1H), 7.89 (d,  $J = 7.6$  Hz, 1H), 7.79 (d,  $J = 8.2$  Hz, 1H), 7.69 (d,  $J = 7.1$  Hz, 1H), 7.57 – 7.45 (m, 3H), 5.69 (q,  $J = 6.3$  Hz, 1H), 1.96 (s, 1H), 1.68 (d,  $J = 6.5$  Hz, 3H);  $^{13}\text{C}$  NMR (101 MHz,  $\text{CDCl}_3$ )  $\delta$  141.5, 133.9, 130.4, 129.1, 128.1, 126.2, 125.73, 125.70, 123.3, 122.1, 67.3, 24.5. The spectral data of this compound match that previously reported in the literature.<sup>6</sup>

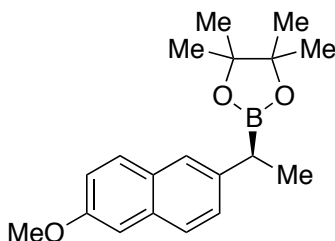

**(S)-2-(1-(6-methoxynaphthalen-2-yl)ethyl)-4,4,5,5-tetramethyl-1,3,2-dioxaborolane (2c).** Prepared via General Procedure A using ammonium salt **1c** (amine prepared in  $\geq 95\%$  ee). The crude mixture was purified by silica gel chromatography (5% EtOAc/hexanes) to give **2c** (run 1: 78 mg, 83%; run 2: 78 mg, 83%) as a white solid:  $^1\text{H}$  NMR (400 MHz,  $\text{CDCl}_3$ )  $\delta$  7.68 (t,  $J = 8.1$  Hz, 2H), 7.60 (s, 1H), 7.38 (dd,  $J = 8.4, 1.4$  Hz, 1H), 7.12 (d,  $J = 8.1$  Hz, 2H), 3.91 (s, 3H), 2.60 (q,  $J = 7.5$  Hz, 1H), 1.44 (d,  $J = 7.5$  Hz, 3H), 1.23 (s, 6H), 1.22 (s, 6H);  $^{13}\text{C}$  NMR (101 MHz,  $\text{CDCl}_3$ )  $\delta$  157.0, 140.3, 132.7, 129.5, 129.1, 127.8, 126.7, 125.3, 118.5, 105.7, 83.5, 55.4, 24.8, 24.7, 17.1.<sup>4</sup> The spectral data match that previously reported in the literature.<sup>7</sup>

Boronate **2c** was oxidized to alcohol **3c** via General Procedure C. The enantiomeric excess was determined to be 99% (run 1: 98% ee; run 2: 99% ee) by chiral HPLC analysis. See alcohol **3c** below.

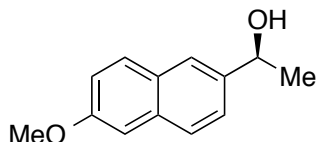

**(S)-1-(6-methoxynaphthalen-2-yl)ethanol (3c)**. Prepared via General Procedure C using benzylic boronate **2c**. The crude mixture was purified by silica gel chromatography (20% EtOAc/hexanes) to give **3c** (run 1 (67 mg of **2c**): 31 mg, 72%) as a white solid; the enantiomeric excess was determined to be 99% (run 1: 98% ee; run 2: 99% ee) by chiral HPLC analysis (CHIRAPAK IB, 1.0 mL/min, 3% *i*-PrOH/hexanes,  $\lambda=254$  nm);  $t_R$ (major) = 19.99 min,  $t_R$ (minor) = 25.84 min):  $^1\text{H}$  NMR (600 MHz,  $\text{CDCl}_3$ )  $\delta$  7.75 – 7.69 (m, 3H), 7.47 (d,  $J = 8.5$  Hz, 1H), 7.18 – 7.11 (m, 2H), 5.02 (q,  $J = 6.5$  Hz, 1H), 3.92 (s, 3H), 2.03 (s, 1H), 1.57 (d,  $J = 6.5$  Hz, 3H);  $^{13}\text{C}$  NMR (151 MHz,  $\text{CDCl}_3$ )  $\delta$  157.8, 141.1, 134.2, 129.6, 128.9, 127.3, 124.5, 123.9, 119.1, 105.9, 70.6, 55.5, 25.2. The spectral data match that previously reported in the literature.<sup>8</sup>

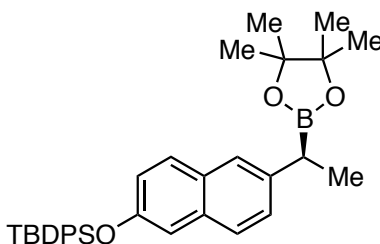

**(S)-tert-butylidiphenyl((6-(1-(4,4,5,5-tetramethyl-1,3,2-dioxaborolan-2-yl)ethyl)naphthalen-2-yl)oxy)silane (2d)**. Prepared via General Procedure A using ammonium salt **1d** (amine prepared in  $\geq 95\%$  ee). The crude mixture was purified by silica gel chromatography (5% EtOAc/hexanes) to give **2d** (76 mg, 47%) as a white solid (mp 84–86 °C):  $^1\text{H}$  NMR (400 MHz,  $\text{CDCl}_3$ )  $\delta$  7.85 – 7.78 (m, 4H), 7.62 – 7.53 (m, 2H),



7.49 – 7.37 (m, 7H), 7.29 (dd,  $J = 8.5, 1.5$  Hz, 1H), 7.10 – 7.03 (m, 2H), 2.57 (q,  $J = 7.4$  Hz, 1H), 1.42 (d,  $J = 7.5$  Hz, 3H), 1.25 (s, 6H), 1.23 (s, 6H), 1.18 (s, 9H);  $^{13}\text{C}$  NMR (101 MHz,  $\text{CDCl}_3$ )  $\delta$  152.8, 140.4, 135.7, 133.2, 132.7, 130.0, 129.6, 128.8, 128.0, 127.6, 126.8, 125.2, 121.5, 114.5, 83.5, 26.8, 24.82, 24.79, 19.7, 17.2;<sup>4</sup>  $^{11}\text{B}$  NMR (193 MHz,  $\text{CDCl}_3$ )  $\delta$  33.6;  $^{29}\text{Si}$  NMR (79 MHz,  $\text{CDCl}_3$ )  $\delta$  -6.4; FTIR (neat) 2960, 2858, 1603, 1500, 1352, 1143, 975, 701  $\text{cm}^{-1}$ ; HRMS (LIFDI) calculated for  $\text{C}_{34}\text{H}_{41}\text{BO}_3\text{Si}$ : 536.2887, found: 536.2894.

Boronate **2d** was oxidized to alcohol **3d** via General Procedure C. The enantiomeric excess was determined to be 92% by chiral HPLC analysis. See alcohol **3d** below.

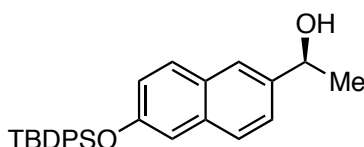

**(S)-1-(6-((tert-butyldiphenylsilyloxy)naphthalen-2-yl)ethanol (3d)**. Prepared via General Procedure C using benzylic boronate **2d**. The crude mixture was purified by silica gel chromatography (20% EtOAc/hexanes) to give **3d** (run 1 (71 mg of **2d**): 54 mg, 95%) as a colorless semi-solid. The enantiomeric excess was determined to be 92% by chiral HPLC analysis (CHIRALPAK IA, 1.0 mL/min, 1% *i*-PrOH/hexanes,  $\lambda=254$  nm);  $t_{\text{R}}(\text{major}) = 35.70$  min,  $t_{\text{R}}(\text{minor}) = 33.76$  min.  $[\alpha]_{\text{D}}^{24} = -20.2^\circ$  (c 2.2,  $\text{CHCl}_3$ ):  $^1\text{H}$  NMR (400 MHz,  $\text{CDCl}_3$ )  $\delta$  7.83 – 7.75 (m, 4H), 7.67 (s, 1H), 7.63 – 7.59 (m, 1H), 7.50 (d,  $J = 8.5$  Hz, 1H), 7.47 – 7.34 (m, 7H), 7.12 – 7.05 (m, 2H), 4.98 (q,  $J = 6.4$  Hz, 1H), 1.99 (bs, 1H), 1.54 (d,  $J = 6.5$  Hz, 3H), 1.16 (s, 9H);  $^{13}\text{C}$  NMR (101 MHz,  $\text{CDCl}_3$ )  $\delta$  153.6, 141.1, 135.7, 134.0, 133.0, 130.1, 129.3, 128.9, 128.0, 127.3, 124.2, 123.7, 122.0, 114.7, 70.6, 26.7, 25.2, 19.7;  $^{29}\text{Si}$  NMR (119 MHz,  $\text{CDCl}_3$ )  $\delta$  -5.9; FTIR (neat) 3347 (broad), 3051, 2931, 2858, 1606, 1482, 1263, 1175, 114, 76, 701, 504  $\text{cm}^{-1}$ ; HRMS (CI+) calculated for  $\text{C}_{28}\text{H}_{30}\text{BO}_2\text{Si}$ : 427.2093, found: 427.2090.

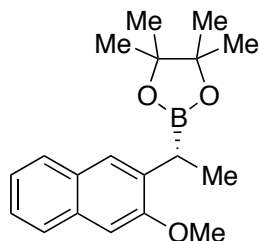

**(R)-2-(1-(3-methoxynaphthalen-2-yl)ethyl)-4,4,5,5-tetramethyl-1,3,2-dioxaborolane (2e).** Prepared via General Procedure A using ammonium salt **1e** (amine prepared in  $\geq 95\%$  ee). The crude mixture was purified by silica gel chromatography (5% EtOAc/hexanes) to give **2e** (46 mg, 49%) as an opaque semi-solid:  $^1\text{H}$  NMR (400 MHz,  $\text{CDCl}_3$ )  $\delta$  7.77 – 7.69 (m, 2H), 7.60 (s, 1H), 7.38 (ddd,  $J = 8.1, 6.8, 1.4$  Hz, 1H), 7.31 (ddd,  $J = 8.1, 6.9, 1.3$  Hz, 1H), 7.08 (s, 1H), 3.93 (s, 3H), 2.63 (q,  $J = 7.5$  Hz, 1H), 1.43 (d,  $J = 7.5$  Hz, 3H), 1.26 (s, 12H);  $^{13}\text{C}$  NMR (101 MHz,  $\text{CDCl}_3$ )  $\delta$  156.2, 135.7, 133.1, 129.4, 127.3, 126.5, 126.3, 125.3, 123.5, 104.4, 83.2, 55.1, 24.80, 24.77, 14.8; $^4$   $^{11}\text{B}$  NMR (193 MHz,  $\text{CDCl}_3$ )  $\delta$  33.6; FTIR (neat) 2976, 1472, 1388, 1251, 1144, 847, 746  $\text{cm}^{-1}$ ; HRMS (LIFDI) calculated for  $\text{C}_{19}\text{H}_{25}\text{BO}_3$ : 312.1897, found: 312.1884.

Boronate **2e** was oxidized to alcohol **3e** via General Procedure C. The enantiomeric excess was determined to be 95% by chiral HPLC analysis. See alcohol **3e** below.

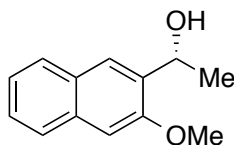

**(R)-1-(3-methoxynaphthalen-2-yl)ethanol (3e).** Prepared via General Procedure C using benzylic boronate **2e**. The crude mixture was purified by silica gel chromatography (20% EtOAc/hexanes) to give **3e** (run 1 (46 mg of **2e**): 25 mg, 83%) as a clear oil. The enantiomeric excess was determined to be 95% (CHIRALPAK IB, 1.0 mL/min, 5% *i*-PrOH/hexanes,  $\lambda = 254$  nm);  $t_{\text{R}}$ (major) = 22.47 min,  $t_{\text{R}}$ (minor) = 14.96 min.  $[\alpha]_{\text{D}}^{24} = -35.7^\circ$  (c 0.11,  $\text{CHCl}_3$ ):  $^1\text{H}$  NMR (600 MHz,  $\text{CDCl}_3$ )  $\delta$  7.80 – 7.76 (m, 2H), 7.73 (d,  $J = 8.2$  Hz, 1H), 7.44 (t,  $J = 7.5$  Hz, 1H), 7.35 (t,  $J = 7.9$  Hz, 1H), 7.13 (s, 1H), 5.22 (q,  $J = 6.0$  Hz,

1H), 3.97 (s, 3H), 2.77 (s, 1H), 1.61 (d,  $J = 6.6$  Hz, 3H);  $^{13}\text{C}$  NMR (151 MHz,  $\text{CDCl}_3$ )  $\delta$  155.6, 135.0, 133.9, 128.9, 127.9, 126.5, 126.4, 125.3, 124.1, 105.6, 67.0, 55.5, 23.1. The spectral data match that previously reported in the literature for the racemic compound.<sup>9</sup>

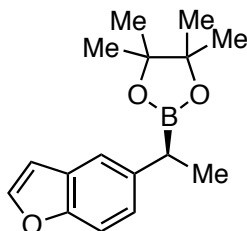

**(*S*)-2-(1-(benzofuran-5-yl)ethyl)-4,4,5,5-tetramethyl-1,3,2-dioxaborolane (2f).**

Prepared via General Procedure A, except that the reaction temperature was 50 °C, using ammonium salt **1f** (amine prepared in  $\geq 95\%$  ee). The crude mixture was purified by silica gel chromatography (5% EtOAc/hexanes) to give **2f** (run 1: 48 mg, 59%; run 2: 55 mg, 67%) as a white solid (mp 58–59 °C):  $^1\text{H}$  NMR (400 MHz,  $\text{CDCl}_3$ )  $\delta$  7.57 (d,  $J = 2.2$  Hz, 1H), 7.45 (d,  $J = 1.8$  Hz, 1H), 7.41 (d,  $J = 8.5$  Hz, 1H), 7.17 (dd,  $J = 8.6, 1.9$  Hz, 1H), 6.71 (dd,  $J = 2.2, 1.0$  Hz, 1H), 2.54 (q,  $J = 7.5$  Hz, 1H), 1.39 (d,  $J = 7.5$  Hz, 3H), 1.23 (s, 6H), 1.21 (s, 6H);  $^{13}\text{C}$  NMR (101 MHz,  $\text{CDCl}_3$ )  $\delta$  153.4, 144.9, 139.6, 127.7, 124.7, 119.8, 111.1, 106.7, 83.4, 24.79, 24.75, 17.9;<sup>4</sup>  $^{11}\text{B}$  NMR (193 MHz,  $\text{CDCl}_3$ )  $\delta$  33.6; FTIR (neat) 2976, 1467, 1319, 1144, 843, 737  $\text{cm}^{-1}$ ; HRMS (LIFDI) calculated for  $\text{C}_{16}\text{H}_{21}\text{BO}_3$ : 272.1584, found: 272.1611.

Boronate **2f** was oxidized to alcohol **3f** via General Procedure C. The enantiomeric excess was determined to be 98% (run 1: 97% ee; run 2: 98% ee) by chiral HPLC analysis. See alcohol **3f** below.

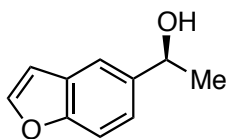

**(S)-1-(benzofuran-5-yl)ethanol (3f).** Prepared via General Procedure C using benzylic boronate **2f**. The crude mixture was purified by silica gel chromatography (20% EtOAc/hexanes) to give **3f** (run 1 (41 mg of **2f**): 15 mg, 61%) as a clear oil. The enantiomeric excess was determined to be 98% (run 1: 97% ee; run 2: 98% ee) by chiral HPLC analysis (CHIRALPAK IC, 0.5 mL/min, 2% *i*-PrOH/hexanes,  $\lambda=254$  nm);  $t_R(\text{major}) = 45.76$  min,  $t_R(\text{minor}) = 43.97$  min.  $[\alpha]_D^{24} = -33.0^\circ$  (c 0.79,  $\text{CHCl}_3$ );  $^1\text{H NMR}$  (400 MHz,  $\text{CDCl}_3$ )  $\delta$  7.67 – 7.57 (m, 2H), 7.48 (d,  $J = 8.5$  Hz, 1H), 7.32 (dd,  $J = 8.6, 1.8$  Hz, 1H), 6.76 (d,  $J = 1.1$  Hz, 1H), 5.01 (q,  $J = 6.4$  Hz, 1H), 1.92 (bs, 1H), 1.54 (d,  $J = 6.4$  Hz, 3H);  $^{13}\text{C NMR}$  (101 MHz,  $\text{CDCl}_3$ )  $\delta$  154.5, 145.6, 140.7, 127.6, 122.2, 118.1, 111.5, 106.8, 70.8, 25.7; FTIR (neat) 3344 (broad), 2921, 1444, 1261, 1129, 1072, 891, 813, 738  $\text{cm}^{-1}$ ; HRMS (CI+) calculated for  $\text{C}_{10}\text{H}_{11}\text{O}_2$ : 163.0759, found: 163.0756.

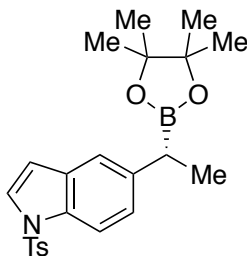

**(R)-5-(1-(4,4,5,5-tetramethyl-1,3,2-dioxaborolan-2-yl)ethyl)-1-tosyl-1H-indole (2g).** Prepared via General Procedure A using ammonium salt **1g** (prepared in  $\geq 95\%$  ee). Instead of filtering through Celite<sup>®</sup>, the diluted mixture was filtered through a small plug of silica gel and then concentrated. 1,3,5-Trimethoxybenzene was added as internal standard, and the yield was determined by  $^1\text{H NMR}$  to be 44% (run 1: 46%, run 2: 41%). The reaction mixture was complicated, preventing effective purification and isolation on scale. However, an analytical sample of **2g** (contaminated with  $\sim 15\%$   $\text{B}_2\text{pin}_2$ ) was purified by silica gel chromatography (prep TLC, 30% EtOAc/hexanes) to enable characterization:  $^1\text{H NMR}$  (600 MHz,  $\text{CDCl}_3$ )  $\delta$  7.85 (d,  $J = 8.6$  Hz, 1H), 7.75 (d,  $J = 8.3$  Hz, 2H), 7.49 (d,  $J = 3.6$  Hz, 1H), 7.34 (s, 1H), 7.20 (d,  $J = 8.1$  Hz, 2H), 7.17 (dd,  $J = 8.6, 1.3$  Hz, 1H), 6.57 (d,  $J = 3.6$  Hz, 1H), 2.48 (q,  $J = 7.5$  Hz, 1H), 2.33 (s, 3H), 1.32 (d,  $J = 7.5$  Hz, 3H), 1.20 (s, 6H), 1.18 (s, 6H);  $^{13}\text{C NMR}$  (101 MHz,  $\text{CDCl}_3$ )  $\delta$  144.9, 140.2, 135.6, 133.1, 131.2, 130.0, 127.0, 126.3, 125.2, 120.0, 113.4, 109.3, 83.5, 24.79, 24.76,

21.7, 17.6;<sup>4</sup> <sup>11</sup>B (193 MHz, CDCl<sub>3</sub>) δ 33.8; FTIR (neat, cm<sup>-1</sup>) 2977, 2930, 1459, 1372, 1173, 676, 583; HRMS (CI) calculated for C<sub>23</sub>H<sub>28</sub>BNO<sub>4</sub>S: 425.1832, found: 425.1840.

The sample was then concentrated and subjected to General Procedure C for oxidation and determination of enantiomeric excess.

Boronate **2g** was oxidized to alcohol **3g** via General Procedure C. The enantiomeric excess was determined to be 96% by chiral HPLC analysis. See alcohol **3g** below.

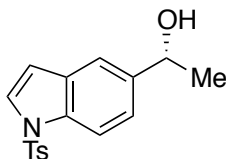

**(R)-1-(1-tosyl-1H-indol-5-yl)ethanol (3g)**. Prepared via General Procedure C using benzylic boronate **2g**. The crude mixture was purified by silica gel chromatography (40% EtOAc/hexanes) to give **3g** (run 1 (43 mg of **2g**): 34 mg, 79%) as a pale yellow semi-solid. The enantiomeric excess was determined to be 96% (run 1: 96% ee; run 2: 95% ee) by chiral HPLC analysis (CHIRALPAK IA, 1.0 mL/min, 5% *i*-PrOH/hexanes, λ=254 nm); t<sub>R</sub>(major) = 58.15 min, t<sub>R</sub>(minor) = 53.38 min. [α]<sub>D</sub><sup>24</sup> = -18.7° (c 0.165, CHCl<sub>3</sub>): <sup>1</sup>H NMR (400 MHz, CDCl<sub>3</sub>) δ 7.94 (d, *J* = 8.6 Hz, 1H), 7.75 (d, *J* = 8.4 Hz, 2H), 7.55 (d, *J* = 3.6 Hz, 1H), 7.52 (s, 1H), 7.31 (dd, *J* = 8.6, 1.5 Hz, 1H), 7.20 (d, *J* = 8.2 Hz, 2H), 6.62 (d, *J* = 3.6 Hz, 1H), 4.94 (q, *J* = 6.4 Hz, 1H), 2.32 (s, 3H), 1.99 (s, 1H), 1.49 (d, *J* = 6.4 Hz, 3H); <sup>13</sup>C NMR (101 MHz, CDCl<sub>3</sub>) δ 145.1, 141.2, 135.3, 134.3, 131.0, 130.0, 126.9, 126.9, 122.5, 118.2, 113.7, 109.2, 70.6, 25.5, 21.7; FTIR (neat) 3379 (broad), 2971, 1596, 1369, 1173, 1128, 676, 579 cm<sup>-1</sup>; HRMS (CI+) [M+H]<sup>+</sup> calculated for [C<sub>17</sub>H<sub>18</sub>NO<sub>3</sub>S]<sup>+</sup>: 316.1007, found: 316.1017.

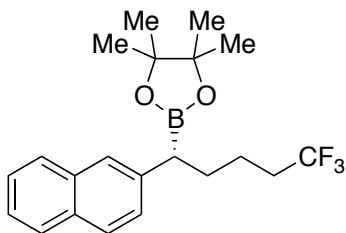

**(R)-4,4,5,5-tetramethyl-2-(5,5,5-trifluoro-1-(naphthalen-2-yl)pentyl)-1,3,2-dioxaborolane (2h).** Prepared via General Procedure A using ammonium salt **1h** (amine prepared in  $\geq 95\%$  ee). The crude mixture was purified by silica gel chromatography (5% EtOAc/hexanes) to give **2h** (run 1: 73 mg, 64%; run 2: 69 mg, 60%) as a white solid (mp 74–76 °C);  $^1\text{H}$  NMR (400 MHz,  $\text{CDCl}_3$ )  $\delta$  7.86 – 7.74 (m, 3H), 7.65 (s, 1H), 7.50 – 7.33 (m, 3H), 2.50 (t,  $J = 7.9$  Hz, 1H), 2.19 – 1.96 (m, 3H), 1.91 – 1.78 (m, 1H), 1.65 – 1.50 (m, 2H), 1.23 (s, 6H), 1.20 (s, 6H);  $^{13}\text{C}$  NMR (151 MHz,  $\text{CDCl}_3$ )  $\delta$  140.2, 134.0, 132.1, 128.1, 127.7, 127.6, 127.4 (q,  $J_{\text{C-F}} = 276.4$  Hz), 127.3, 126.5, 126.0, 125.2, 83.7, 33.9 (q,  $J_{\text{C-F}} = 28.4$  Hz), 31.6, 24.8, 24.7, 21.7 (q,  $J_{\text{C-F}} = 2.7$  Hz),<sup>4</sup>  $^{11}\text{B}$  NMR (193 MHz,  $\text{CDCl}_3$ )  $\delta$  33.1;  $^{19}\text{F}$  NMR (376.5 MHz,  $\text{CDCl}_3$ )  $\delta$  –66.3; FTIR (neat) 2978, 1361, 1259, 1141, 857, 749  $\text{cm}^{-1}$ ; HRMS (CI+) calculated for  $\text{C}_{21}\text{H}_{26}\text{BF}_3\text{O}_2$ : 379.2049, found: 379.2034.

Boronate **2h** was oxidized to alcohol **3h** via General Procedure C. The enantiomeric excess was determined to be 96% (run 1: 96% ee; run 2: 96% ee) by chiral HPLC analysis. See alcohol **3h** below.

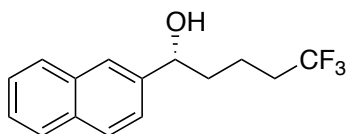

**(R)-5,5,5-trifluoro-1-(naphthalen-2-yl)pentan-1-ol (3h).** Prepared via General Procedure C using benzylic boronate **2h**. The crude mixture was purified by silica gel chromatography (20% EtOAc/hexanes) to give **3h** (run 1 (61 mg of **2h**): 40 mg, 93%) as a white solid (mp 48–50 °C). The enantiomeric excess was determined to be 96% (run 1: 96% ee; run 2: 96% ee) by chiral HPLC analysis (CHIRALPAK IB, 1.0 mL/min, 3% *i*-PrOH/hexanes,  $\lambda = 254$  nm);  $t_{\text{R}}(\text{major}) = 28.25$  min,  $t_{\text{R}}(\text{minor}) = 25.09$  min.  $[\alpha]_{\text{D}}^{24} =$

+38.4° (c 0.75, CHCl<sub>3</sub>): <sup>1</sup>H NMR (400 MHz, CDCl<sub>3</sub>) δ 7.89 – 7.80 (m, 3H), 7.76 (s, 1H), 7.55 – 7.48 (m, 2H), 7.46 (dd, *J* = 8.6, 1.8 Hz, 1H), 4.87 – 4.79 (m, 1H), 2.20 – 2.02 (m, 3H), 1.99 – 1.67 (m, 3H), 1.68 – 1.52 (m, 1H); <sup>13</sup>C NMR (101 MHz, CDCl<sub>3</sub>) δ 141.7, 133.4, 133.2, 128.7, 128.1, 127.9, 127.2 (q, *J*<sub>C-F</sub> = 277.5 Hz), 126.5, 126.2, 124.7, 123.9, 74.4, 37.8, 33.7 (q, *J*<sub>C-F</sub> = 28.6 Hz), 18.6 (q, *J*<sub>C-F</sub> = 3.0 Hz); <sup>19</sup>F NMR (376.5 Hz, CDCl<sub>3</sub>) δ –66.3; FTIR (neat) 3350 (broad), 2947, 1391, 1259, 1134, 1028, 821, 749, 479 cm<sup>-1</sup>; HRMS (CI<sup>+</sup>) calculated for C<sub>15</sub>H<sub>16</sub>F<sub>3</sub>O: 269.1153, found: 269.1158.

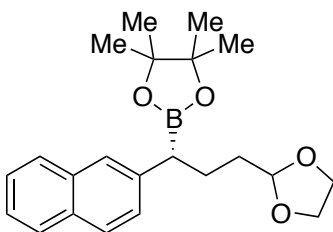

**(*R*)-2-(3-(1,3-dioxolan-2-yl)-1-(naphthalen-2-yl)propyl)-4,4,5,5-tetramethyl-1,3,2-dioxaborolane (2i).** Prepared via General Procedure A using ammonium salt **1i** (amine prepared in ≥95% ee). The crude mixture was purified by silica gel chromatography (10% EtOAc/hexanes) to give **2i** (64 mg, 58%) as a white solid (mp 82–84 °C) (note: a 10:1 mixture of product to B<sub>2</sub>pin<sub>2</sub> was observed): <sup>1</sup>H NMR (400 MHz, CDCl<sub>3</sub>) δ 7.81 – 7.72 (m, 3H), 7.65 (s, 1H), 7.47 – 7.36 (m, 3H), 4.86 (t, *J* = 4.8 Hz, 1H), 3.98 – 3.77 (m, 4H), 2.51 (t, *J* = 8.0 Hz, 1H), 2.15 – 2.01 (m, 1H), 1.99 – 1.84 (m, 1H), 1.76 – 1.59 (m, 2H), 1.21 (s, 6H), 1.19 (s, 6H); <sup>13</sup>C NMR (101 MHz, CDCl<sub>3</sub>) δ 140.5, 133.9, 131.9, 127.9, 127.63, 127.59, 127.5, 126.5, 125.8, 125.0, 104.7, 83.5, 64.9, 33.5, 26.8, 24.8, 24.7; <sup>11</sup>B NMR (193 MHz, CDCl<sub>3</sub>) δ 33.2; FTIR (neat) 2977, 2882, 1371, 1324, 1141, 857, 750 cm<sup>-1</sup>; HRMS (LIFDI) calculated for C<sub>22</sub>H<sub>29</sub>BO<sub>4</sub>: 368.2140, found: 368.2143.

Boronate **2i** was oxidized to alcohol **3i** via General Procedure C. The enantiomeric excess was determined to be 98% by chiral HPLC analysis. See alcohol **3i** below.

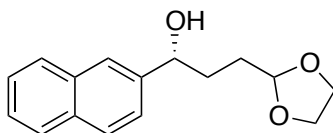

**(R)-3-(1,3-dioxolan-2-yl)-1-(naphthalen-2-yl)propan-1-ol (3i).** Prepared via General Procedure C using benzylic boronate **2i**. The crude mixture was purified by silica gel chromatography (40% EtOAc/hexanes) to give **3i** (36 mg, 84%) as a white solid (mp 67–69 °C). The enantiomeric excess was determined to be 98% by chiral HPLC analysis (CHIRALPAK IB, 1.0 mL/min, 5% *i*-PrOH/hexanes,  $\lambda=254$  nm);  $t_R(\text{major}) = 31.06$  min,  $t_R(\text{minor}) = 27.49$  min.  $[\alpha]_D^{24} = -18.4^\circ$  (c 1.78, CHCl<sub>3</sub>); <sup>1</sup>H NMR (400 MHz, CDCl<sub>3</sub>)  $\delta$  7.87 – 7.78 (m, 4H), 7.53 – 7.40 (m, 3H), 4.96 – 4.85 (m, 2H), 4.03 – 3.81 (m, 4H), 2.74 (d,  $J = 3.5$  Hz, 1H), 2.05 – 1.92 (m, 2H), 1.91 – 1.73 (m, 2H); <sup>13</sup>C NMR (101 MHz, CDCl<sub>3</sub>)  $\delta$  142.1, 133.4, 133.0, 128.4, 128.1, 127.8, 126.2, 125.9, 124.6, 124.2, 104.4, 74.3, 65.2, 65.1, 33.1, 30.1; FTIR (neat) 3434 (broad), 2882, 1409, 1139, 1031, 822, 751, 479 cm<sup>-1</sup>; HRMS (CI+) calculated for C<sub>16</sub>H<sub>18</sub>O<sub>3</sub>: 241.1229, found: 241.1225.

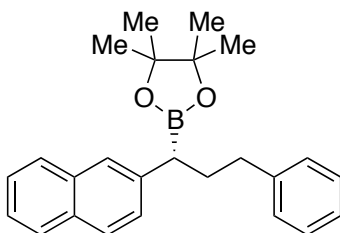

**(R)-4,4,5,5-tetramethyl-2-(1-(naphthalen-2-yl)-3-phenylpropyl)-1,3,2-dioxaborolane (2j).** Prepared via General Procedure A using ammonium salt **1j** (amine prepared in  $\geq 95\%$  ee). The crude mixture was purified by silica gel chromatography (5% EtOAc/hexanes) to give **2j** (80 mg, 72%) as a white solid (mp 77–79 °C): <sup>1</sup>H NMR (400 MHz, CDCl<sub>3</sub>)  $\delta$  7.87 – 7.79 (m, 3H), 7.71 (s, 1H), 7.52 – 7.41 (m, 3H), 7.34 – 7.28 (m, 2H), 7.24 – 7.18 (m, 3H), 2.65 (t,  $J = 7.9$  Hz, 2H), 2.60 (t,  $J = 7.9$  Hz, 1H), 2.37 – 2.26 (m, 1H), 2.21 – 2.10 (m, 1H), 1.25 (s, 6H), 1.23 (s, 6H); <sup>13</sup>C NMR (101 MHz, CDCl<sub>3</sub>)  $\delta$  142.6, 140.6, 133.9, 131.9, 128.7, 128.4, 128.0, 127.7, 127.6, 127.5, 126.5, 125.84, 125.81, 125.0, 83.6, 35.6, 34.3, 24.84, 24.76;<sup>4</sup> <sup>11</sup>B NMR (193 MHz, CDCl<sub>3</sub>)  $\delta$  33.7; FTIR



(neat) 2977, 2930, 1323, 1141, 857, 748, 699  $\text{cm}^{-1}$ ; HRMS (LIFDI) calculated for  $\text{C}_{25}\text{H}_{29}\text{BO}_2$ : 372.2261, found: 372.2270.

Boronate **2j** was oxidized to alcohol **3j** via General Procedure C. The enantiomeric excess was determined to be 98% by chiral HPLC analysis. See alcohol **3j** below.

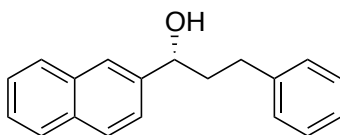

**(R)-1-(naphthalen-2-yl)-3-phenylpropan-1-ol (3j)**. Prepared via General Procedure C using benzylic boronate **2j**. The crude mixture was purified by silica gel chromatography (20% EtOAc/hexanes) to give **3j** (43 mg, 94%) as a white solid (mp 85–86 °C). The enantiomeric excess was determined to be 98% by chiral HPLC analysis (CHIRALPAK IA, 1.0 mL/min, 2% *i*-PrOH/hexanes,  $\lambda=254$  nm);  $t_{\text{R}}(\text{major}) = 35.44$  min,  $t_{\text{R}}(\text{minor}) = 38.33$  min:  $^1\text{H}$  NMR (400 MHz,  $\text{CDCl}_3$ )  $\delta$  7.89 – 7.81 (m, 3H), 7.79 (s, 1H), 7.55 – 7.44 (m, 3H), 7.34 – 7.27 (m, 2H), 7.25 – 7.16 (m, 3H), 4.87 (ddd,  $J = 8.1, 5.5, 2.9$  Hz, 1H), 2.85 – 2.65 (m, 2H), 2.30 – 2.06 (m, 2H), 2.02 (d,  $J = 3.1$  Hz, 1H);  $^{13}\text{C}$  NMR (151 MHz,  $\text{CDCl}_3$ )  $\delta$  142.1, 141.9, 133.5, 133.2, 128.56, 128.59, 128.63, 128.1, 127.9, 126.4, 126.1, 126.0, 124.9, 124.2, 74.2, 40.5, 32.2. The spectral data match that of the literature.<sup>10</sup>

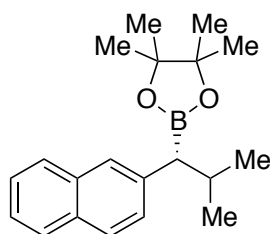

**(R)-4,4,5,5-tetramethyl-2-(2-methyl-1-(naphthalen-2-yl)propyl)-1,3,2-dioxaborolane (2k)**. Prepared via General Procedure A using ammonium salt **1k** (amine prepared in  $\geq 95\%$  ee). The crude mixture was purified by silica gel chromatography (5% EtOAc/hexanes) to give **2k** (run 1: 46 mg, 49%; run 2: 47 mg, 50%) as a white solid (mp 85–86 °C);  $^1\text{H}$  NMR (400 MHz,  $\text{CDCl}_3$ )  $\delta$  7.83 – 7.71 (m, 3H), 7.66 (s, 1H), 7.47 – 7.36

(m, 3H), 2.33 – 2.19 (m, 1H), 2.16 (d,  $J = 10.5$  Hz, 1H), 1.21 (s, 6H), 1.18 (s, 6H), 1.10 (d,  $J = 6.4$  Hz, 3H), 0.77 (d,  $J = 6.4$  Hz, 3H);  $^{13}\text{C}$  NMR (101 MHz,  $\text{CDCl}_3$ )  $\delta$  140.2, 133.9, 132.0, 128.1, 127.7, 127.6, 127.3, 125.7, 124.9, 83.4, 31.1, 24.8, 24.7, 23.4, 22.3;<sup>4</sup>  $^{13}\text{C}$  NMR (151 MHz,  $\text{C}(\text{O})(\text{CD}_3)_2$ )  $\delta$  141.2, 134.7, 132.9, 128.7, 128.3, 128.3, 128.2, 127.9, 126.6, 125.7, 83.9, 31.7, 25.0, 24.9, 23.5, 22.4;<sup>4</sup>  $^{11}\text{B}$  NMR (193 MHz,  $\text{CDCl}_3$ )  $\delta$  33.2; FTIR (neat) 2922, 2850, 1382, 1323, 1143, 1103  $\text{cm}^{-1}$ ; HRMS (LIFDI) calculated for  $\text{C}_{20}\text{H}_{27}\text{BO}_2$ : 310.2104, found: 310.2126.

Boronate **2k** was oxidized to alcohol **3k** via General Procedure C. The enantiomeric excess was determined to be 98% (run 1: 97%, run 2: 98%) by chiral HPLC analysis. See alcohol **3k** below.

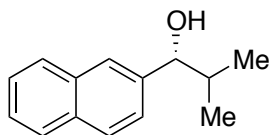

**(R)-2-methyl-1-(naphthalen-2-yl)propan-1-ol (3k)**. Prepared via General Procedure C using benzylic boronate **2k**. The crude mixture was purified by silica gel chromatography (20% EtOAc/hexanes) to give **3k** (run 1 (39 mg of **2k**): 7 mg, 28%) as a clear oil. The enantiomeric excess was determined to be 98% (run 1: 97%, run 2: 98%) by chiral HPLC analysis (CHIRALPAK IC, 1.0 mL/min, 2% *i*-PrOH/hexanes,  $\lambda=254$  nm);  $t_{\text{R}}(\text{major}) = 17.49$  min,  $t_{\text{R}}(\text{minor}) = 16.15$  min;  $^1\text{H}$  NMR (600 MHz,  $\text{CDCl}_3$ )  $\delta$  7.86 – 7.80 (m, 3H), 7.76 (s, 1H), 7.51 – 7.44 (m, 3H), 4.54 (d,  $J = 6.9$  Hz, 1H), 2.12 – 2.03 (m,  $J = 6.7$  Hz, 1H), 1.93 (s, 1H), 1.05 (d,  $J = 6.7$  Hz, 3H), 0.84 (d,  $J = 6.8$  Hz, 3H);  $^{13}\text{C}$  NMR (101 MHz,  $\text{CDCl}_3$ )  $\delta$  141.2, 133.3, 133.1, 128.2, 128.1, 127.8, 126.2, 125.9, 125.6, 124.8, 80.4, 35.4, 19.3, 18.4. The spectral data match that previously reported in the literature.<sup>11</sup>

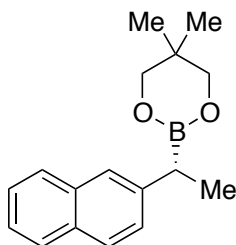

**(R)-5,5-dimethyl-2-(1-(naphthalen-2-yl)ethyl)-1,3,2-dioxaborinane (2l).** Prepared via General Procedure A using ammonium salt **1a** (amine purchased in >99% ee) and bis(neopentyl glycolato)diboron ( $B_2neop_2$ ) instead of  $B_2pin_2$ . Instead of filtering through Celite<sup>®</sup>, the diluted mixture was filtered through a small plug of silica gel and then concentrated. 1,3,5-Trimethoxybenzene was added as internal standard, and the yield of the reaction was determined by <sup>1</sup>H NMR analysis to be 61%. The sample was then concentrated and subjected to General Procedure C for oxidation and determination of enantiomeric excess.

Boronate **2l** was oxidized to alcohol **3a** via General Procedure C. The enantiomeric excess was determined to be 95% by chiral HPLC analysis. See alcohol **3a** below.

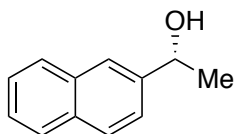

**(R)-1-(naphthalen-2-yl)ethanol (3a).** Prepared via General Procedure C using benzylic boronate **2l**. The crude mixture was purified by silica gel chromatography (20% EtOAc/hexanes) to give **3a** (29 mg, 93%) as a white solid. The enantiomeric excess was determined to be 95% by chiral HPLC analysis (CHIRALPAK IA, 1.0 mL/min, 1% *i*-PrOH/hexanes,  $\lambda=254$  nm);  $t_R(\text{major}) = 45.06$  min,  $t_R(\text{minor}) = 47.29$  min. The spectral data match that of alcohol **3a** above.

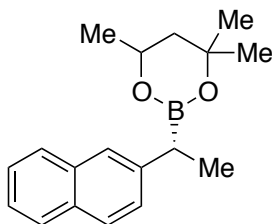

**4,4,6-trimethyl-2-((R)-1-(naphthalen-2-yl)ethyl)-1,3,2-dioxaborinane (2m).** Prepared via General Procedure A using ammonium salt **1a** (amine purchased in >99% ee) and bis(hexylene glycolato)diboron ( $B_2hex_2$ ) instead of  $B_2pin_2$ . Instead of filtering through

Celite<sup>®</sup>, the diluted mixture was filtered through a small plug of silica gel and then concentrated. 1,3,5-Trimethoxybenzene was added as internal standard, and the yield of the reaction was determined by <sup>1</sup>H NMR analysis to be 74%. The sample was then concentrated and subjected to General Procedure C for oxidation and determination of enantiomeric excess.

Boronate **2m** was oxidized to alcohol **3a** via General Procedure C. The enantiomeric excess was determined to be 95% by chiral HPLC analysis. See alcohol **3a** below.

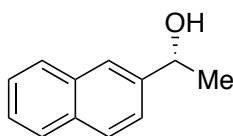

**(R)-1-(naphthalen-2-yl)ethanol (3a)**. Prepared via General Procedure C using benzylic boronate **2m**. The crude mixture was purified by silica gel chromatography (20% EtOAc/hexanes) to give **3a** (35 mg, quant.) as a white solid. The enantiomeric excess was determined to be 95% by chiral HPLC analysis (CHIRALPAK IA, 1.0 mL/min, 1% *i*-PrOH/hexanes,  $\lambda=254$  nm);  $t_R(\text{major}) = 44.64$  min,  $t_R(\text{minor}) = 46.84$  min. The spectral data match that of alcohol **3a** above.

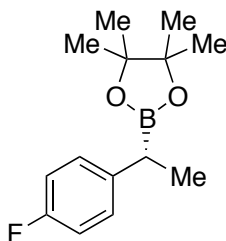

**(R)-2-(1-(4-fluorophenyl)ethyl)-4,4,5,5-tetramethyl-1,3,2-dioxaborolane (2n)**. Prepared via General Procedure B on a 0.5-mmol scale using ammonium salt **1n** (amine purchased in >99% ee) and ICy·HBF<sub>4</sub> (19.2 mg, 0.060 mmol, 12 mol %) instead of PPh<sub>2</sub>Cy. The crude mixture was purified by silica gel chromatography (5% EtOAc/hexanes) to give **2n** (66 mg, 53%) as a clear oil (please note that **2n** was not

subjected to high vacuum due to its volatility):  $^1\text{H}$  NMR (400 MHz,  $\text{CDCl}_3$ )  $\delta$  7.20 – 7.13 (m, 2H), 6.98 – 6.91 (m, 2H), 2.42 (q,  $J = 7.5$  Hz, 1H), 1.31 (d,  $J = 7.5$  Hz, 3H), 1.21 (s, 6H), 1.20 (s, 6H);  $^{13}\text{C}$  NMR (101 MHz,  $\text{CDCl}_3$ )  $\delta$  161.0 (d,  $J_{\text{C-F}} = 243.2$  Hz), 140.7 (d,  $J_{\text{C-F}} = 3.1$  Hz), 129.1 (d,  $J_{\text{C-F}} = 7.7$  Hz), 115.1 (d,  $J_{\text{C-F}} = 21.0$  Hz), 83.5, 24.8, 17.4. The spectral data match that reported in the literature.<sup>12</sup> The sample was then concentrated and subjected to General Procedure C for oxidation and determination of enantiomeric excess.

Boronate **2n** was oxidized to alcohol **3n** via General Procedure C. The enantiomeric excess was determined to be 86% (run 1 from oxidation of isolated **2n**: 87% ee; run 2 from oxidation of crude **2n**: 85% ee) by chiral HPLC analysis. See alcohol **3n** below.

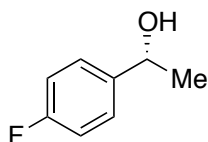

**(R)-1-(4-fluorophenyl)ethanol (3n)**. Prepared via General Procedure C using benzylic boronate **2n**. The crude mixture was purified by silica gel chromatography (20% EtOAc/hexanes) to give **3n** (16 mg, 62%) as a clear oil. The enantiomeric excess was determined to be 86% (run 1 from oxidation of isolated **2n**: 87% ee; run 2 from oxidation of crude **2n**: 85% ee) by chiral HPLC analysis (CHIRALPAK IF, 1.0 mL/min, 2% *i*-PrOH/hexanes,  $\lambda = 254$  nm);  $t_{\text{R}}$ (major) = 16.25 min,  $t_{\text{R}}$ (minor) = 17.65 min:  $^1\text{H}$  NMR (600 MHz,  $\text{CDCl}_3$ )  $\delta$  7.34 (dd,  $J = 8.3, 5.6$  Hz, 2H), 7.03 (t,  $J = 8.6$  Hz, 2H), 4.89 (q,  $J = 6.4$  Hz, 1H), 1.87 (s, 1H), 1.48 (d,  $J = 6.5$  Hz, 3H);  $^{13}\text{C}$  NMR (151 MHz,  $\text{CDCl}_3$ )  $\delta$  162.3 (d,  $J_{\text{C-F}} = 244.6$  Hz), 141.7, 127.2 (d,  $J_{\text{C-F}} = 7.6$  Hz), 115.4 (d,  $J_{\text{C-F}} = 22.7$  Hz), 70.0, 25.5;  $^{19}\text{F}$  NMR (565 MHz,  $\text{CDCl}_3$ )  $\delta$  -115.4. The spectral data match that of the literature.<sup>13</sup>

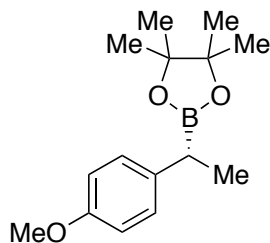

**(*R*)-2-(1-(4-methoxyphenyl)ethyl)-4,4,5,5-tetramethyl-1,3,2-dioxaborolane (2o).**

Prepared via General Procedure B using ammonium salt **1o** (amine precursor purchased in >99% ee). The crude mixture was purified by silica gel chromatography (5% EtOAc/hexanes) to give **2o** (run 1: 45 mg, 57%; run 2: 41 mg, 52%) as a clear oil:  $^1\text{H}$  NMR (400 MHz,  $\text{CDCl}_3$ )  $\delta$  7.14 (d,  $J = 8.6$  Hz, 2H), 6.82 (d,  $J = 8.6$  Hz, 2H), 3.78 (s, 3H), 2.38 (q,  $J = 7.5$  Hz, 1H), 1.30 (d,  $J = 7.6$  Hz, 3H), 1.22 (s, 6H), 1.20 (s, 6H);  $^{13}\text{C}$  NMR (101 MHz,  $\text{CDCl}_3$ )  $\delta$  157.2, 137.0, 128.6, 113.8, 83.2, 55.2, 24.7, 24.6, 17.4.<sup>4</sup> The spectral data matches that previously reported in the literature.<sup>14</sup>

Boronate **2o** was oxidized to alcohol **3o** via General Procedure C. The enantiomeric excess was determined to be 86% (run 1: 85% ee; run 2: 87% ee) by chiral HPLC analysis. See alcohol **3o** below.

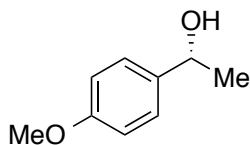

**(*R*)-1-(4-methoxyphenyl)ethanol (3o).** Prepared via General Procedure C using benzylic boronate **2o**. The crude mixture was purified by silica gel chromatography (20% EtOAc/hexanes) to give **3o** (run 1 (45 mg of **2o**): 19 mg, 72%) as a clear oil. The enantiomeric excess was determined to be 86% (run 1: 85%, run 2: 87%) by chiral HPLC analysis (CHIRALPAK IB, 1.0 mL/min, 2% *i*-PrOH/hexanes,  $\lambda=254$  nm);  $t_{\text{R}}(\text{major}) = 20.16$  min,  $t_{\text{R}}(\text{minor}) = 22.24$  min:  $^1\text{H}$  NMR (400 MHz,  $\text{CDCl}_3$ )  $\delta$  7.30 (d,  $J = 8.6$  Hz, 2H), 6.88 (d,  $J = 8.6$  Hz, 2H), 4.86 (q,  $J = 6.4$  Hz, 1H), 3.80 (s, 3H), 1.84 (bs, 1H), 1.48 (d,  $J = 6.4$  Hz, 3H);  $^{13}\text{C}$  NMR (101 MHz,  $\text{CDCl}_3$ )  $\delta$  159.1, 138.1, 126.8, 114.0, 70.2, 55.5, 25.2. The spectral data match that previously reported in the literature.<sup>15</sup>

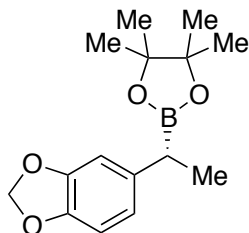

**(R)-2-(1-(benzo[d][1,3]dioxol-5-yl)ethyl)-4,4,5,5-tetramethyl-1,3,2-dioxaborolane**

**(2p).** Prepared via General Procedure B using ammonium salt **1p** (amine prepared in  $\geq 95\%$  ee). The crude mixture was purified by silica gel chromatography (5% EtOAc/hexanes) to give **2p** (run 1: 48 mg, 58%; run 2: 53 mg, 63%) as a clear oil:  $^1\text{H}$  NMR (400 MHz,  $\text{CDCl}_3$ )  $\delta$  6.74 (d,  $J = 1.7$  Hz, 1H), 6.71 (d,  $J = 8.0$  Hz, 1H), 6.65 (dd,  $J = 8.0, 1.7$  Hz, 1H), 5.90 (s, 2H), 2.35 (q,  $J = 7.5$  Hz, 1H), 1.28 (d,  $J = 7.5$  Hz, 3H), 1.22 (s, 6H), 1.20 (s, 6H);  $^{13}\text{C}$  NMR (101 MHz,  $\text{CDCl}_3$ )  $\delta$  147.6, 145.2, 139.0, 120.5, 108.6, 108.3, 100.8, 83.5, 24.8, 24.8, 17.7;<sup>4</sup>  $^{11}\text{B}$  NMR (193 MHz,  $\text{CDCl}_3$ )  $\delta$  33.3; FTIR (neat) 2977, 1487, 1321, 1237, 1144, 1041, 938, 811  $\text{cm}^{-1}$ ; HRMS (CI) calculated for  $\text{C}_{15}\text{H}_{21}\text{BO}_4$ : 277.1611, found: 277.1609.

Boronate **2p** was oxidized to alcohol **3p** via General Procedure C. The enantiomeric excess was determined to be 85% (run 1: 84% ee; run 2: 85% ee) by chiral HPLC analysis. See alcohol **3p** below.

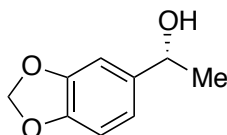

**(R)-1-(benzo[d][1,3]dioxol-5-yl)ethanol (3p).** Prepared via General Procedure C using benzylic boronate **2p**. The crude mixture was purified by silica gel chromatography (20% EtOAc/hexanes) to give **3p** (run 1 (40 mg of **2o**): 21 mg, 87%) as a clear oil. The enantiomeric excess was determined to be 85% (run 1: 85%, run 2: 84%) by chiral HPLC analysis (CHIRALPAK IA, 1.0 mL/min, 3% *i*-PrOH/hexanes,  $\lambda = 210$  nm);  $t_{\text{R}}$ (major) = 19.60 min,  $t_{\text{R}}$ (minor) = 22.01 min:  $^1\text{H}$  NMR (400 MHz,  $\text{CDCl}_3$ )  $\delta$  6.92 – 6.88 (m, 1H), 6.85 – 6.75 (m, 2H), 5.95 (s, 2H), 4.82 (q,  $J = 6.4$  Hz, 1H), 1.76 (bs, 1H), 1.46 (d,  $J = 6.4$  Hz, 3H);  $^{13}\text{C}$  NMR (101 MHz,  $\text{CDCl}_3$ )  $\delta$  147.9, 147.0, 140.1, 118.9, 108.3, 106.2, 101.2, 70.5, 25.3. The spectral data match that previously reported in the literature.<sup>15</sup>

## Gram-Scale Synthesis of (S)-2-(1-(6-methoxynaphthalen-2-yl)ethyl)-4,4,5,5-tetramethyl-1,3,2-dioxaborolane (2c)

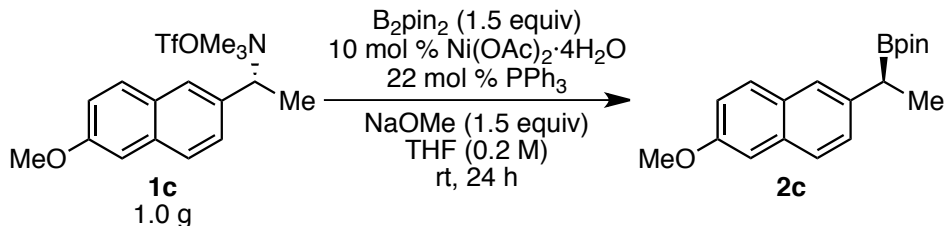

An oven-dried, 50-mL Schlenk flask equipped with a magnetic stir bar was evacuated and backfilled with  $N_2$  (x 4).  $Ni(OAc)_2 \cdot 4H_2O$  (63 mg, 0.254 mmol, 10 mol %),  $PPh_3$  (147 mg, 0.559 mmol, 22 mol %),  $B_2pin_2$  (0.968 g, 3.81 mmol, 1.5 equiv), and ammonium salt **1c** ( $\geq 95\%$  ee, 1.00 g, 2.54 mmol, 1.0 equiv) were added. NaOMe (0.206 g, 3.81 mmol, 1.5 equiv) was quickly added and the flask was sealed with a rubber septum. The flask was evacuated and then backfilled with  $N_2$  (x 4). THF (13 mL, 0.2 M) was then added. The mixture was stirred vigorously at room temperature for 24 h. Over the course of the reaction, the solution turned from light yellow to dark orange.  $Et_2O$  (~ 40 mL) was added, and the mixture was stirred for five minutes. The mixture was filtered through a pad of Celite<sup>®</sup>, which was then washed multiple times with  $Et_2O$  (~ 120 mL total volume). The filtrate was concentrated, and the crude material was purified by silica gel chromatography (5% EtOAc/hexanes) to give **2c** (68%, 99% ee) as a white solid. The spectra of this material match that of **2c** prepared on 0.3 mmol scale, as described above.

Boronate **2c** was oxidized to alcohol **3c** via General Procedure C. The enantiomeric excess was determined to be 99% by chiral HPLC analysis. The spectral data of this alcohol match that of alcohol **2c** as described above.

## Preparation of Benzyl Ammonium Salts

Enantioenriched amines that were not commercially available were obtained through Grignard or hydride additions to Ellman's sulfinimines.<sup>2</sup> Via these reactions, a single diastereomer of each sulfinamine was isolated (as determined by  $^1H$  NMR analysis). We thus assume  $\geq 95\%$  ee of the subsequent amine after removal of Ellman's



auxiliary. Dimethyl benzyl amines were then prepared using Eschweiler-Clarke conditions or reductive amination of the corresponding primary benzyl amine with formaldehyde.<sup>3</sup> We assume no loss of ee in the formation of the trimethyl ammonium triflates from this intermediate. For enantioenriched amines that were commercially available, we also assume no loss of ee in the formation of the trimethyl ammonium triflates.

Ammonium triflates **1a**, **1b**, **1k**, **1n**, and **1o** have been previously prepared in our laboratory.<sup>16</sup>

Ammonium triflates prepared via these procedures were used as is in the stereospecific borylation reaction, without further purification. In some cases, impurities are present in the ammonium triflates.

#### General Procedure D: Preparation of (*S*)-*N,N,N*-trimethyl-1-(naphthalen-1-yl)ethanaminium trifluoromethanesulfonate (**1b**)

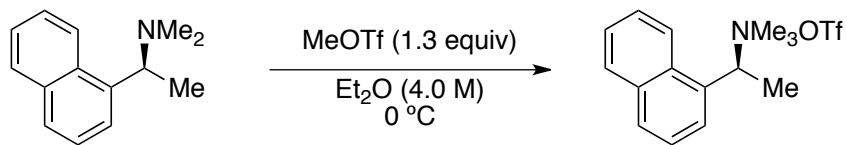

(*S*)-*N,N*-Dimethyl-1-(naphthalen-1-yl)ethanamine (0.806 g, 4.04 mmol, 1.0 equiv), which was prepared using Eschweiler-Clarke conditions<sup>3a</sup> from (*S*)-(-)-1-(1-naphthyl)ethylamine (purchased in >99% ee), was dissolved in Et<sub>2</sub>O (1.01 mL, 4.0 M). MeOTf (0.58 mL, 5.25 mmol, 1.3 equiv) was added dropwise at 0 °C. After complete addition, the mixture was allowed to stir for an additional 30 minutes at 0 °C. The mixture was diluted with Et<sub>2</sub>O (~ 2 mL), taken out of the ice bath, and allowed to warm to room temperature while stirring. The white precipitate was filtered and washed with Et<sub>2</sub>O (3 x 15 mL). The solid was dried under high vacuum to afford salt **1b** (1.377 g,

94%) as a white solid, which was used directly in the benzylic borylation. This compound was previously prepared in our laboratory via this method.<sup>15</sup>

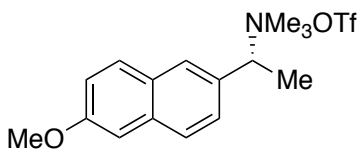

**(*R*)-1-(6-methoxynaphthalen-2-yl)-*N,N,N*-trimethylethanaminium**

**trifluoromethanesulfonate (1c).** Prepared according to General Procedure D on a 5.64 mmol scale from (*R*)-1-(6-methoxynaphthalen-2-yl)-*N,N*-dimethylethanamine, which was prepared using Eschweiler-Clarke conditions<sup>3a</sup> from (*R*)-1-(6-methoxynaphthalen-2-yl)ethanamine (prepared using Ellman's auxiliary<sup>2</sup>), to afford salt **1c** (2.085 g, 94%) as a white solid (mp 109–111 °C): <sup>1</sup>H NMR (600 MHz, CDCl<sub>3</sub>) δ 7.94 (s, 1H), 7.84-7.74 (m, 2H), 7.49 (d, *J* = 8.3 Hz, 1H), 7.19 (dd, *J* = 9.0, 2.4 Hz, 1H), 7.13 (d, *J* = 2.1 Hz, 1H), 4.98 (q, *J* = 6.9 Hz, 1H), 3.92 (s, 3H), 3.15 (s, 9H), 1.88 (d, *J* = 6.8 Hz, 3H); <sup>13</sup>C NMR (151 MHz, CDCl<sub>3</sub>) δ 159.3, 135.6, 130.2, 128.4, 128.1, 127.2, 121.0 (q, *J*<sub>C-F</sub> = 320.1 Hz), 120.4, 105.7, 74.5, 55.6, 51.2, 15.2; <sup>19</sup>F NMR (376.5 MHz, CDCl<sub>3</sub>) δ -78.4; FTIR (neat) 3043, 1608, 1488, 1270, 1160, 846, 639 cm<sup>-1</sup>; LRMS (ESI+) [M-OTf]<sup>+</sup> calculated for [C<sub>16</sub>H<sub>22</sub>NO<sup>+</sup>]: 244.2, found: 244.2.

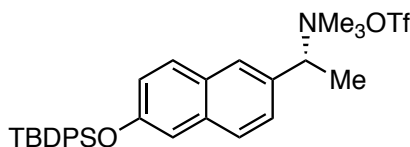

**(*R*)-1-(6-((*tert*-butyldiphenylsilyl)oxy)naphthalen-2-yl)-*N,N,N*-**

**trimethylethanaminium trifluoromethanesulfonate (1d).** Prepared according to General Procedure D on a 1.50 mmol scale from (*R*)-1-(6-((*tert*-butyldiphenylsilyl)oxy)naphthalen-2-yl)-*N,N*-dimethylethanamine, which was prepared by reductive amination<sup>3b</sup> from (*R*)-1-(6-((*tert*-butyldiphenylsilyl)oxy)naphthalen-2-yl)ethanamine (prepared using Ellman's auxiliary<sup>2</sup>). In this case, stirring ceased as a

result of precipitate formation. The solution was diluted with Et<sub>2</sub>O to 2.0 M and the stir bar was agitated with a spatula to resume stirring. The reaction afforded salt **1d** (0.698 g, 75%) as a white solid (mp 180–182 °C): <sup>1</sup>H NMR (600 MHz, CDCl<sub>3</sub>) δ 7.87 (s, 1H), 7.74 (d, *J* = 6.9 Hz, 4H), 7.69 (d, *J* = 8.9 Hz, 1H), 7.53 (d, *J* = 8.6 Hz, 1H), 7.45 – 7.40 (m, 2H), 7.39 – 7.33 (m, 5H), 7.13 (dd, *J* = 8.9, 2.4 Hz, 1H), 7.05 (d, *J* = 2.1 Hz, 1H), 4.92 (q, *J* = 6.9 Hz, 1H), 3.13 (s, 9H), 1.84 (d, *J* = 6.9 Hz, 3H), 1.13 (s, 9H); <sup>13</sup>C NMR (151 MHz, CDCl<sub>3</sub>) δ 155.3, 135.6, 135.4, 132.6, 130.3, 130.1, 128.5, 128.14, 128.09, 127.2, 123.3, 120.9 (q, *J*<sub>C-F</sub> = 320.1 Hz), 114.6, 74.6, 51.2, 26.7, 19.7, 15.2; <sup>19</sup>F NMR (565 MHz, CDCl<sub>3</sub>) δ –78.4; <sup>29</sup>Si NMR (119 MHz, CDCl<sub>3</sub>) δ –5.0; FTIR (neat) 3051, 2933, 2859, 1605, 1483, 1266, 1161, 1031, 879, 703, 639 cm<sup>-1</sup>; LRMS (ESI+) [*M*-OTf]<sup>+</sup> calculated for [C<sub>31</sub>H<sub>38</sub>NOSi<sup>+</sup>]: 468.3, found: 468.4.

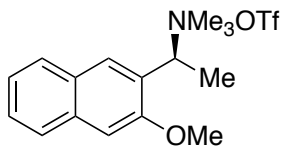

**(*S*)-1-(3-methoxynaphthalen-2-yl)-*N,N,N*-trimethylethanaminium**

**trifluoromethanesulfonate (1e)** Prepared according to General Procedure D on a 1.45 mmol scale from (*S*)-1-(3-methoxynaphthalen-2-yl)-*N,N*-dimethylethanamine, which was prepared using Eschweiler-Clarke conditions<sup>3a</sup> from (*S*)-1-(3-methoxynaphthalen-2-yl)ethanamine (prepared using Ellman's auxiliary<sup>2</sup>). In this case, a white precipitate did not form upon addition of MeOTf. Instead, two distinct layers formed. The top layer was decanted off. The bottom layer was washed with Et<sub>2</sub>O (5 x 2 mL) and then hexanes (5 x 2 mL, HPLC grade) and then dried under high vacuum to give salt **1e** (0.359 g, 63%) as a clear viscous oil. By NMR, an ~8:1 mixture of rotamers was observed: <sup>1</sup>H NMR (600 MHz, CDCl<sub>3</sub>, major rotamer) δ 7.97 (s, 1H), 7.87 (d, *J* = 8.2 Hz, 1H), 7.73 (d, *J* = 8.3 Hz, 1H), 7.50 (t, *J* = 7.6 Hz, 1H), 7.38 (t, *J* = 7.5 Hz, 1H), 7.22 (s, 1H), 5.29 (q, *J* = 7.1 Hz, 1H), 3.98 (s, 3H), 3.11 (s, 9H), 1.85 (d, *J* = 7.0 Hz, 3H); <sup>13</sup>C NMR (151 MHz, CDCl<sub>3</sub>, major rotamer) δ 154.8, 135.3, 130.7, 128.7, 128.5, 128.1, 126.6, 125.1, 122.5, 120.7 (q, *J*<sub>C-F</sub> = 320.0 Hz), 106.8, 65.9, 56.0, 51.09, 51.07, 51.05, 15.4;<sup>17</sup> <sup>19</sup>F NMR (376.5 MHz,

CDCl<sub>3</sub>)  $\delta$  -78.4; FTIR (neat) 3048, 1634, 1474, 1260, 1163, 1031, 756, 639 cm<sup>-1</sup>; LRMS (ESI+) [M-OTf]<sup>+</sup> calculated for [C<sub>16</sub>H<sub>22</sub>NO<sup>+</sup>]: 244.2, found: 244.2.

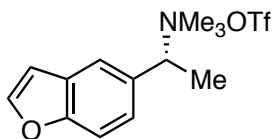

**(R)-1-(benzofuran-5-yl)-N,N,N-trimethylethanaminium trifluoromethanesulfonate (1f).** Prepared according to General Procedure D on a 6.12 mmol scale from (*R*)-1-(benzofuran-5-yl)-*N,N*-dimethylethanamine, which was prepared using Eschweiler-Clarke conditions<sup>3a</sup> from (*R*)-1-(benzofuran-5-yl)ethanamine (prepared using Ellman's auxiliary<sup>2</sup>). In this case, a white precipitate did not form upon addition of MeOTf. Instead, two distinct layers formed. The top layer was decanted off. The bottom layer was washed with Et<sub>2</sub>O (2 mL), which caused white precipitate to form. The precipitate was filtered and washed with Et<sub>2</sub>O (3 x 15 mL) and dried under high vacuum to afford salt **1f** (2.076 g, 96%) as a white solid (mp 106–108 °C): <sup>1</sup>H NMR (600 MHz, CDCl<sub>3</sub>)  $\delta$  7.81 (s, 1H), 7.68 (d, *J* = 2.1 Hz, 1H), 7.55 (d, *J* = 8.5 Hz, 1H), 7.41 (d, *J* = 8.2 Hz, 1H), 6.85 – 6.81 (m, 1H), 4.98 (q, *J* = 7.0 Hz, 1H), 3.13 (s, 9H), 1.85 (d, *J* = 6.9 Hz, 3H); <sup>13</sup>C NMR (151 MHz, CDCl<sub>3</sub>)  $\delta$  155.8, 146.9, 128.5, 127.1, 120.9 (q, *J*<sub>C-F</sub> = 320.1 Hz), 112.4, 107.0, 74.4, 51.18, 51.15, 51.1, 15.5;<sup>17</sup> <sup>19</sup>F NMR (565 MHz, CDCl<sub>3</sub>)  $\delta$  -78.4; FTIR (neat) 3042, 1472, 1263, 1158, 1030, 838, 750, 639, 518 cm<sup>-1</sup>; LRMS (ESI+) [M-OTf]<sup>+</sup> calculated for [C<sub>13</sub>H<sub>18</sub>NO<sup>+</sup>]: 204.1, found: 204.2.

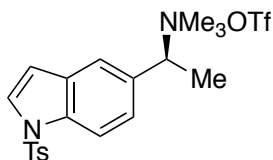

**(S)-N,N,N-trimethyl-1-(1-tosyl-1H-indol-5-yl)ethanaminium trifluoromethanesulfonate (1g).** Prepared according to General Procedure D on a 2.97 mmol scale from (*S*)-*N,N*-dimethyl-1-(1-tosyl-1H-indol-5-yl)ethanamine, which was

prepared using Eschweiler-Clarke conditions<sup>3a</sup> from (*S*)-1-(1-tosyl-1*H*-indol-5-yl)ethanamine (prepared using Ellman's auxiliary<sup>2</sup>) to afford salt **1g** (1.277 g, 85%) as a white solid (mp 73-75 °C); <sup>1</sup>H NMR (600 MHz, CDCl<sub>3</sub>) δ 8.01 (d, *J* = 8.6 Hz, 1H), 7.79 – 7.73 (m, 3H), 7.62 (d, *J* = 3.7 Hz, 1H), 7.42 (d, *J* = 8.6 Hz, 1H), 7.25 (s, 1H), 6.71 (d, *J* = 3.6 Hz, 1H), 4.91 (q, *J* = 6.9 Hz, 1H), 3.09 (s, 9H), 2.34 (s, 3H), 1.80 (d, *J* = 6.9 Hz, 3H); <sup>13</sup>C NMR (151 MHz, CDCl<sub>3</sub>) δ 145.8, 135.6, 135.0, 131.3, 130.4, 128.0, 127.4, 127.1, 120.9 (q, *J*<sub>C-F</sub> = 320.12 Hz), 114.2, 109.1, 74.3, 51.2, 21.8, 15.4; <sup>19</sup>F NMR (565 MHz, CDCl<sub>3</sub>) δ –78.4; FTIR (neat) 3051, 1464, 1373, 1273, 1175, 1031, 639, 581 cm<sup>-1</sup>; LRMS (ESI+) [M-OTf]<sup>+</sup> calculated for [C<sub>20</sub>H<sub>25</sub>N<sub>2</sub>O<sub>2</sub>S<sup>+</sup>]: 357.2, found: 357.3.

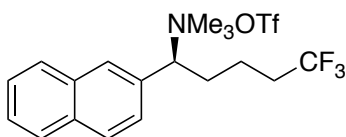

**(*S*)-5,5,5-trifluoro-*N,N,N*-trimethyl-1-(naphthalen-2-yl)pentan-1-aminium**

**trifluoromethanesulfonate (1h).** Prepared according to General Procedure D on a 3.47 mmol scale from (*S*)-5,5,5-trifluoro-*N,N*-dimethyl-1-(naphthalen-2-yl)pentan-1-amine, which was prepared using Eschweiler-Clarke conditions<sup>3a</sup> from (*S*)-5,5,5-trifluoro-1-(naphthalen-2-yl)pentan-1-amine (prepared using Ellman's auxiliary<sup>2</sup>). In this case, a precipitate did not form upon addition of MeOTf. Instead, two distinct layers were observed. The top layer was decanted. The bottom layer was washed with a 1:1 (v/v) solution of Et<sub>2</sub>O/hexanes (5 x 4 mL) and dried under high vacuum at 50 °C to afford salt **1h** (1.492 g, 94%) as a sticky solid: <sup>1</sup>H NMR (600 MHz, CDCl<sub>3</sub>) δ 8.15 – 7.88 (m, 3H), 7.86 (d, *J* = 8.2 Hz, 1H), 7.64 – 7.44 (m, 3H), 4.87 – 4.76 (m, 1H), 3.16 (s, 9H), 2.41 (s, 2H), 2.29 – 2.03 (m, 2H), 1.53 – 1.36 (m, 1H), 1.32 – 1.13 (m, 1H); <sup>13</sup>C NMR (101 MHz, CDCl<sub>3</sub>) δ 135.0, 134.1, 133.1, 130.0, 129.6, 128.7, 128.2, 127.9, 127.5, 126.9 (q, *J*<sub>C-F</sub> = 277.5 Hz), 122.9, 120.7 (q, *J*<sub>C-F</sub> = 320.1 Hz), 78.7, 51.8, 32.8 (q, *J*<sub>C-F</sub> = 29.0 Hz) 26.3, 19.2; <sup>19</sup>F NMR (565 MHz, CDCl<sub>3</sub>) δ –78.4, –66.2; FTIR (neat) 3053, 2957, 1491, 1260, 1154, 1031, 831, 639 cm<sup>-1</sup>; LRMS (ESI+) [M-OTf]<sup>+</sup> calculated for [C<sub>18</sub>H<sub>23</sub>F<sub>3</sub>N<sup>+</sup>]: 310.2, found: 310.4. Two-dimensional NMR experiments were used to verify <sup>1</sup>H and <sup>13</sup>C assignments due to the complex nature of the spectra.

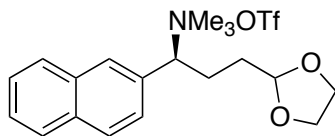

**(S)-3-(1,3-dioxolan-2-yl)-N,N,N-trimethyl-1-(naphthalen-2-yl)propan-1-aminium trifluoromethanesulfonate (1i).** Prepared according to General Procedure D on a 1.93 mmol scale from (S)-3-(1,3-dioxolan-2-yl)-N,N-dimethyl-1-(naphthalen-2-yl)propan-1-amine, which was prepared by reductive amination<sup>3b</sup> from (S)-3-(1,3-dioxolan-2-yl)-1-(naphthalen-2-yl)propan-1-amine (prepared using Ellman's auxiliary<sup>2</sup>). In this case, a white precipitate did not form upon addition of MeOTf. Instead, two distinct layers formed. The top layer was decanted off. The bottom layer was washed with Et<sub>2</sub>O (5 x 2 mL) and then hexanes (5 x 2 mL, HPLC grade) and then dried under high vacuum to give salt **1i** (0.854 g, 98%) as a sticky white solid: <sup>1</sup>H NMR (600 MHz, CDCl<sub>3</sub>) δ 8.15 – 7.89 (m, 3H), 7.86 (d, *J* = 7.9 Hz, 1H), 7.63 – 7.41 (m, 3H), 4.89 – 4.83 (m, 1H), 4.81 (t, *J* = 4.0 Hz, 1H), 3.97 – 3.86 (m, 2H), 3.82 – 3.63 (m, 2H. Please note: this peak is contaminated with an unknown impurity. At 50 °C the peak corresponding to the impurity shifts and an accurate integration of two protons is obtained), 3.17 (s, 9H), 2.50 – 2.29 (m, 2H), 1.60 – 1.24 (m, 2H); <sup>1</sup>H NMR (400 MHz, CDCl<sub>3</sub>, 50 °C) δ 8.14 – 7.99 (m, 1H), 7.99 – 7.90 (m, 2H), 7.90 – 7.82 (m, 1H), 7.62 – 7.46 (m, 3H), 4.97 – 4.74 (m, 2H), 4.00 – 3.67 (m, 4H), 3.18 (s, 9H), 2.59 – 2.26 (m, 2H), 1.61 – 1.29 (m, 2H); <sup>13</sup>C NMR (101 MHz, CDCl<sub>3</sub>) δ 135.2, 134.1, 133.1, 129.9, 129.5, 128.8, 128.1, 127.8, 127.4, 123.0, 120.8 (q, *J*<sub>C-F</sub> = 321.1 Hz), 102.8, 78.9, 65.1, 65.0, 51.8, 30.0; <sup>19</sup>F NMR (565 MHz, CDCl<sub>3</sub>) δ –78.3; FTIR (neat) 3054, 2890, 1489, 1264, 1159, 1031, 830, 639, 518 cm<sup>-1</sup>; LRMS (ESI+) [M-OTf]<sup>+</sup> calculated for [C<sub>19</sub>H<sub>26</sub>NO<sub>2</sub>]<sup>+</sup>: 300.2, found: 300.3. Two-dimensional NMR experiments were used to verify <sup>1</sup>H and <sup>13</sup>C assignments due to the complex nature of the spectra.

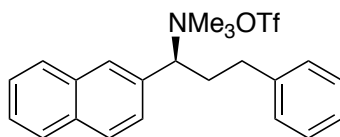

**(S)-N,N,N-trimethyl-1-(naphthalen-2-yl)-3-phenylpropan-1-aminium**

**trifluoromethanesulfonate (1j).** Prepared according to General Procedure D on a 1.93 mmol scale from (S)-N,N-dimethyl-1-(naphthalen-2-yl)-3-phenylpropan-1-amine, which was prepared using Eschweiler-Clarke conditions<sup>3a</sup> from (S)-3-(1,3-dioxolan-2-yl)-1-(naphthalen-2-yl)propan-1-amine (prepared using Ellman's auxiliary<sup>2</sup>). In this case, a white precipitate did not form upon addition of MeOTf. Instead, two distinct layers formed. The top layer was decanted off. The bottom layer was washed with Et<sub>2</sub>O (5 x 2 mL) and then hexanes (5 x 2 mL, HPLC grade) and then dried under high vacuum to give salt **1j** (0.854 g, 98%) as a beige solid that slowly turned yellow (mp 65–68°C): <sup>1</sup>H NMR (600 MHz, CDCl<sub>3</sub>) δ 8.07 – 7.92 (m, 3H), 7.90 (d, *J* = 7.8 Hz, 1H), 7.64 – 7.56 (m, 2H), 7.53 (s, 1H), 7.22 (t, *J* = 7.5 Hz, 2H), 7.14 (t, *J* = 7.3 Hz, 1H), 7.05 (d, *J* = 7.3 Hz, 2H), 4.78 – 4.65 (m, 1H. Please note: this peak is contaminated with an unknown impurity; however at 50 °C the peak corresponding to the impurity shifts and a more accurate integration is obtained.), 3.12 (s, 9H), 2.60 (d, *J* = 6.7 Hz, 2H), 2.49 – 2.27 (m, 2H); <sup>1</sup>H NMR (400 MHz, CDCl<sub>3</sub>, 50 °C) δ 8.05 (s, 1H), 8.02 – 7.93 (m, 2H), 7.93 – 7.87 (m, 1H), 7.64 – 7.55 (m, 2H), 7.55 – 7.50 (m, 1H), 7.25 – 7.18 (m, 2H), 7.17 – 7.11 (m, 1H), 7.08 – 7.02 (m, 2H), 4.77 – 4.60 (m, 1H), 3.13 (s, 9H), 2.66 – 2.55 (m, 2H), 2.51 – 2.33 (m, 2H); <sup>13</sup>C NMR (101 MHz, CDCl<sub>3</sub>) δ 139.6, 135.1, 134.1, 133.1, 130.0, 129.5, 128.8, 128.4, 128.2, 127.9, 127.5, 127.3, 126.7, 123.0, 120.8 (q, *J*<sub>C-F</sub> = 320.9 Hz), 78.9, 51.7, 32.3, 29.3; <sup>19</sup>F NMR (565 MHz, CDCl<sub>3</sub>) δ –78.3; FTIR (neat) 3058, 2969, 1490, 1262, 1160, 1030, 829, 638 cm<sup>-1</sup>; LRMS (ESI+) [M-OTf]<sup>+</sup> calculated for [C<sub>22</sub>H<sub>26</sub>N<sup>+</sup>]: 304.2, found: 304.3. Two-dimensional NMR experiments were used to verify <sup>1</sup>H and <sup>13</sup>C assignments due to the complex nature of the spectra.

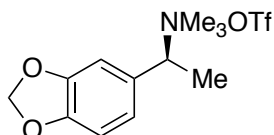

**(S)-1-(benzo[d][1,3]dioxol-5-yl)-N,N,N-trimethylethanaminium**

**trifluoromethanesulfonate (1p).** Prepared according to General Procedure D on a 1.52 mmol scale from (S)-1-(benzo[d][1,3]dioxol-5-yl)-N,N-dimethylethanamine, which was prepared using Eschweiler-Clarke conditions<sup>3a</sup> from (S)-1-(benzo[d][1,3]dioxol-5-yl)ethanamine (prepared using Ellman's auxiliary<sup>2</sup>), to afford salt **1p** (0.471 g, 87%) as an off-white solid (mp 136–138 °C); <sup>1</sup>H NMR (600 MHz, CDCl<sub>3</sub>) δ 7.01 (d, *J* = 7.8 Hz, 1H), 6.95 (s, 1H), 6.85 (d, *J* = 8.0 Hz, 1H), 6.01 (s, 2H), 4.80 (q, *J* = 7.0 Hz, 1H), 3.11 (s, 9H), 1.76 (d, *J* = 6.9 Hz, 3H); <sup>13</sup>C NMR (151 MHz, CDCl<sub>3</sub>) δ 149.8, 148.6, 125.9, 120.9 (q, *J*<sub>C-F</sub> = 320.1 Hz), 109.0, 102.1, 74.1, 51.13, 51.11, 51.08, 15.3;<sup>17</sup> <sup>19</sup>F NMR (565 MHz, CDCl<sub>3</sub>) δ -78.5; FTIR (neat) 3045, 2909, 1493, 1256, 1159, 1031, 835, 639 cm<sup>-1</sup>; LRMS (ESI+) [M-OTf]<sup>+</sup> calculated for [C<sub>12</sub>H<sub>18</sub>NO<sub>2</sub><sup>+</sup>]: 208.1, found: 208.2.

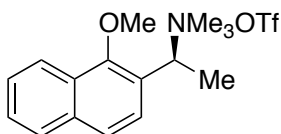

**(S)-1-(1-methoxynaphthalen-2-yl)-N,N,N-trimethylethanaminium**

**trifluoromethanesulfonate (1q)** Prepared according to General Procedure D on a 5.64 mmol scale from (S)-1-(1-methoxynaphthalen-2-yl)-N,N-dimethylethanamine, which was prepared using Eschweiler-Clarke conditions<sup>3a</sup> from (S)-1-(1-methoxynaphthalen-2-yl)ethanamine (prepared using Ellman's auxiliary<sup>2</sup>), to afford salt **1q** (2.085 g, 94%) as a white solid (mp 123–124 °C); <sup>1</sup>H NMR (600 MHz, CDCl<sub>3</sub>) δ 8.14 – 8.09 (m, 1H), 7.91 – 7.86 (m, 1H), 7.74 (d, *J* = 8.7 Hz, 1H), 7.62 – 7.58 (m, 2H), 7.50 (d, *J* = 8.7 Hz, 1H), 5.30 (q, *J* = 7.1 Hz, 1H), 4.00 (s, 3H), 3.16 (s, 9H), 1.94 (d, *J* = 7.0 Hz, 3H); <sup>13</sup>C NMR (151 MHz, CDCl<sub>3</sub>) δ 156.4, 135.9, 128.5, 128.3, 127.5, 127.4, 125.6, 124.4, 123.3, 120.94, 120.90 (q, *J*<sub>C-F</sub> = 320.1 Hz), 67.1, 63.9, 51.38, 51.36, 51.34, 15.4;<sup>17</sup> <sup>19</sup>F NMR (565 MHz, CDCl<sub>3</sub>) δ -78.4; FTIR (neat) 3051, 1471, 1272, 1158, 1031, 827, 639 cm<sup>-1</sup>; LRMS (ESI+) [M-OTf]<sup>+</sup> calculated for [C<sub>16</sub>H<sub>22</sub>NO<sup>+</sup>]: 244.2, found: 244.2.



## References

1. Pangborn, A. B.; Giardello, M. A.; Grubbs, R. H.; Rosen, R. K.; Timmers, F. J. *Organometallics* **1996**, *15*, 1518.
2. (a) Procopiou, G.; Lewis, W.; Harbottle, G.; Stockman, R. A. *Org. Lett.* **2013**, *15*, 2030; (b) Aggarwal, V. K.; Barbero, N.; McGarrigle, E. M.; Mickle, G.; Navas, R.; Suarez, R.; Unthank, M. G.; Yar, M. *Tetrahedron Lett.* **2009**, *50*, 3482; (c) Tanuwidjaja, J.; Peltier, H. M.; Ellman, J. A. *J. Org. Chem.* **2007**, *72*, 626.
3. (a) Icke, R. N.; Wisegarver, B. B.; Alles, G. A. *Org. Synth.* **1955**, *Coll. Vol. 3*, 723; (b) Borch, R. F.; Hassid, A. I. *J. Org. Chem.* **1972**, *37*, 1673.
4. In some cases, the benzylic carbon is not observed to quadrupolar broadening caused by  $^{11}\text{B}$ .
5. Noh, D.; Chea, H.; Ju, J.; Yun, J. *Angew. Chem., Int. Ed.* **2009**, *48*, 6062.
6. Ren, X.; Li, G.; Wei, S.; Du, H. *Org. Lett.* **2015**, *17*, 990.
7. Crudden, C. M.; Hleba, Y. B.; Chen, A. C. *J. Am. Chem. Soc.* **2004**, *126*, 9200.
8. Yadav, J. S.; Nanda, S.; Reddy, P. T.; Rao, A. B. *J. Org. Chem.* **2002**, *67*, 3900.
9. Legouin, B.; Gayral, M.; Uriac, P.; Cupif, J.-F.; Levoine, N.; Toupet, L.; van de Weghe, P. *Eur. J. Org. Chem.* **2010**, *2010*, 5503.
10. Liu, Y.; Da, C.-S.; Yu, S.-L.; Yin, X.-G.; Wang, J.-R.; Fan, X.-Y.; Li, W.-P.; Wang, R. *J. Org. Chem.* **2010**, *75*, 6869.
11. El-Shehawey, A. A.; Sugiyama, K.; Hirao, A. *Tetrahedron Asym.* **2008**, *19*, 425.
12. Li, H.; Wang, L.; Zhang, Y.; Wang, J. *Angew. Chem., Int. Ed.* **2012**, *51*, 2943.
13. Wei, S.; Du, H. *J. Am. Chem. Soc.* **2014**, *136*, 12261.
14. Balieu, S.; Hallett, G. E.; Burns, M.; Bootwicha, T.; Studley, J.; Aggarwal, V. K. *J. Am. Chem. Soc.* **2015**, *137*, 4398.
15. Zuo, Z.; Zhang, L.; Leng, X.; Huang, Z. *Chem. Commun.* **2015**, *51*, 5073.
16. (a) Maity, P.; Shacklady-McAtee, D. M.; Yap, G. P. A.; Sirianni, E. R.; Watson, M. P. *J. Am. Chem. Soc.* **2013**, *135*, 280; (b) Shacklady-McAtee, D. M.; Roberts, K. M.; Basch, C. H.; Song, Y.-G.; Watson, M. P. *Tetrahedron* **2014**, *70*, 4257.
17. In several of the ammonium triflates, the methyl groups of the  $\text{NMe}_3$  fragment appear as three, nearly coincident peaks. We hypothesize that this may be due to hindered rotation about the benzylic C–N bond. rotation.

1.17  
1.21  
1.22  
1.23  
1.45  
1.47

2.62  
2.63  
2.65  
2.67

7.39  
7.39  
7.40  
7.42  
7.43  
7.43  
7.45  
7.46  
7.47  
7.67  
7.76  
7.78  
7.79  
7.80  
7.81

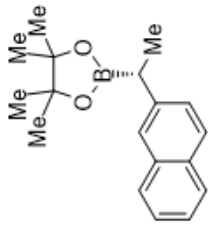

Compound 2a, <sup>1</sup>H-NMR

S34

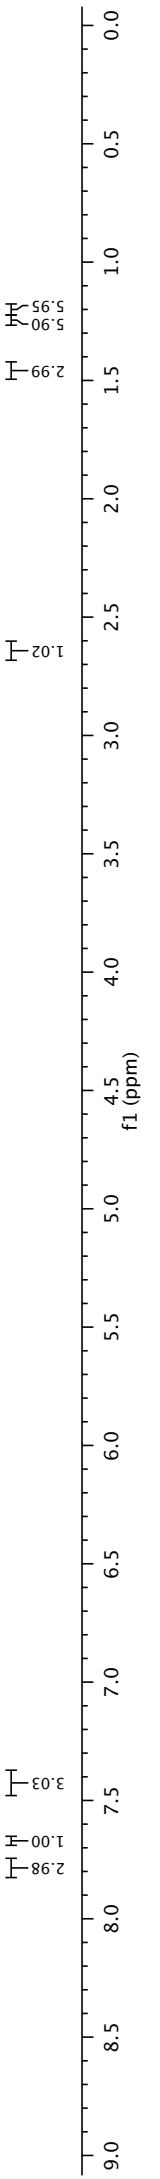

16.99  
24.80  
24.76

83.53

124.92  
125.40  
125.80  
127.38  
127.62  
127.67  
127.82  
131.84  
133.99

142.69

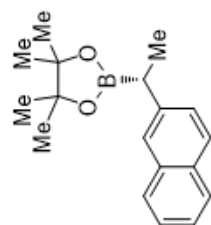Compound 2a, <sup>13</sup>C-NMR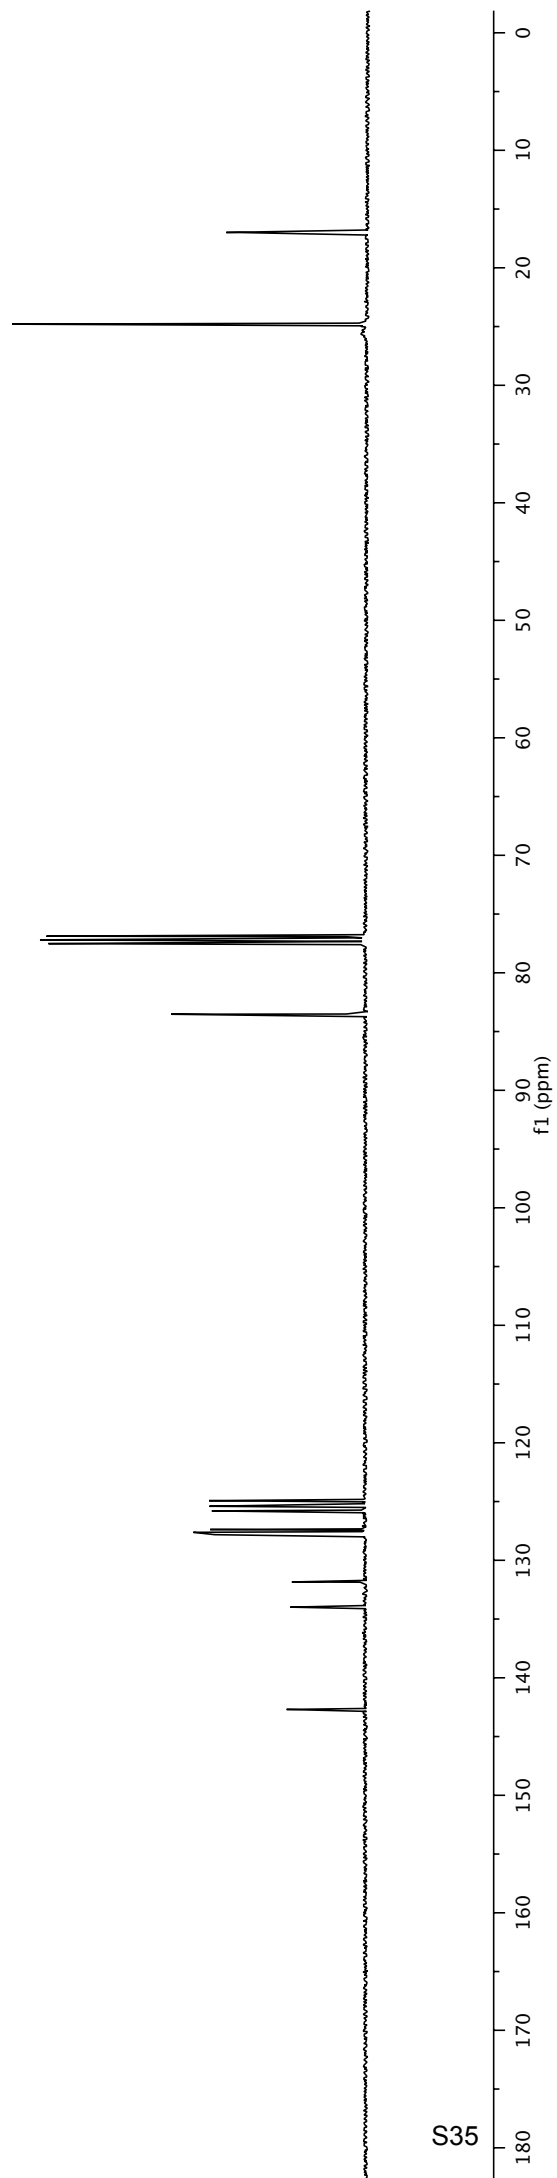

1.14  
1.15  
1.16  
1.17  
1.21  
1.22  
1.23  
1.51  
1.53

3.12  
3.13  
3.15  
3.17

7.40  
7.41  
7.42  
7.43  
7.45  
7.46  
7.48  
7.49  
7.50  
7.50  
7.52  
7.52  
7.68  
7.70  
7.84  
7.85  
7.87  
8.12  
8.14

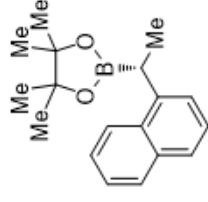

Compound 2b, <sup>1</sup>H-NMR

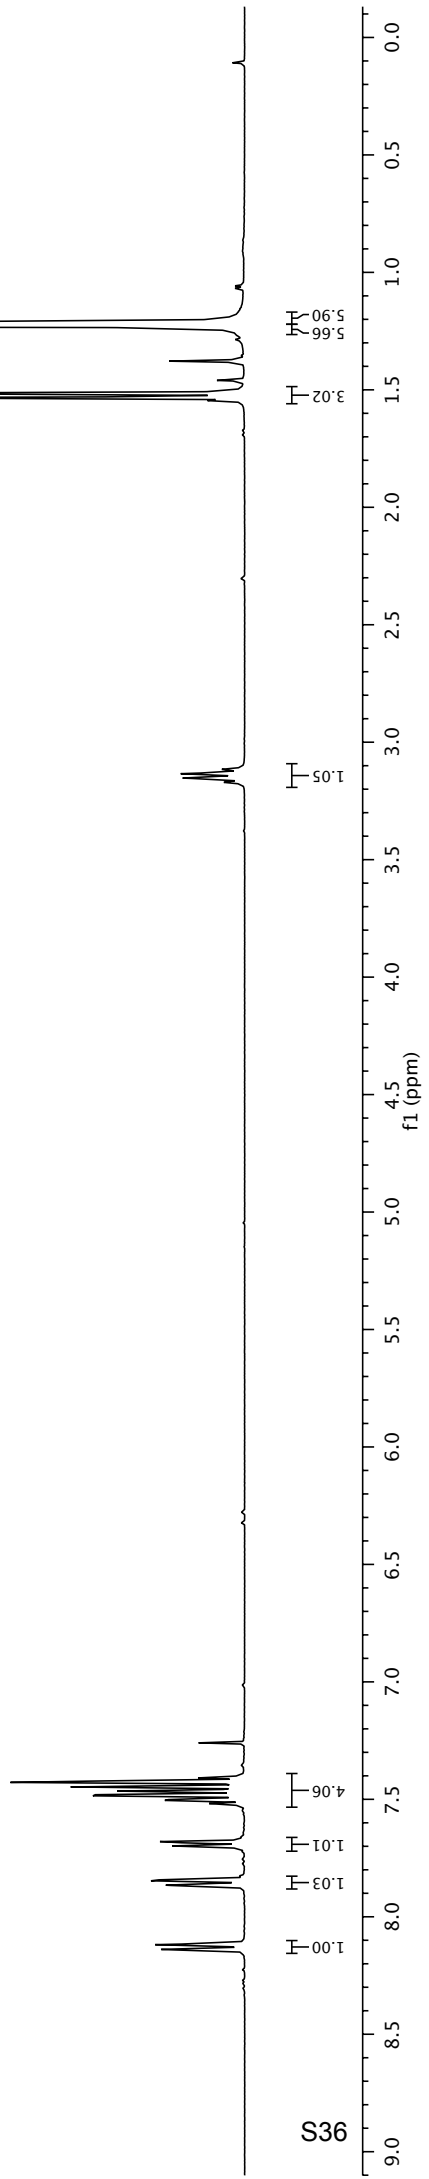

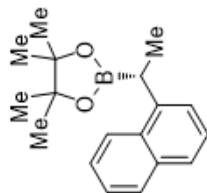

Compound 2b, <sup>13</sup>C-NMR

16.57  
24.70  
24.84

83.60

124.20  
124.39  
125.37  
125.52  
126.00  
128.89  
132.13  
134.05

141.54

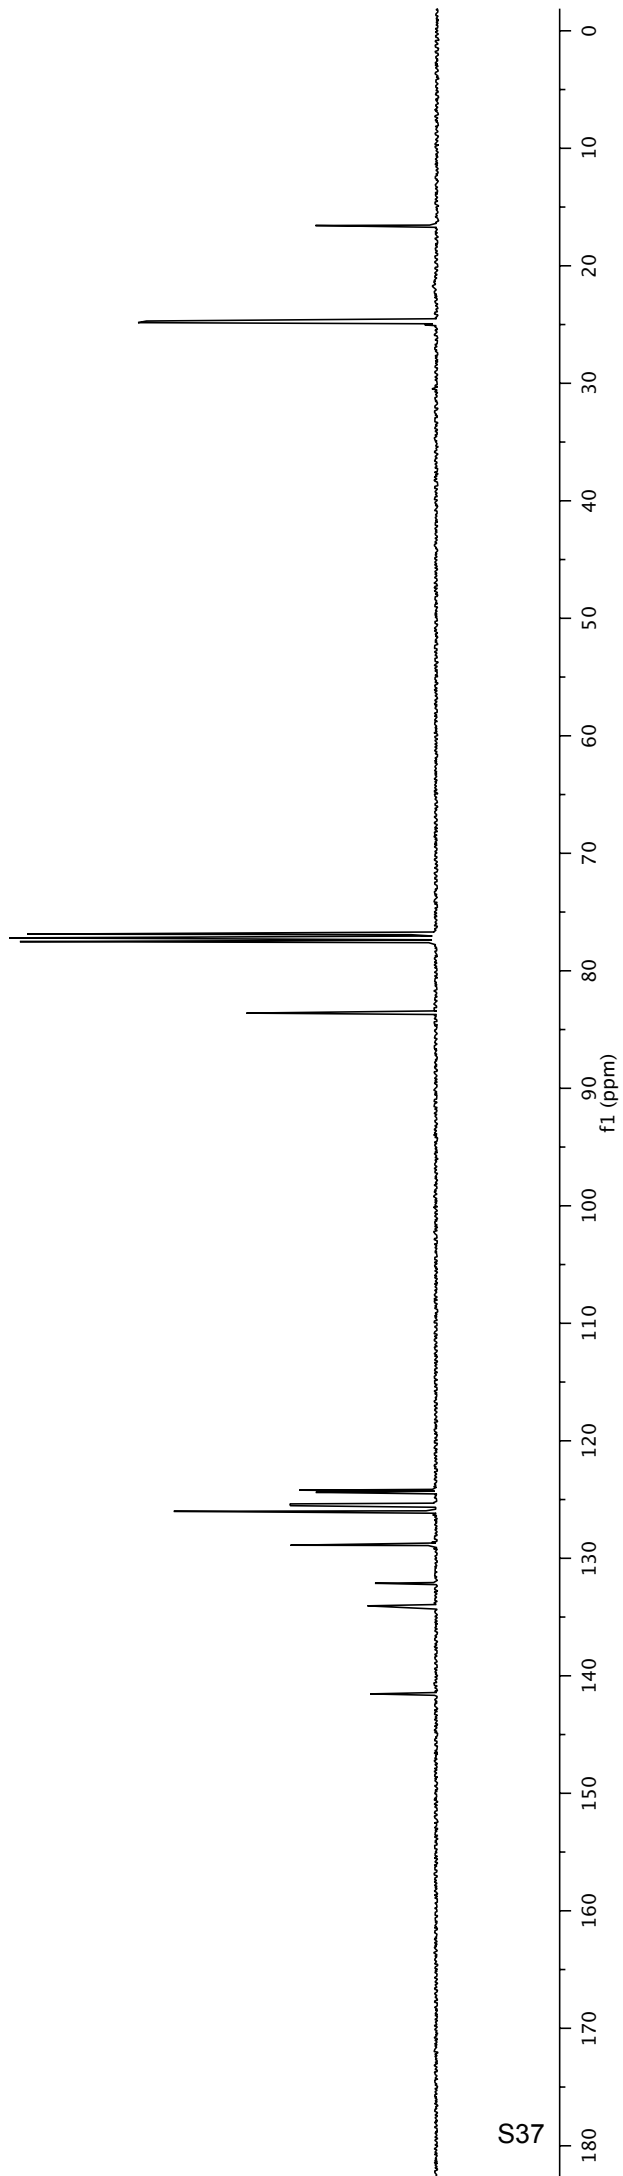

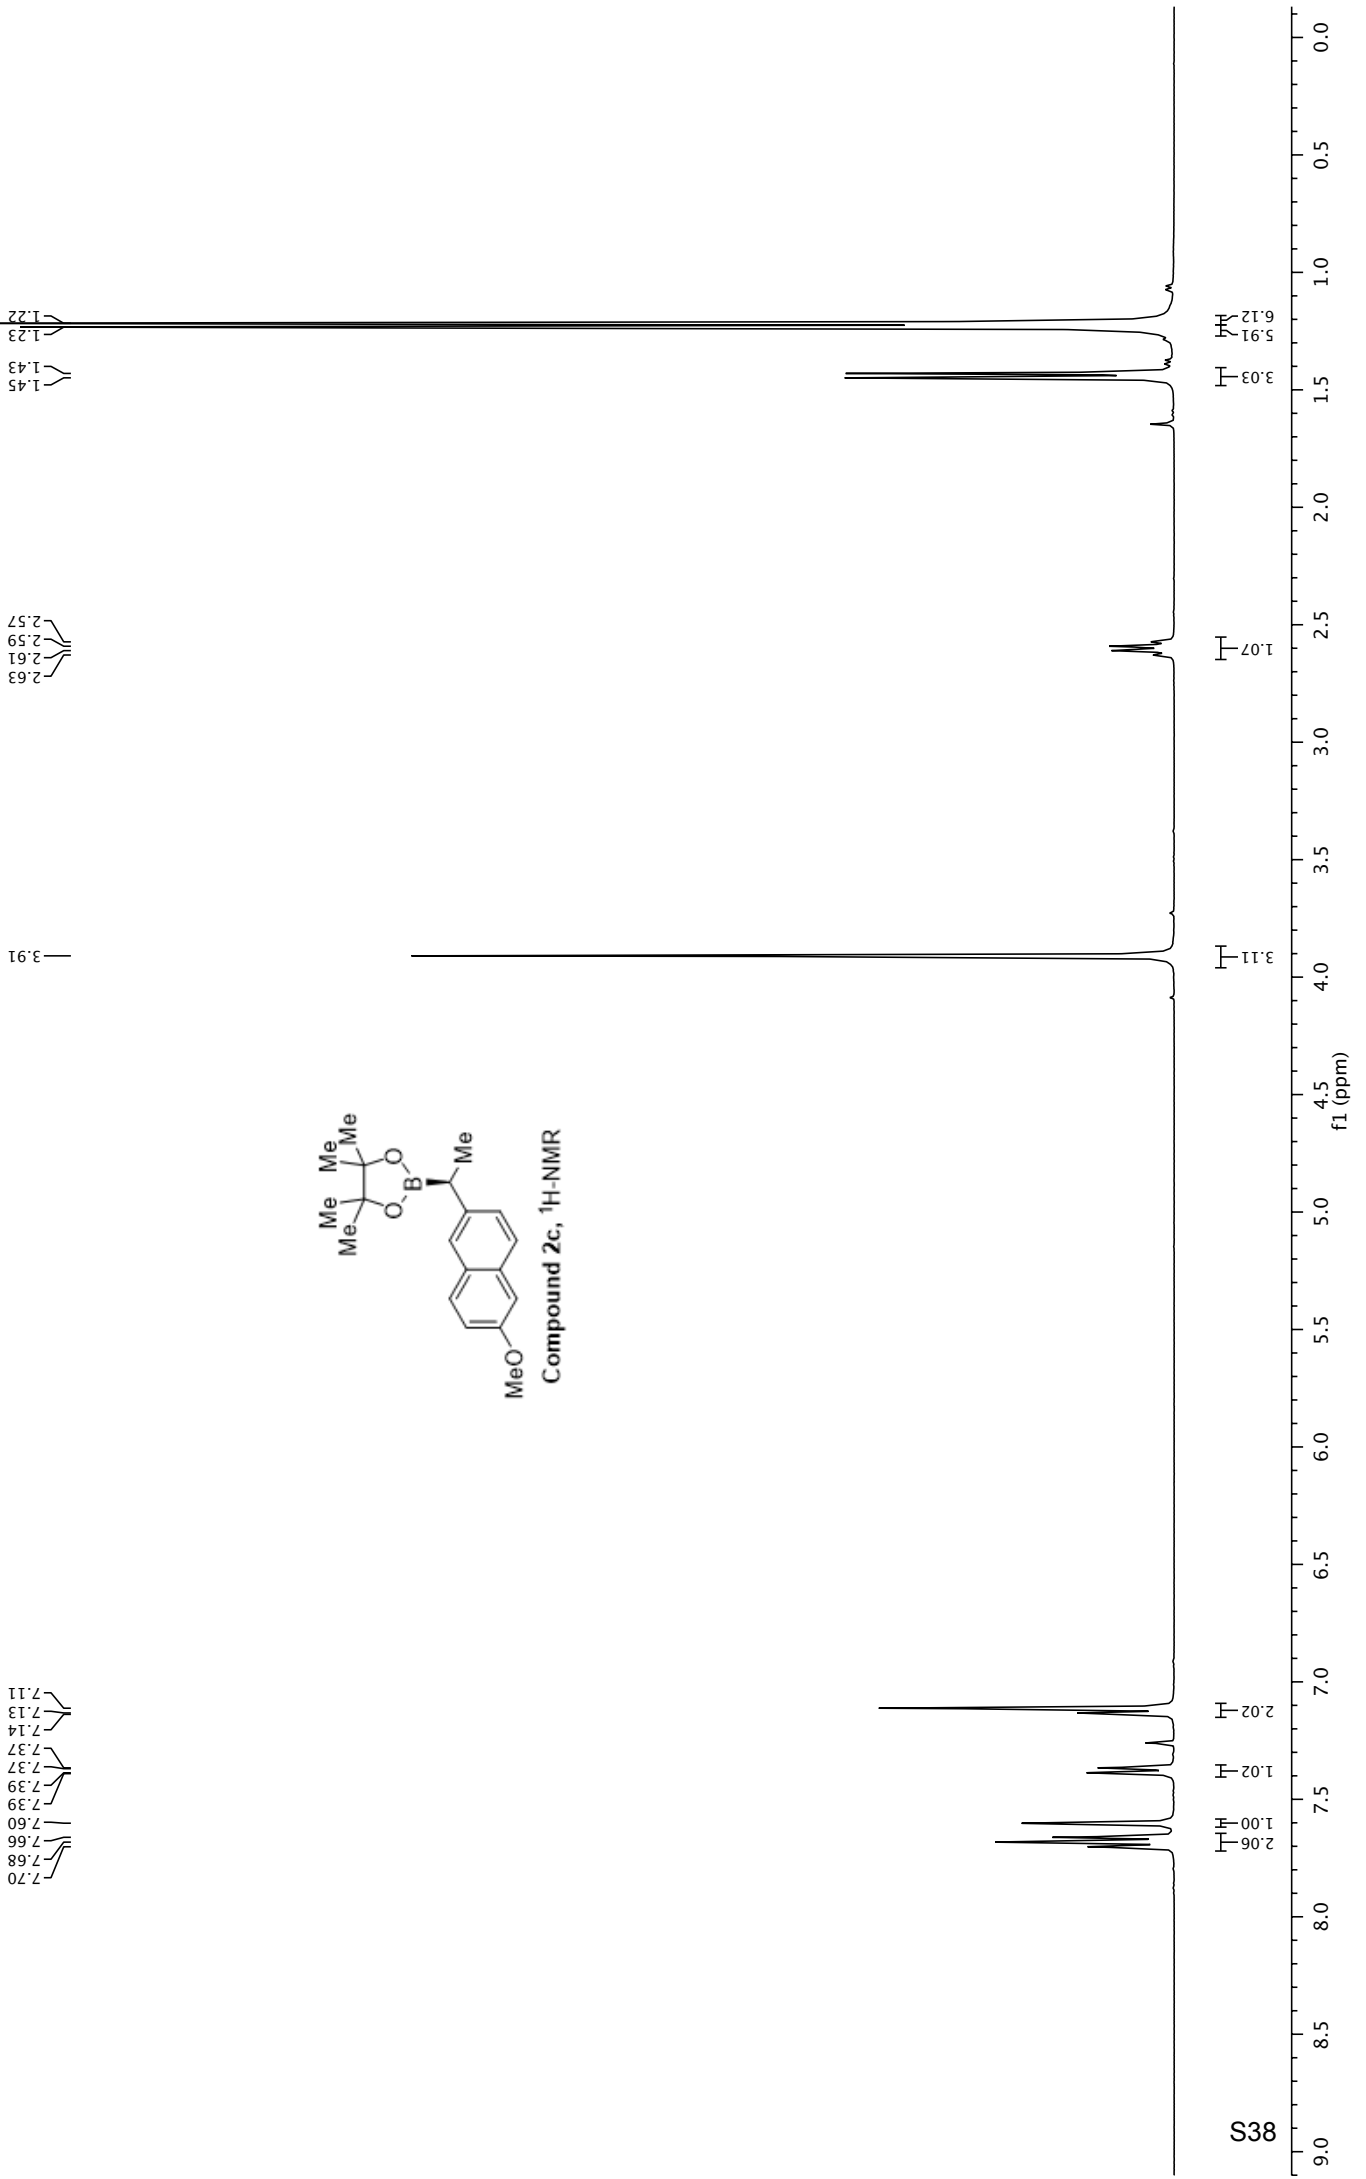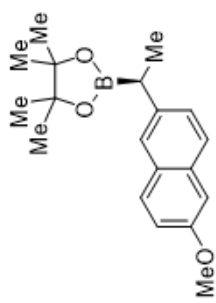

Compound 2c, <sup>1</sup>H-NMR

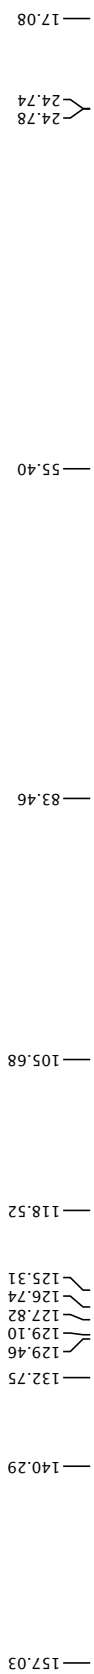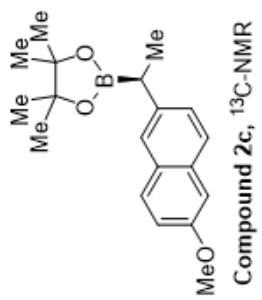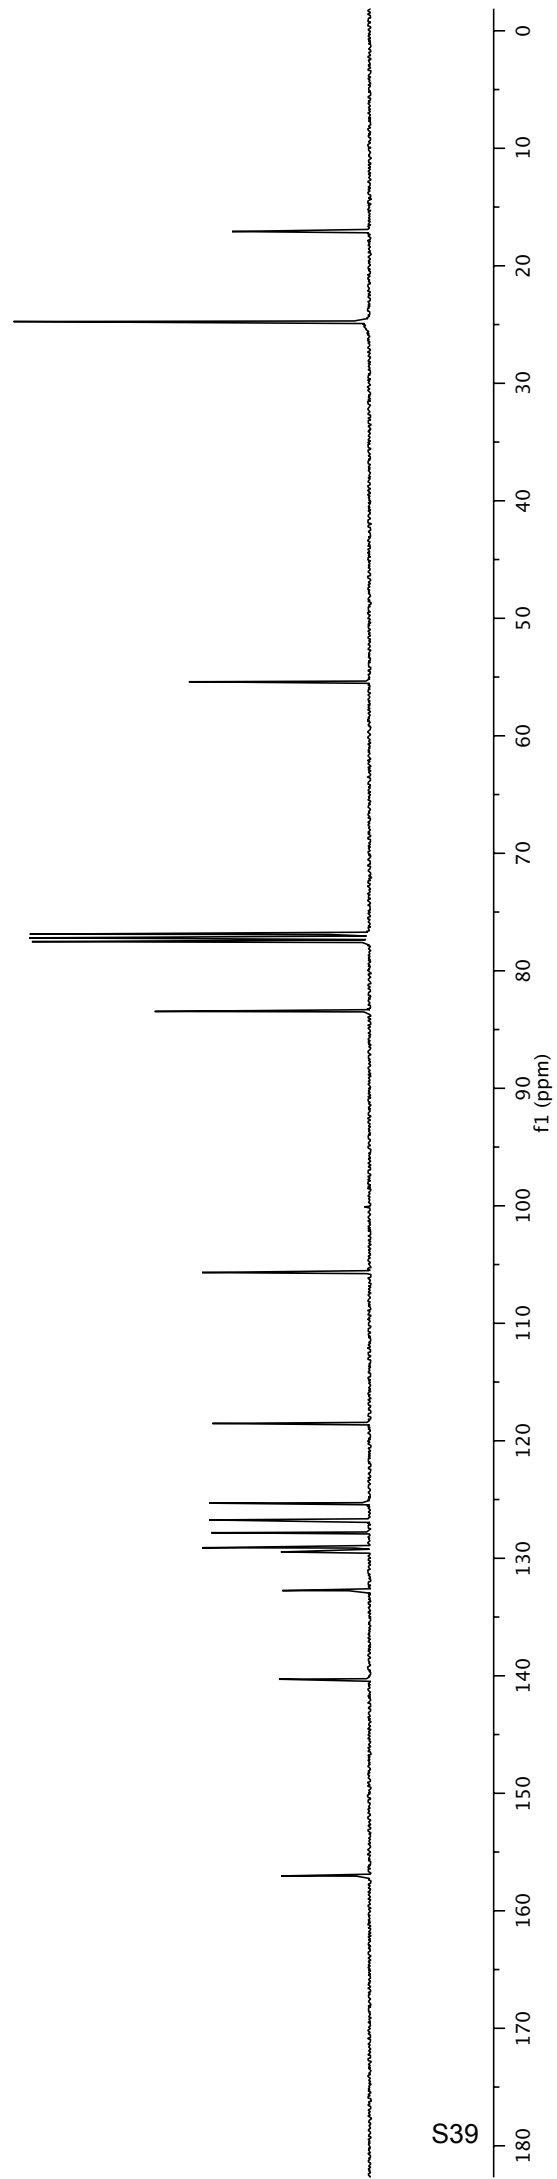

1.43  
1.41  
1.25  
1.23  
1.18

2.50  
2.58  
2.56  
2.55

7.82  
7.81  
7.80  
7.60  
7.57  
7.56  
7.48  
7.46  
7.45  
7.44  
7.42  
7.40  
7.38  
7.38  
7.31  
7.30  
7.28  
7.28  
7.08  
7.05  
7.05

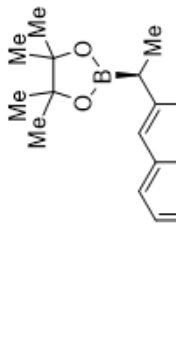

Compound 2d, <sup>1</sup>H-NMR

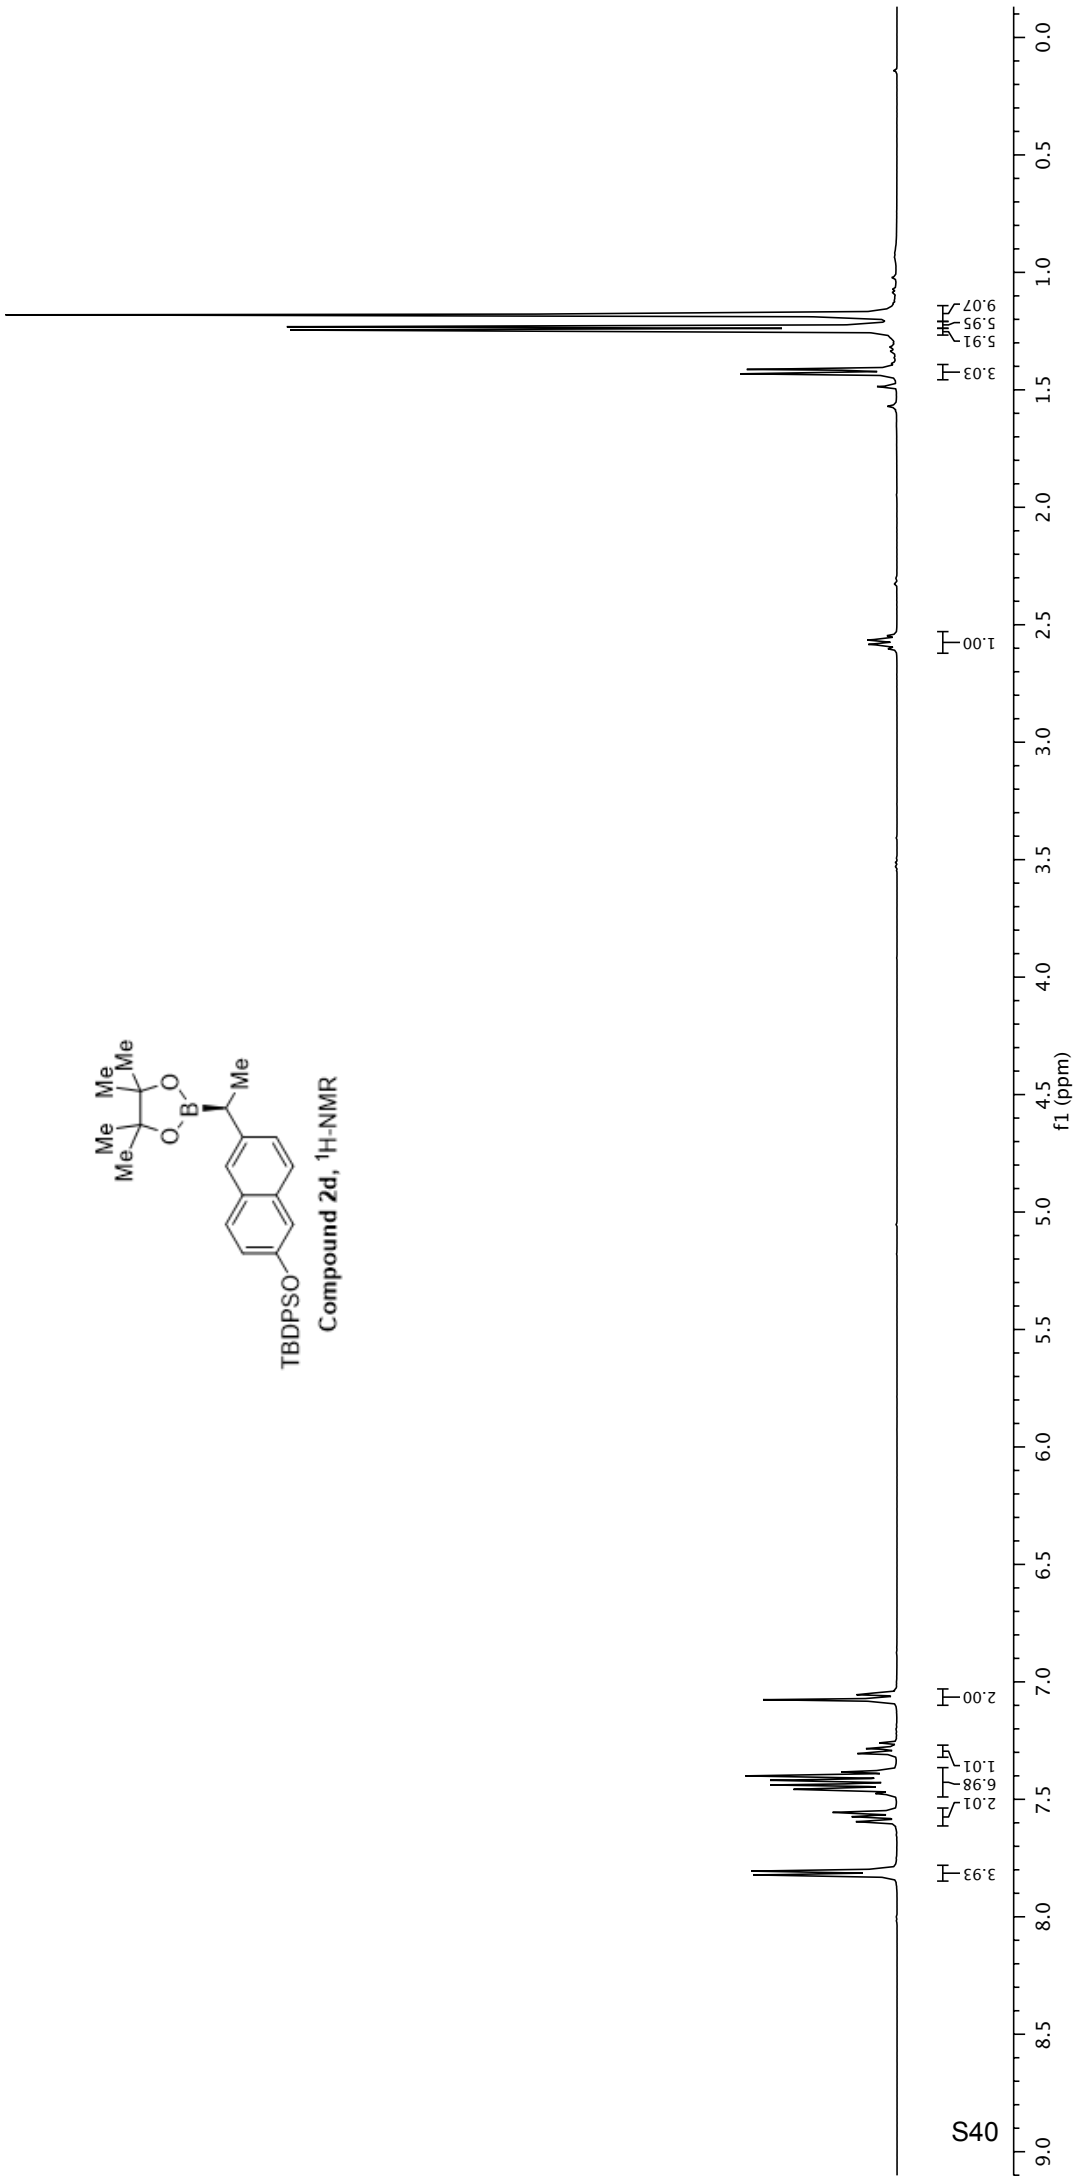



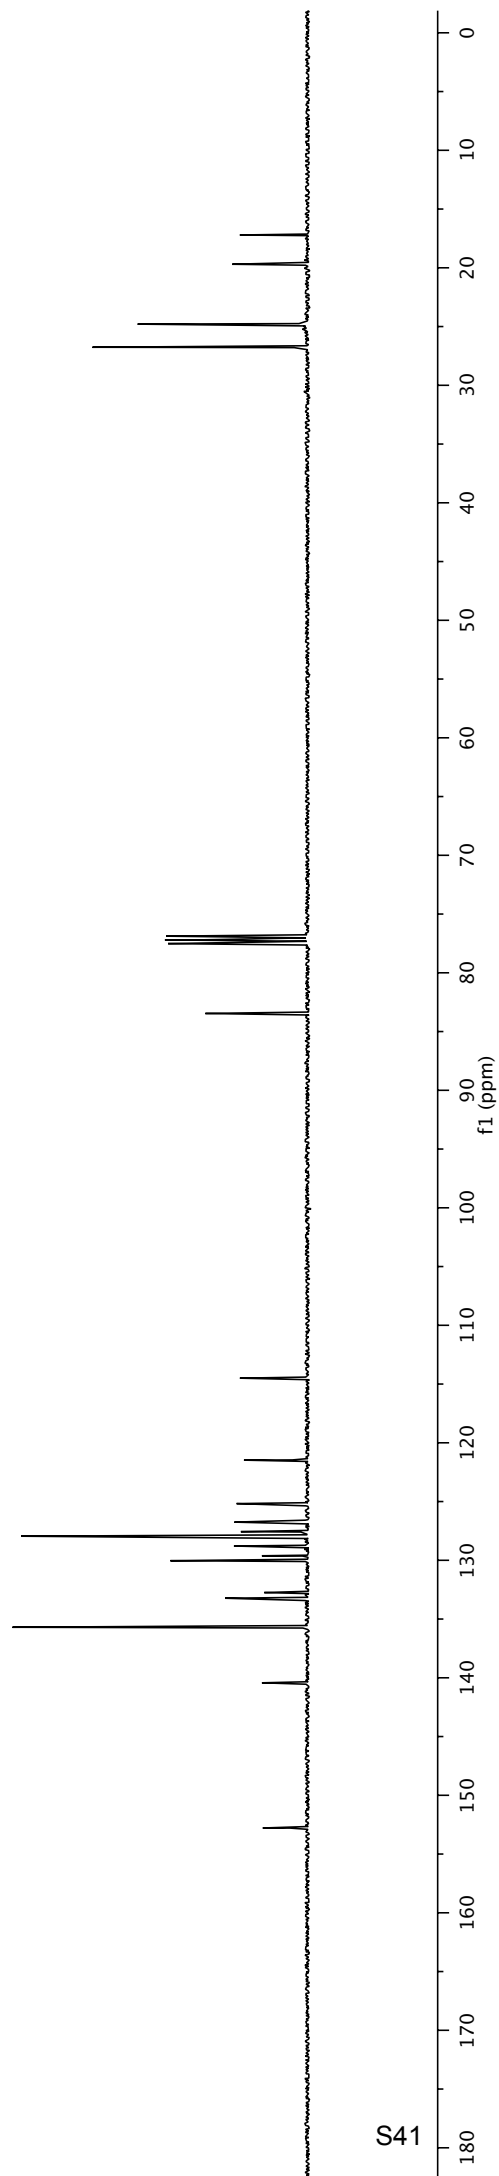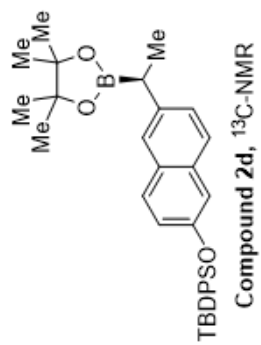

— 17.21  
— 19.70  
— 24.79  
— 24.82  
— 26.76

— 83.46

— 114.50

— 121.47  
— 125.18  
— 126.75  
— 127.56  
— 127.95  
— 128.78  
— 129.62  
— 130.03  
— 132.74  
— 133.23  
— 135.70

— 140.43

— 152.78

7.75  
7.73  
7.71  
7.60  
7.40  
7.40  
7.38  
7.38  
7.36  
7.36  
7.33  
7.33  
7.33  
7.32  
7.31  
7.31  
7.30  
7.29  
7.08

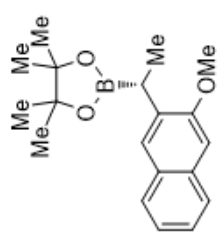

Compound 2e, <sup>1</sup>H-NMR

2.65  
2.64  
2.62  
2.60  
1.44  
1.43  
1.26

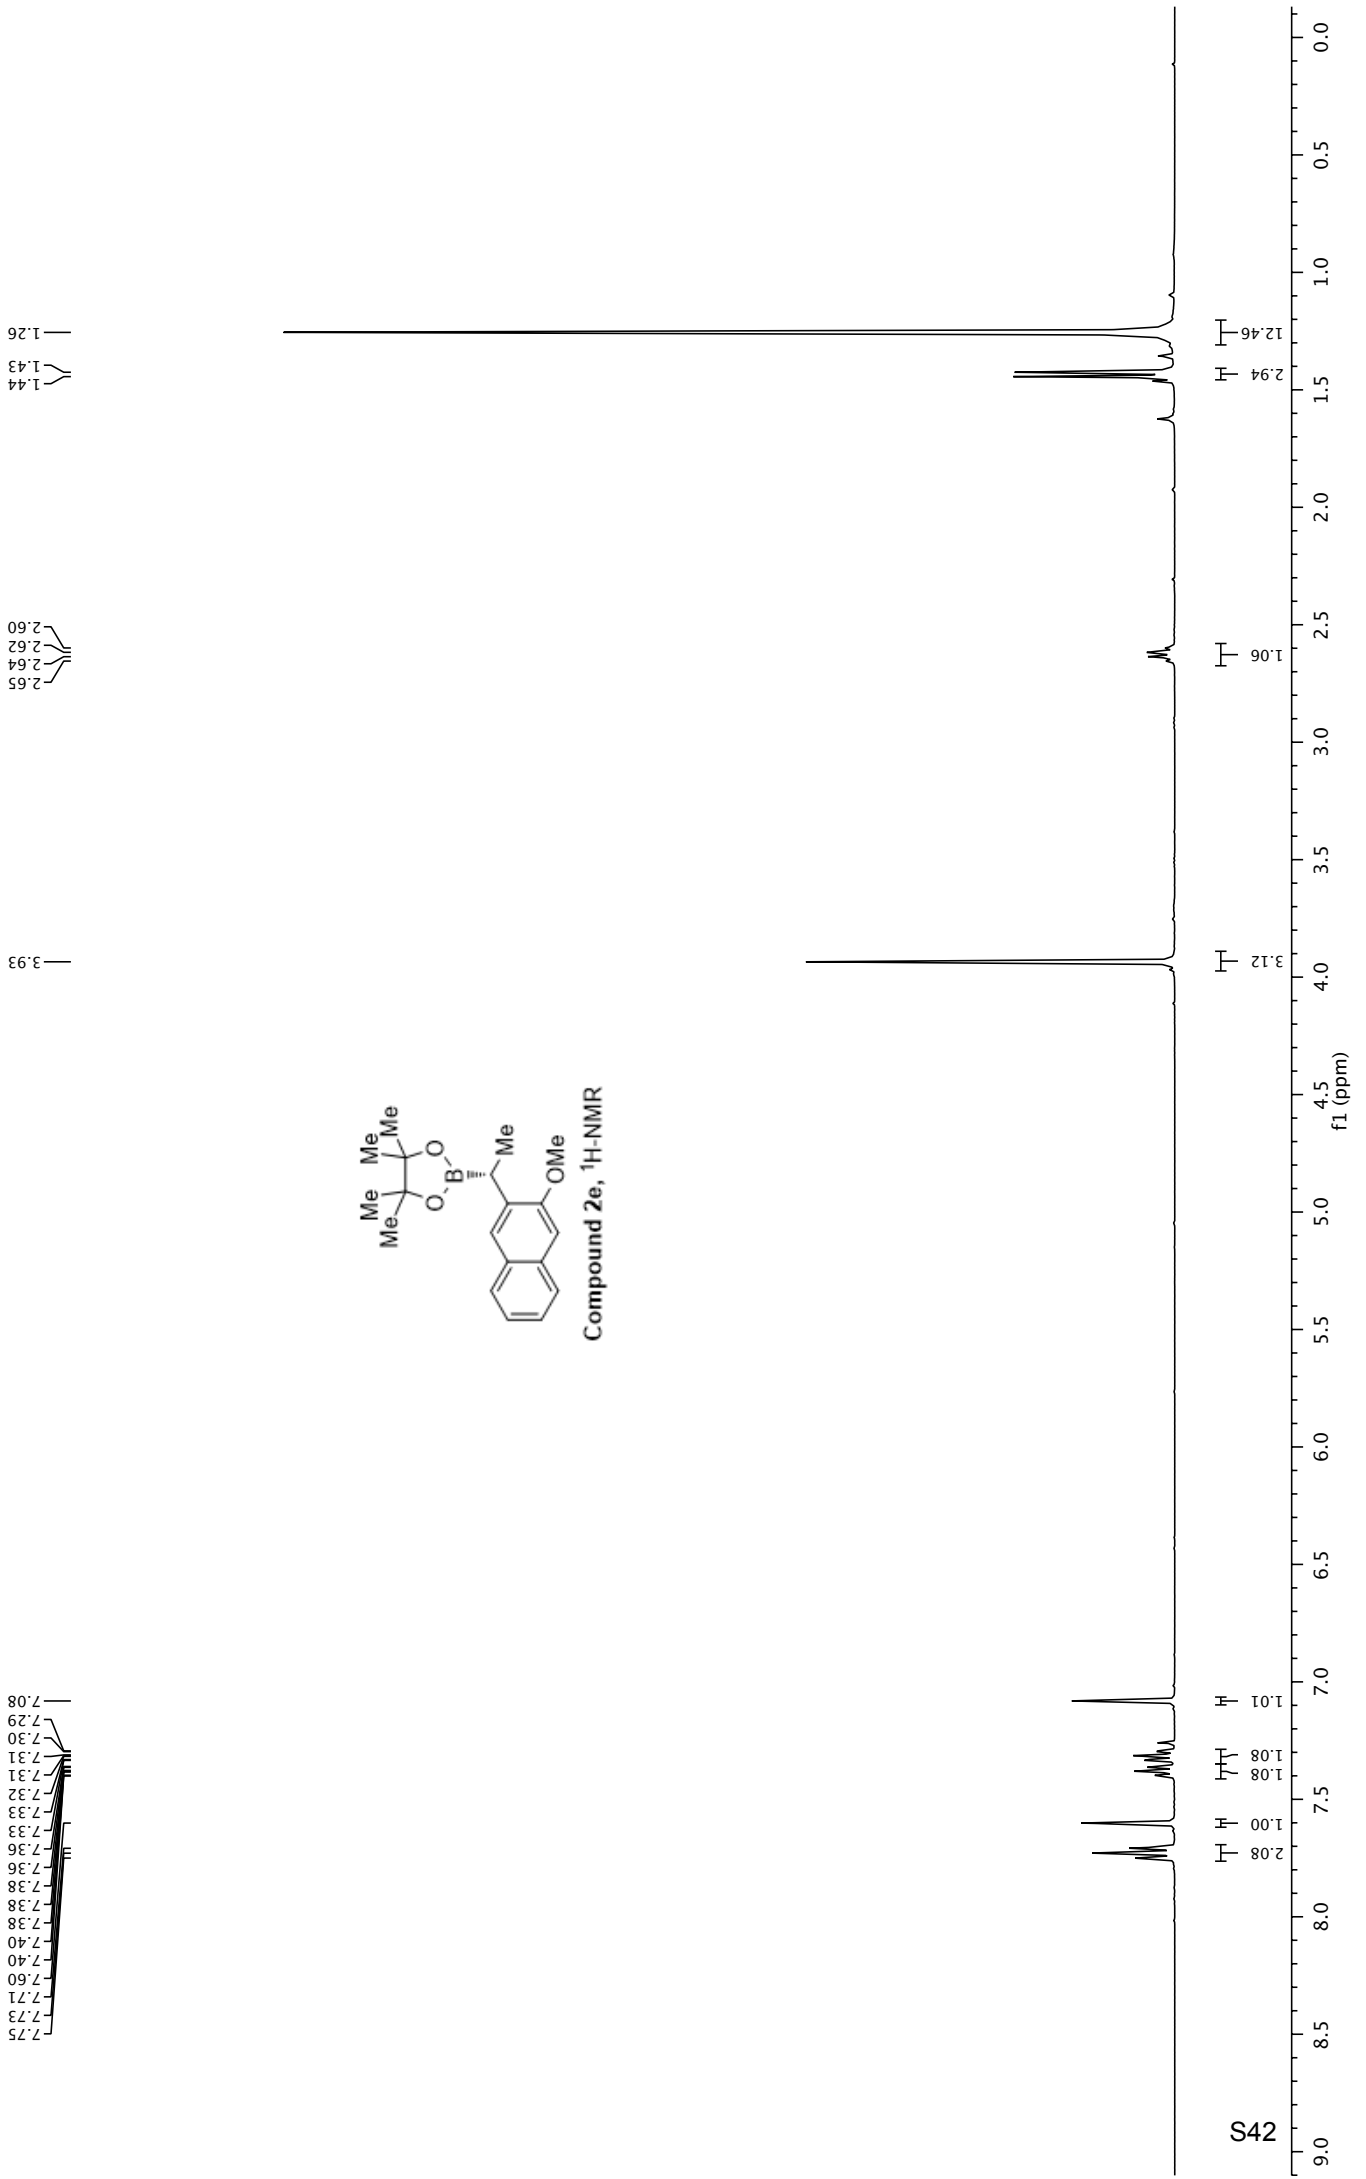

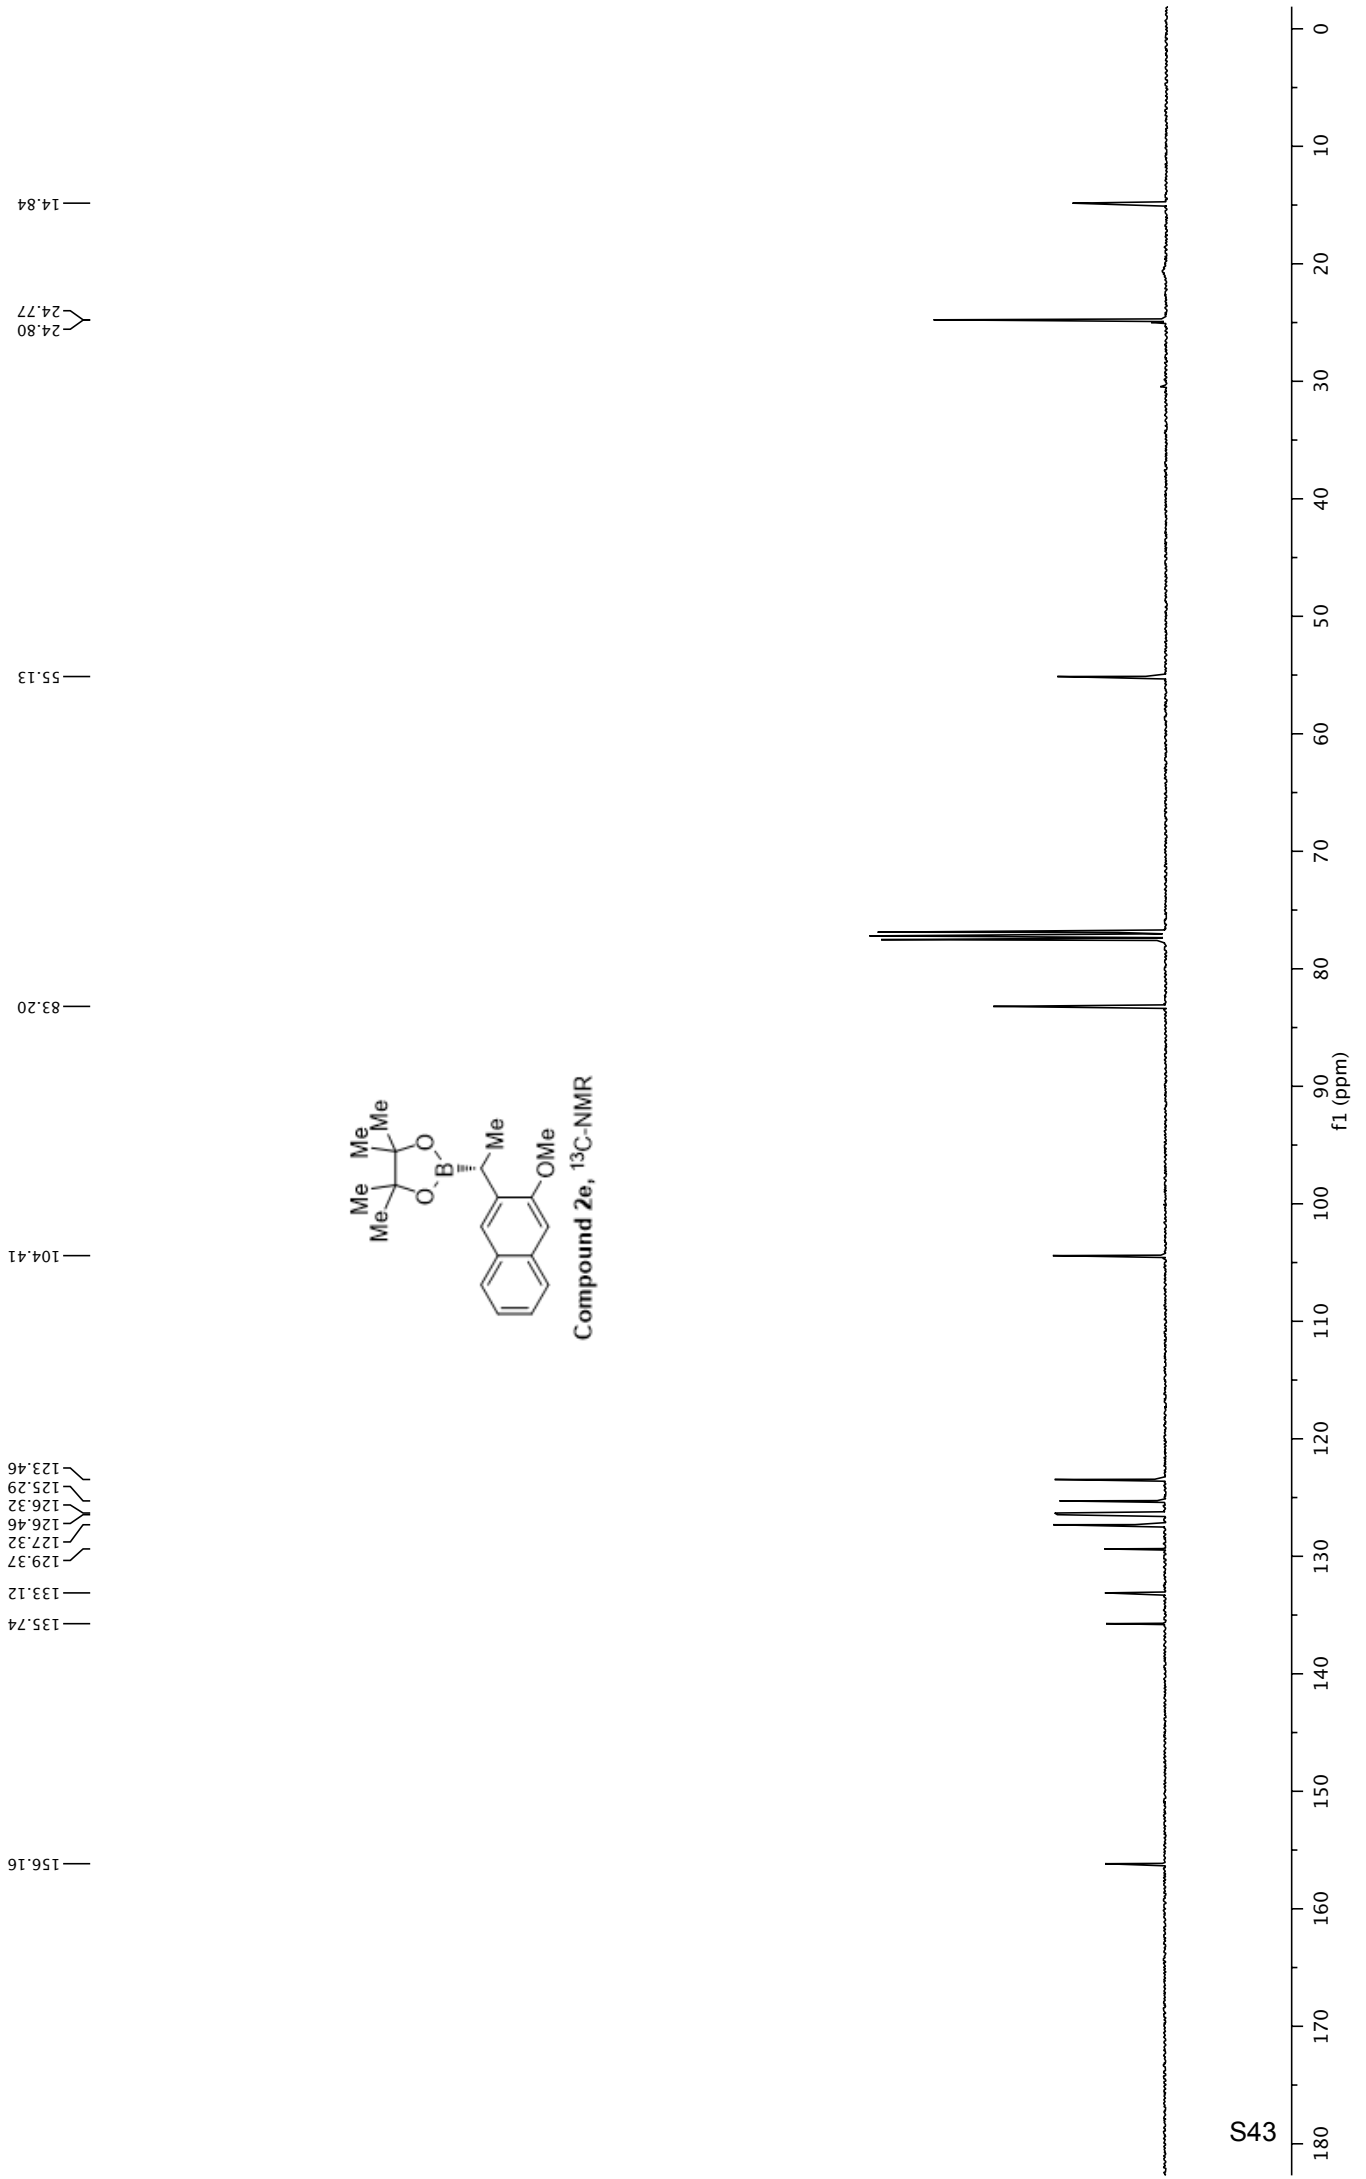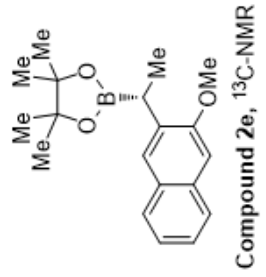

- 156.16
- 135.74
- 133.12
- 129.37
- 127.32
- 126.46
- 126.32
- 125.29
- 123.46
- 104.41
- 83.20
- 55.13
- 24.80
- 14.84

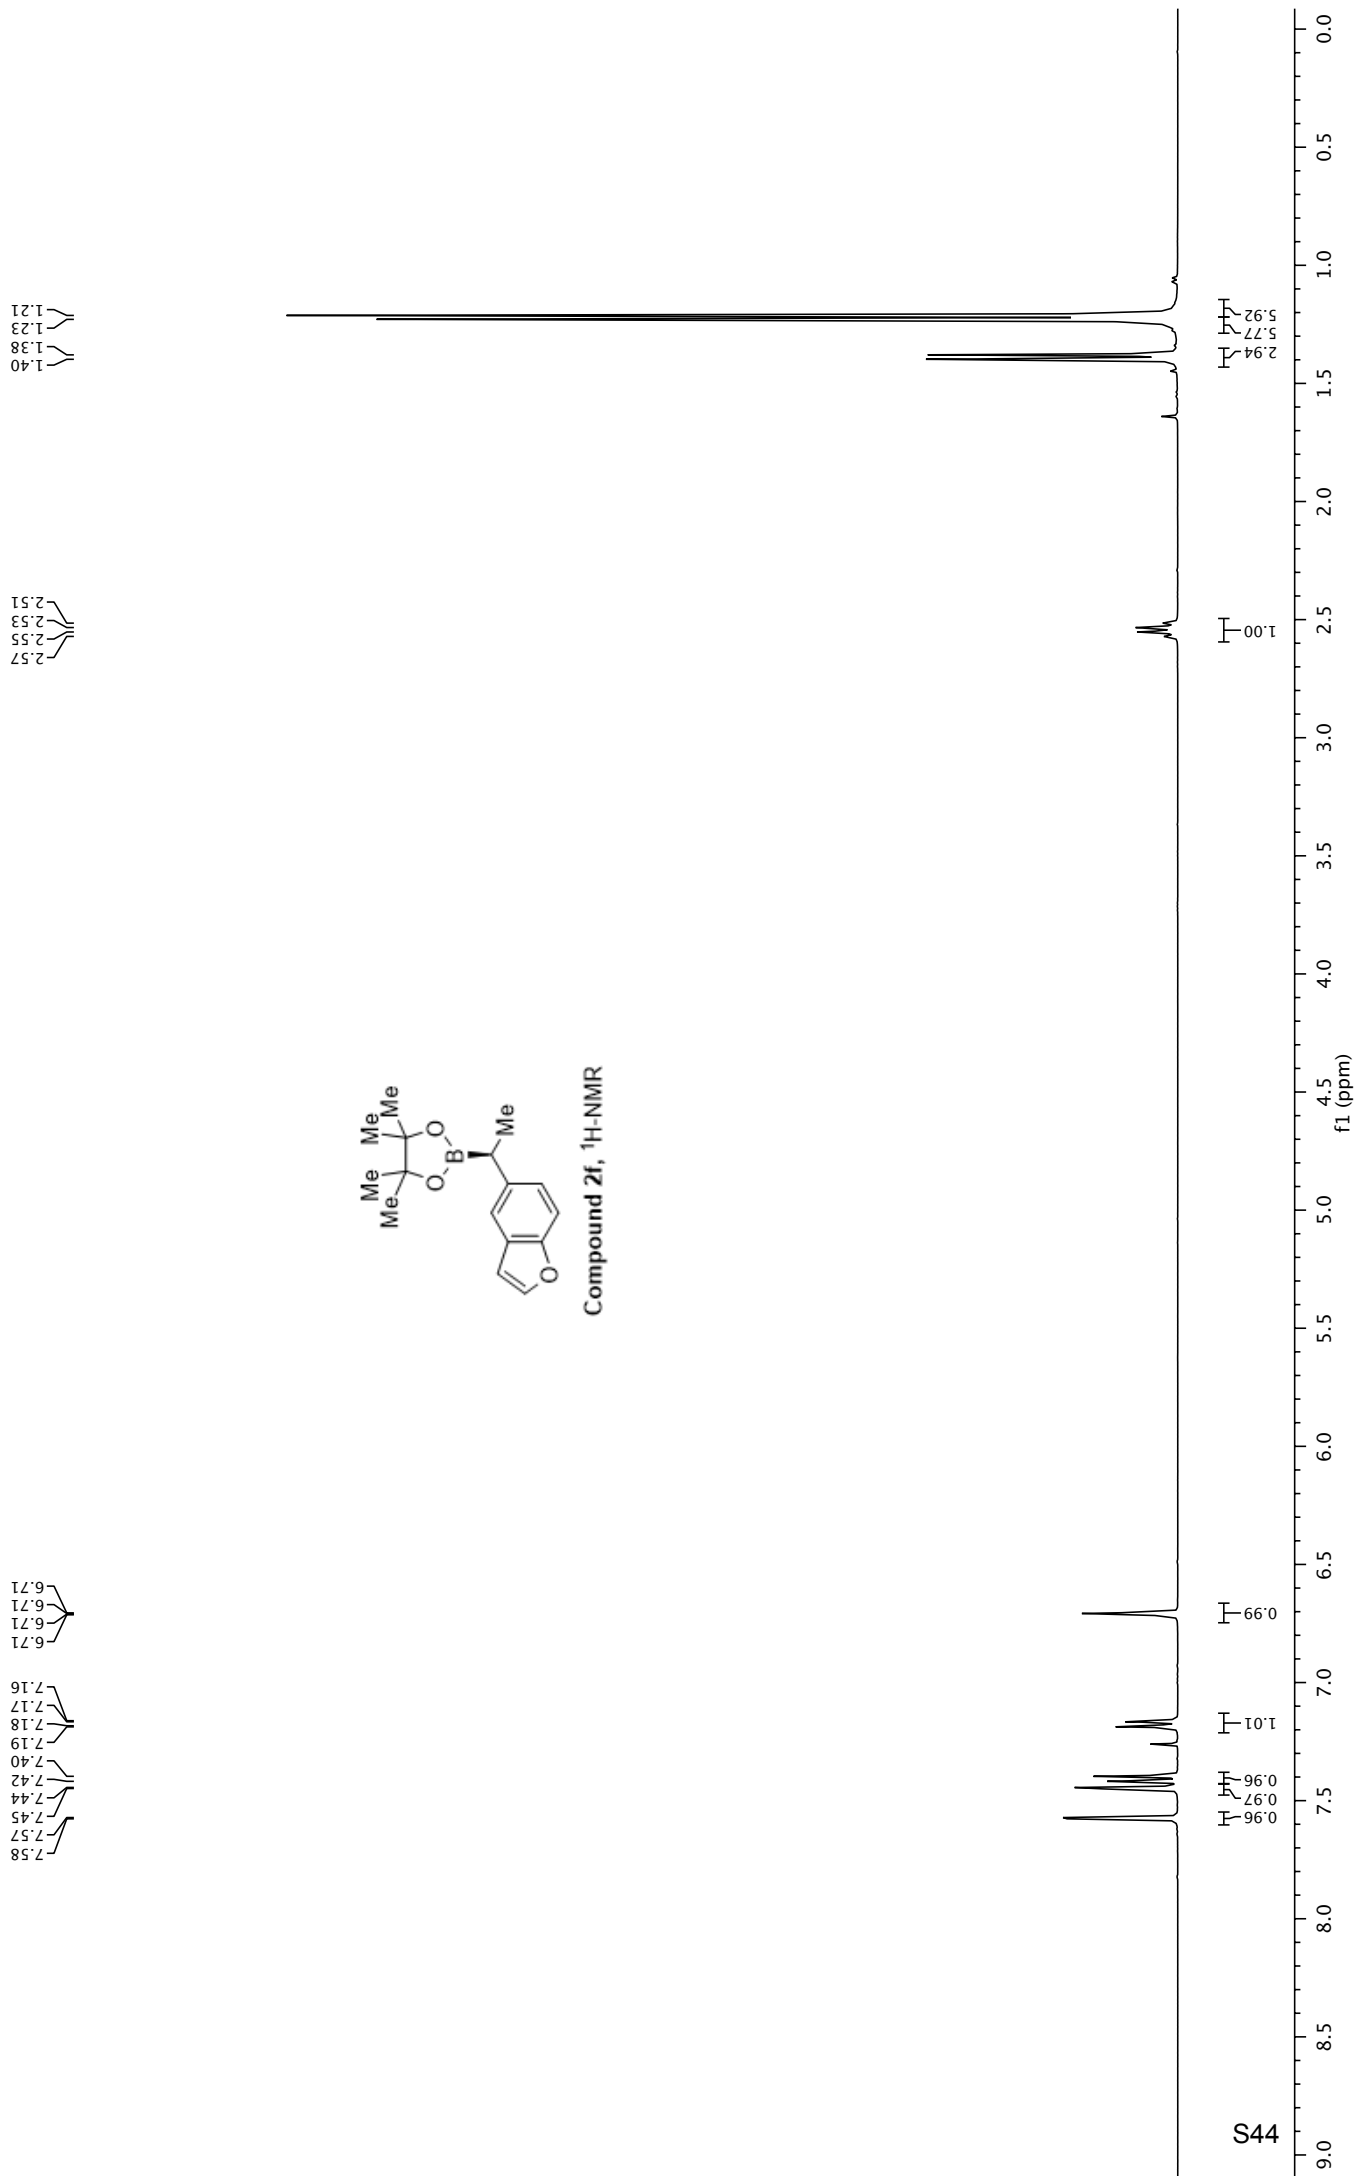

— 17.92  
— 24.75

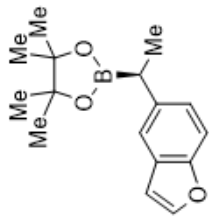

Compound 2f,  $^{13}\text{C}$ -NMR

— 83.43

— 106.67

— 111.12

— 119.77

— 124.67

— 127.68

— 139.58

— 144.95

— 153.39

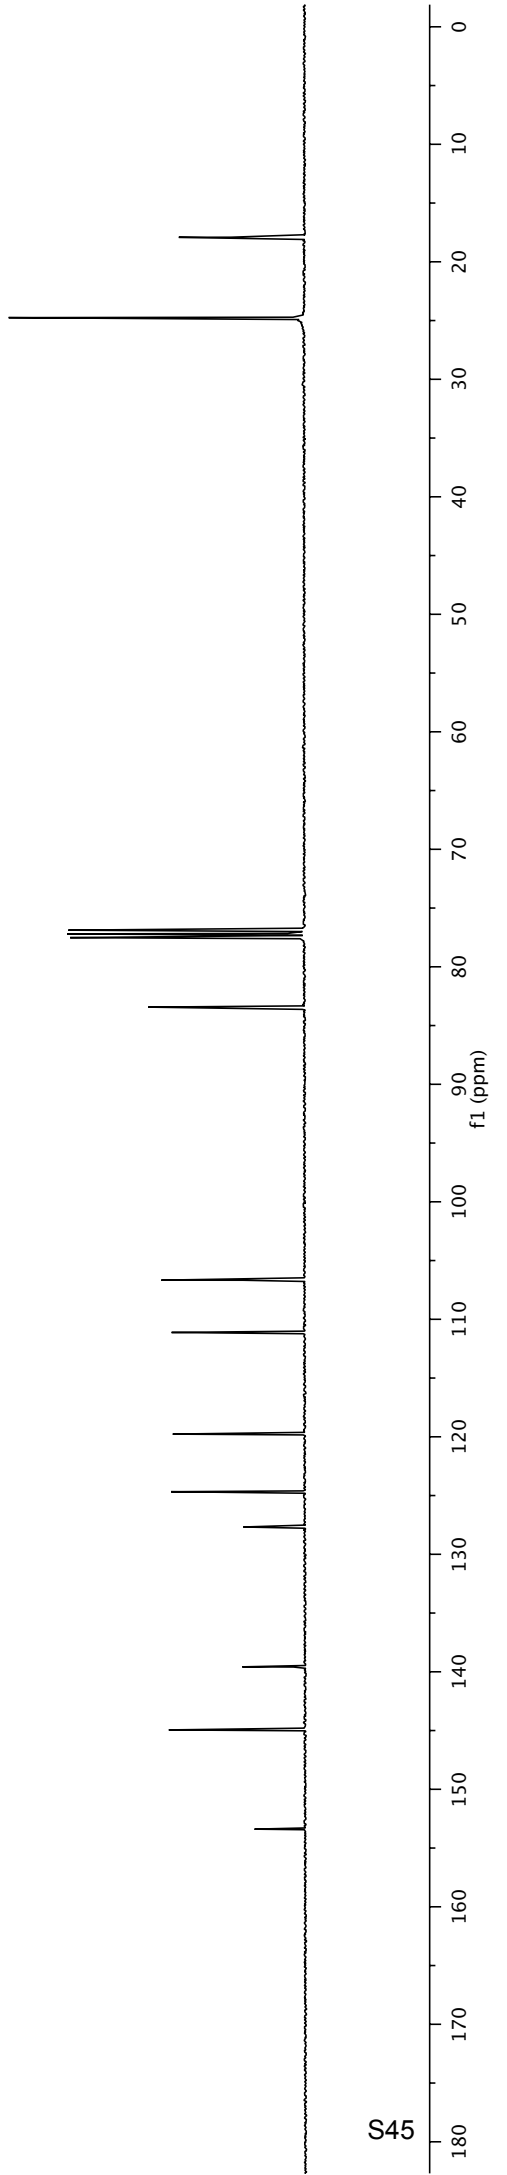

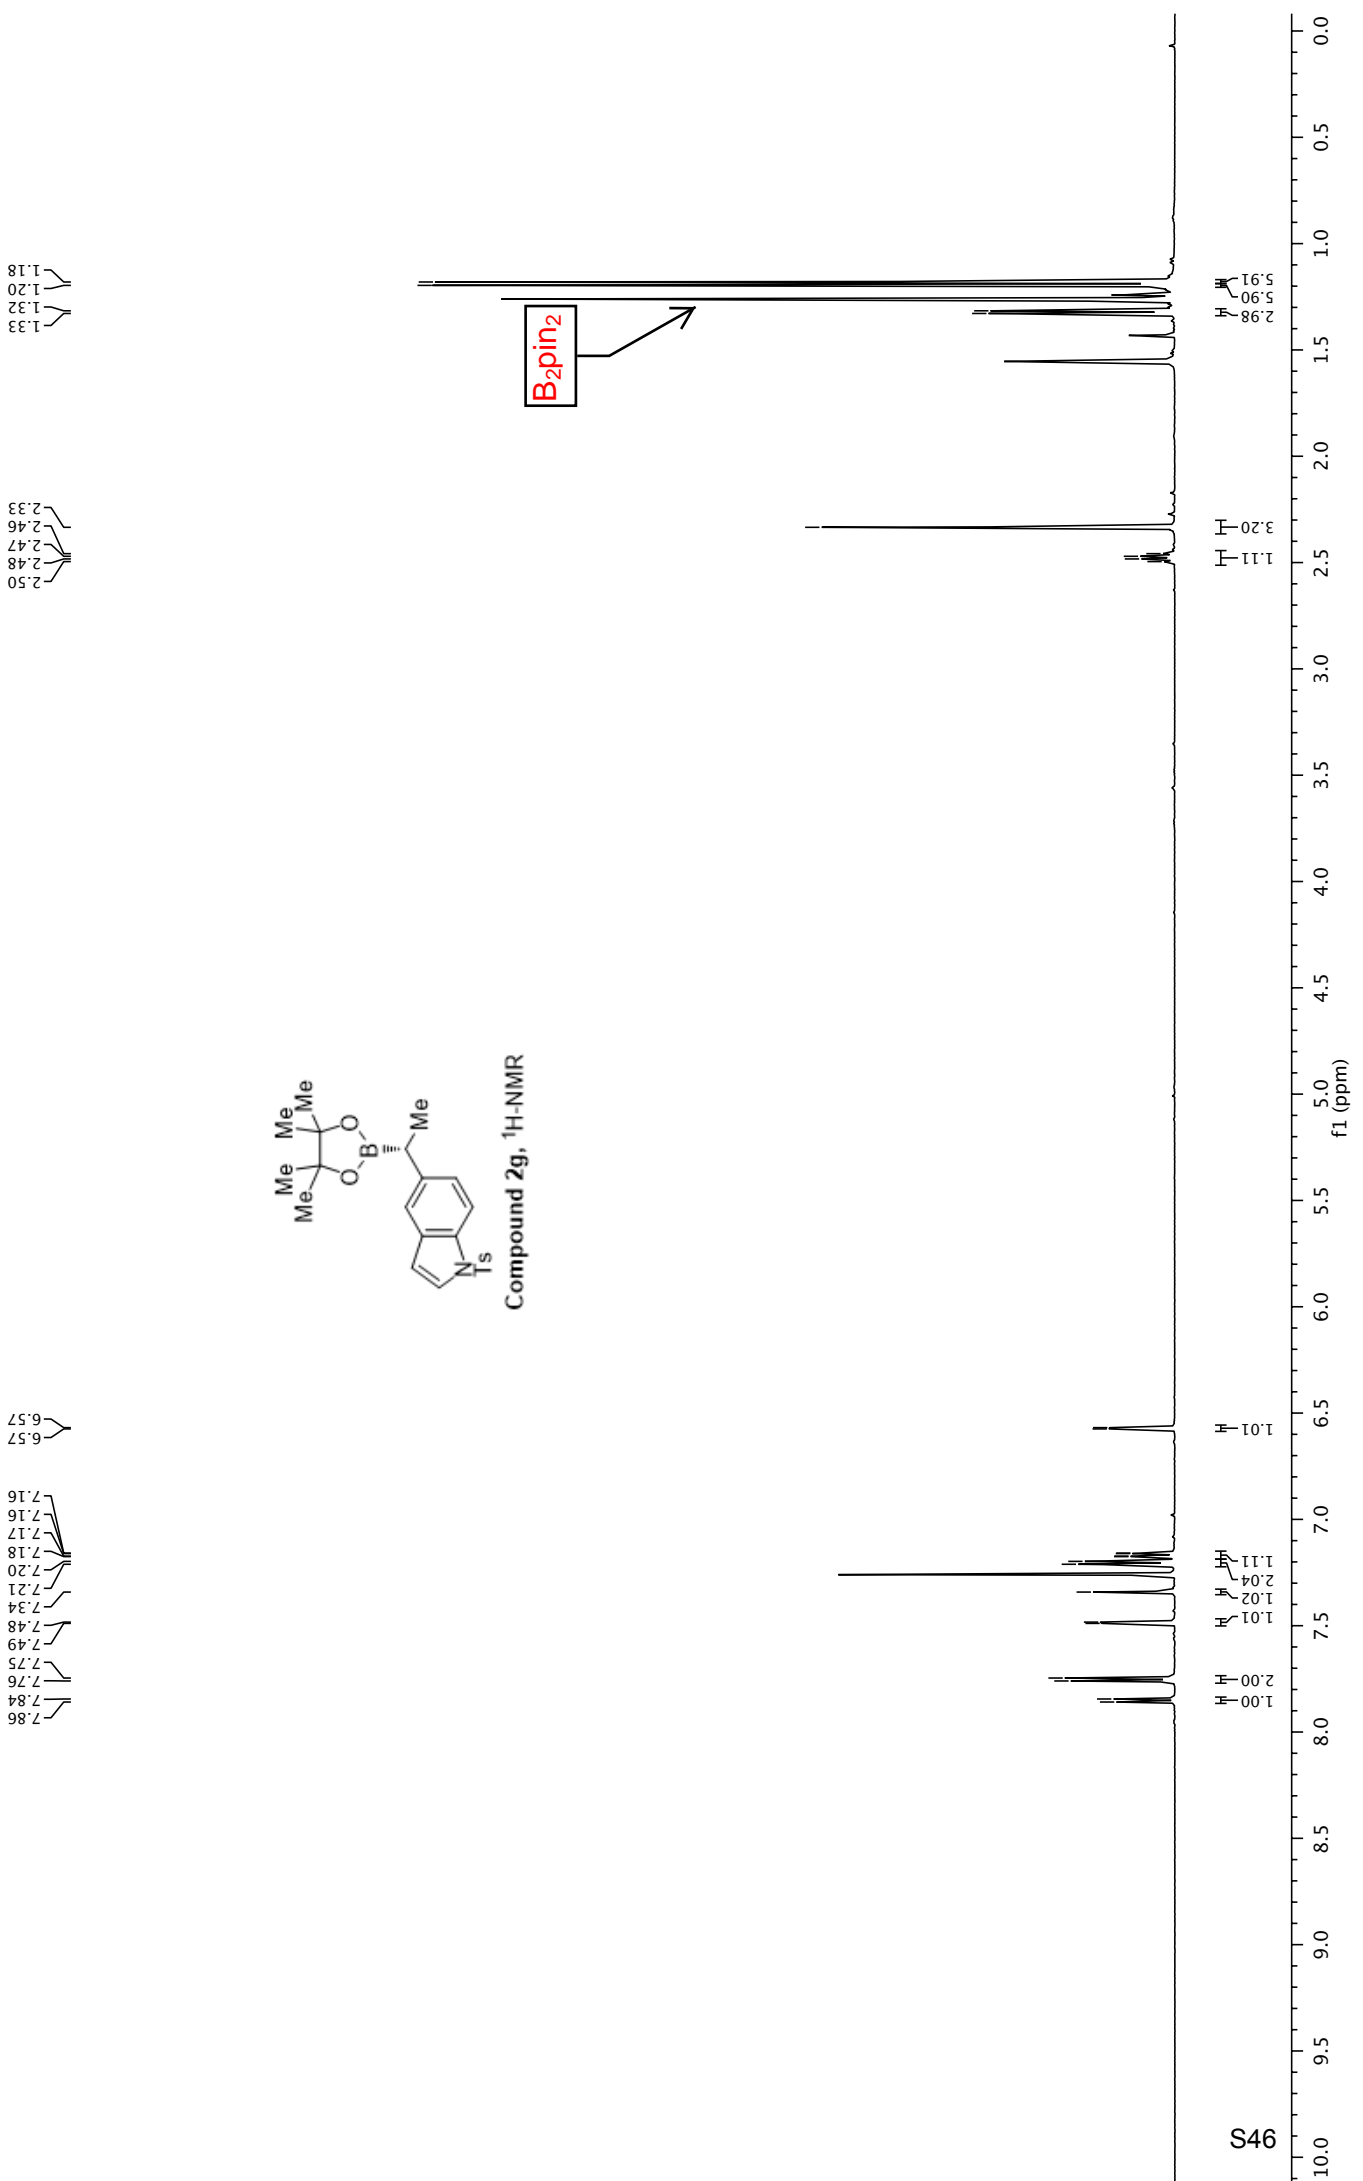

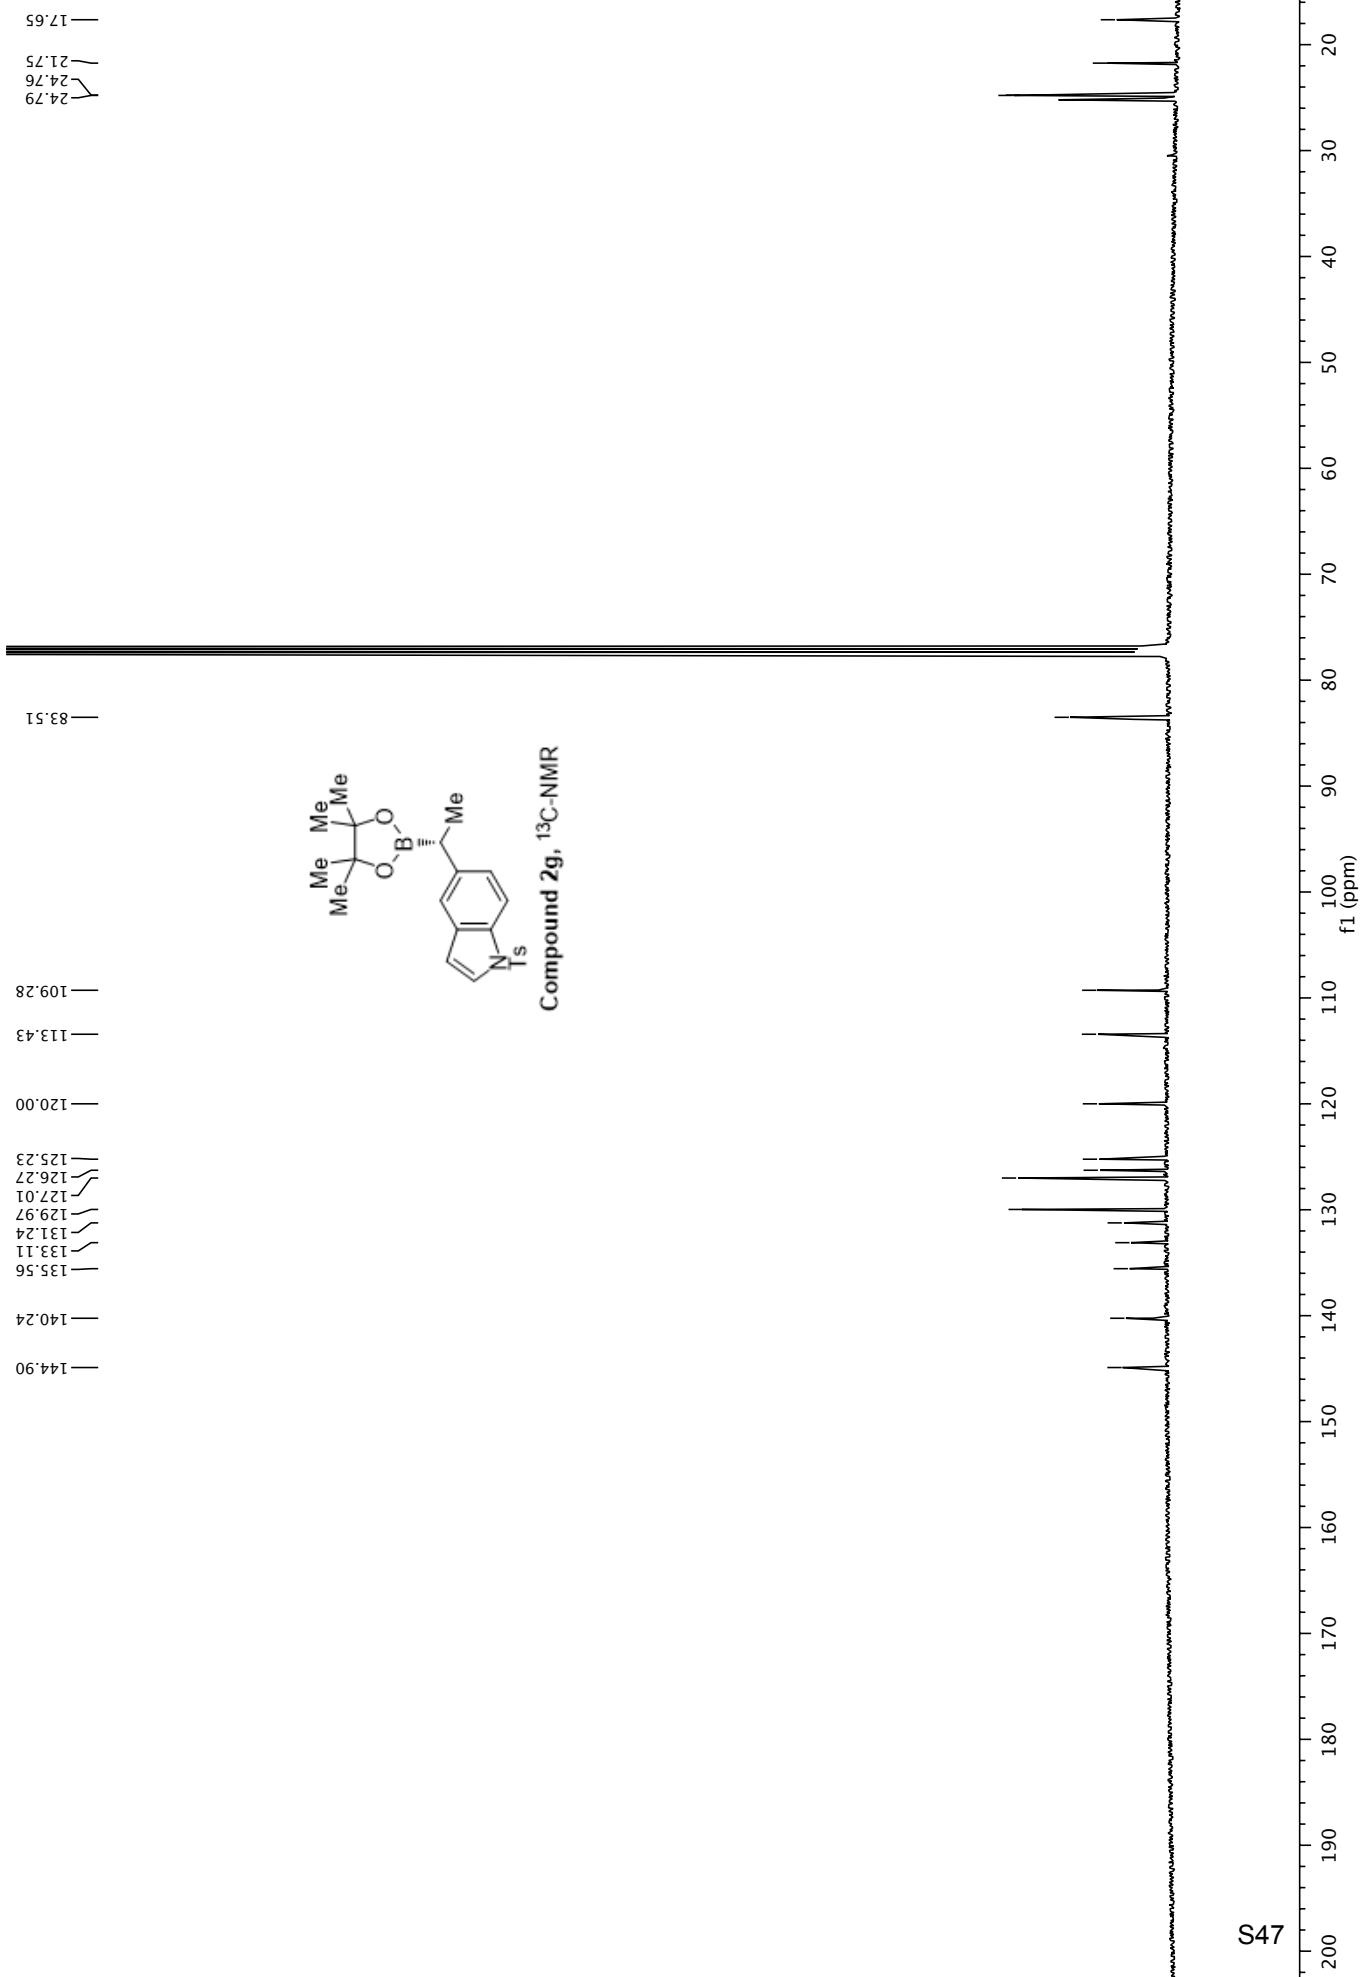

2.52  
2.50  
2.48  
2.18  
2.17  
2.15  
2.14  
2.13  
2.12  
2.11  
2.11  
2.10  
2.09  
2.08  
2.07  
2.06  
2.05  
2.03  
2.03  
2.01  
1.99  
1.98  
1.90  
1.88  
1.86  
1.84  
1.84  
1.82  
1.80  
1.64  
1.62  
1.60  
1.60  
1.58  
1.56  
1.55  
1.54  
1.52  
1.23  
1.20

7.82  
7.80  
7.79  
7.78  
7.77  
7.65  
7.48  
7.46  
7.46  
7.44  
7.42  
7.42  
7.41  
7.40  
7.39  
7.39  
7.37

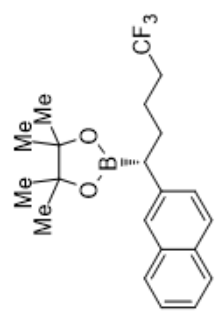

Compound 2h, <sup>1</sup>H-NMR

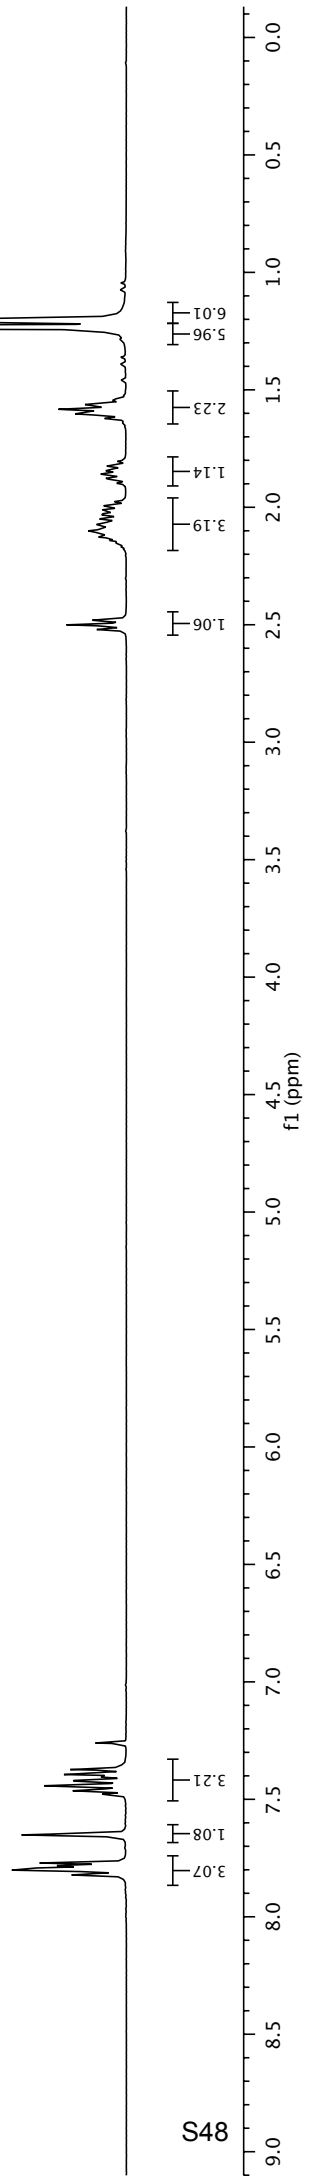



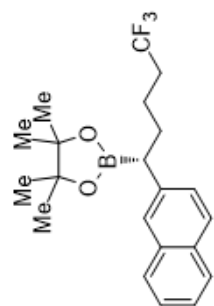Compound 2h, <sup>13</sup>C-NMR

34.22  
34.03  
33.84  
33.65  
31.59  
24.81  
24.73  
21.76  
21.74  
21.72  
21.70

83.74

140.19  
133.98  
132.05  
130.09  
128.26  
128.13  
127.73  
127.64  
127.32  
126.48  
126.43  
125.96  
125.16  
124.60

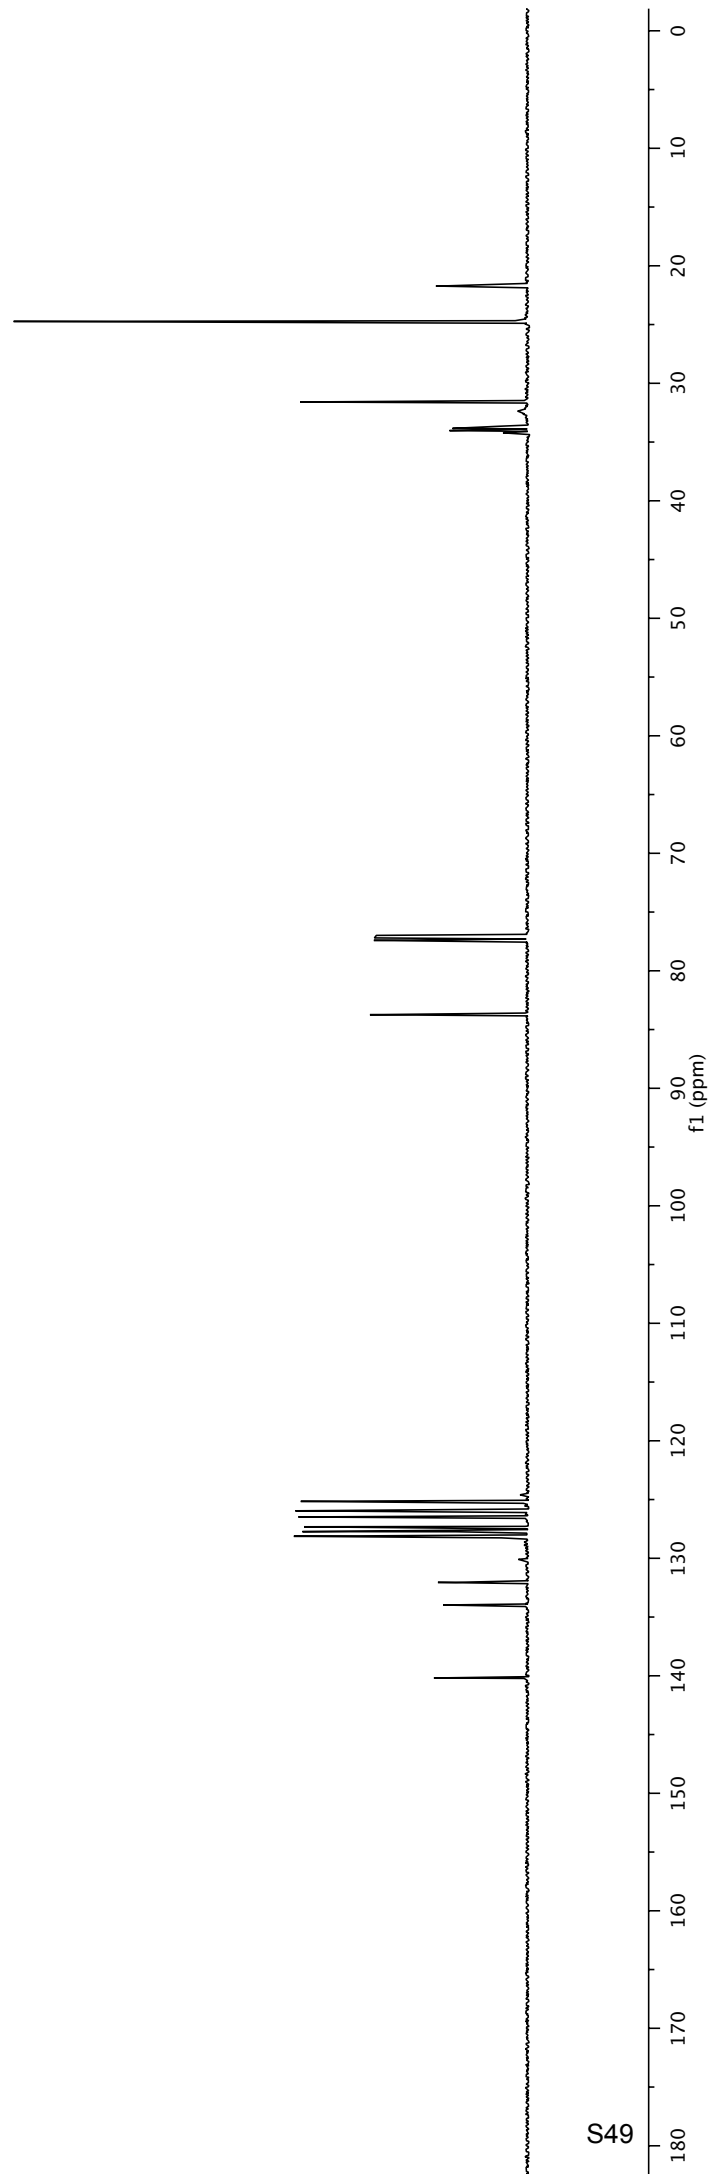

—66.29

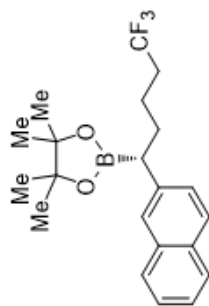

Compound 2h,  $^{19}\text{F}$ -NMR

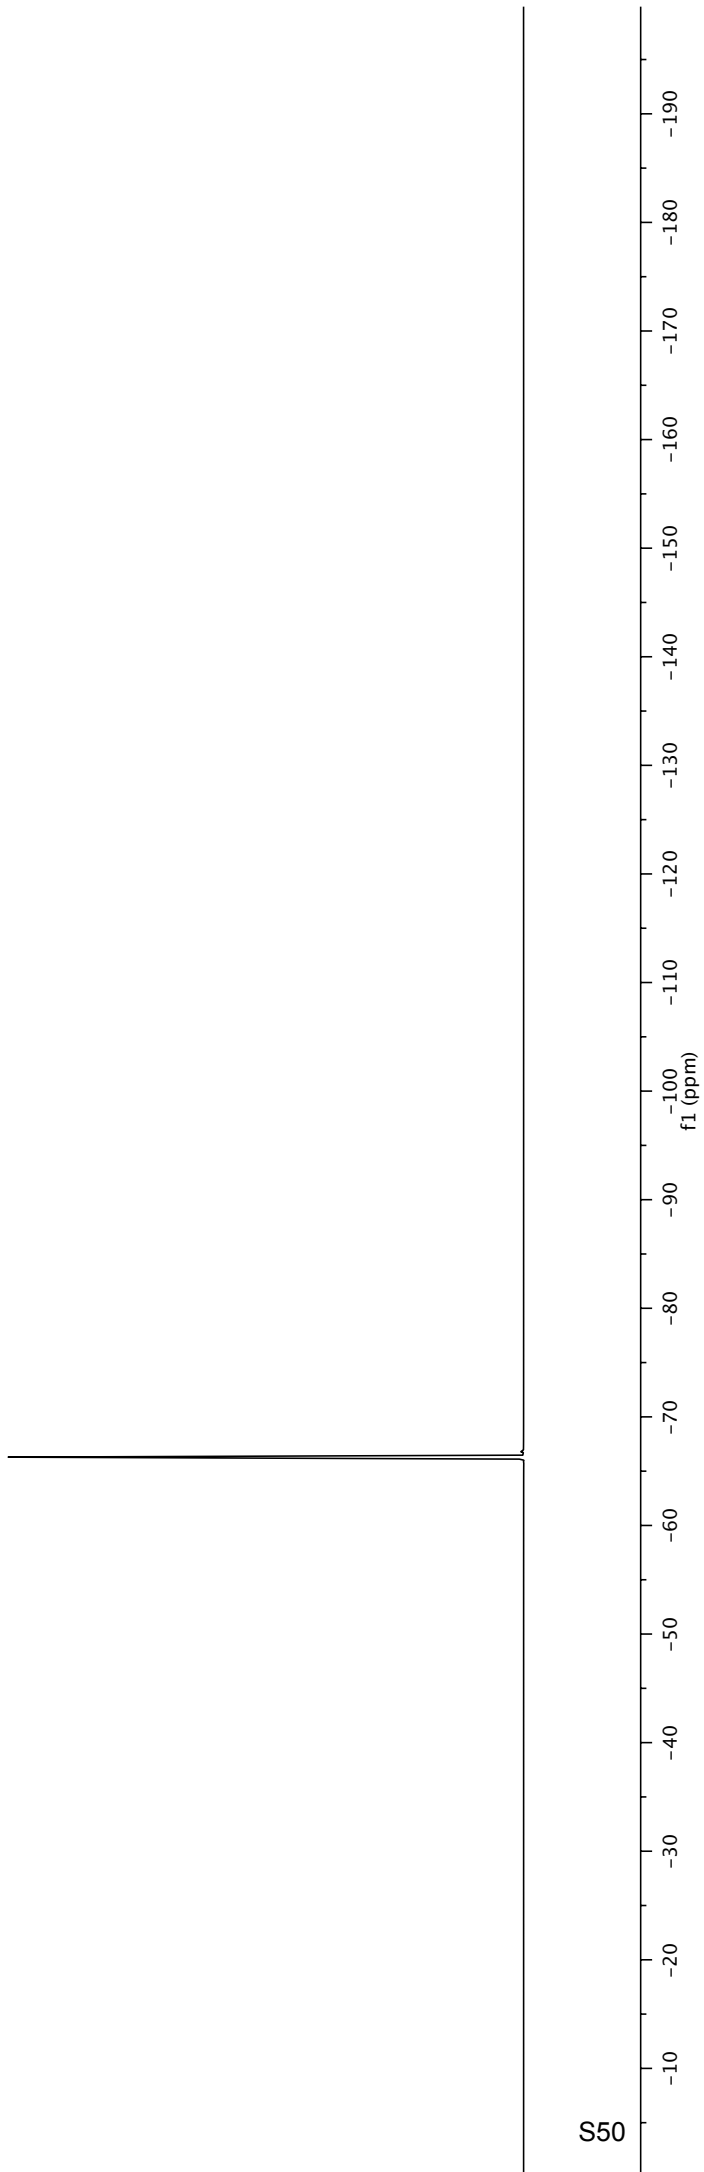



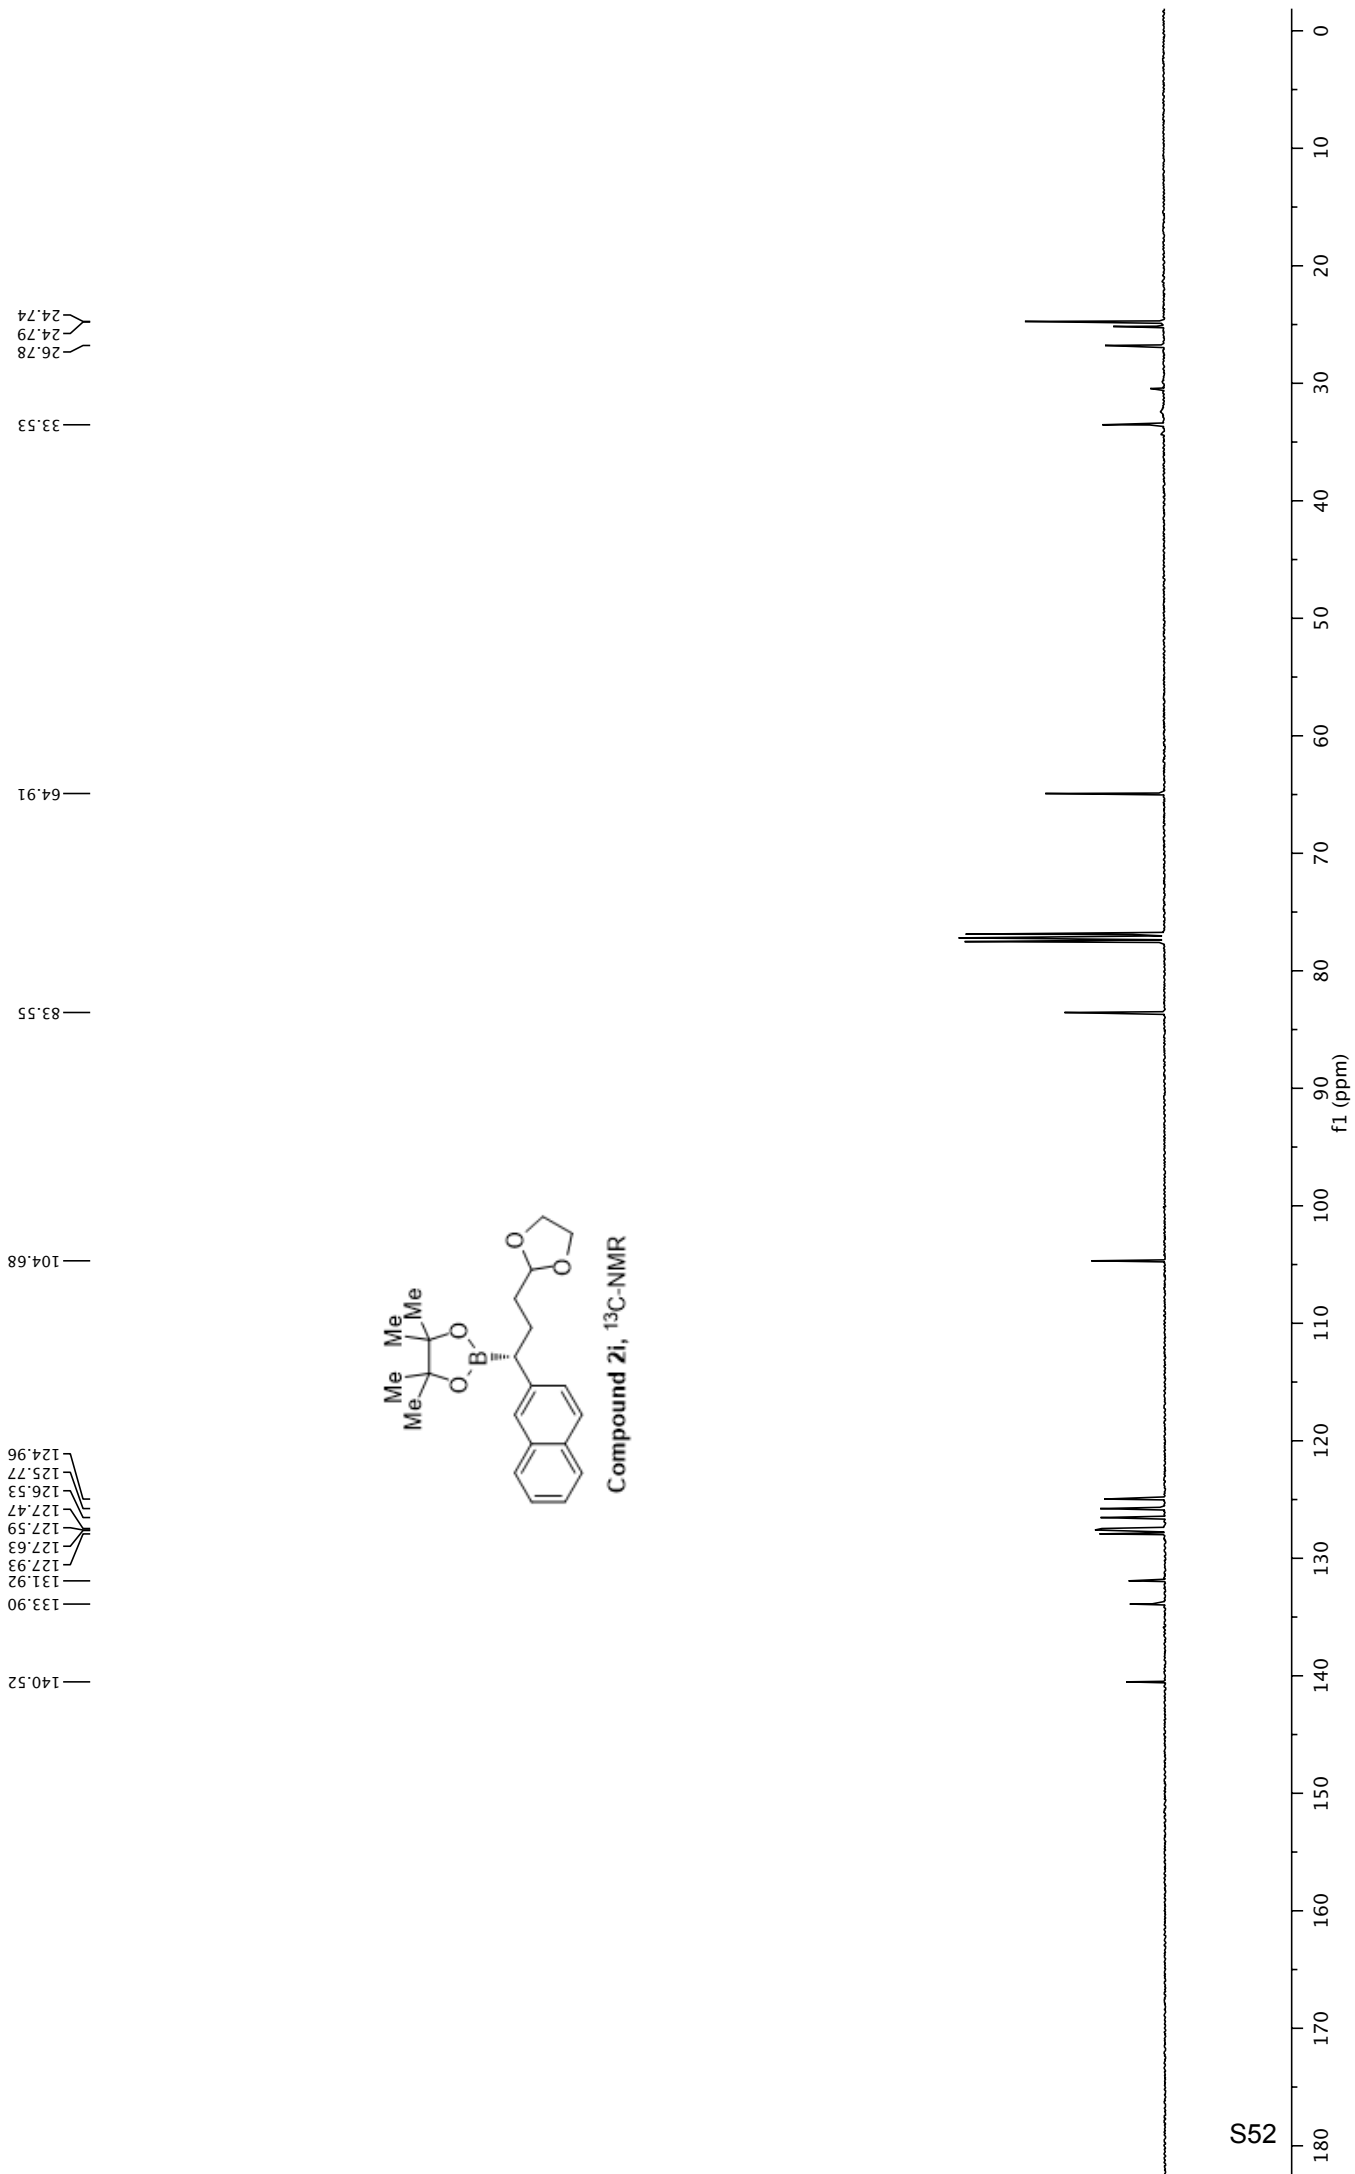

2.67  
2.65  
2.63  
2.62  
2.60  
2.58  
2.36  
2.34  
2.33  
2.32  
2.31  
2.29  
2.27  
2.20  
2.18  
2.17  
2.16  
2.15  
2.14  
2.13  
2.11  
1.25  
1.23

7.85  
7.83  
7.83  
7.81  
7.81  
7.80  
7.71  
7.50  
7.48  
7.48  
7.46  
7.46  
7.44  
7.44  
7.42  
7.42  
7.33  
7.31  
7.29  
7.23  
7.22  
7.21  
7.20

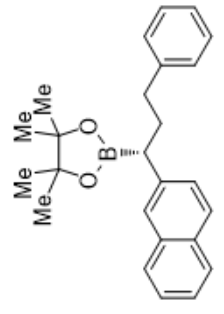

Compound 2j, <sup>1</sup>H-NMR

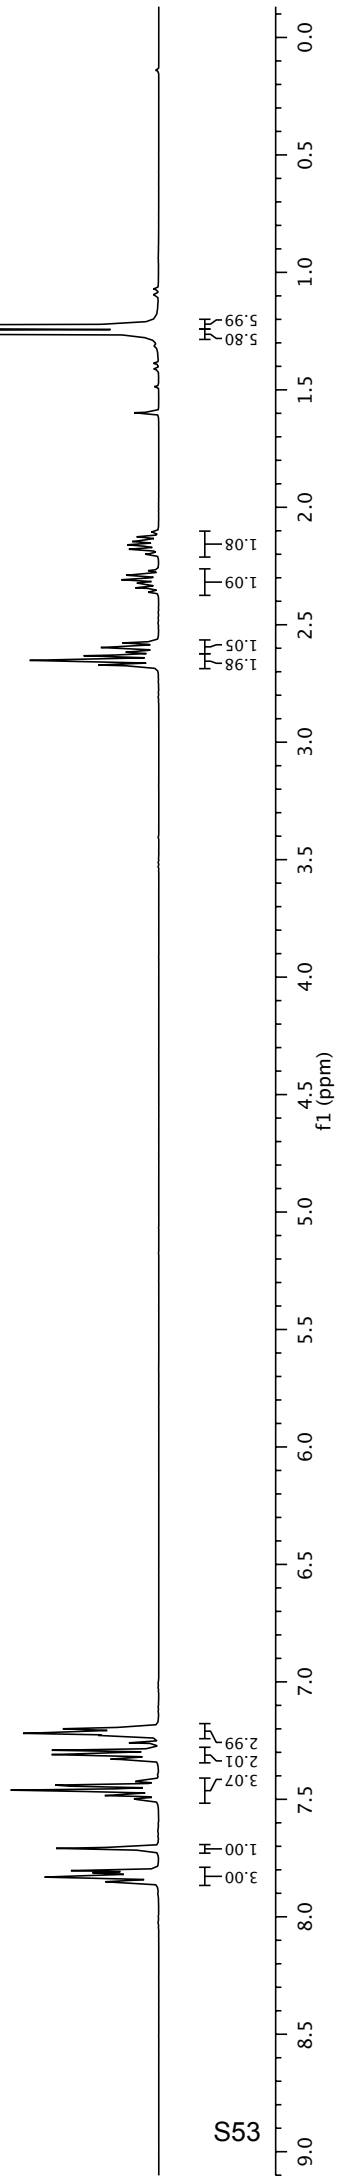

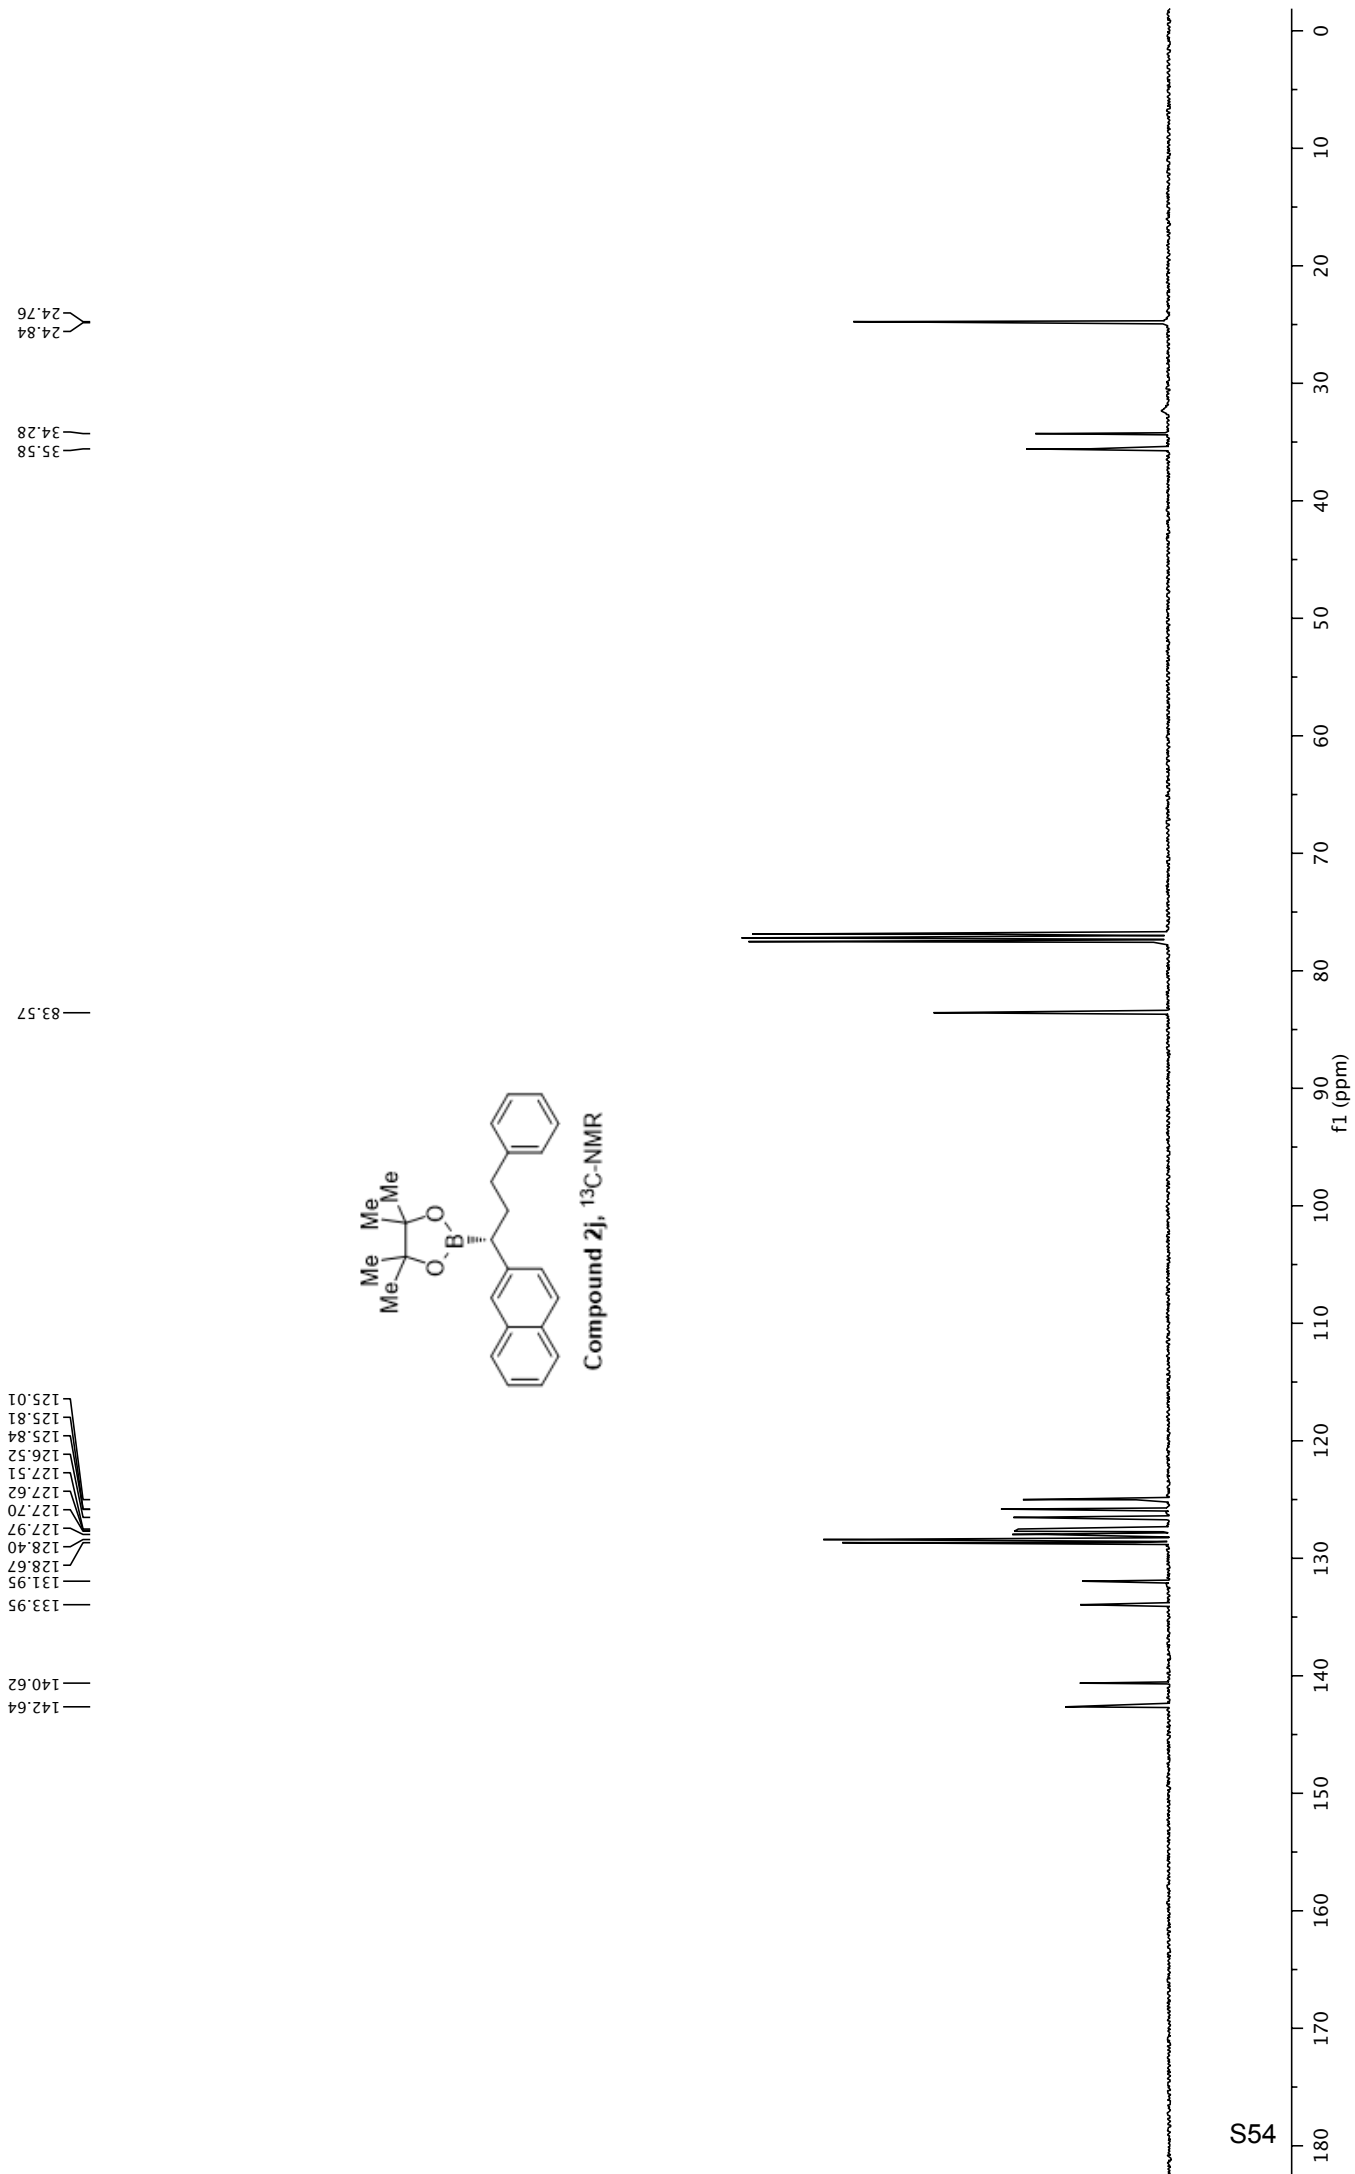

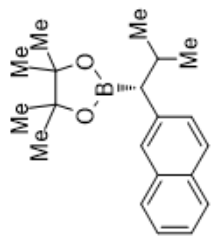

Compound 2k, <sup>1</sup>H-NMR

1.21  
1.18  
1.11  
1.09  
0.77  
0.76

2.32  
2.31  
2.29  
2.28  
2.28  
2.27  
2.26  
2.25  
2.24  
2.23  
2.22  
2.20  
2.17  
2.15

7.81  
7.79  
7.77  
7.76  
7.74  
7.66  
7.46  
7.45  
7.44  
7.44  
7.42  
7.42  
7.40  
7.40  
7.38  
7.38

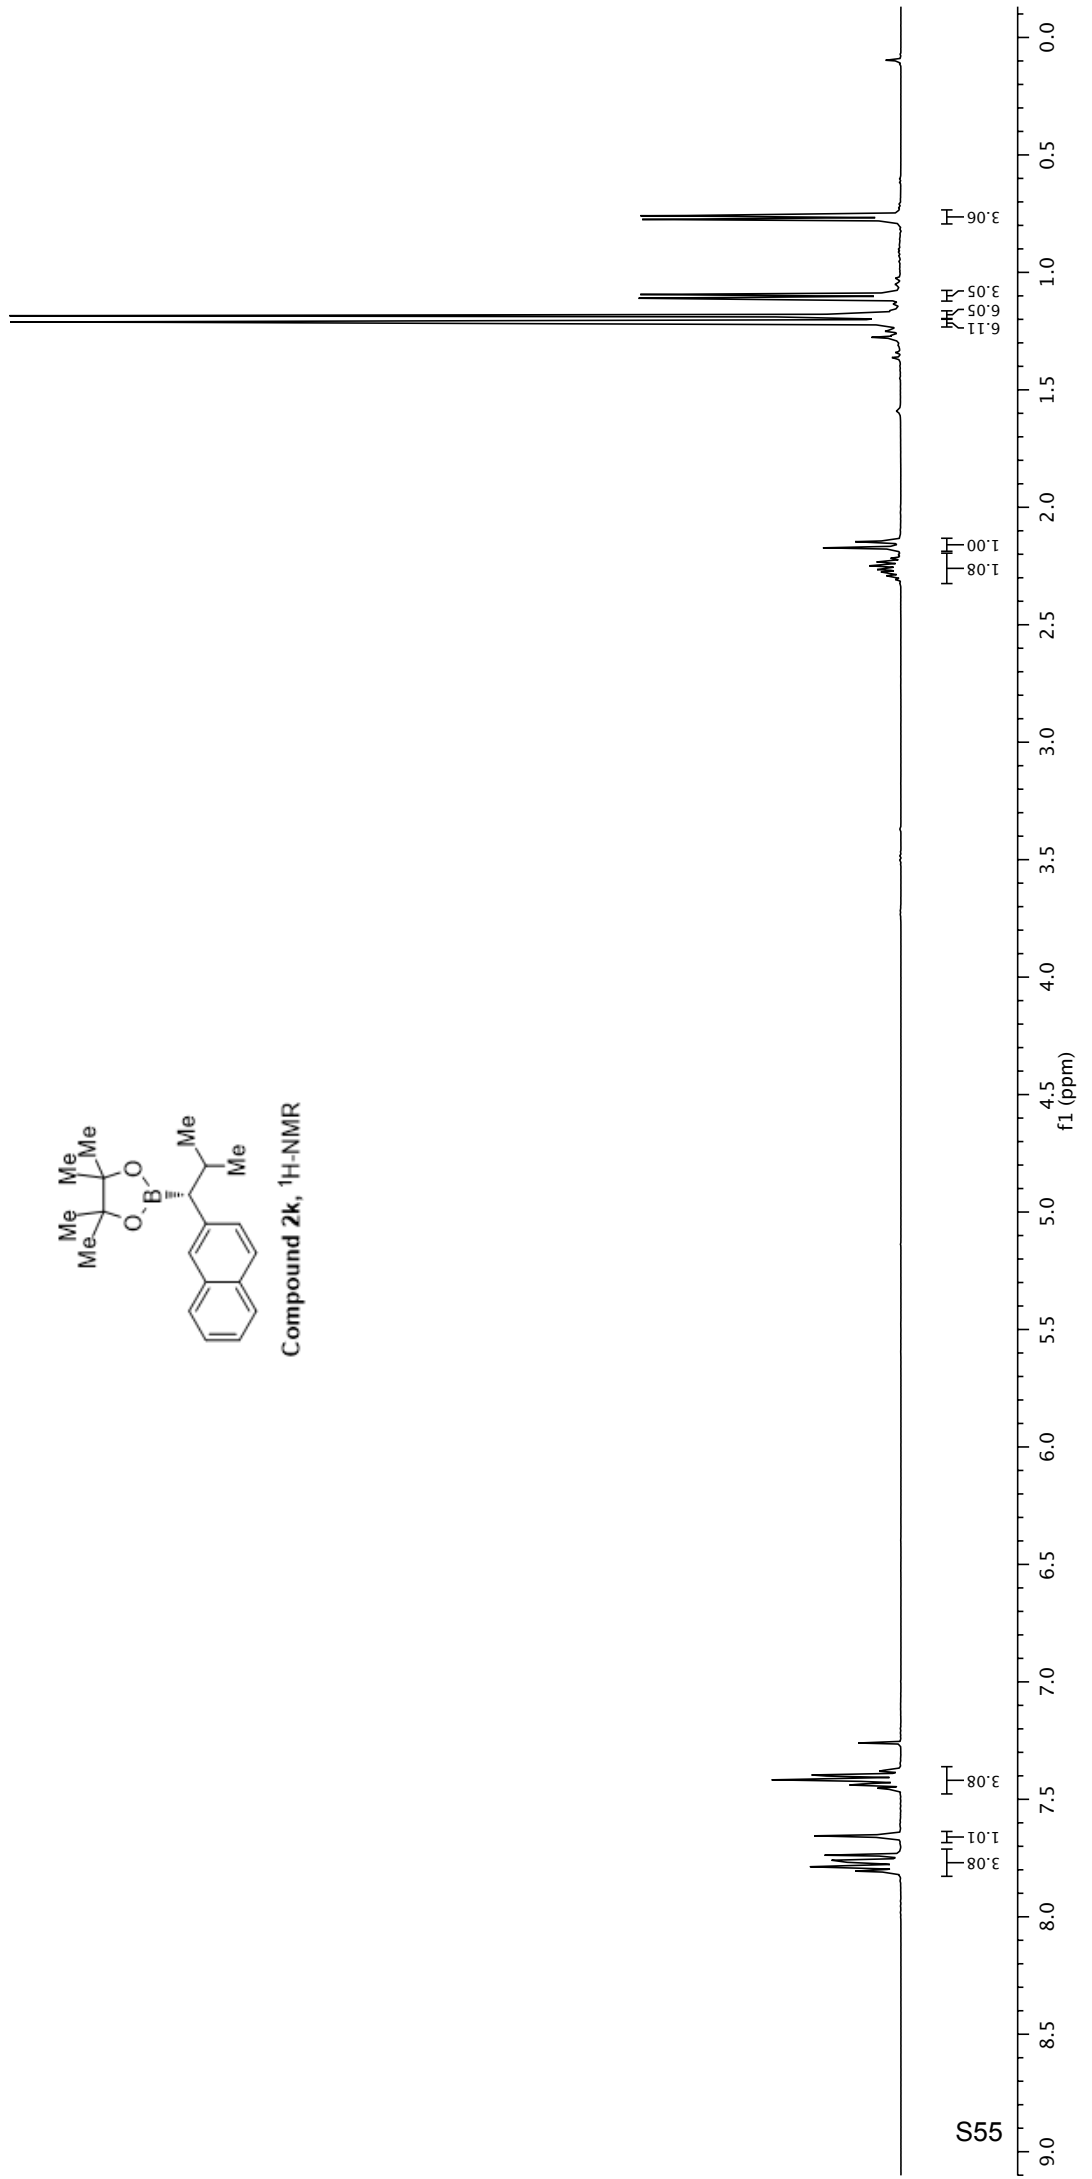

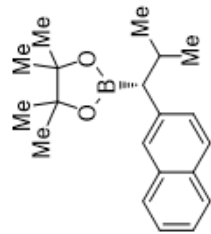

Compound 2k, <sup>13</sup>C-NMR

— 31.09  
 — 24.83  
 — 24.74  
 — 23.42  
 — 22.26

— 83.43

— 140.20  
 — 133.90  
 — 131.97  
 — 128.10  
 — 127.68  
 — 127.64  
 — 127.33  
 — 125.72  
 — 124.92

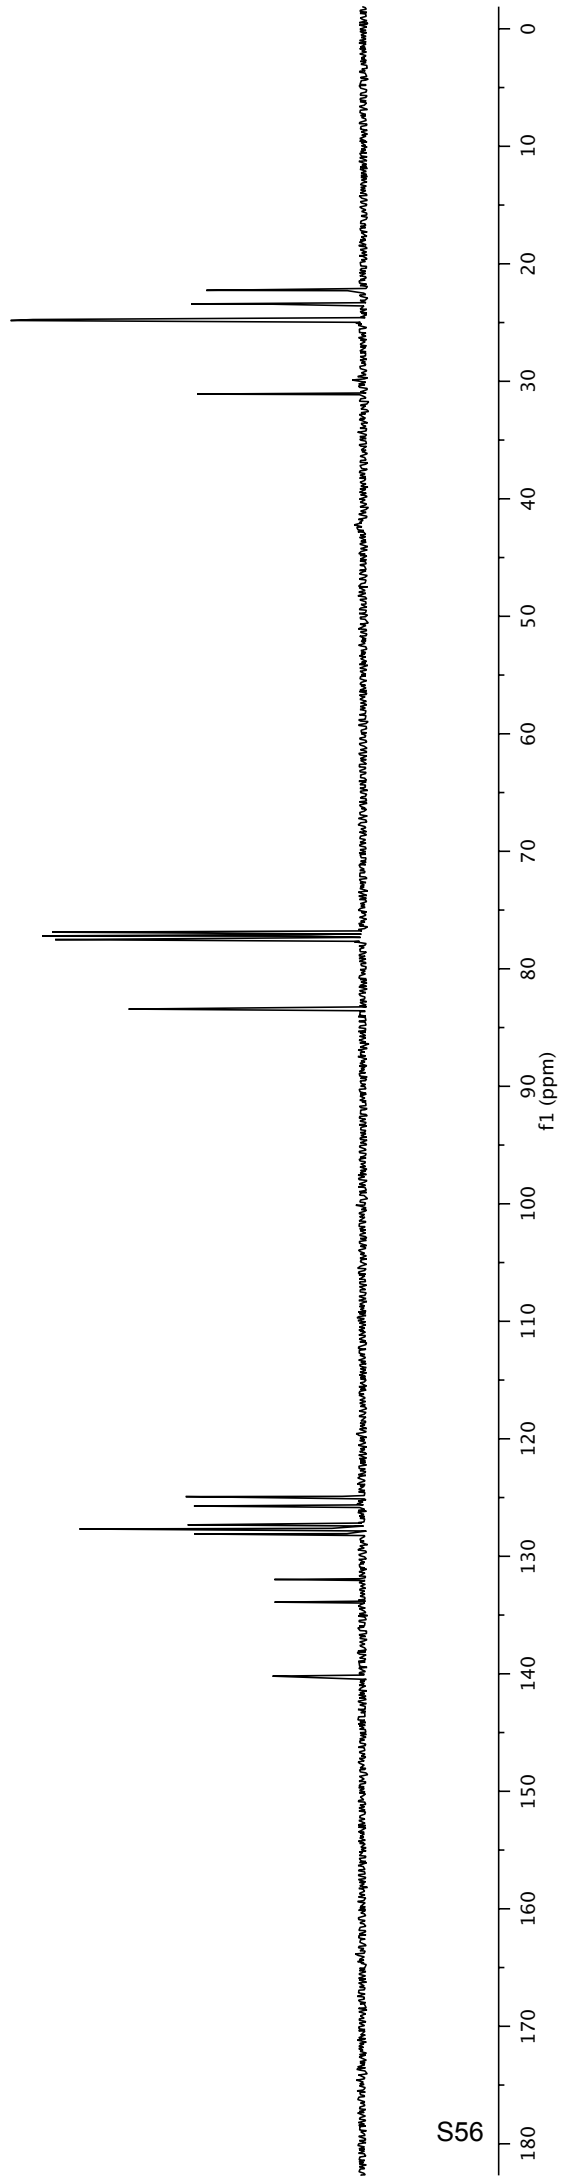



7.19  
7.18  
7.17  
7.16  
7.16  
7.15  
6.98  
6.97  
6.96  
6.95  
6.95  
6.94  
6.93  
6.92

1.32  
1.30  
1.21  
1.20

2.44  
2.42  
2.41  
2.39

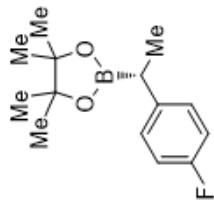

Compound 2n, <sup>1</sup>H-NMR

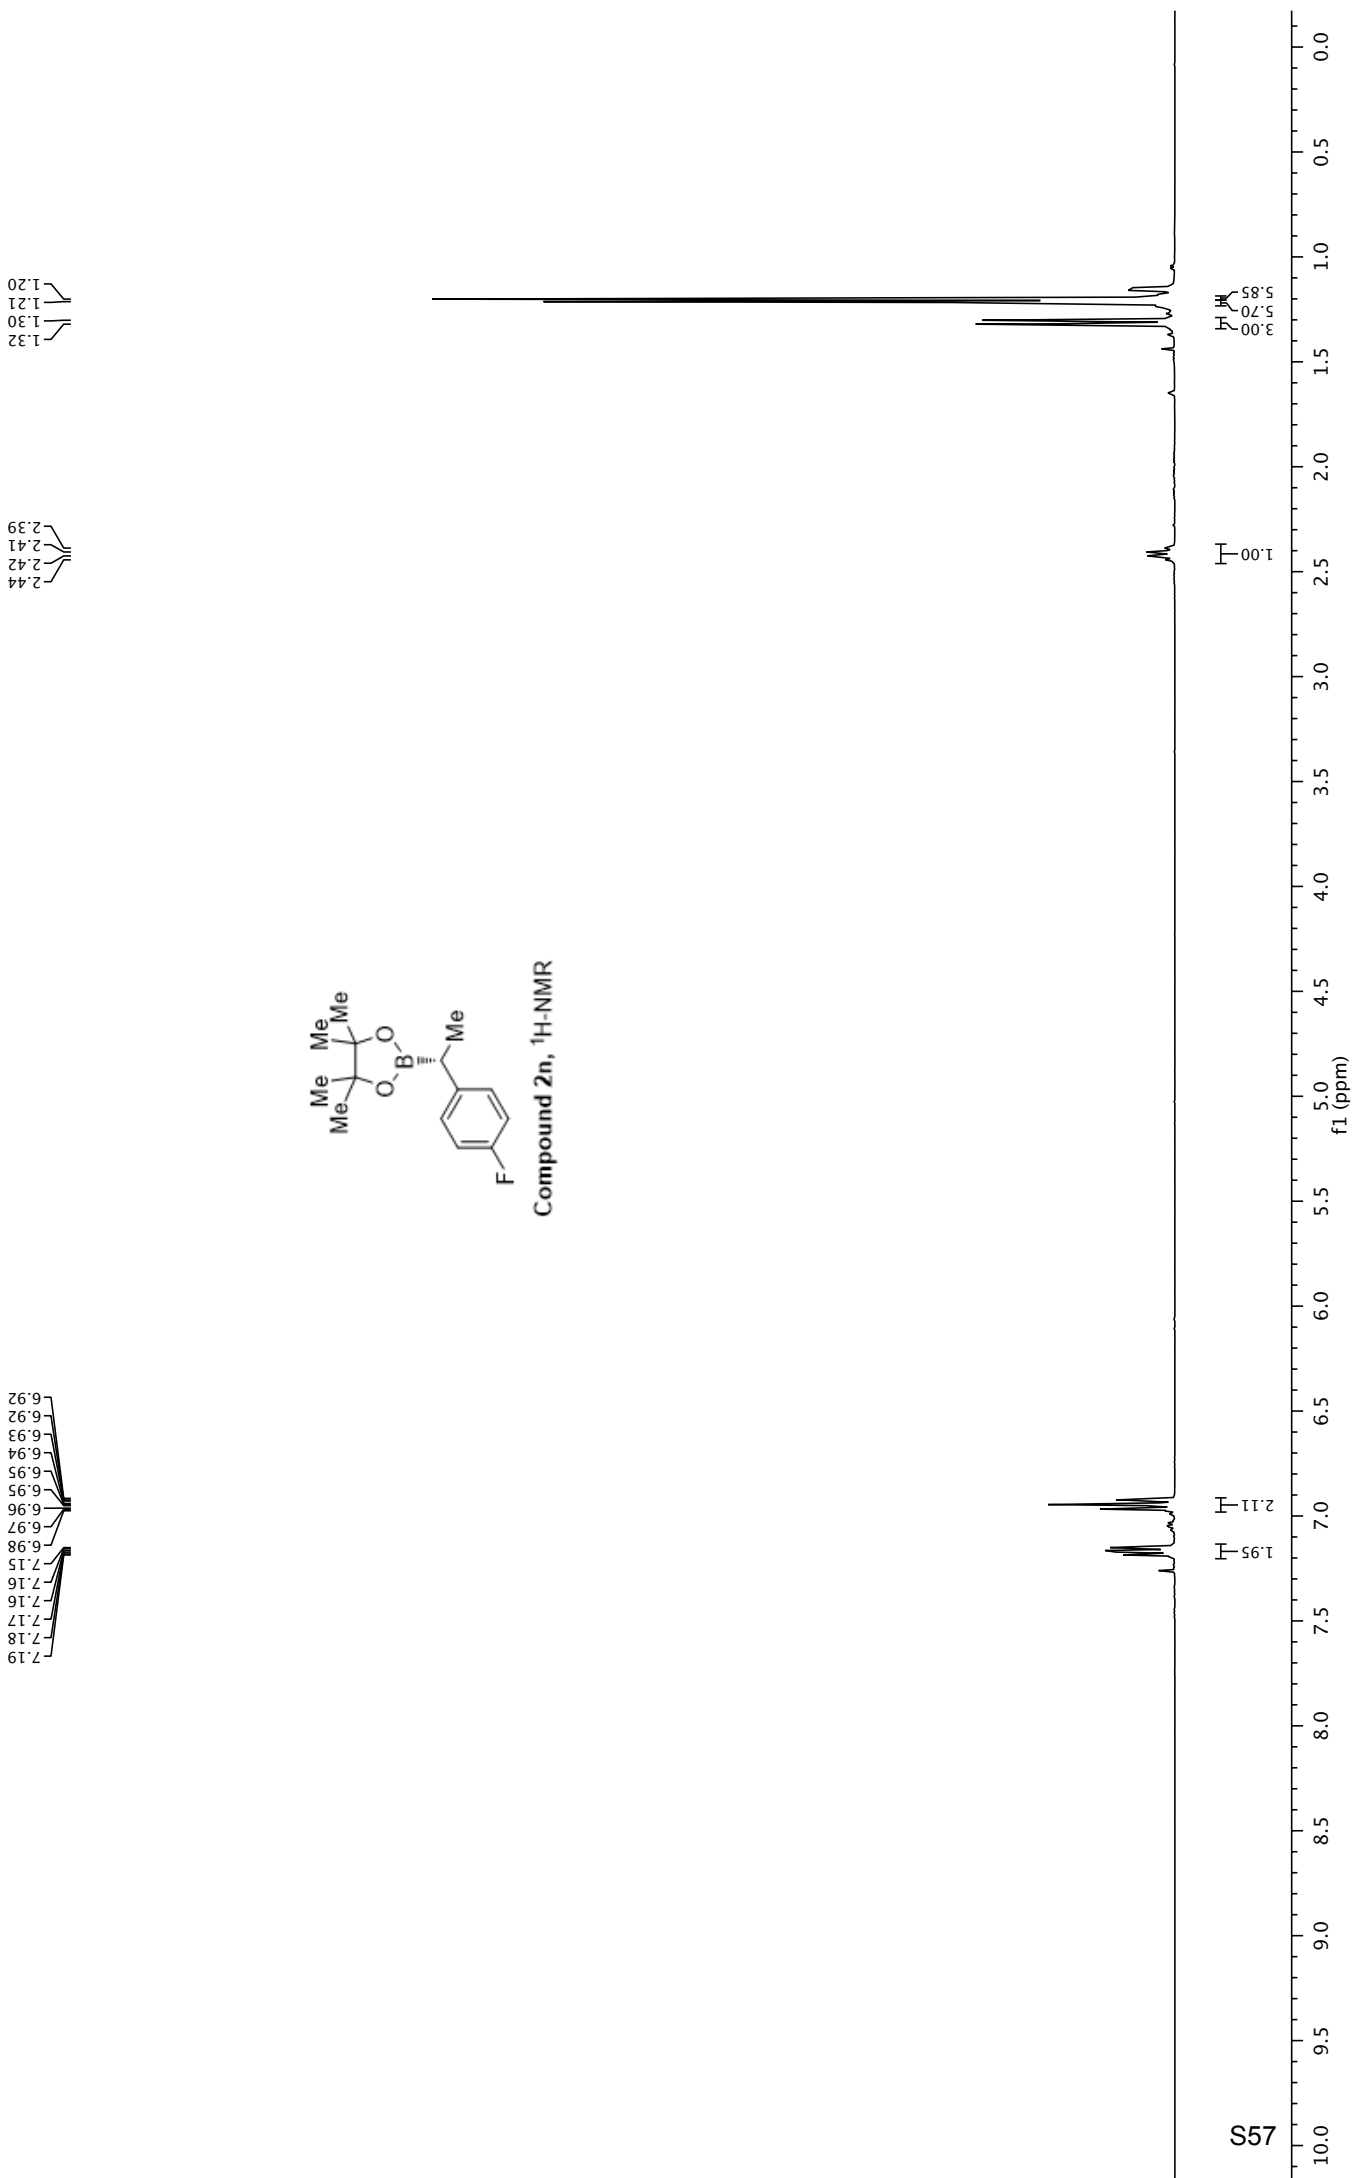

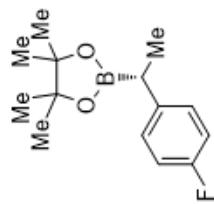

Compound 2n, <sup>13</sup>C-NMR

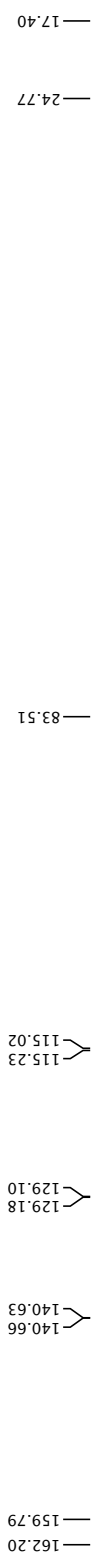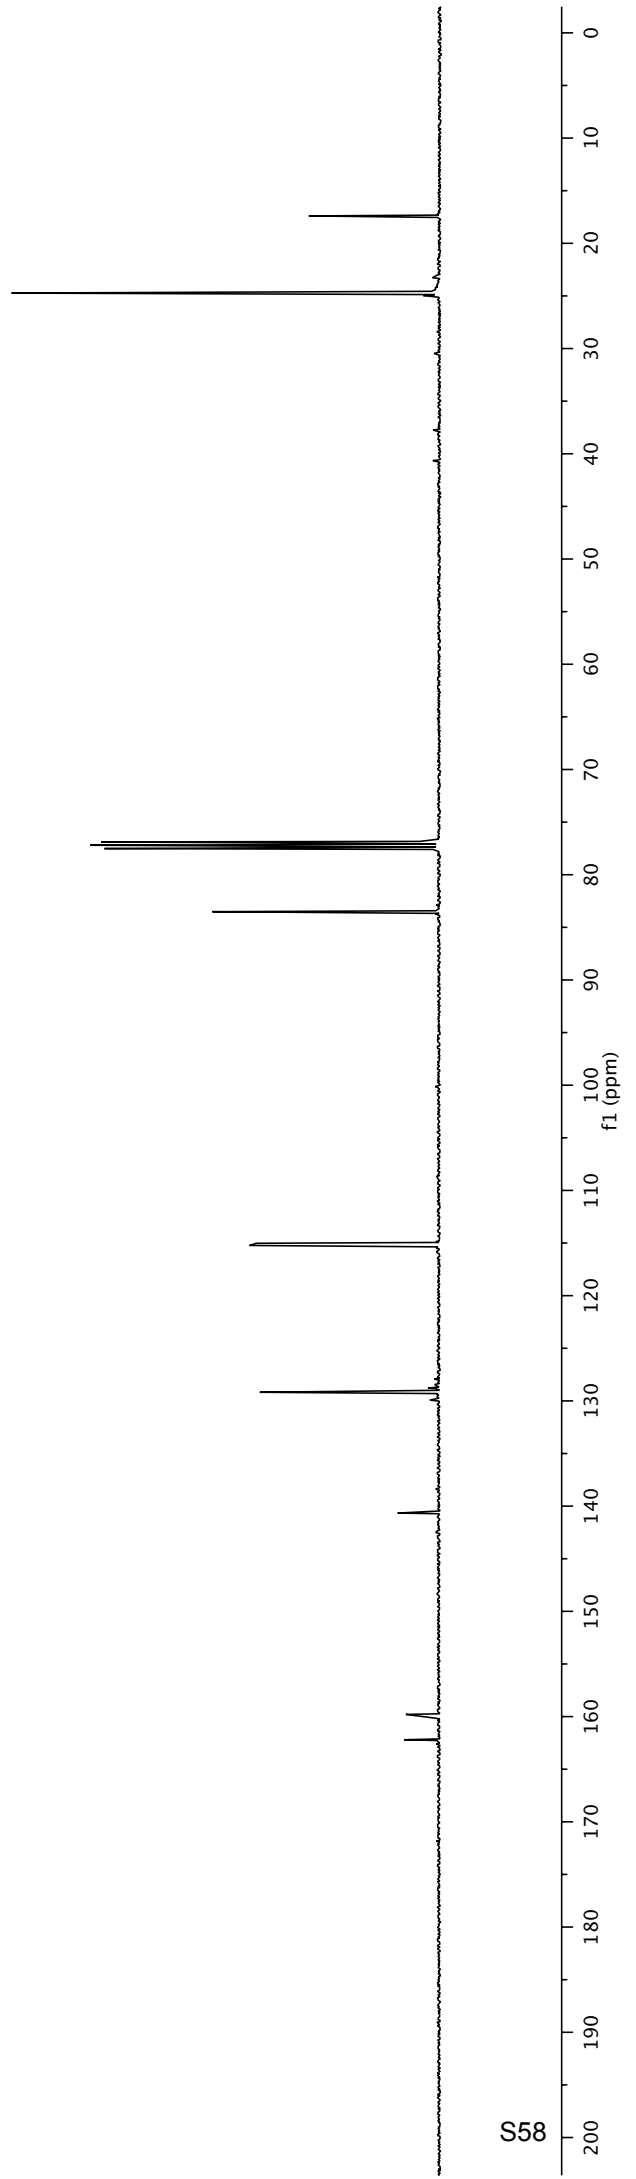

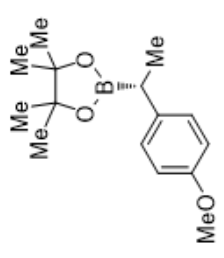

Compound 2o, <sup>1</sup>H-NMR

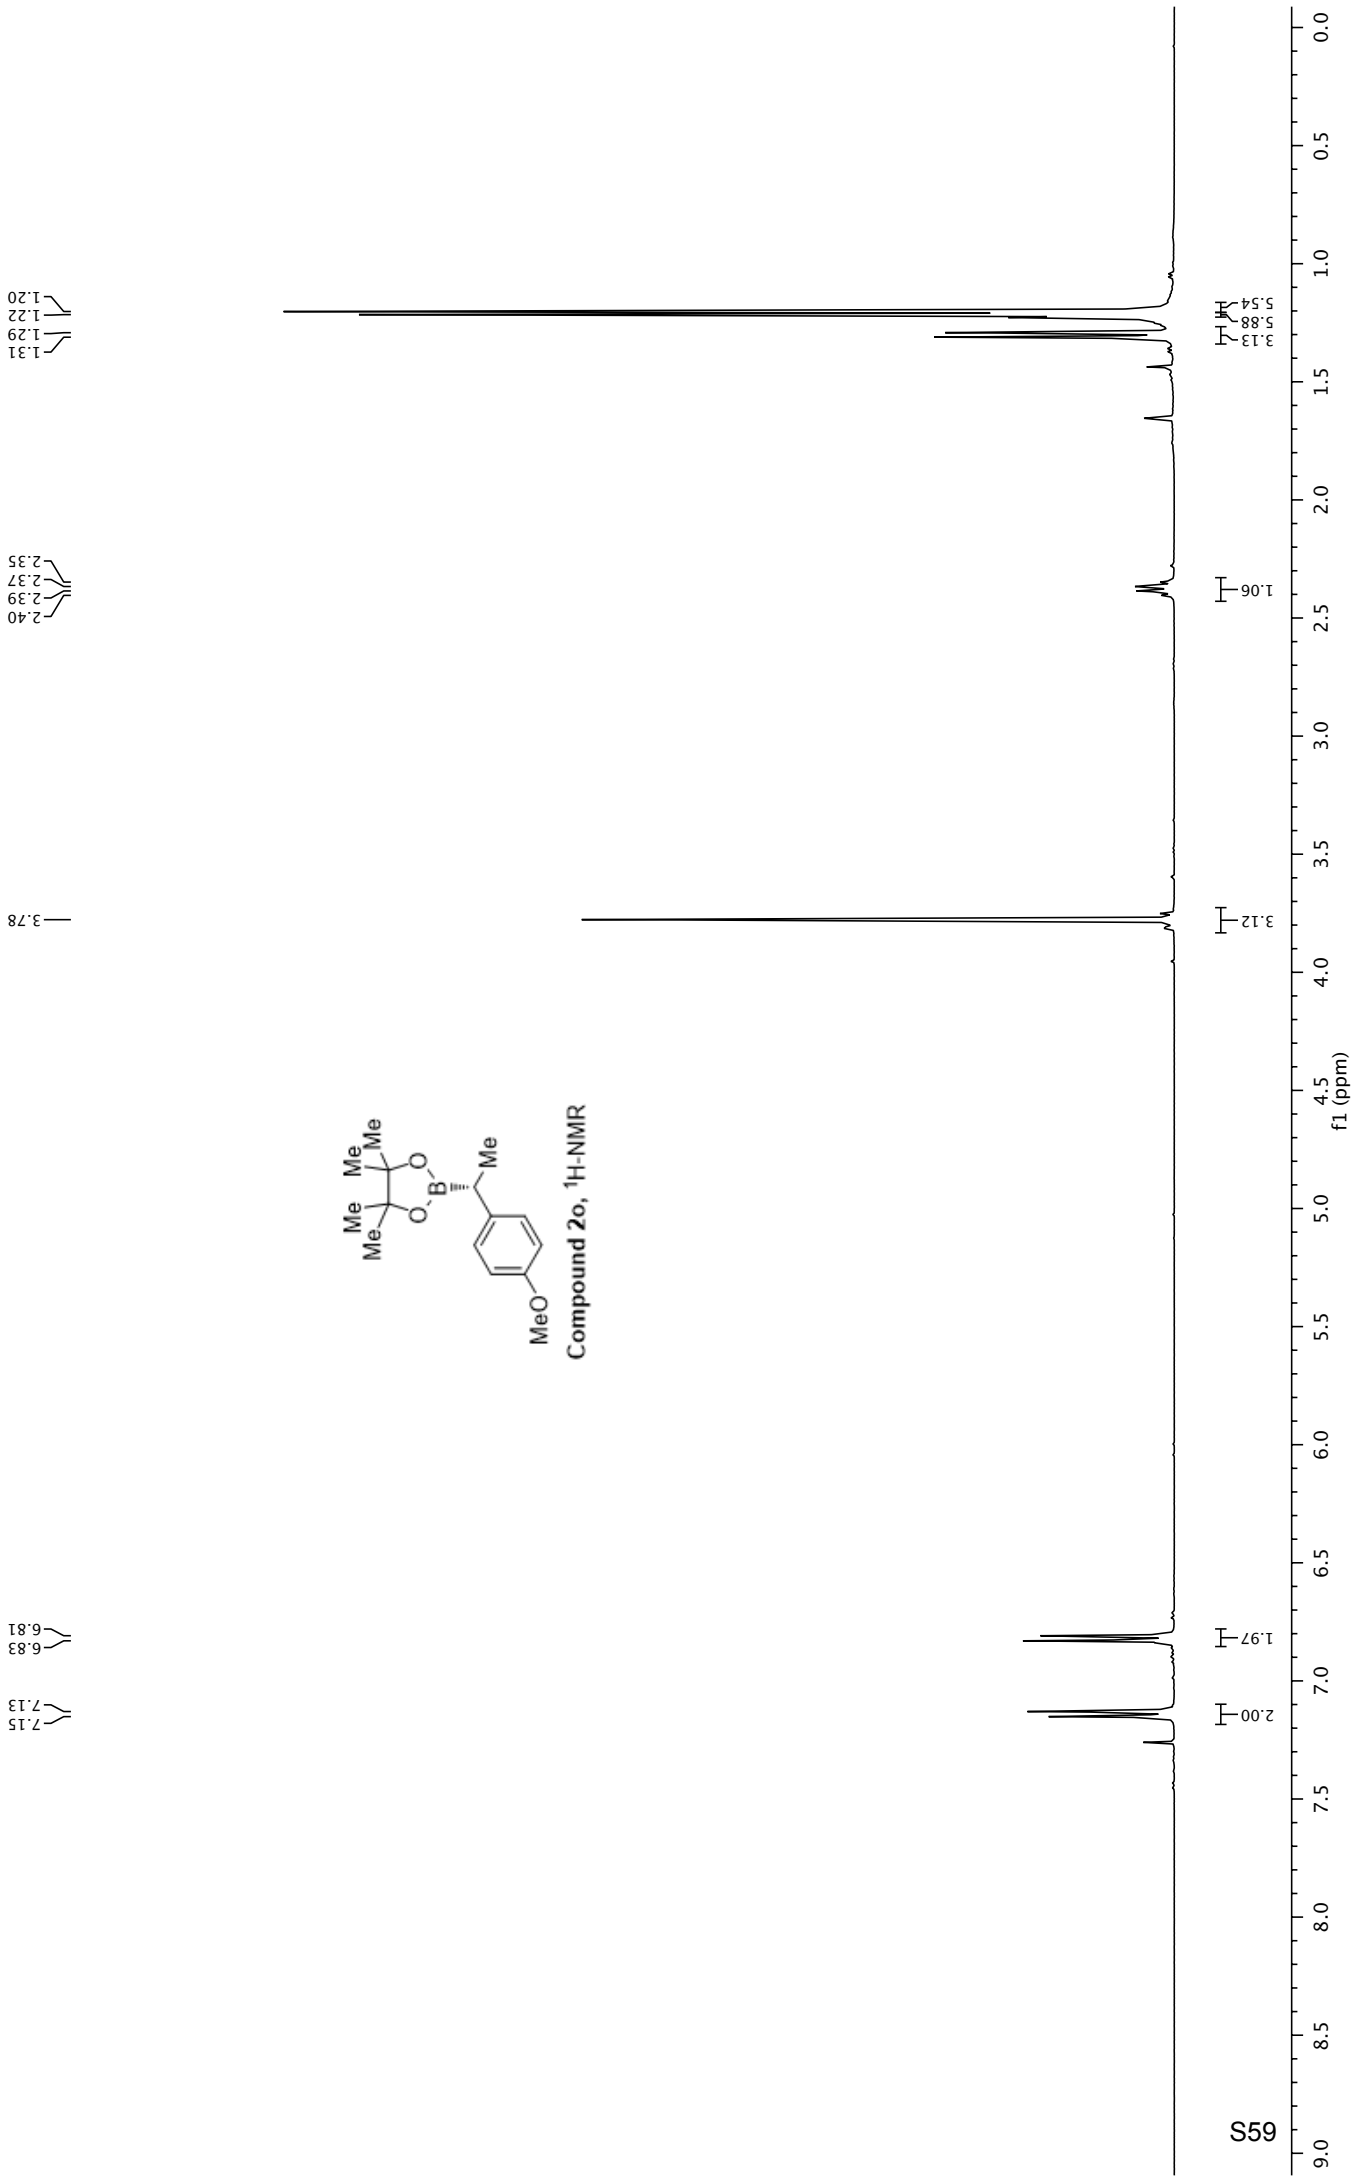

— 17.42  
— 24.65

— 55.20

— 83.24

— 113.75

— 128.63

— 136.99

— 157.21

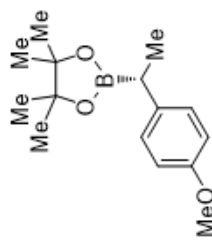Compound 2o, <sup>13</sup>C-NMR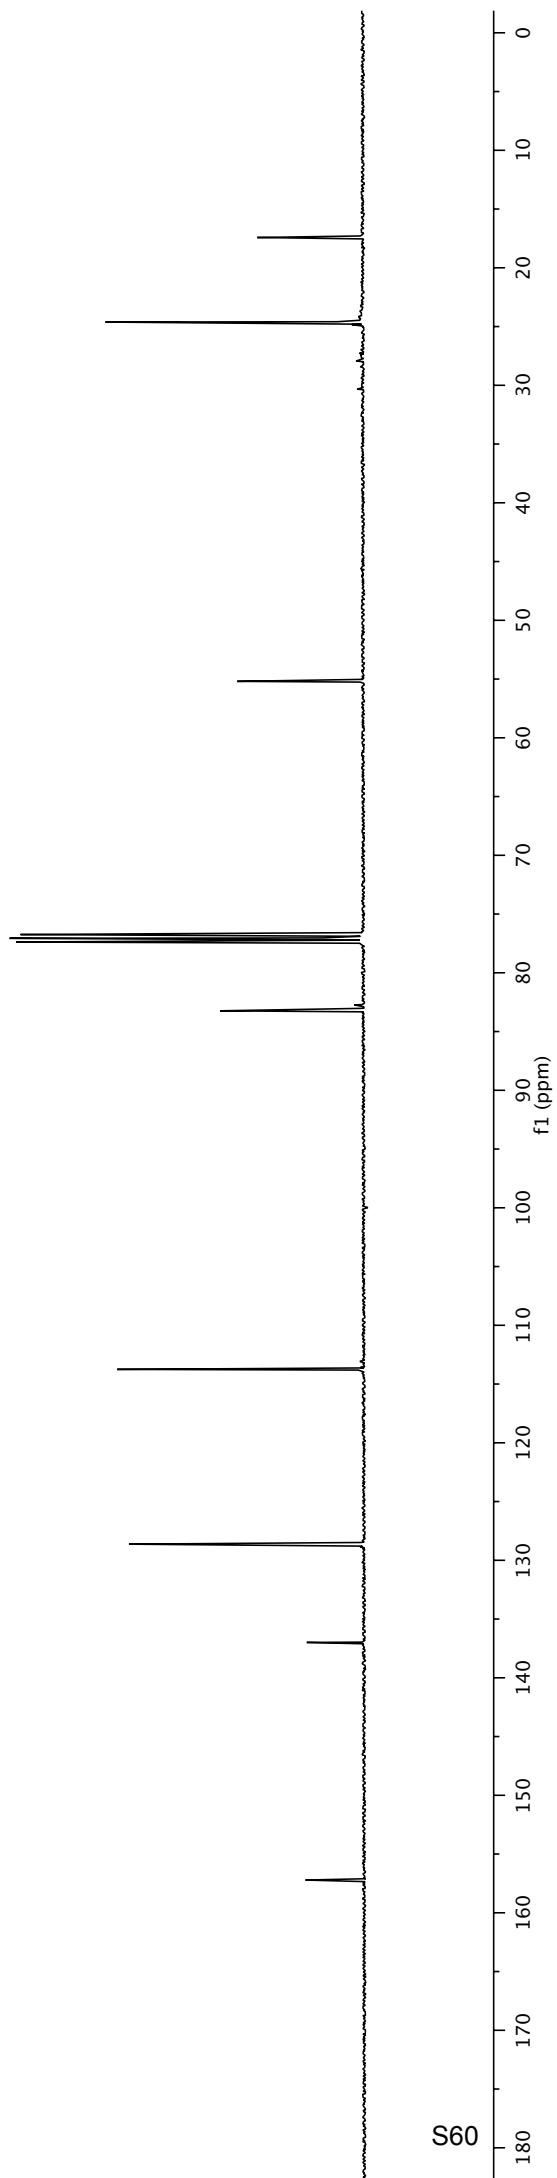

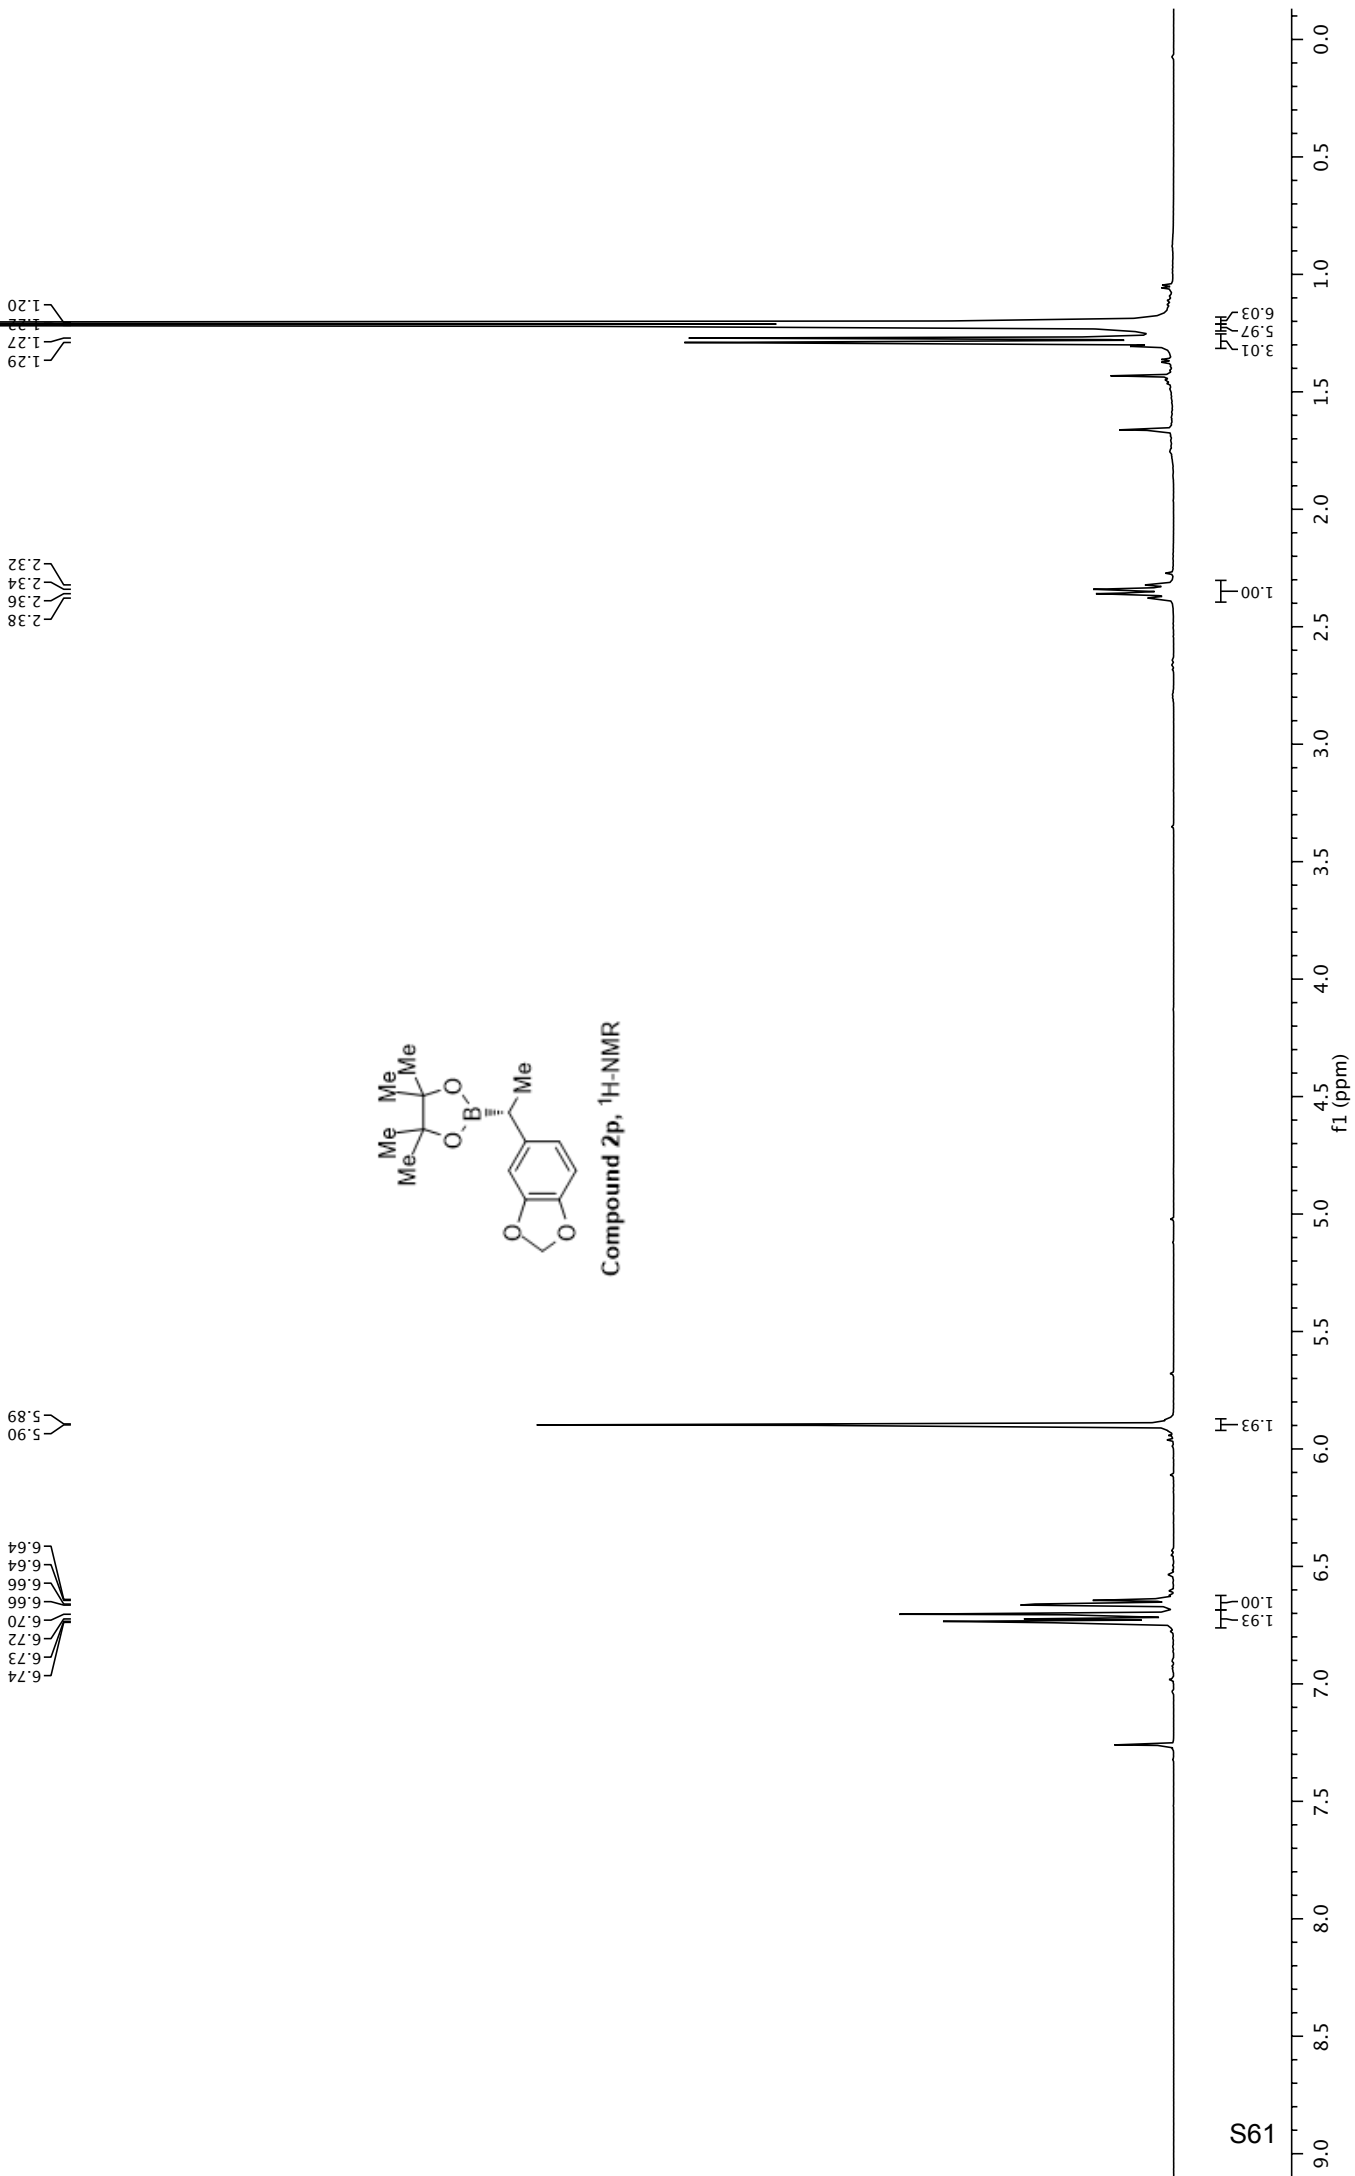

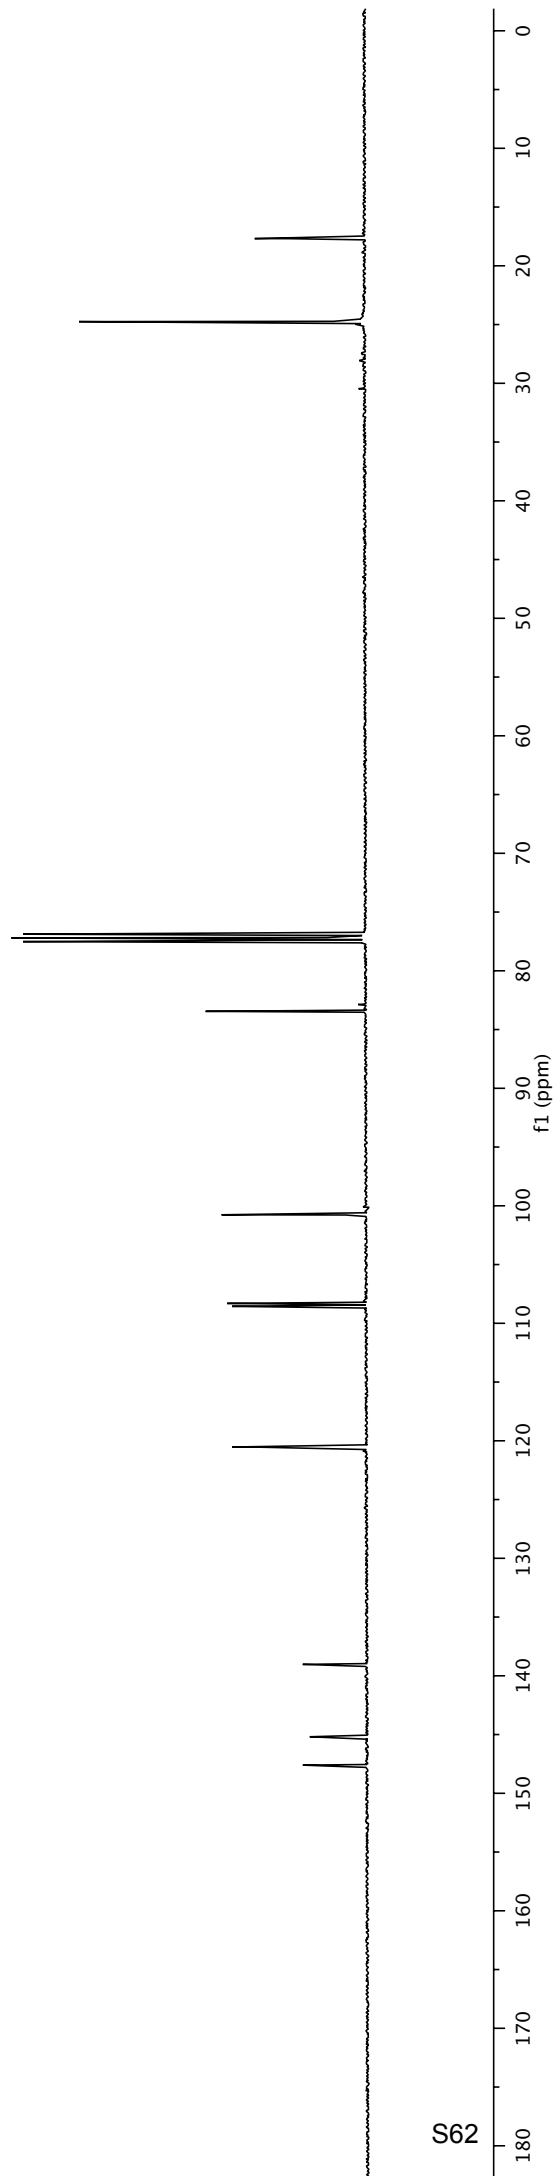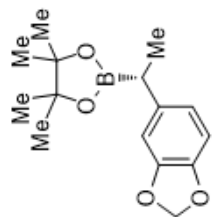Compound 2p,  $^{13}\text{C-NMR}$ 

17.68  
24.79

83.45

100.77

108.56  
108.31

120.53

139.03

145.19  
147.60

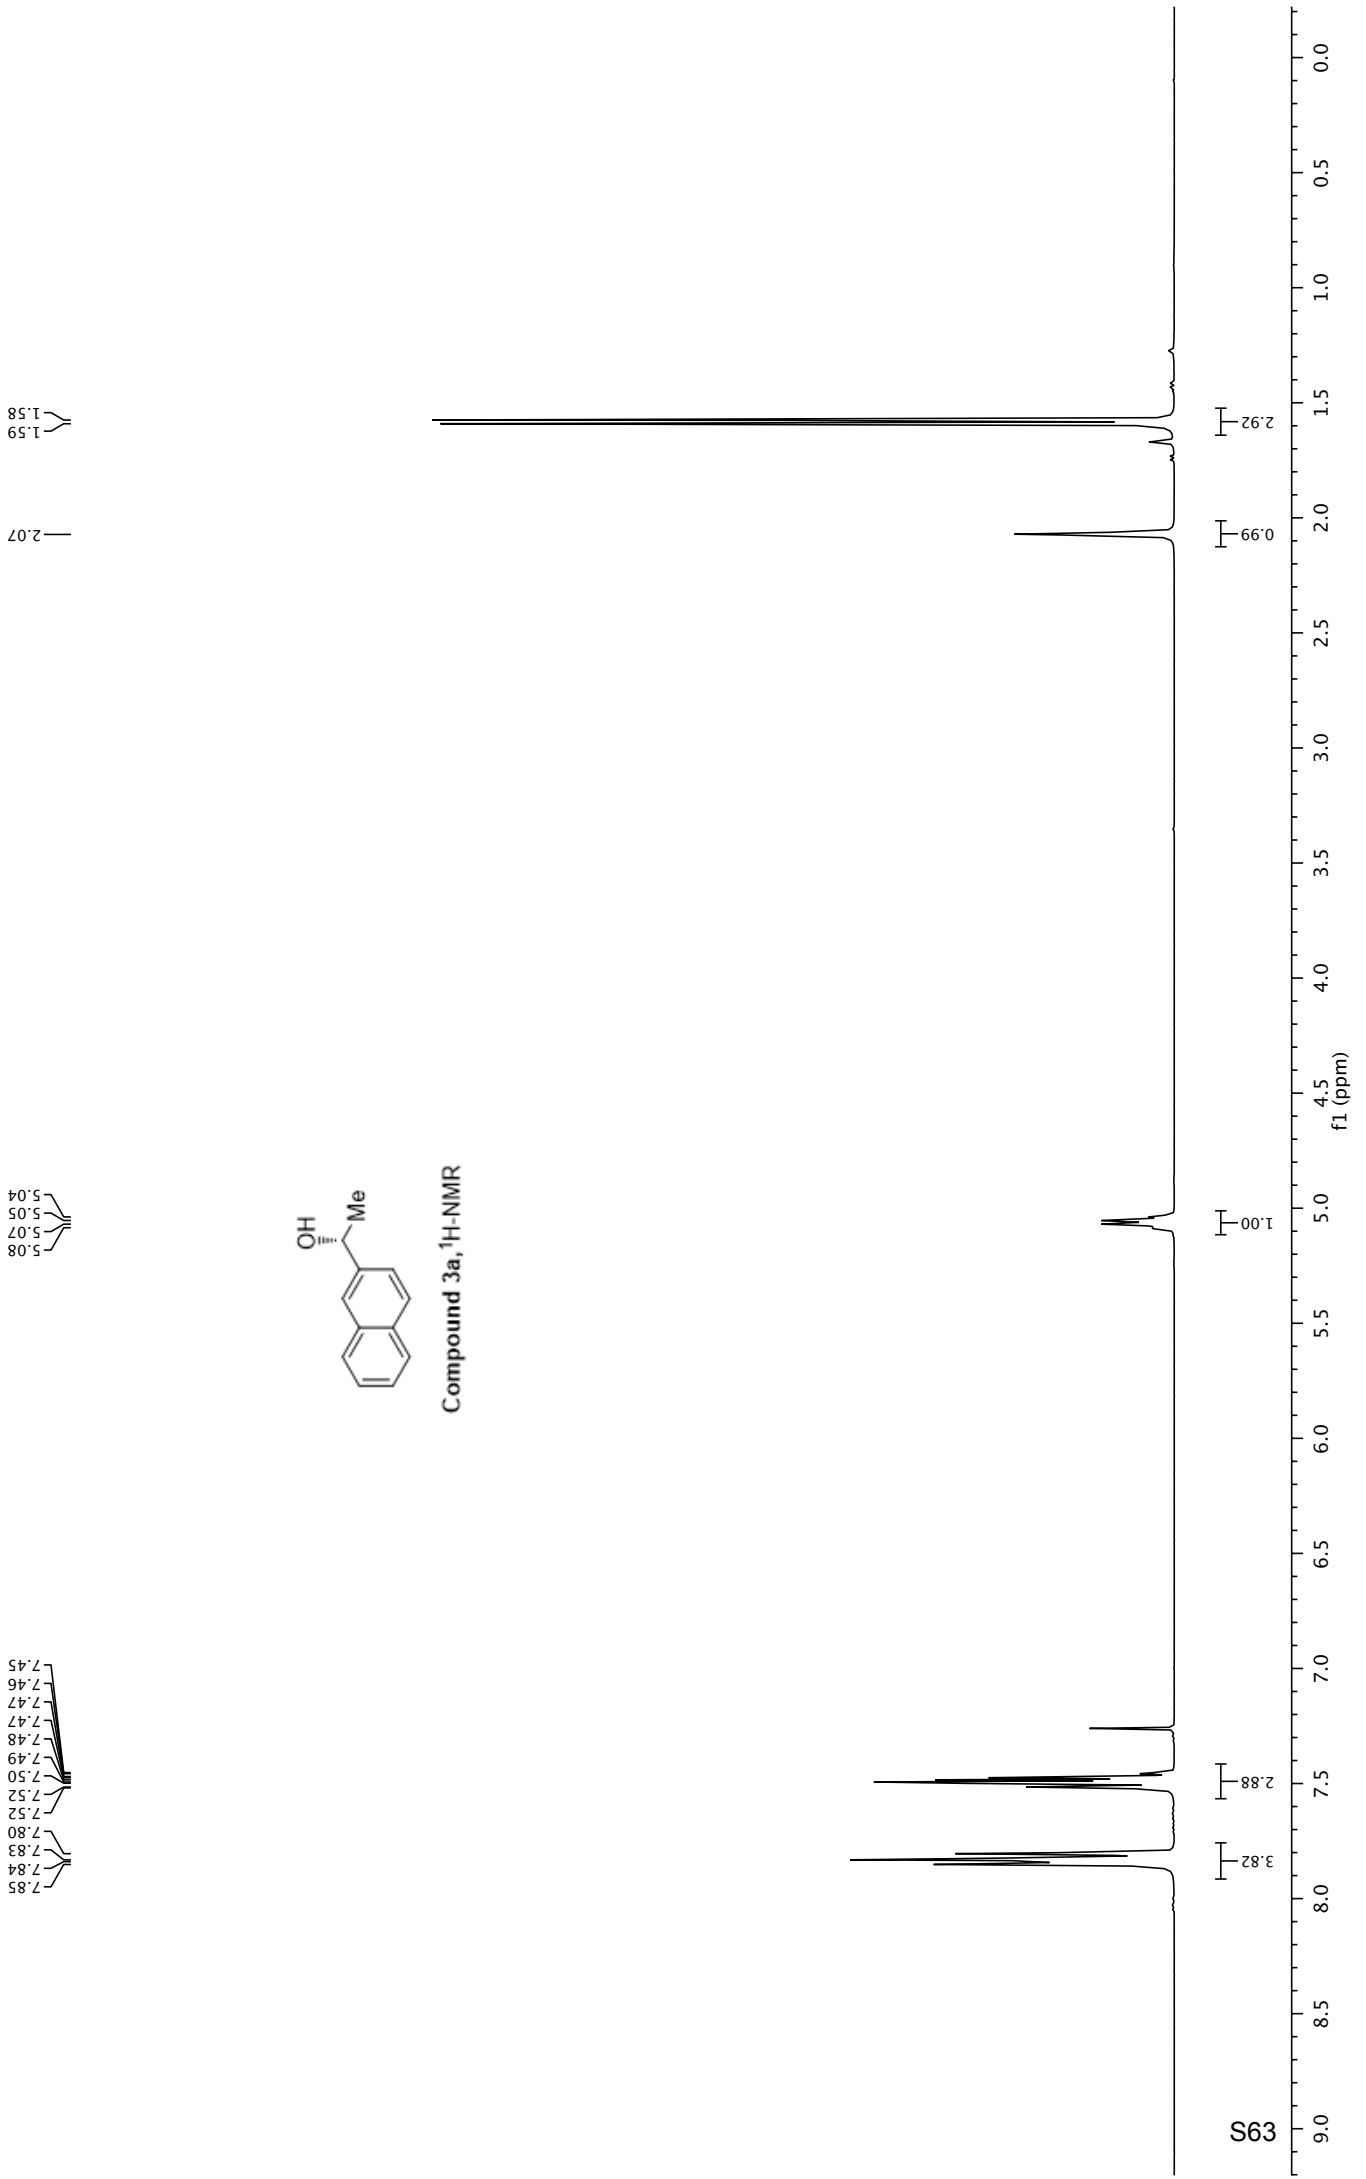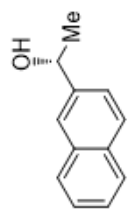

Compound 3a, 1H-NMR

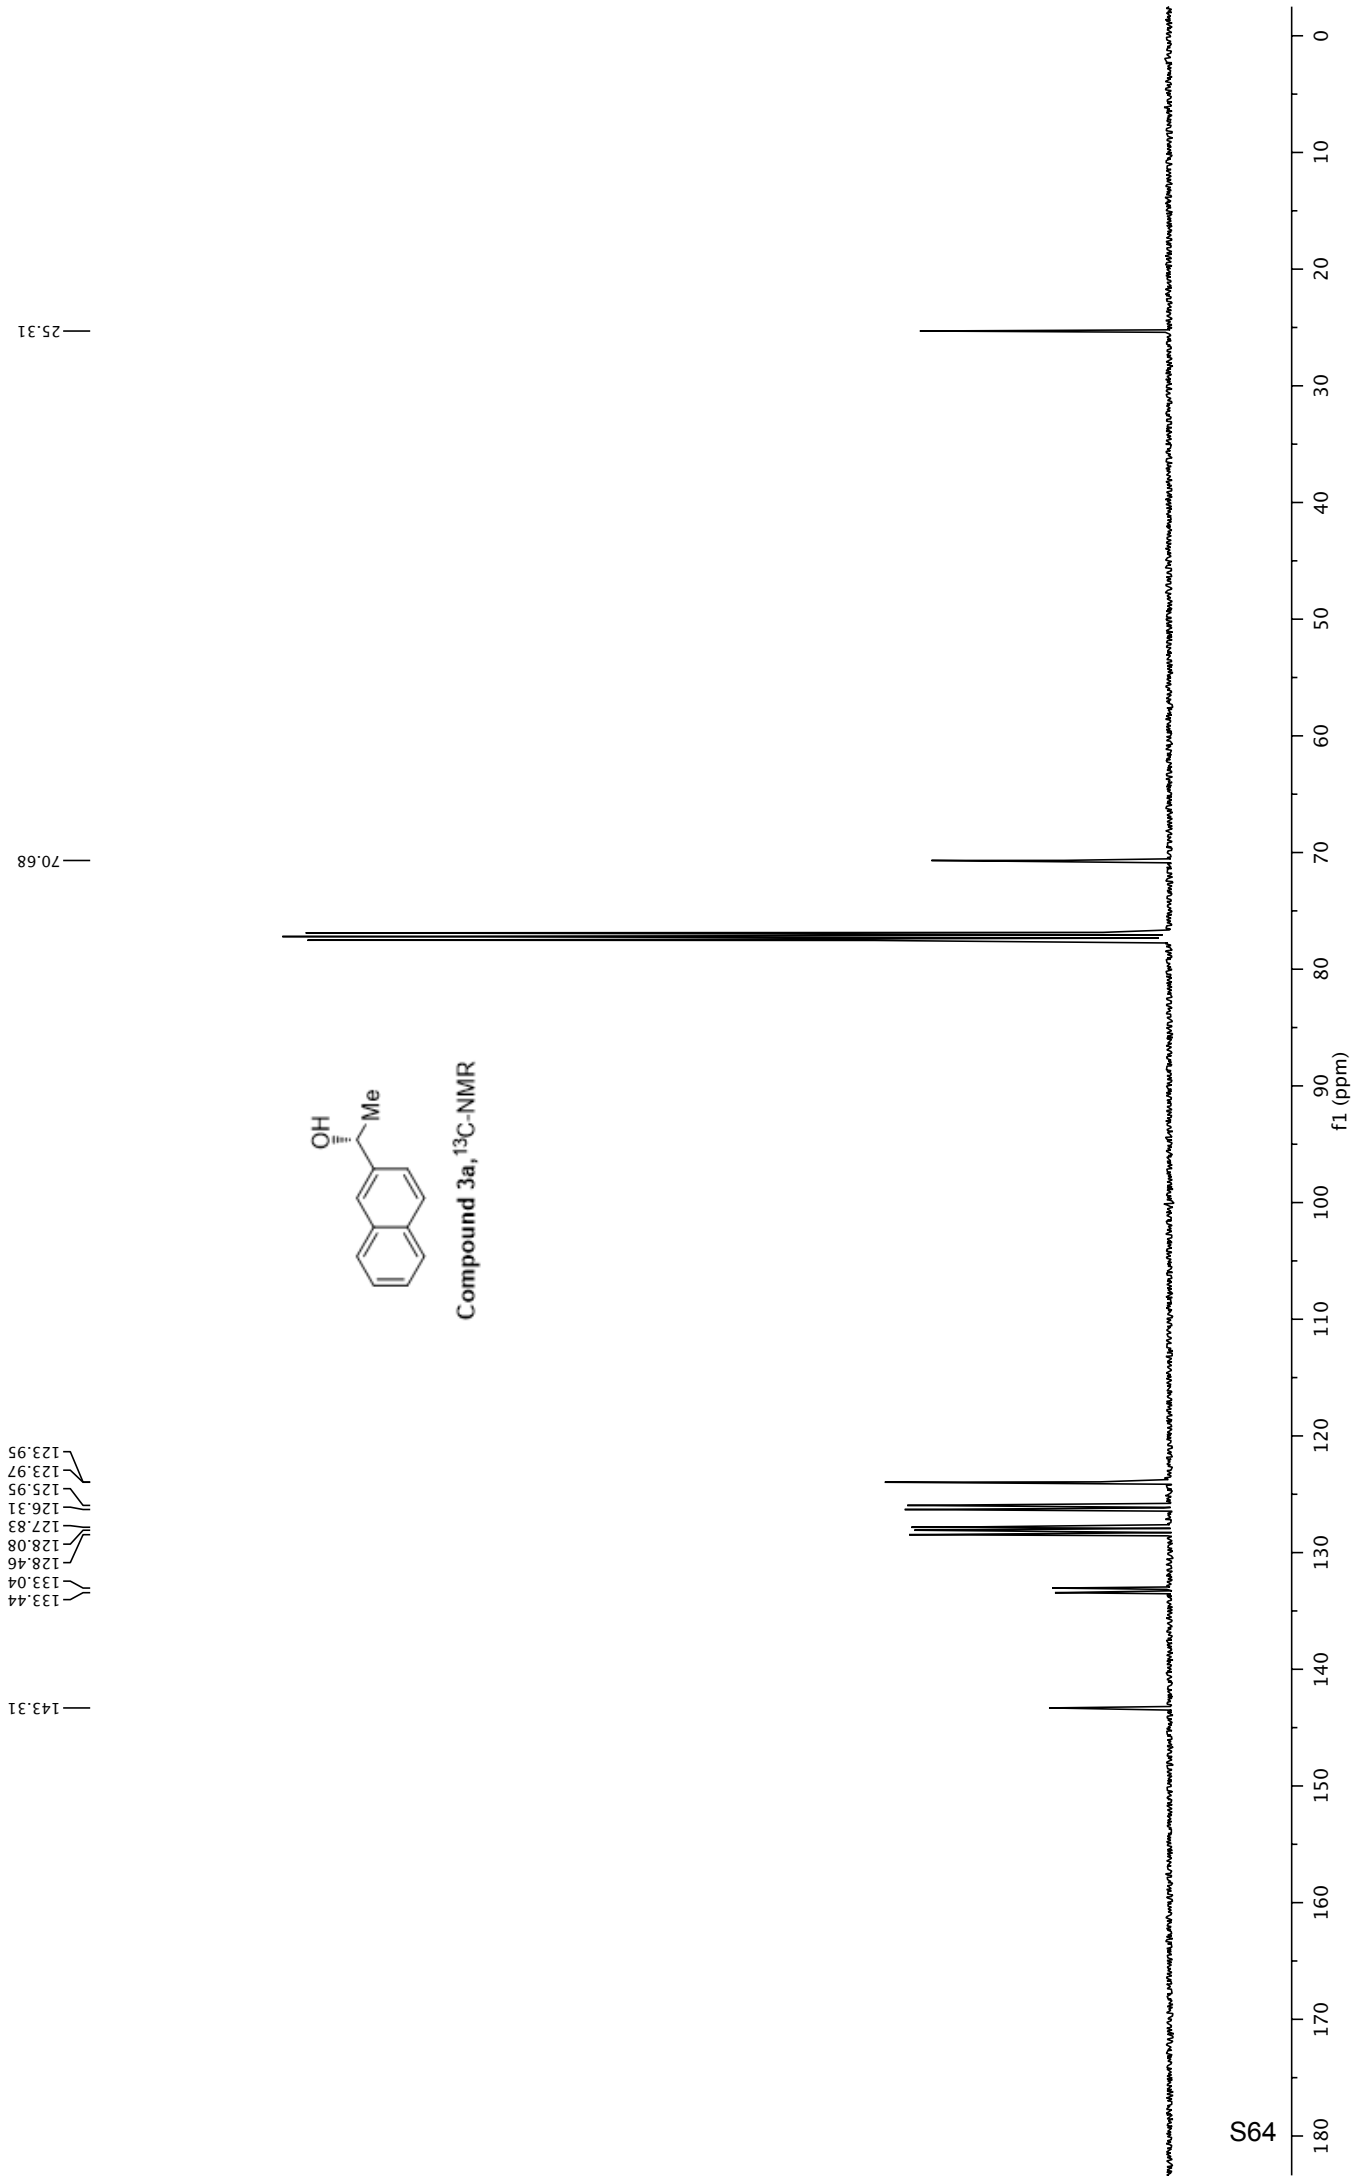



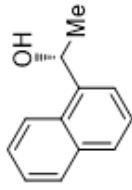

Compound 3b <sup>1</sup>H-NMR

1.96  
1.67

5.71  
5.70  
5.68  
5.67

8.13  
8.11  
7.89  
7.88  
7.80  
7.78  
7.70  
7.68  
7.55  
7.54  
7.52  
7.51  
7.49  
7.48  
7.47

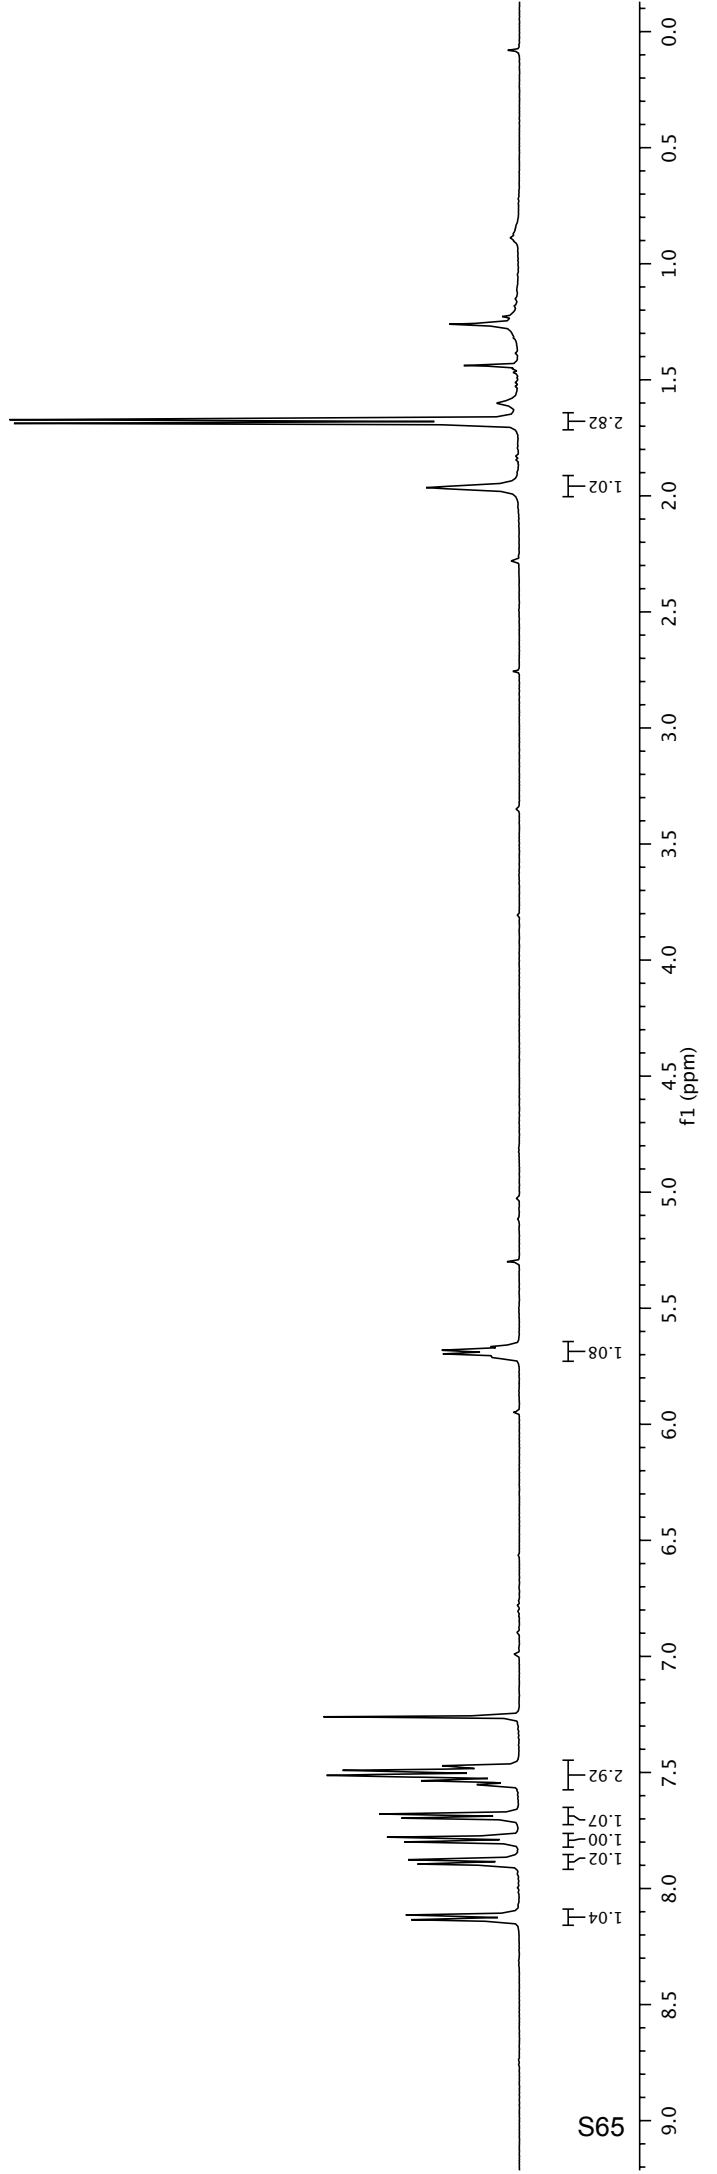

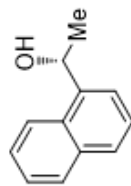

Compound 3b  $^{13}\text{C}$ -NMR

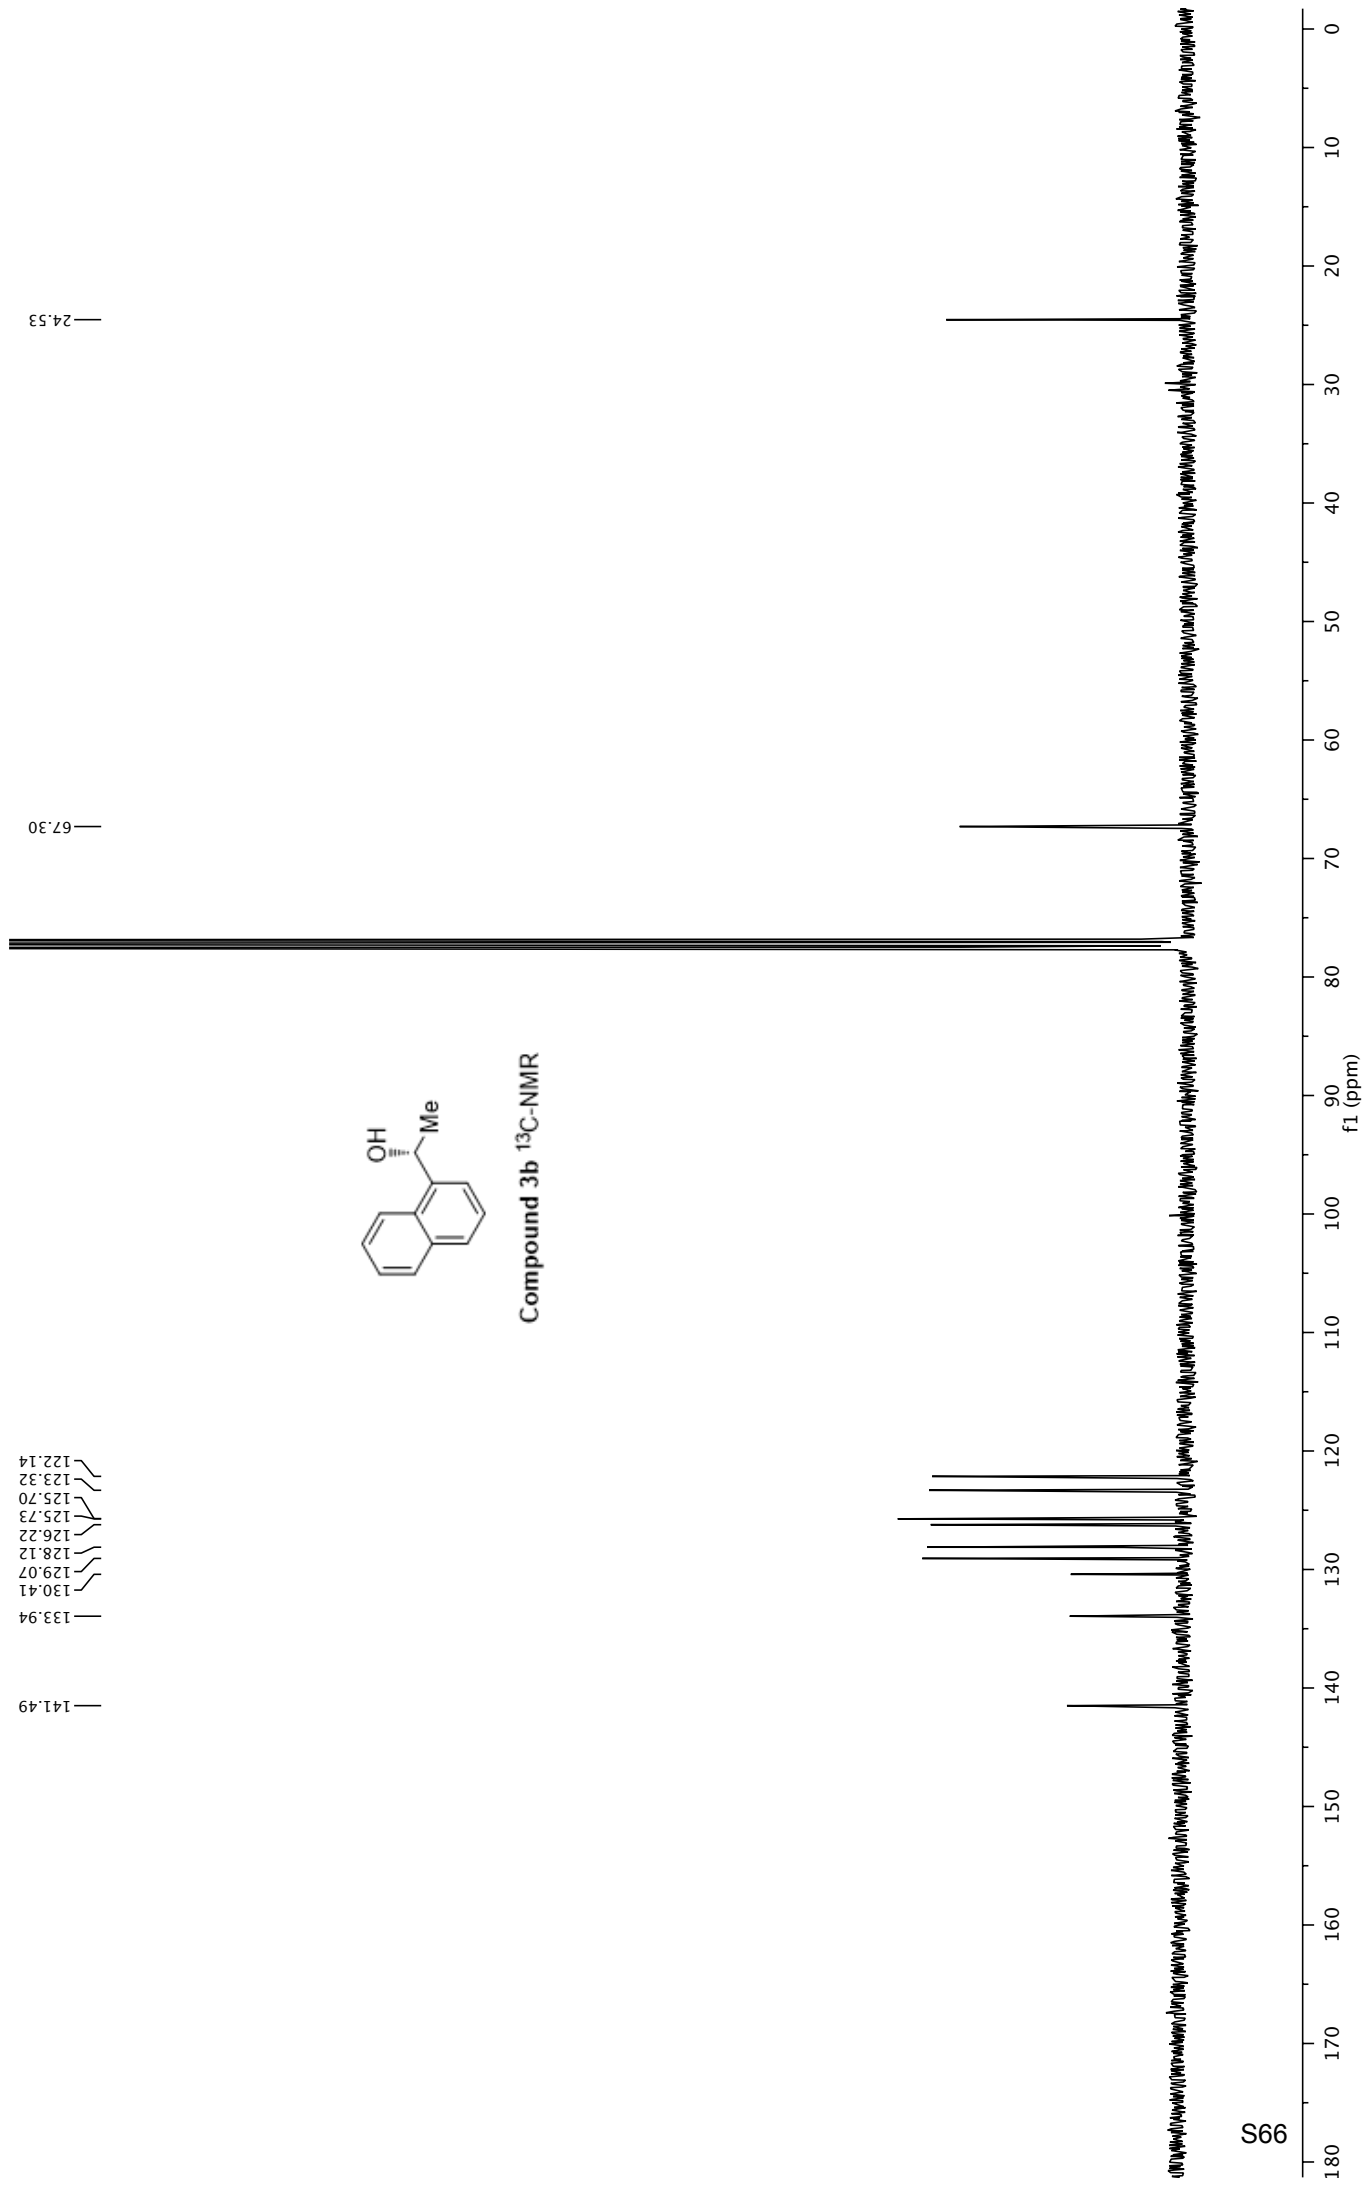

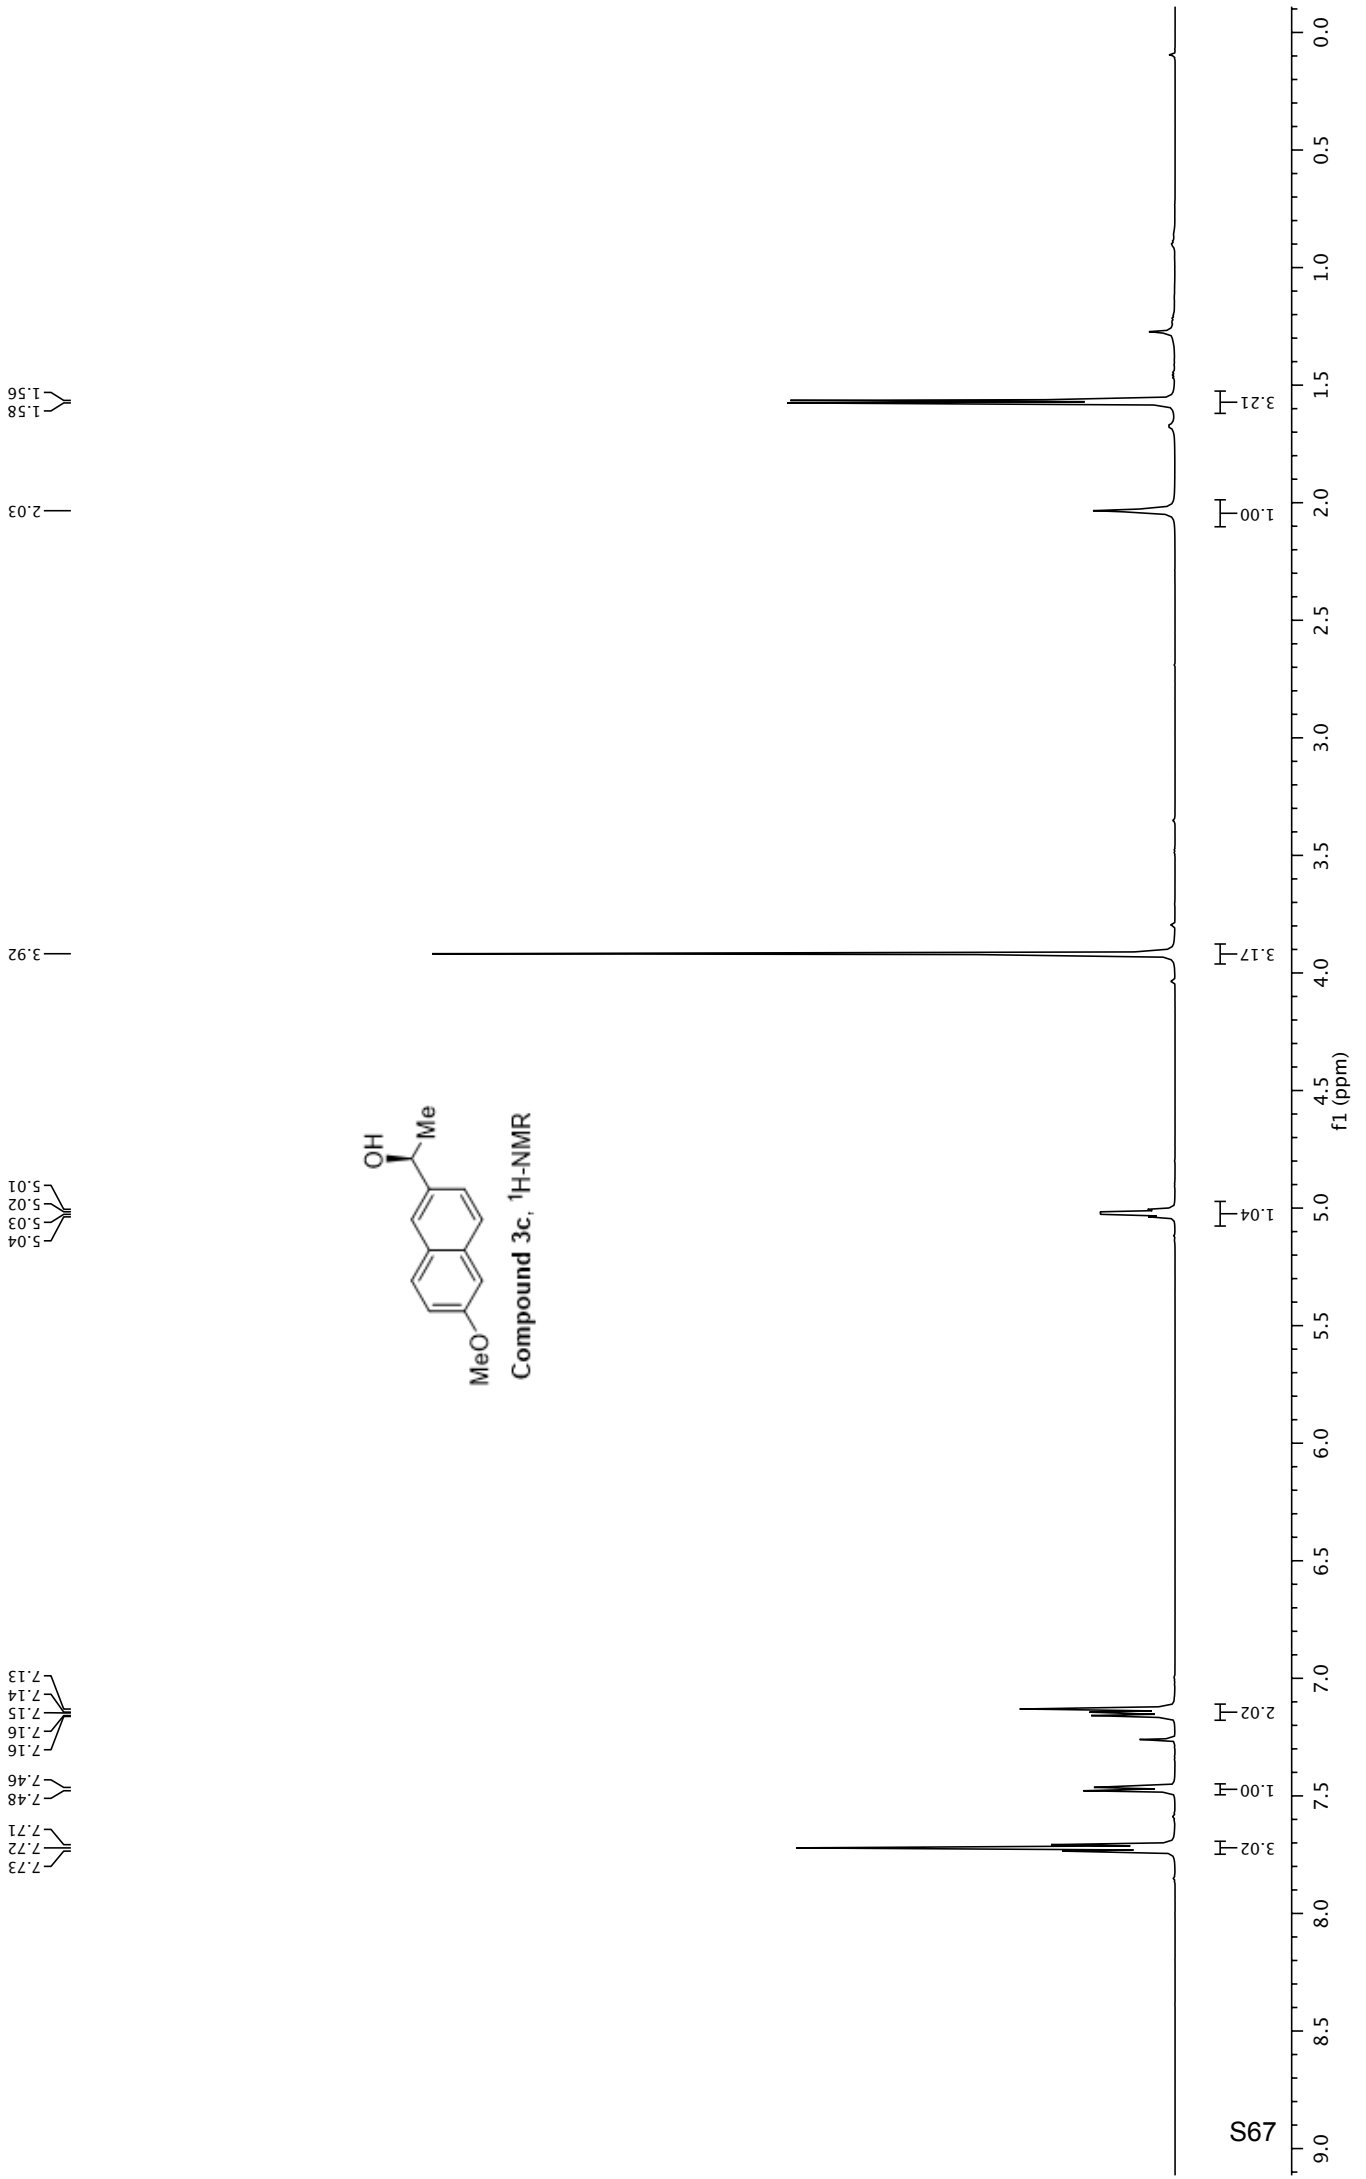

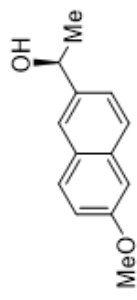

Compound 3c, <sup>13</sup>C-NMR

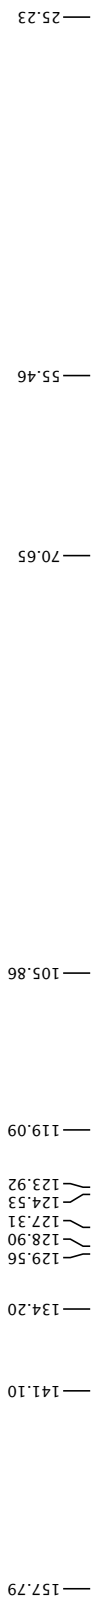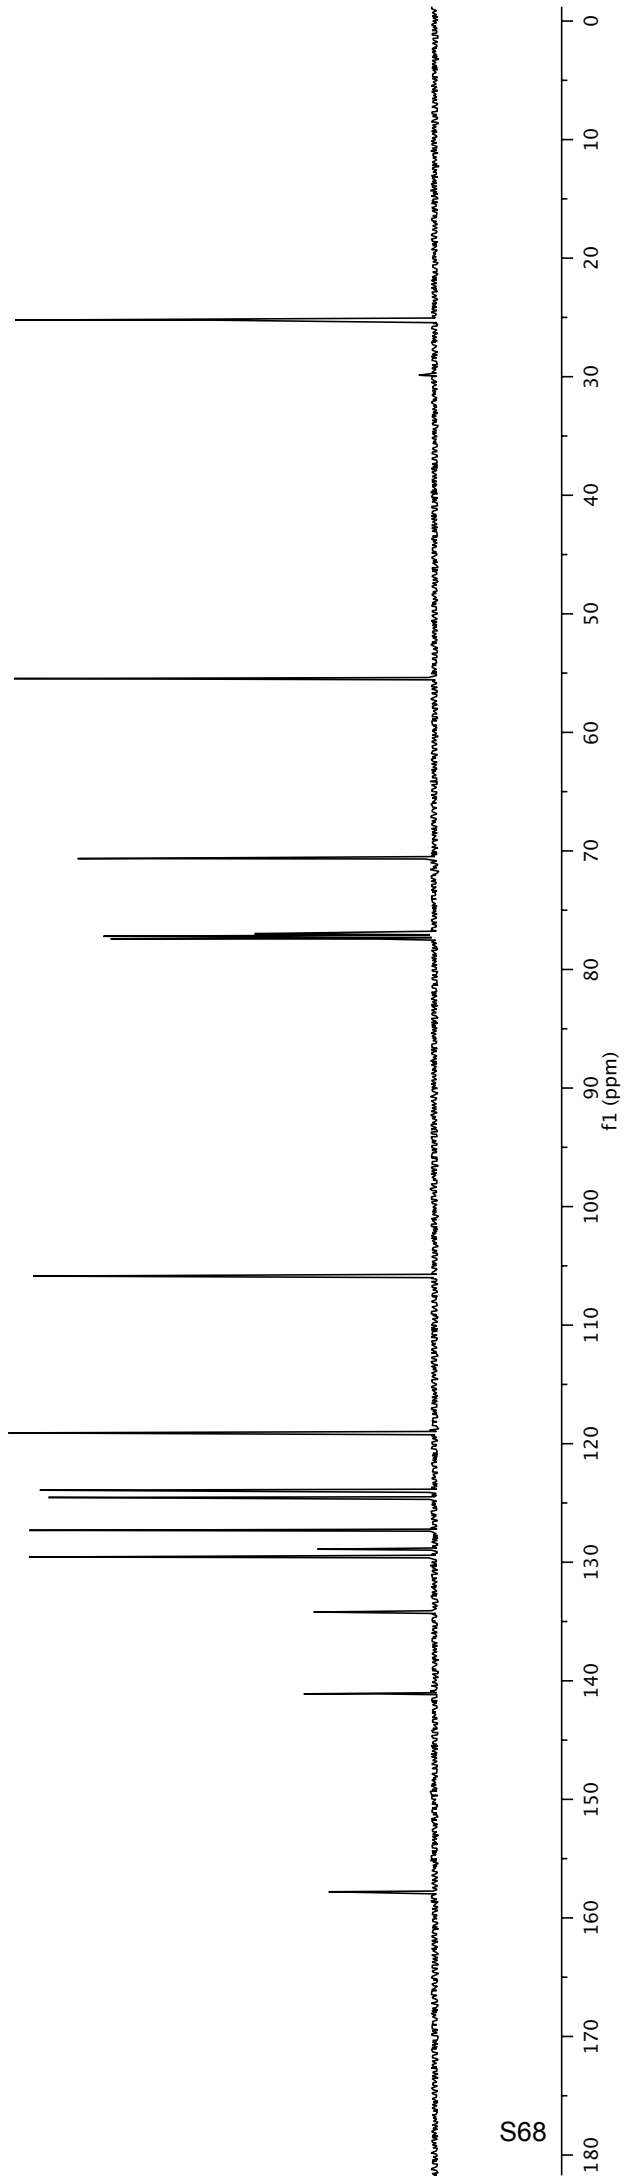



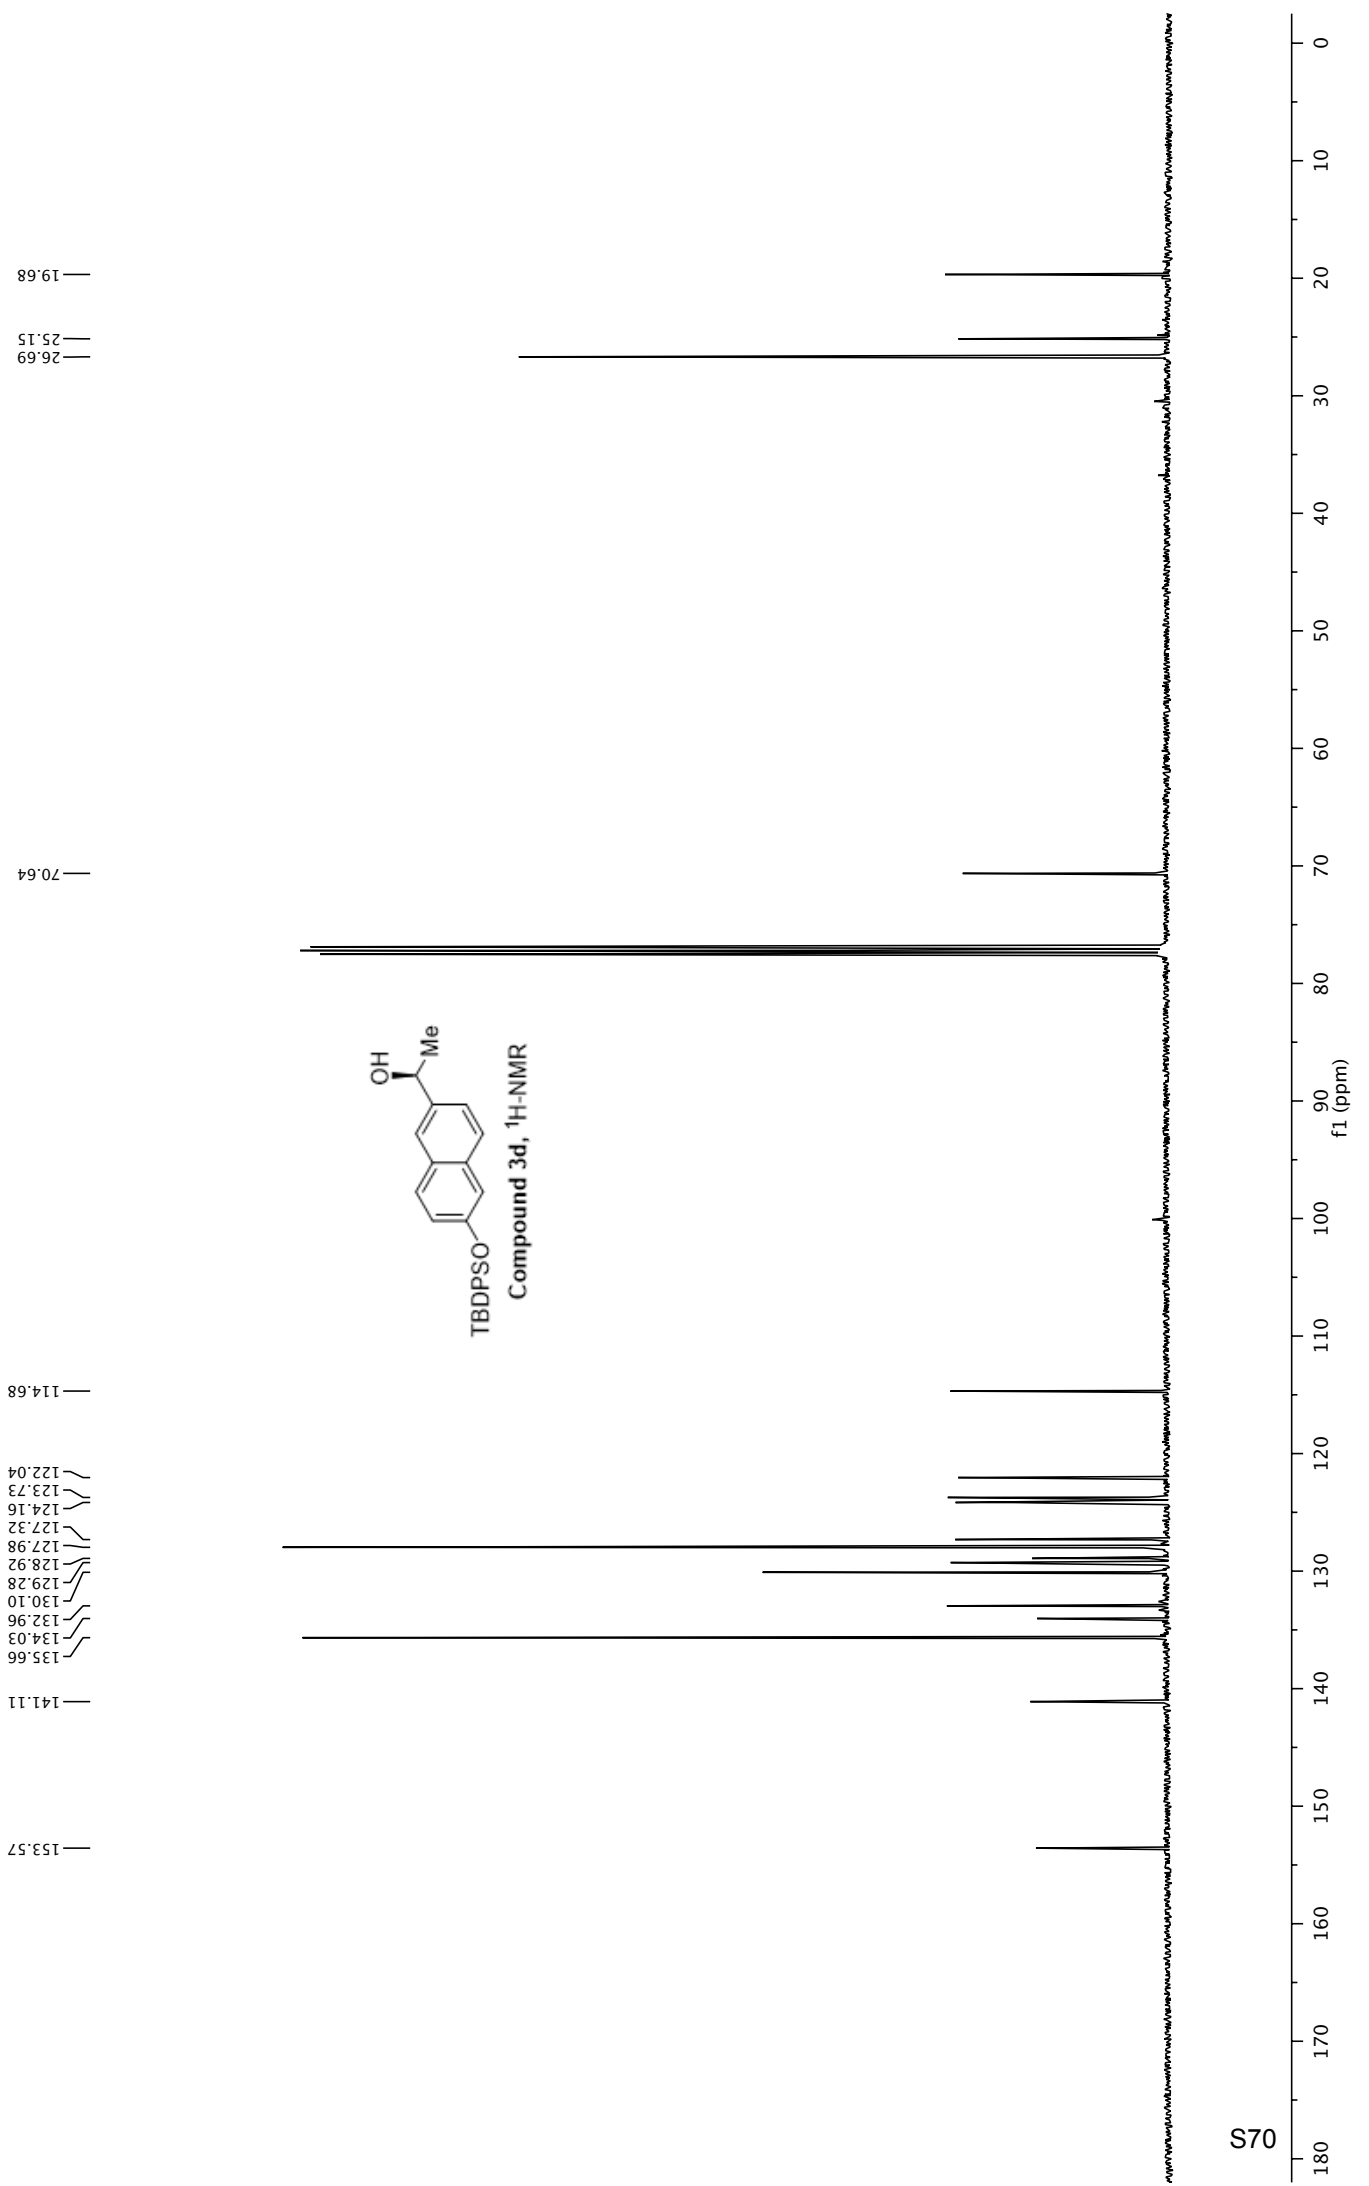

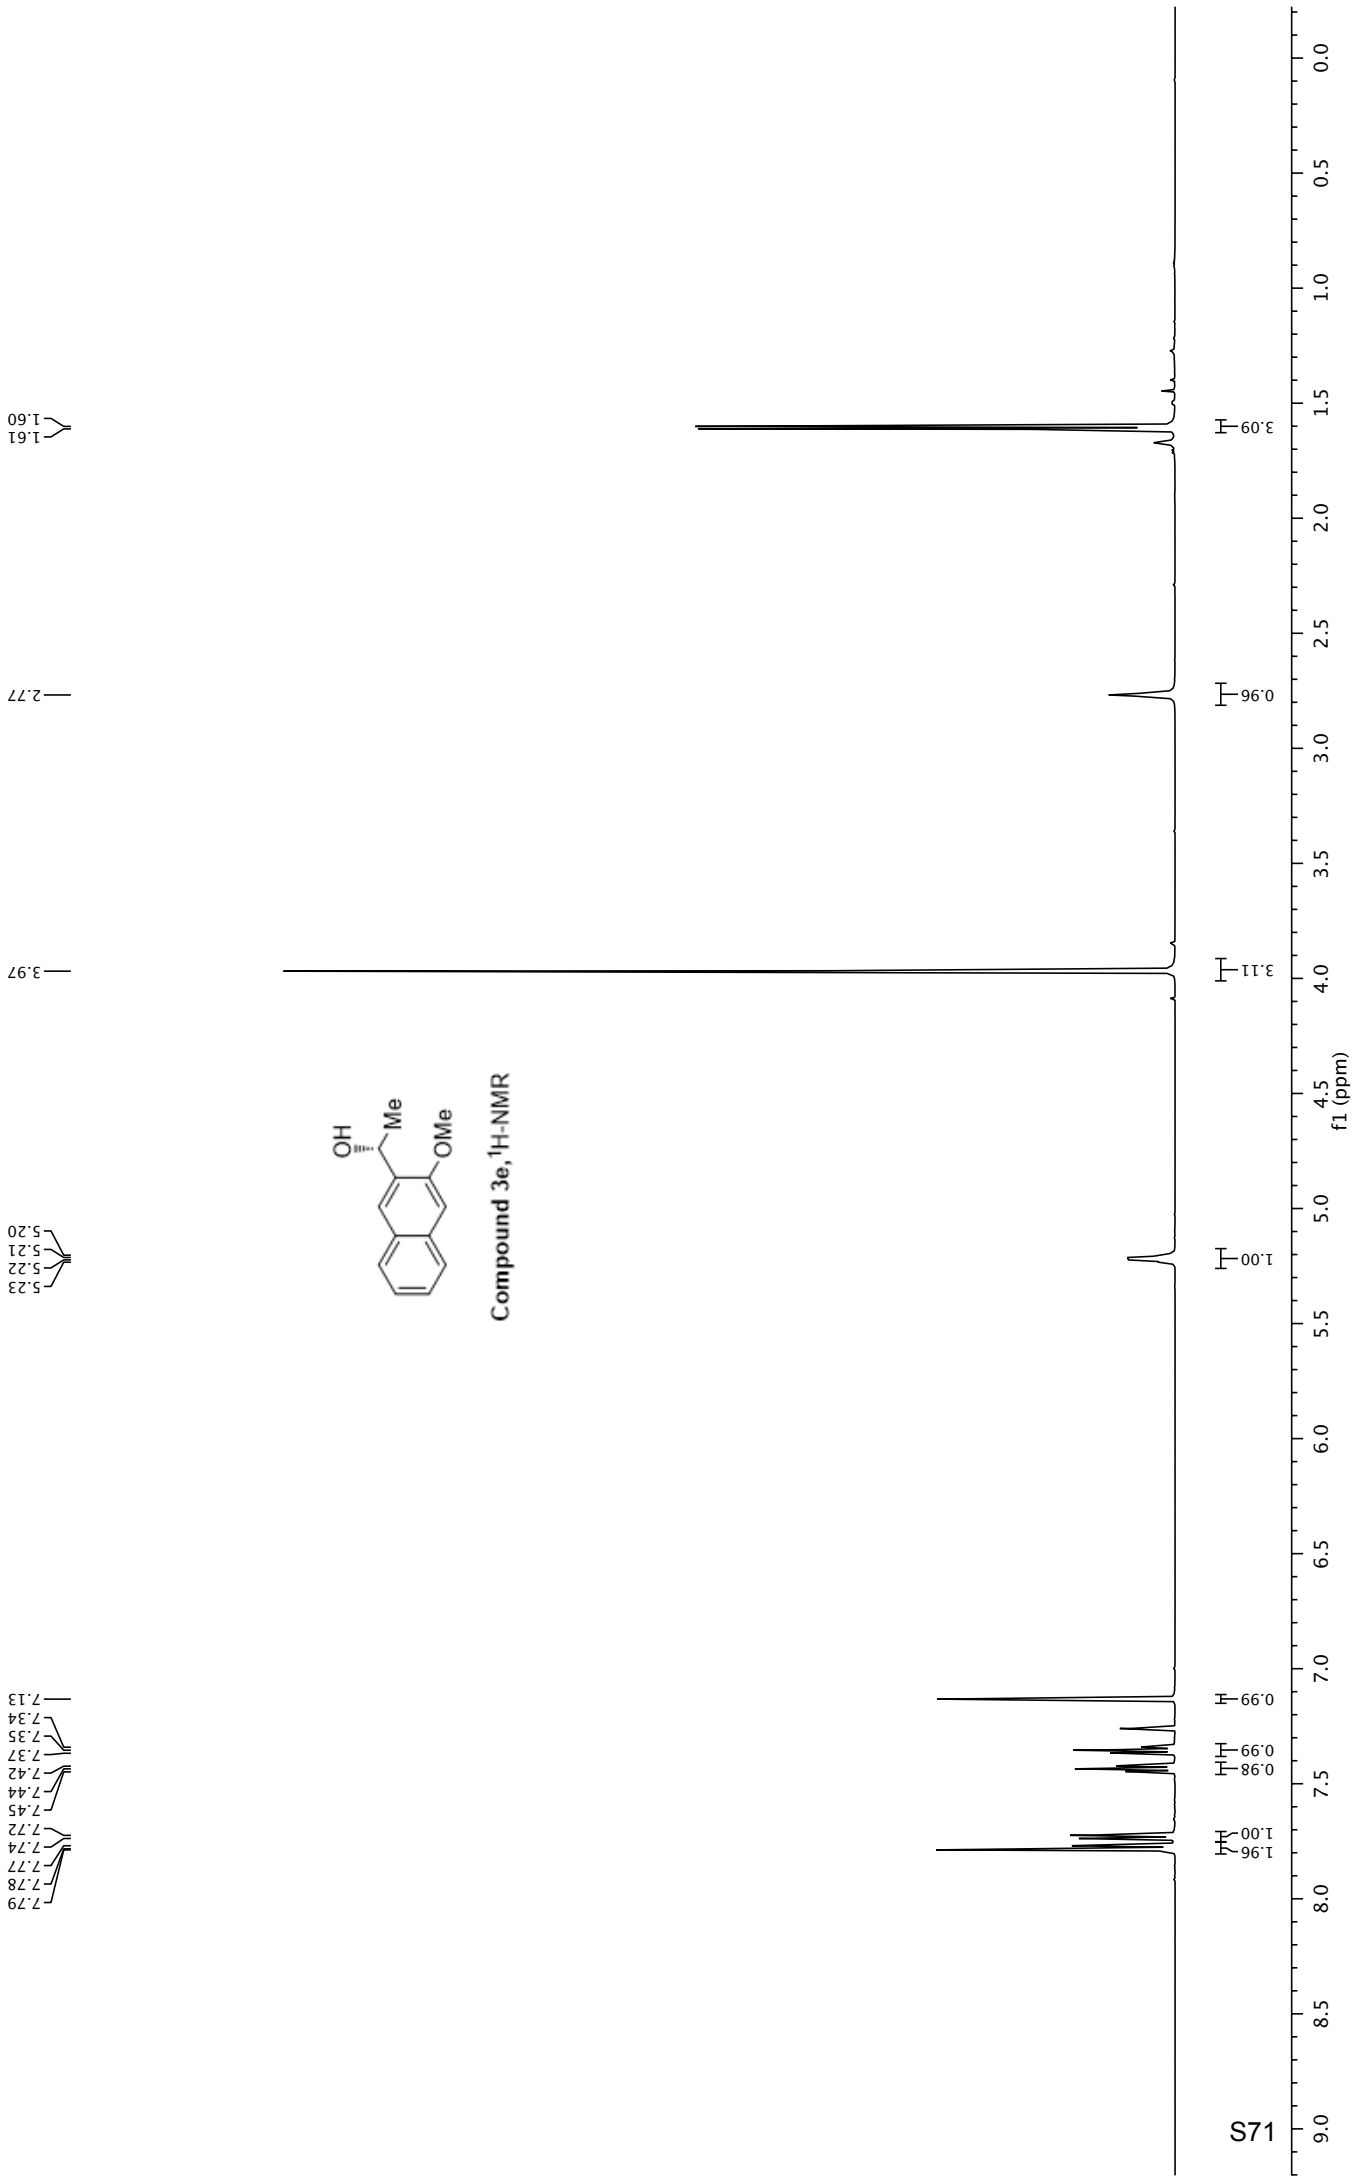

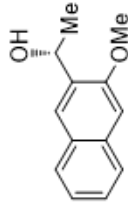

Compound 3e, <sup>13</sup>C-NMR

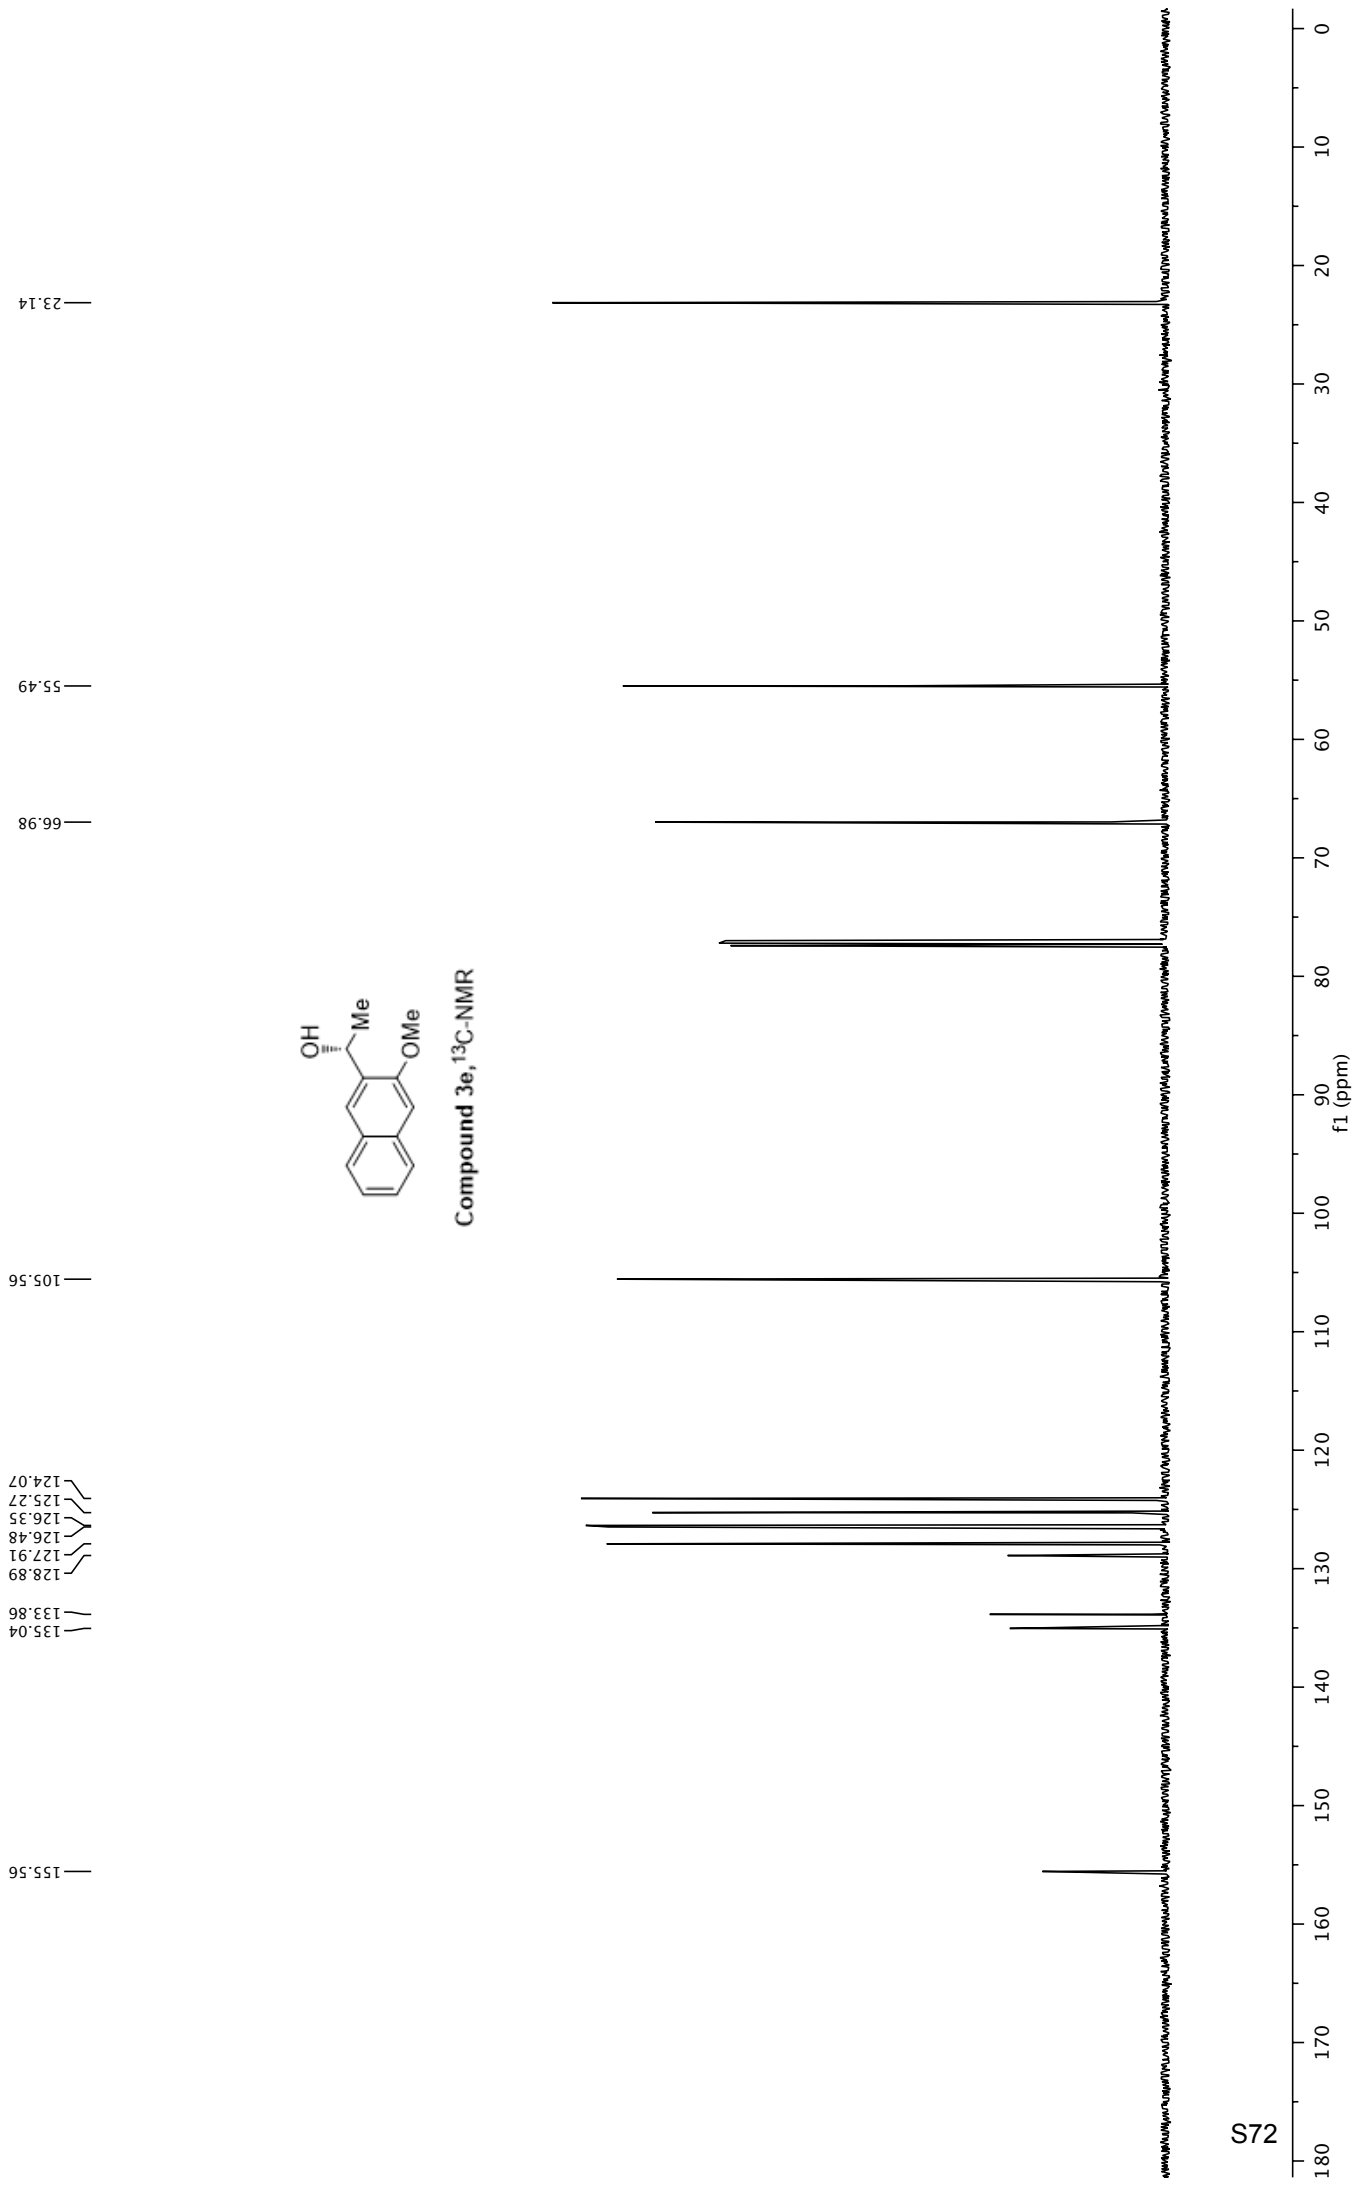



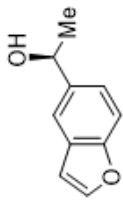

Compound 3f, <sup>1</sup>H-NMR

1.55  
1.53

1.93  
1.92

5.03  
5.02  
5.00  
4.98

6.76  
6.76  
6.76  
6.75

7.63  
7.63  
7.62  
7.61  
7.61  
7.49  
7.47  
7.33  
7.33  
7.33  
7.31  
7.30

2.96

1.08

1.04

1.01

1.00

1.01

1.94

S73

f1 (ppm)

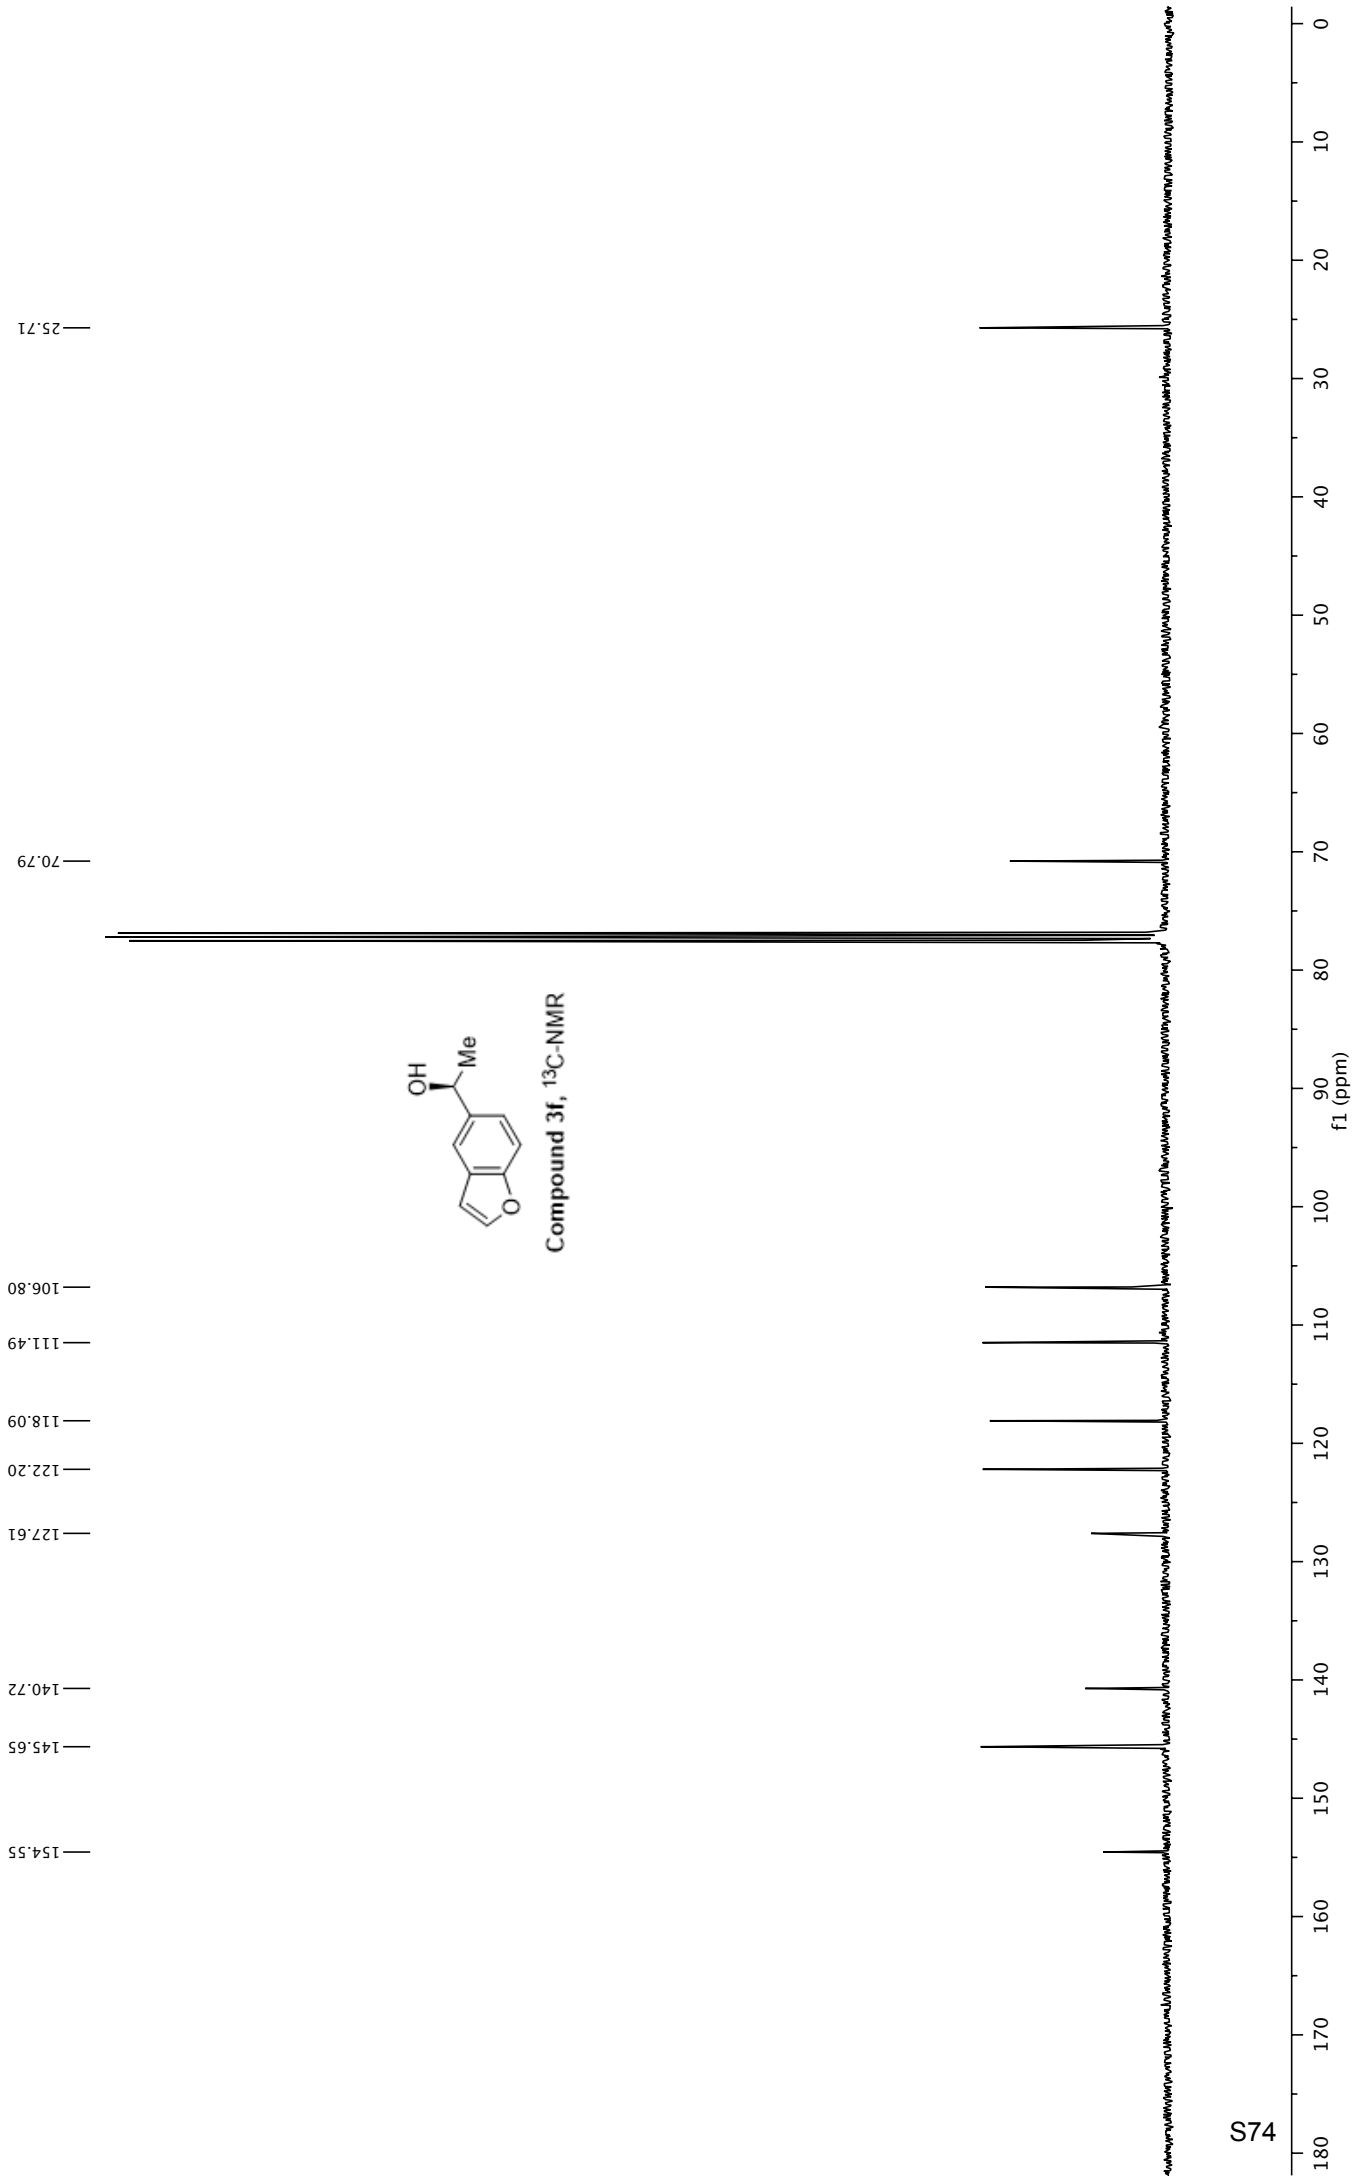

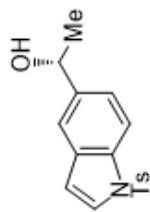

Compound 3g, <sup>1</sup>H-NMR

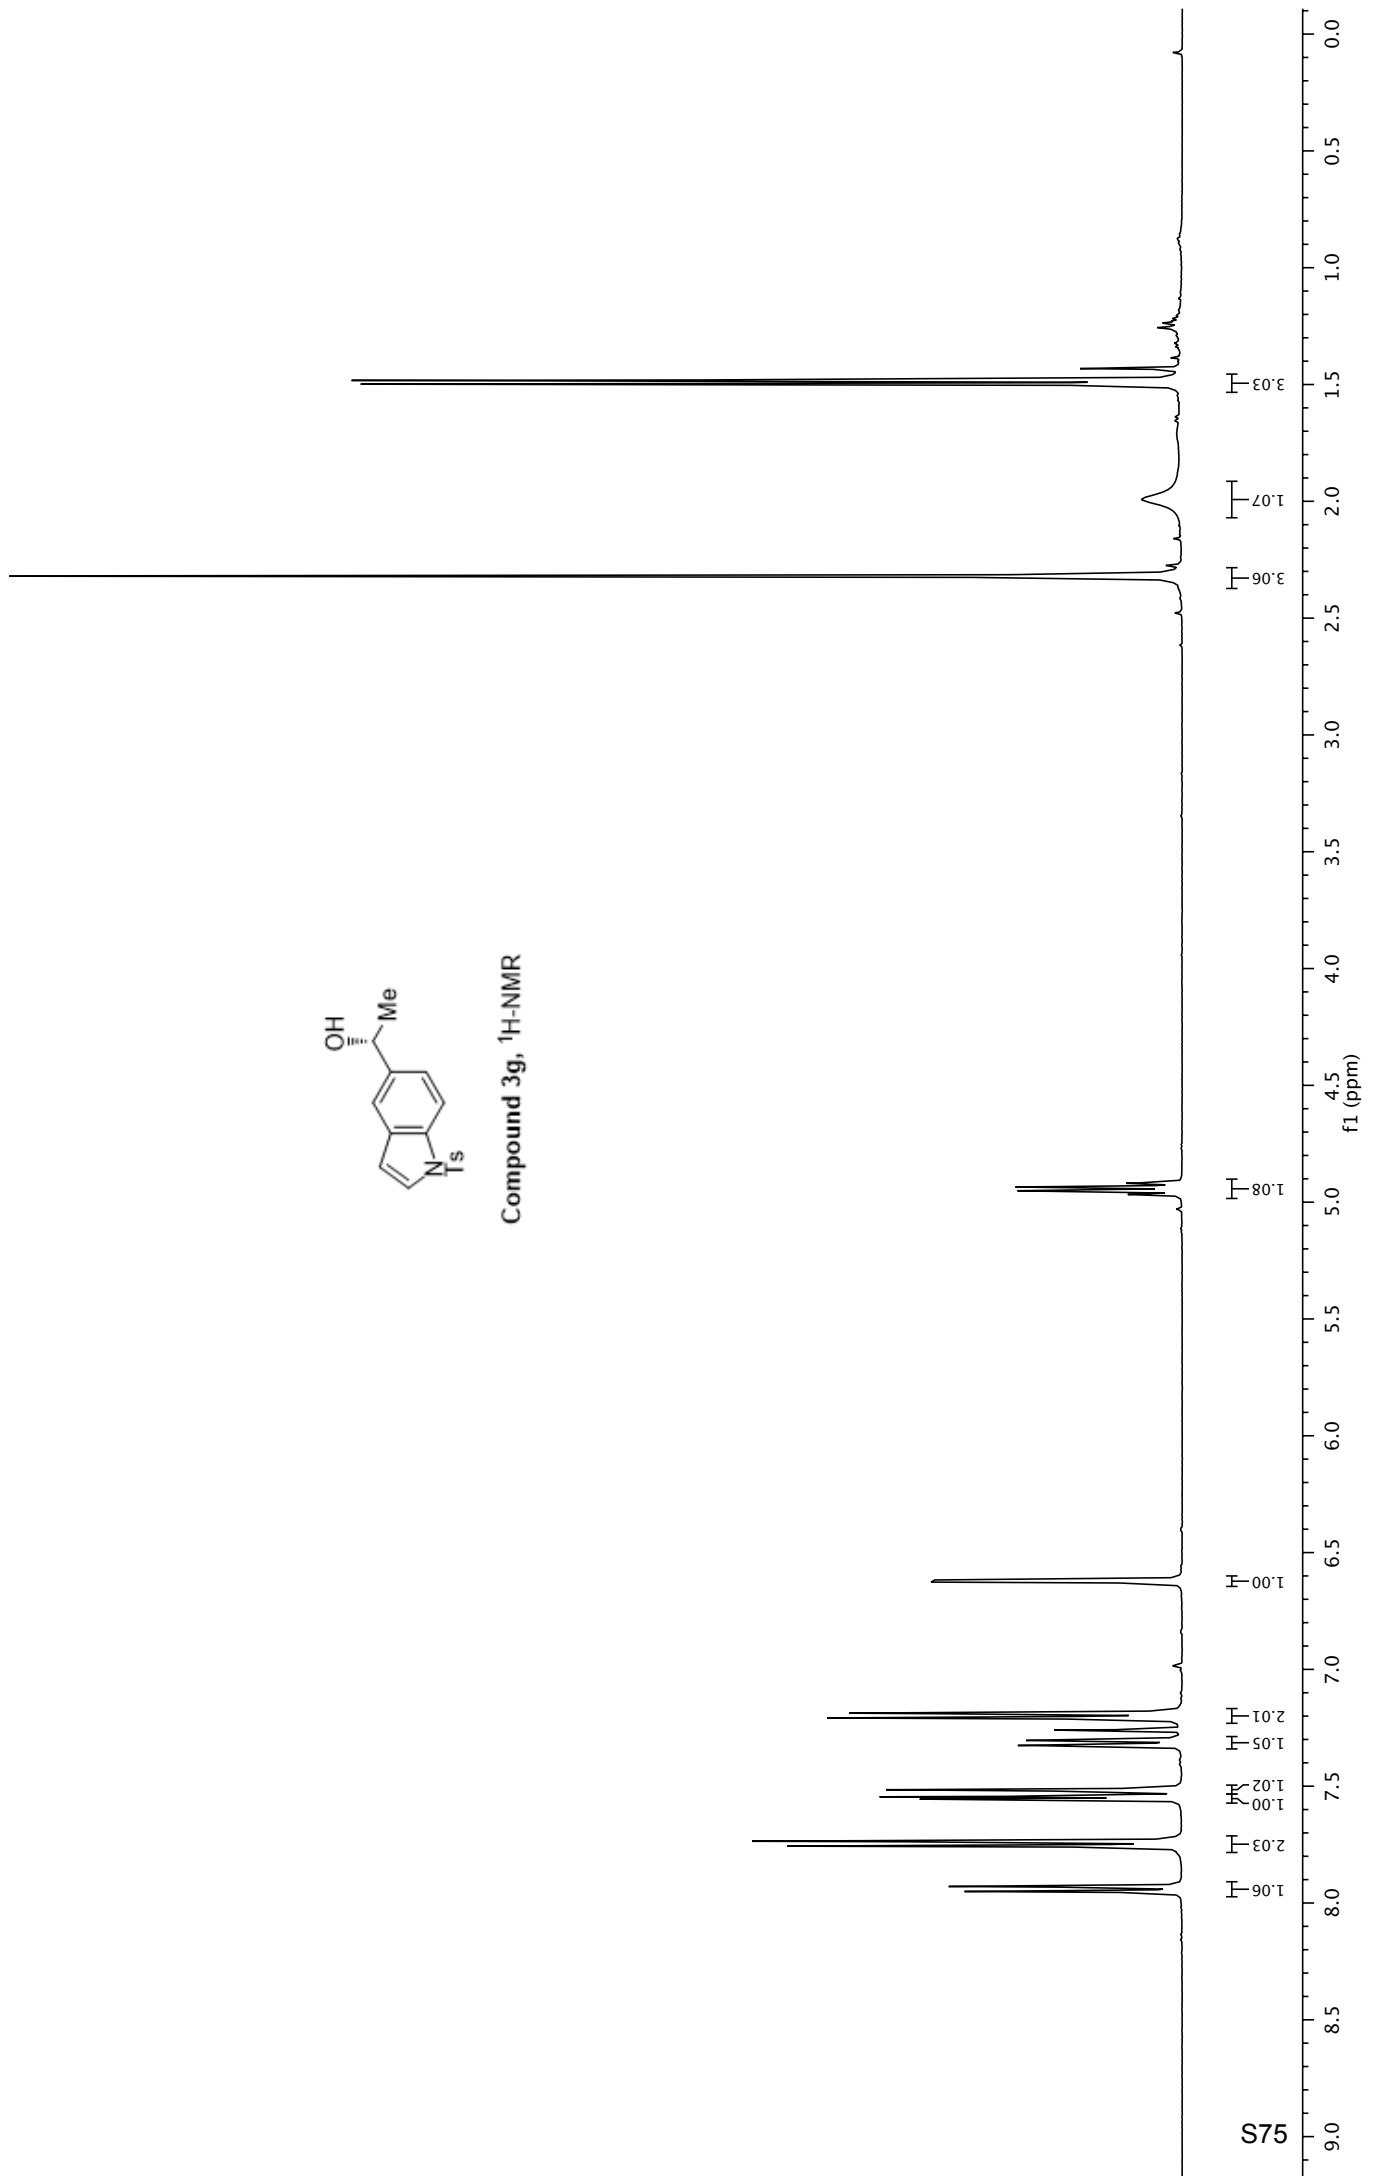



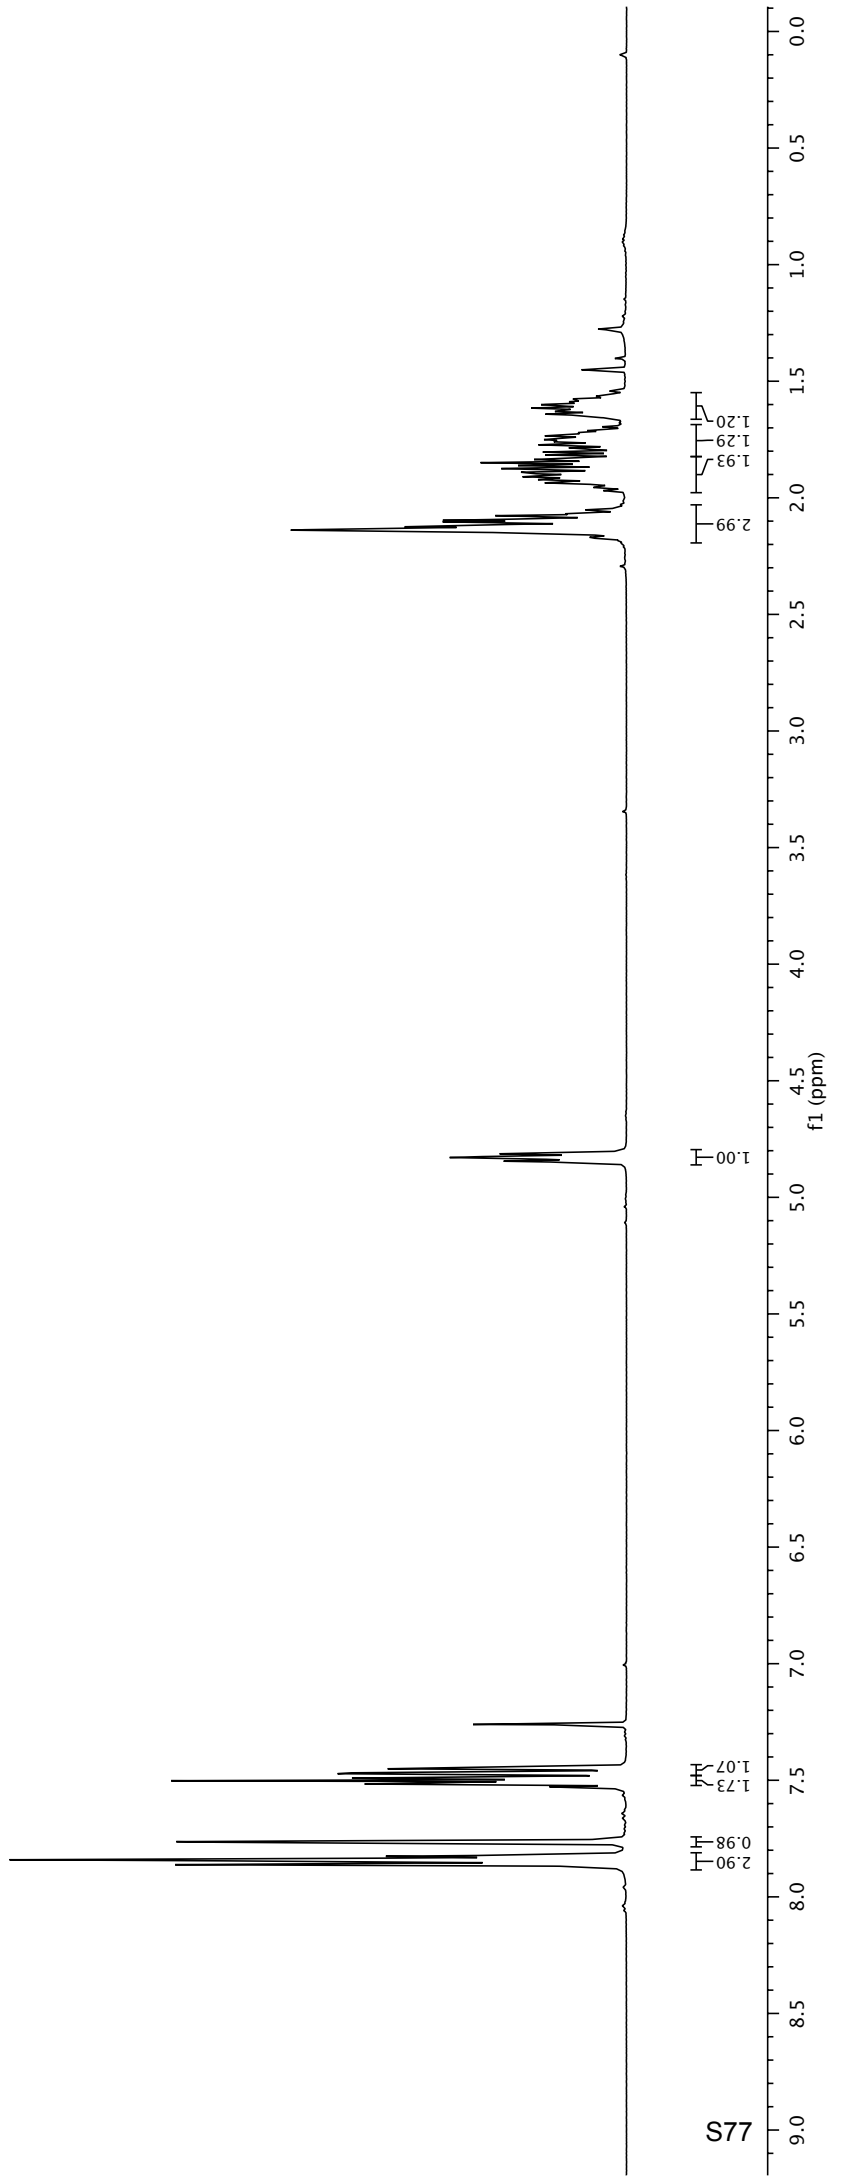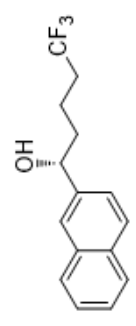

Compound 3h, <sup>1</sup>H-NMR

- 1.56
- 1.58
- 1.58
- 1.59
- 1.60
- 1.62
- 1.62
- 1.63
- 1.64
- 1.65
- 1.70
- 1.71
- 1.72
- 1.73
- 1.74
- 1.75
- 1.76
- 1.77
- 1.79
- 1.80
- 1.82
- 1.83
- 1.84
- 1.85
- 1.86
- 1.87
- 1.89
- 1.90
- 1.90
- 1.91
- 1.92
- 1.92
- 1.94
- 1.96
- 1.97
- 2.07
- 2.08
- 2.10
- 2.10
- 2.12
- 2.12
- 2.14

- 4.81
- 4.83
- 4.85

- 7.45
- 7.45
- 7.47
- 7.47
- 7.49
- 7.49
- 7.50
- 7.51
- 7.52
- 7.76
- 7.83
- 7.84
- 7.86

18.69  
18.66  
18.63  
18.60

37.81  
34.16  
33.88  
33.59  
33.31

74.40

133.37  
133.20  
131.36  
128.68  
128.61  
128.08  
127.88  
126.48  
126.18  
125.87  
124.73  
123.93  
123.12

141.67

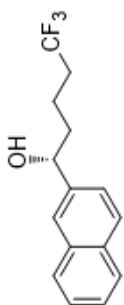

Compound 3h, <sup>13</sup>C-NMR

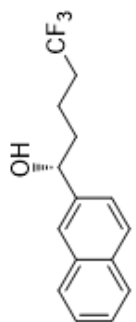

Compound 3h, <sup>19</sup>F-NMR

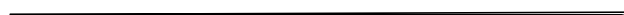

f1 (ppm)

-190 -180 -170 -160 -150 -140 -130 -120 -110 -100 -90 -80 -70 -60 -50 -40 -30 -20 -10

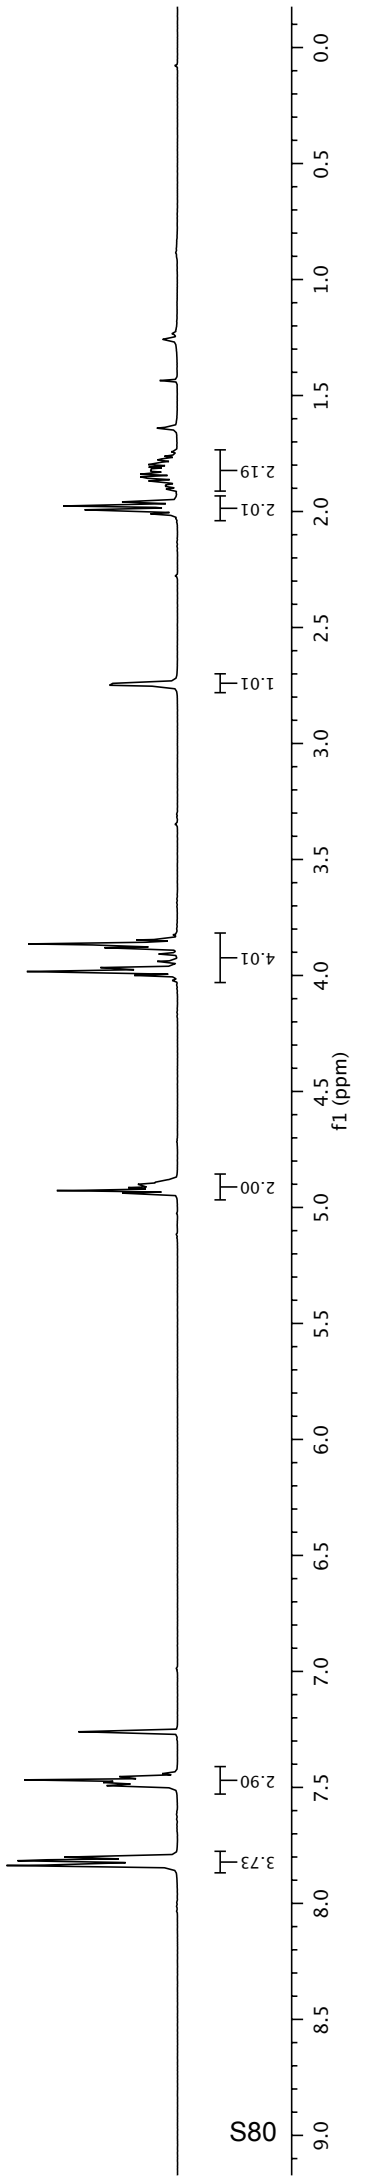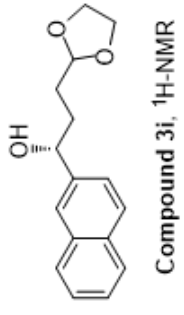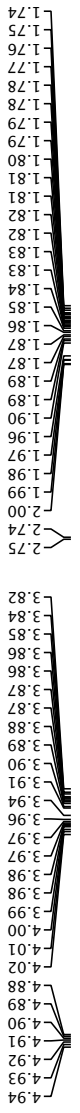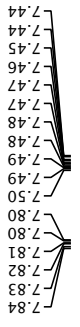



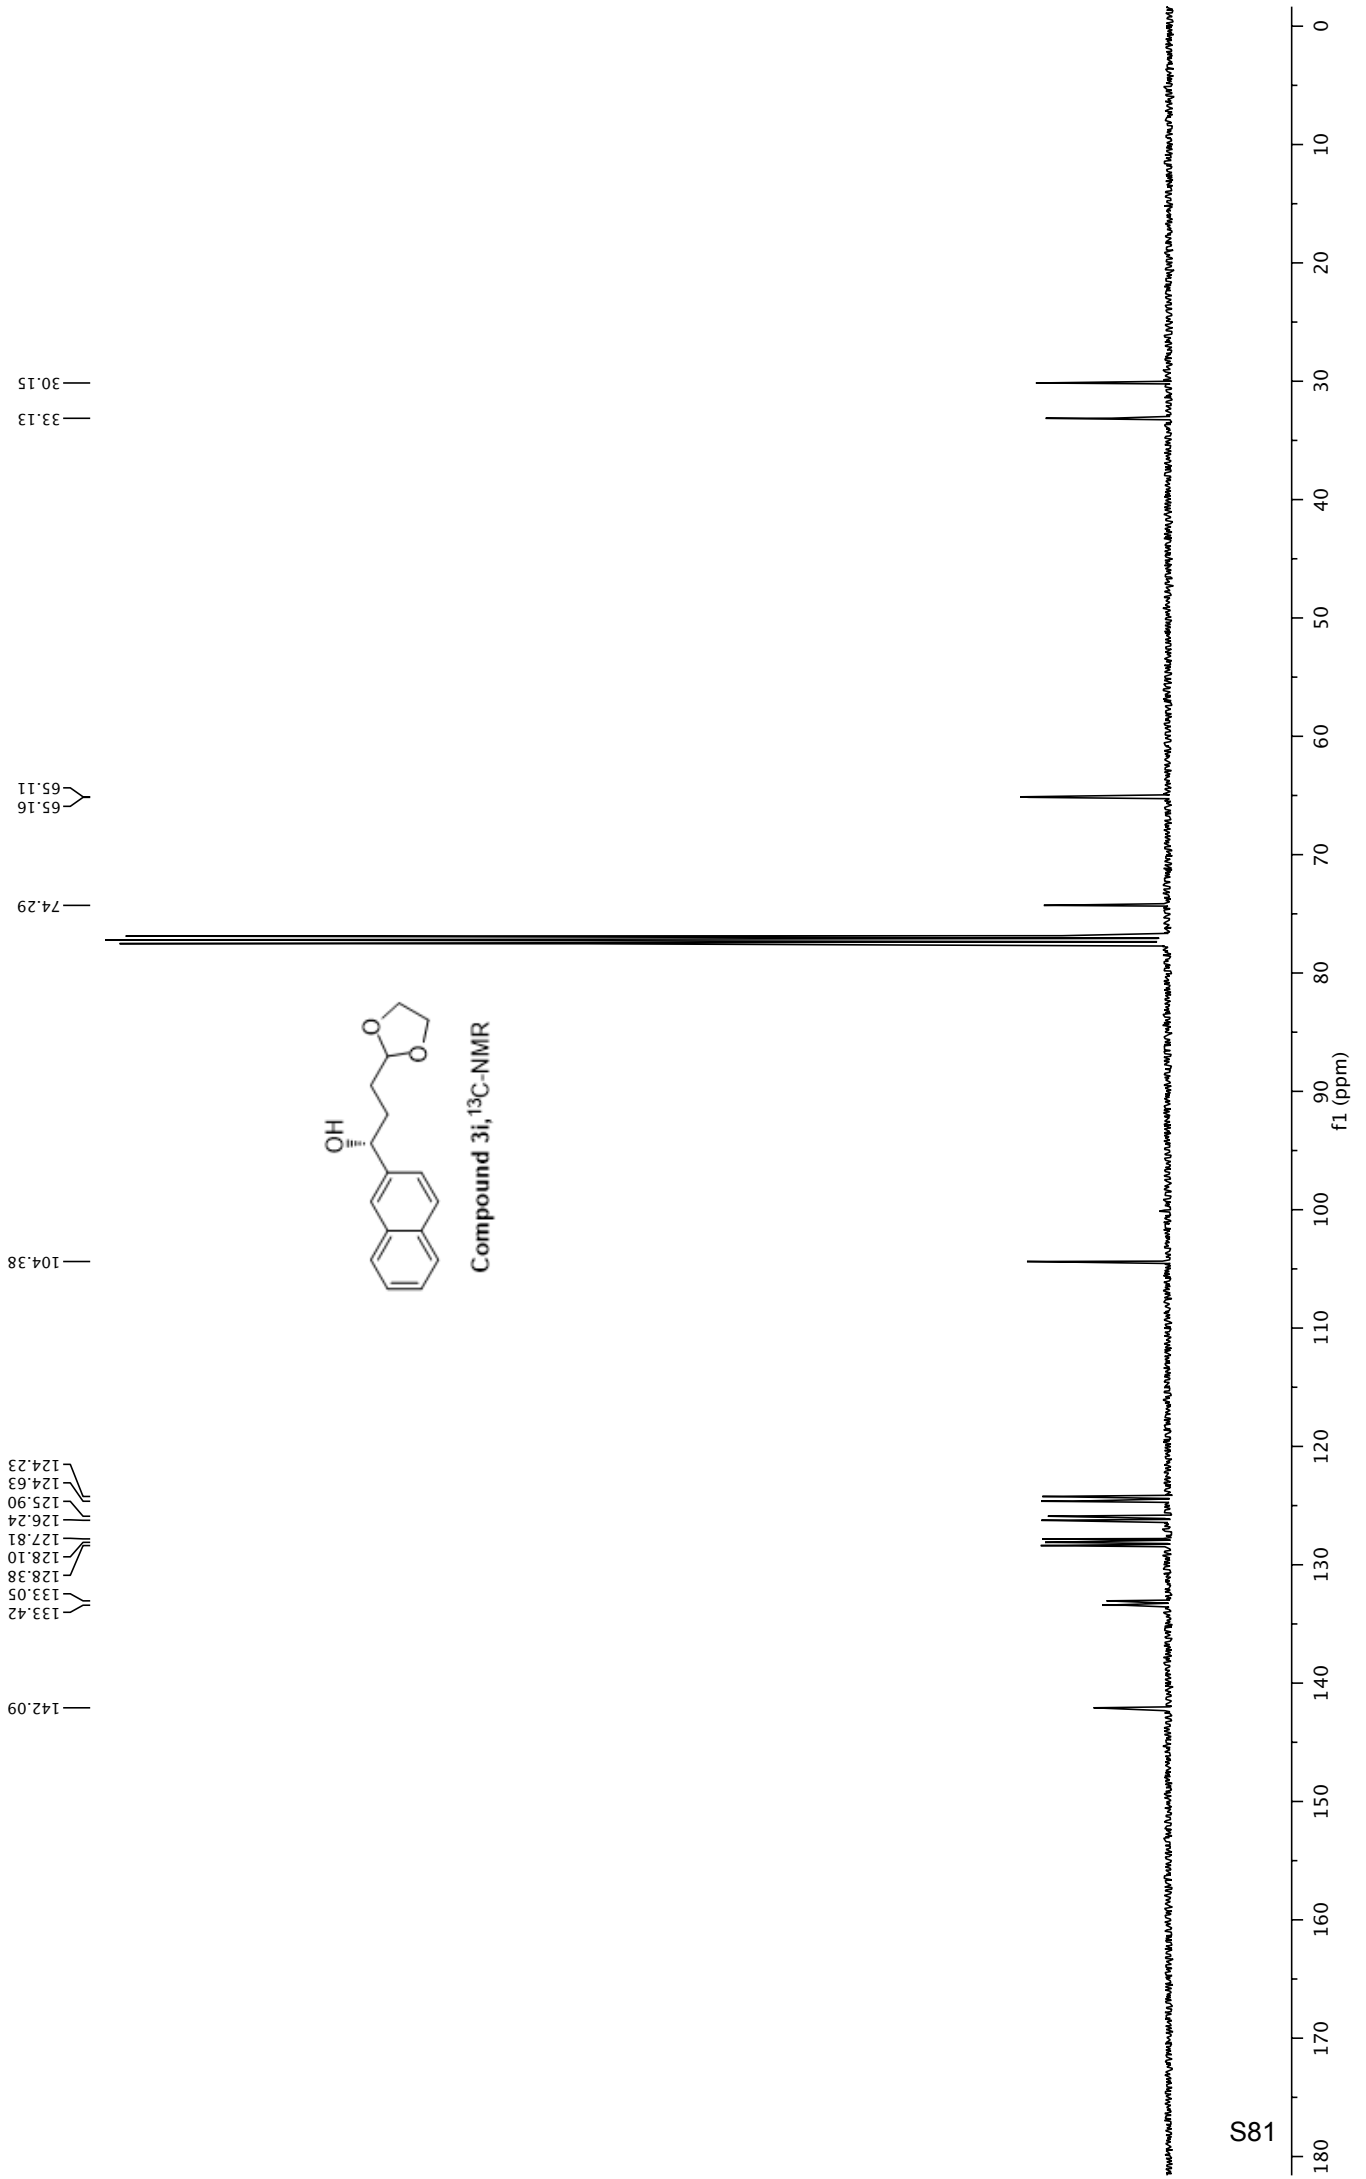

2.01  
2.02  
2.09  
2.10  
2.10  
2.11  
2.12  
2.12  
2.13  
2.13  
2.14  
2.14  
2.15  
2.16  
2.16  
2.18  
2.19  
2.20  
2.21  
2.21  
2.22  
2.22  
2.23  
2.24  
2.24  
2.24  
2.25  
2.26  
2.26  
2.28  
2.67  
2.69  
2.69  
2.71  
2.71  
2.72  
2.73  
2.75  
2.75  
2.77  
2.78  
2.79  
2.79  
2.80  
2.81  
2.83

4.84  
4.85  
4.86  
4.87  
4.88  
4.89

7.19  
7.19  
7.21  
7.22  
7.22  
7.28  
7.29  
7.30  
7.30  
7.32  
7.46  
7.47  
7.48  
7.48  
7.49  
7.49  
7.50  
7.51  
7.52  
7.52  
7.79  
7.83  
7.84  
7.84  
7.84  
7.85  
7.86

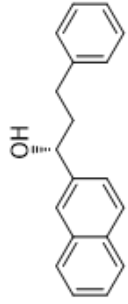

Compound 3j, <sup>1</sup>H-NMR

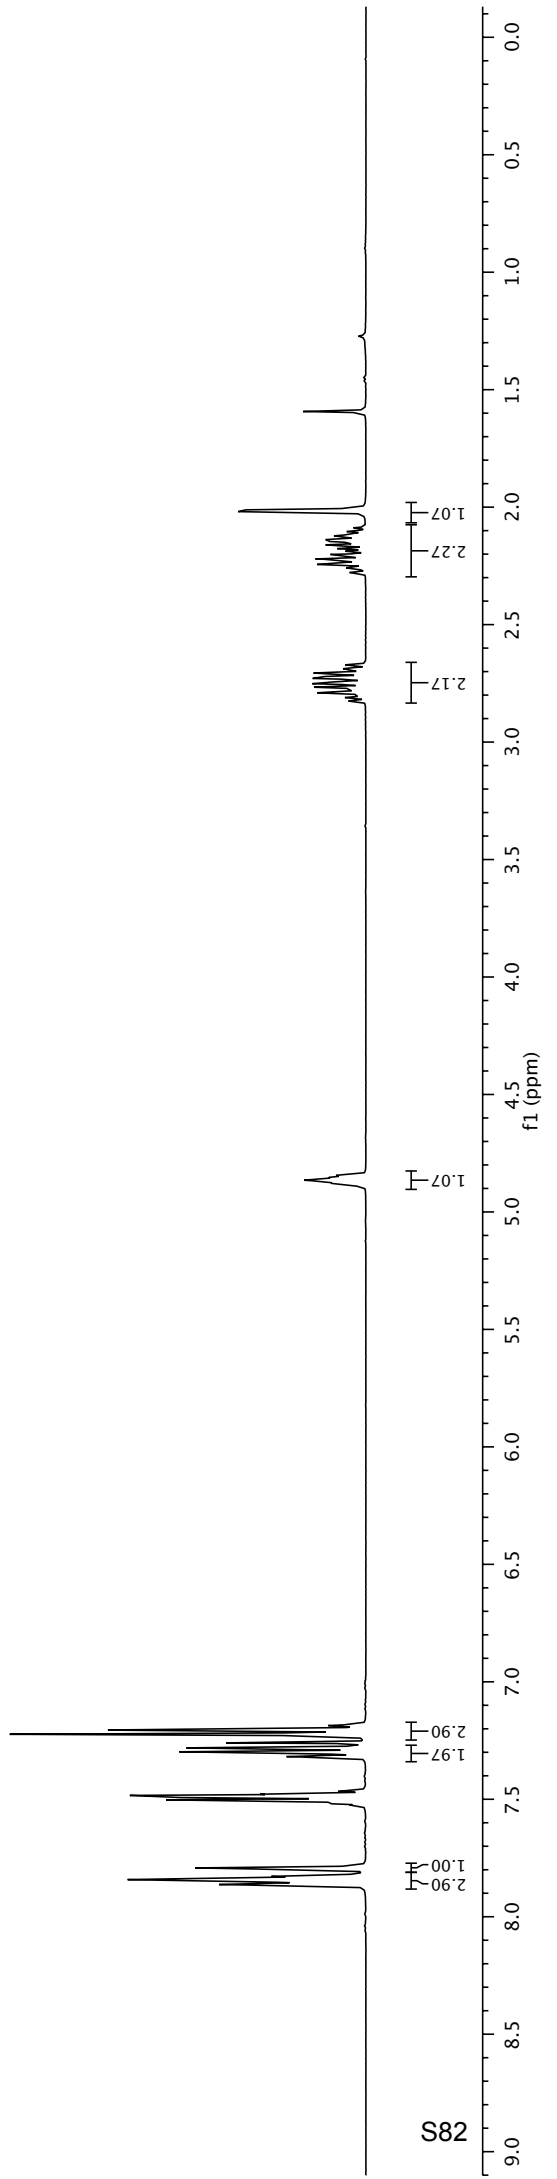

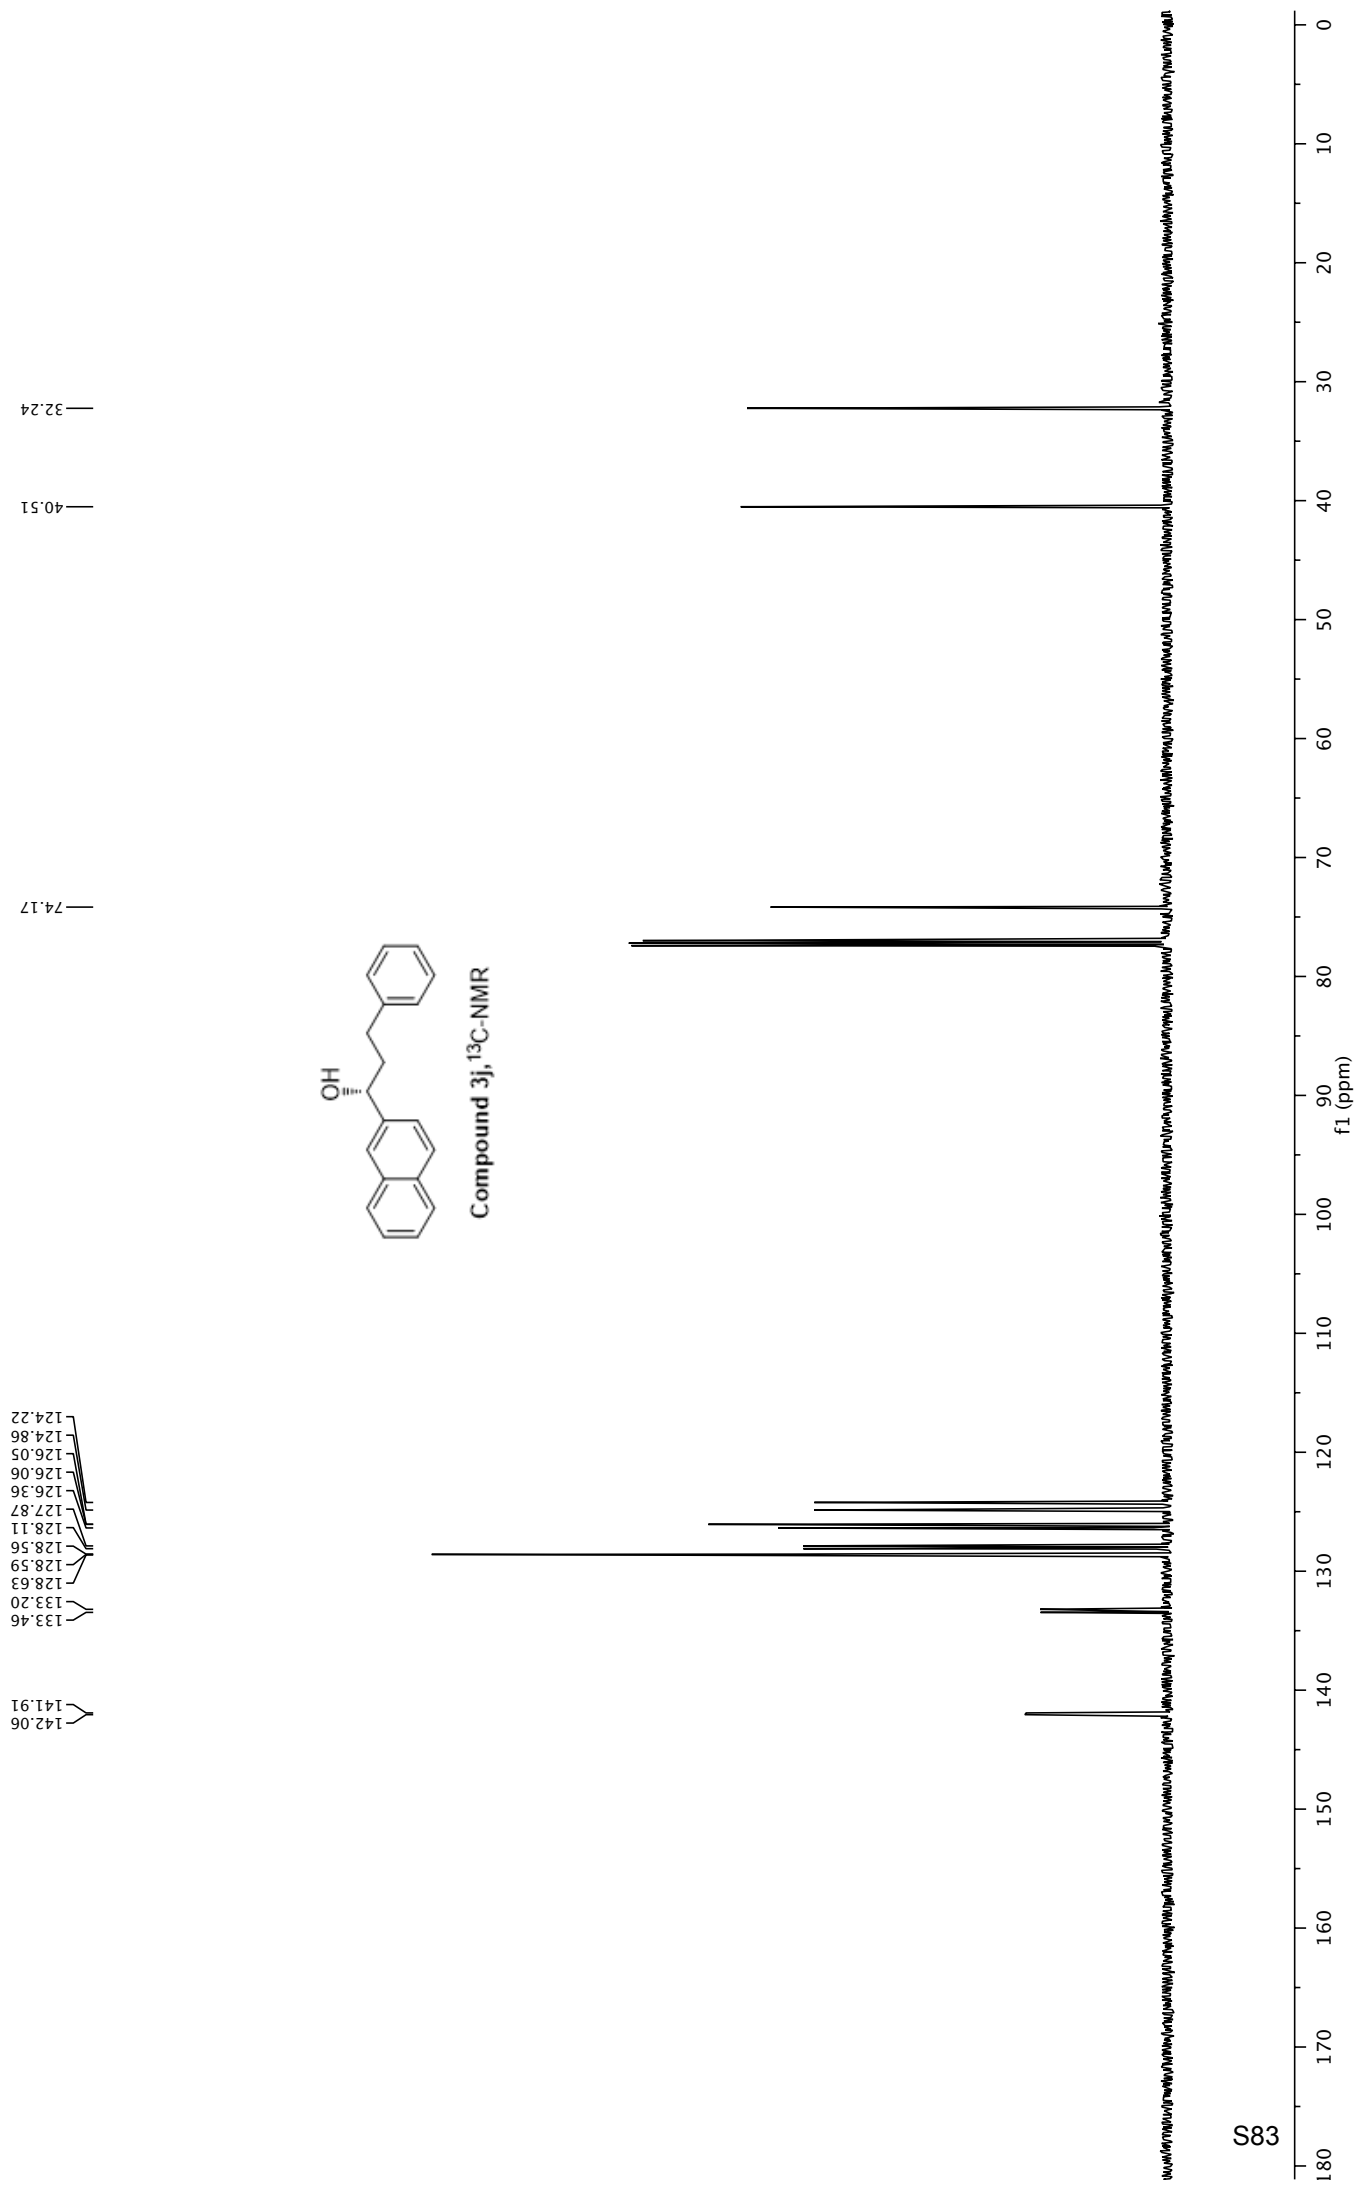

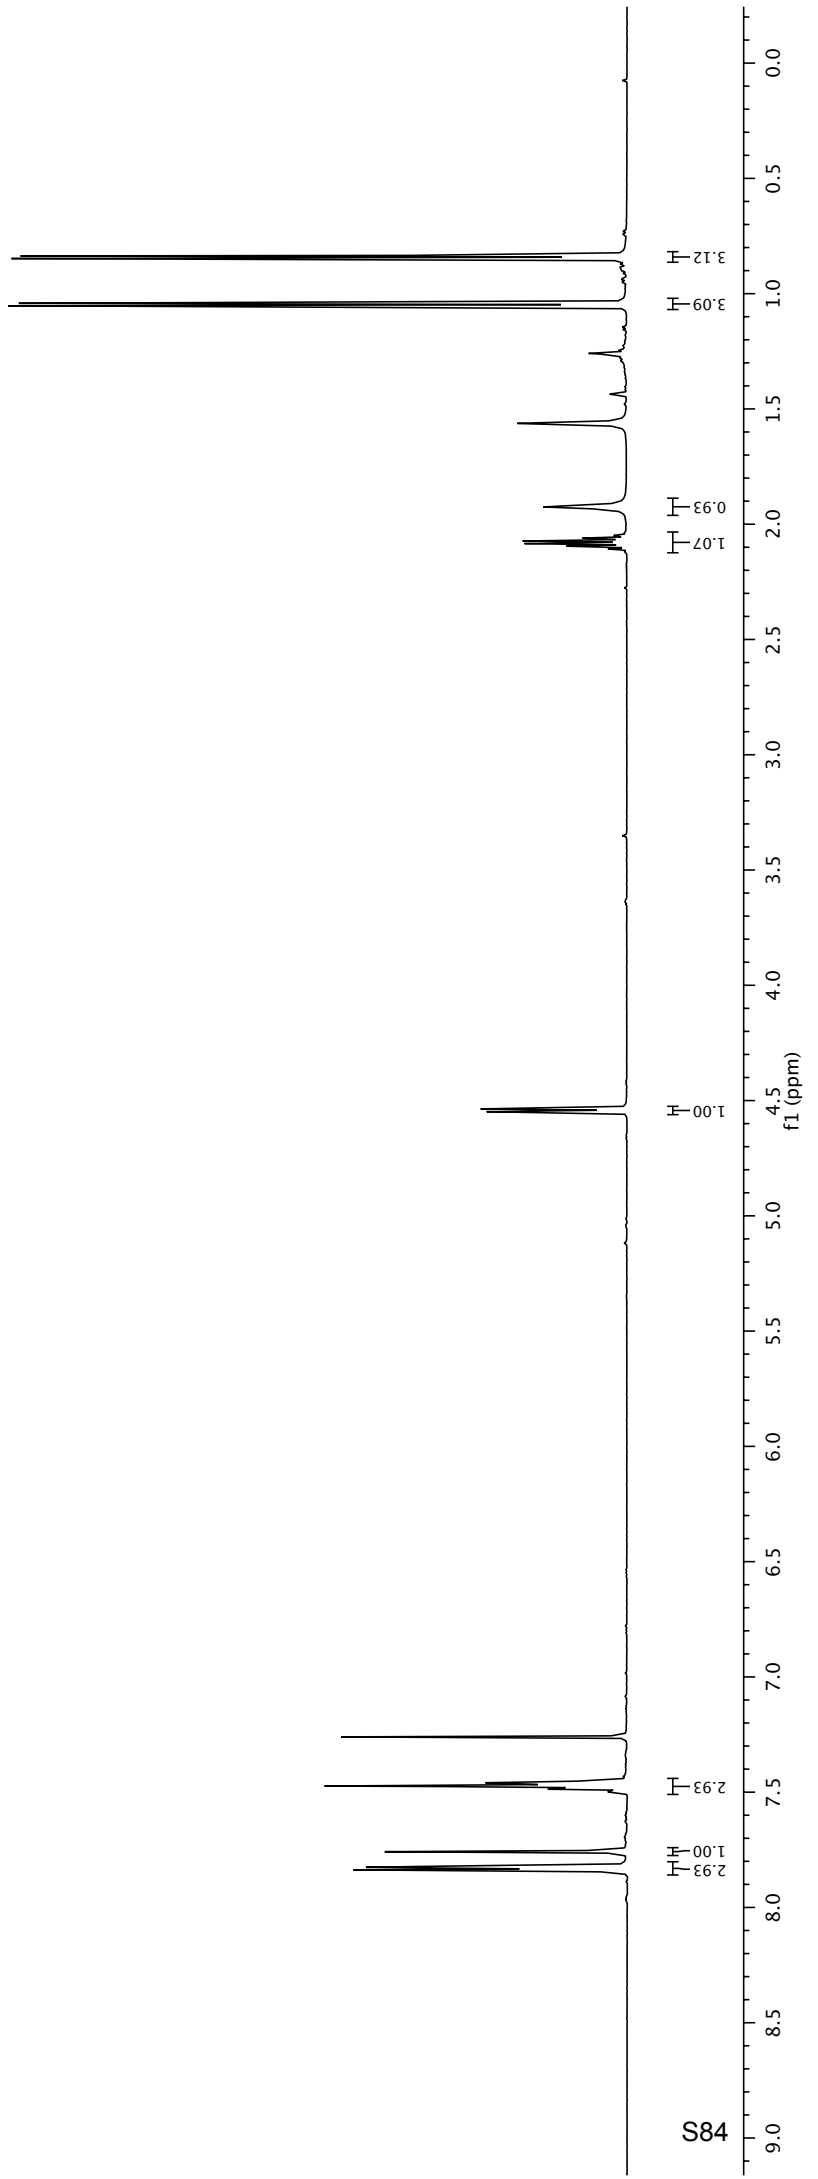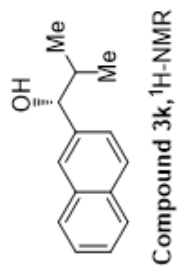

Compound 3k, 1H-NMR

1.05  
1.04  
0.85  
0.84

2.12  
2.11  
2.10  
2.08  
2.07  
2.06  
2.05  
2.04  
1.93

4.55  
4.54

7.84  
7.84  
7.83  
7.82  
7.76  
7.50  
7.49  
7.48  
7.47  
7.47  
7.46  
7.46  
7.46  
7.46

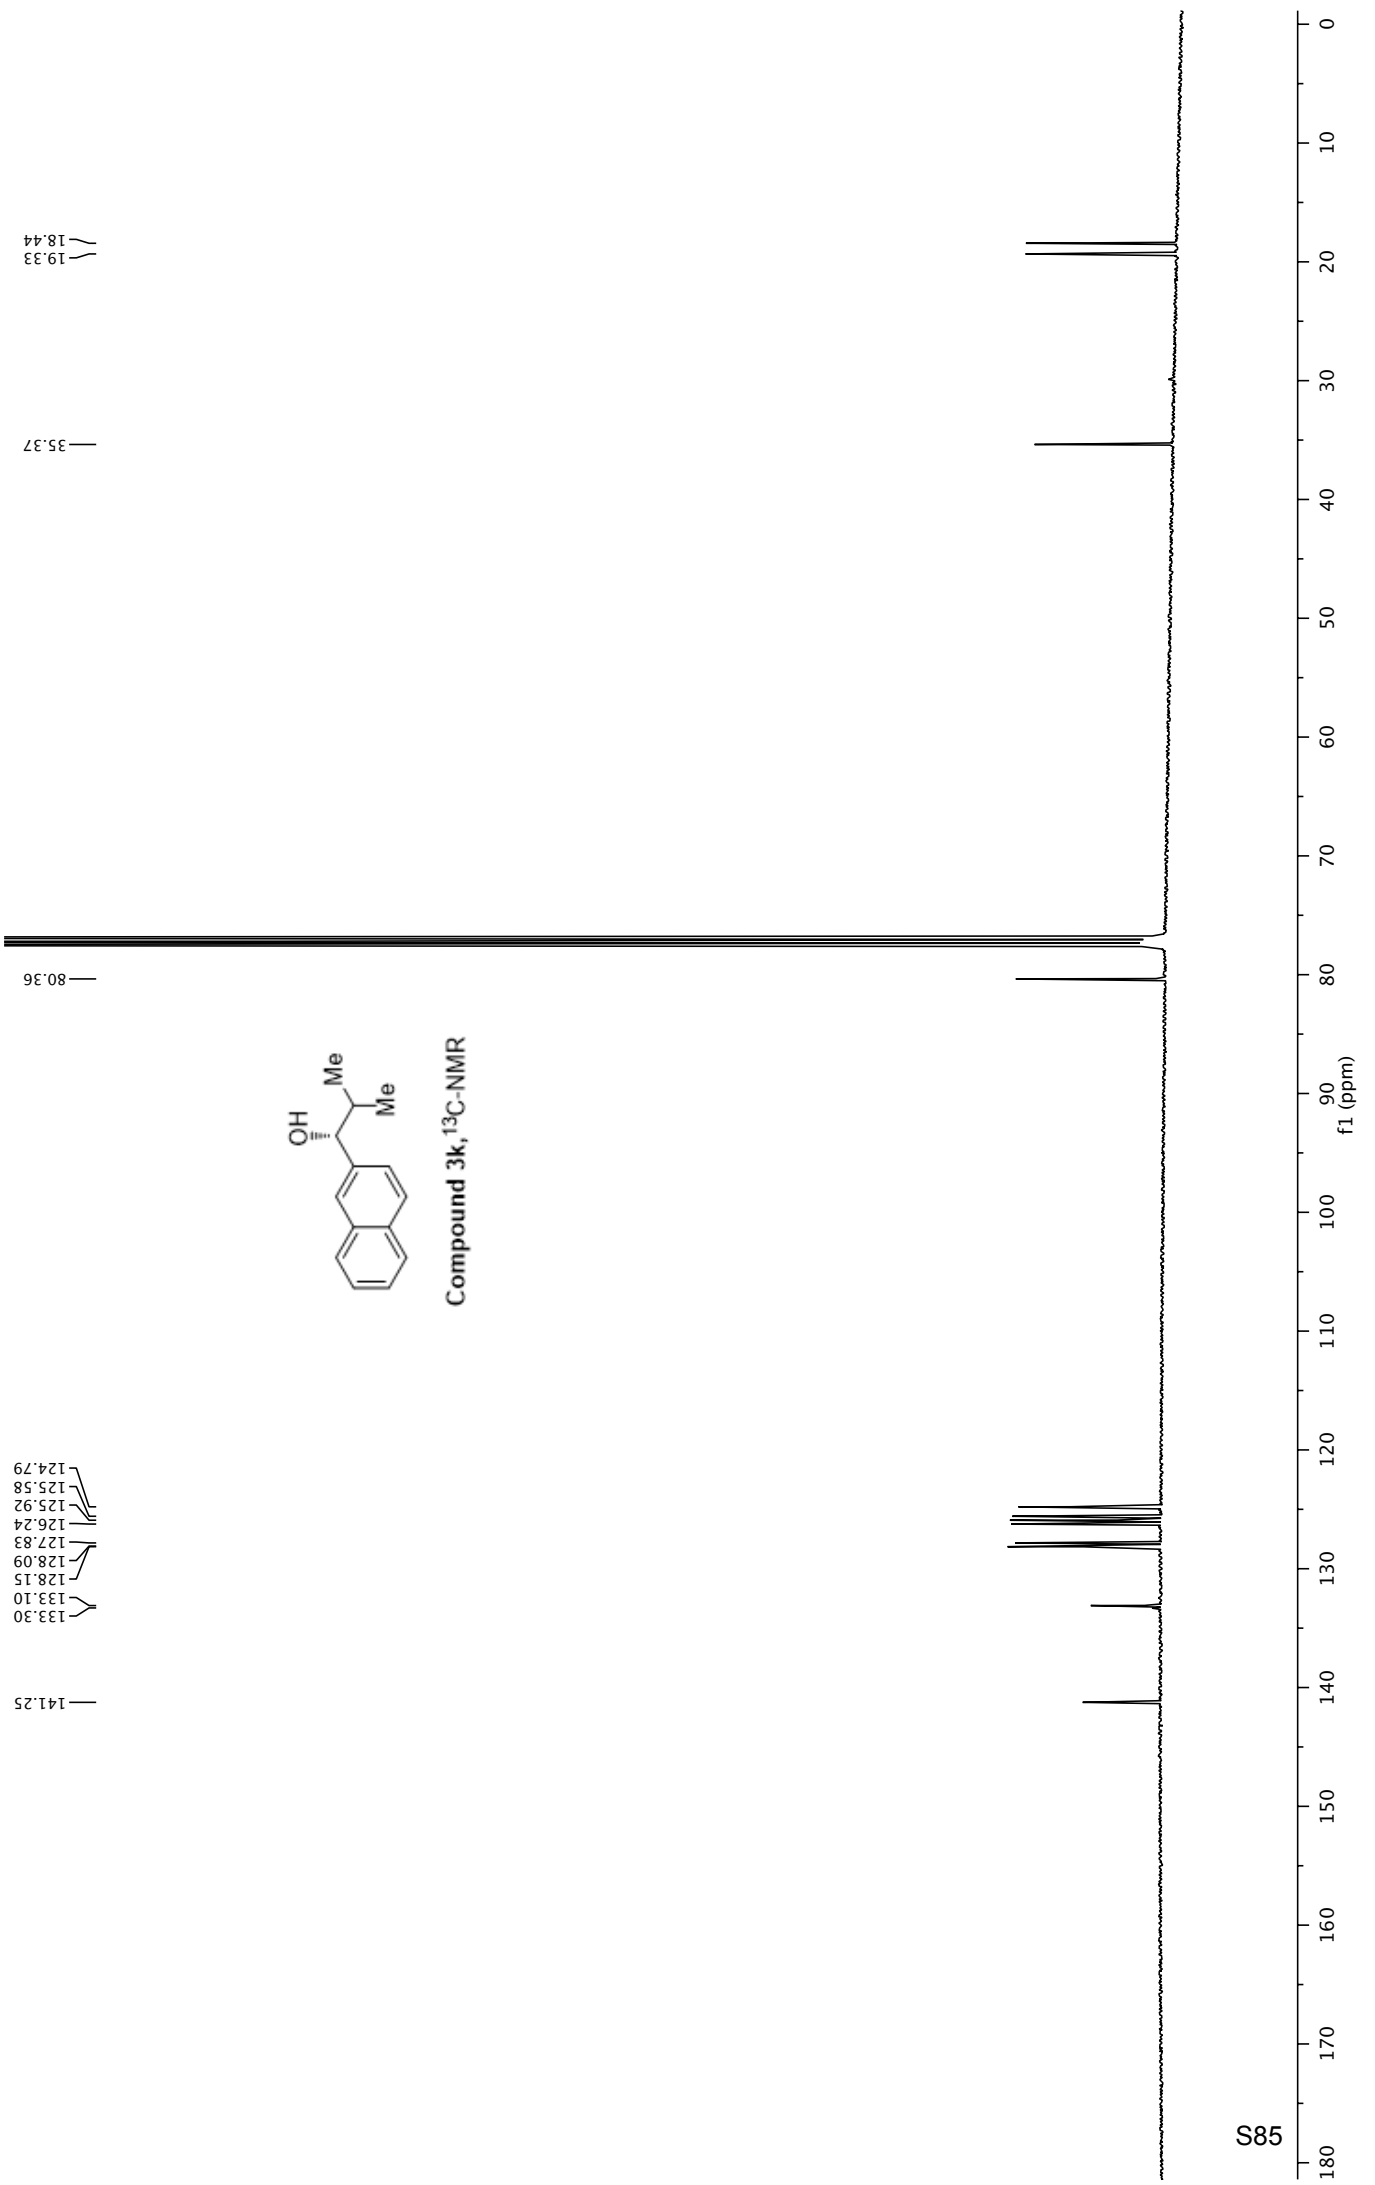

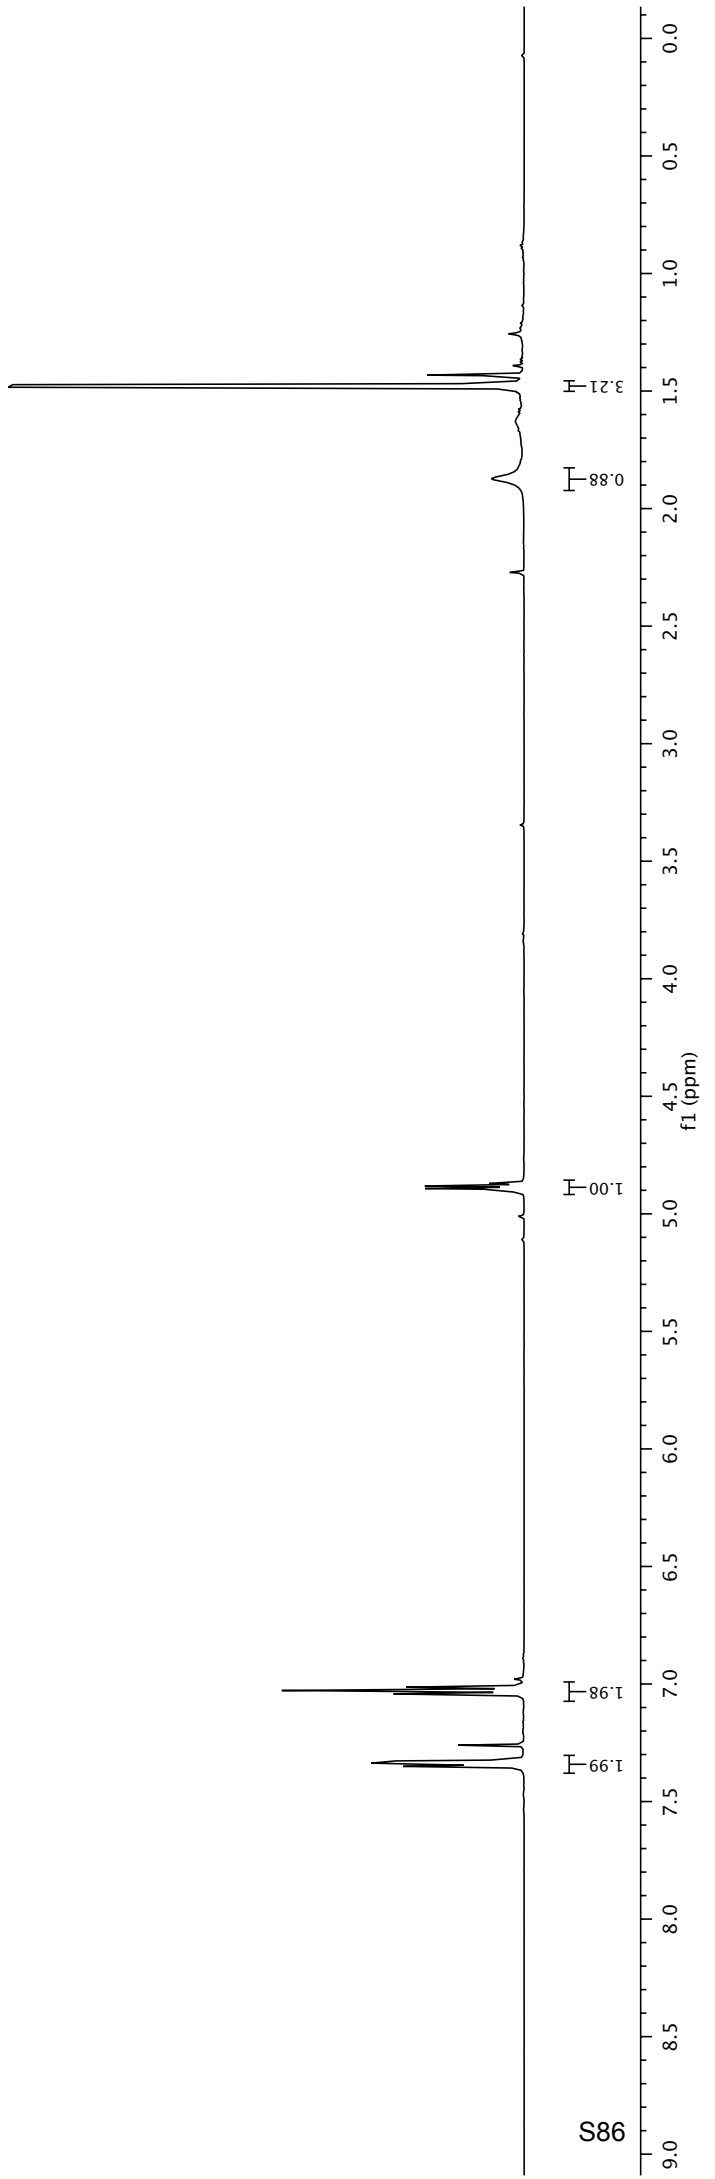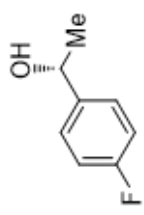

Compound 3n, <sup>1</sup>H-NMR

1.48  
1.47

1.87

4.87  
4.88  
4.89  
4.90

7.01  
7.03  
7.04  
7.33  
7.34  
7.34  
7.35

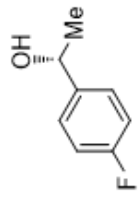Compound 3n,  $^{13}\text{C}$ -NMR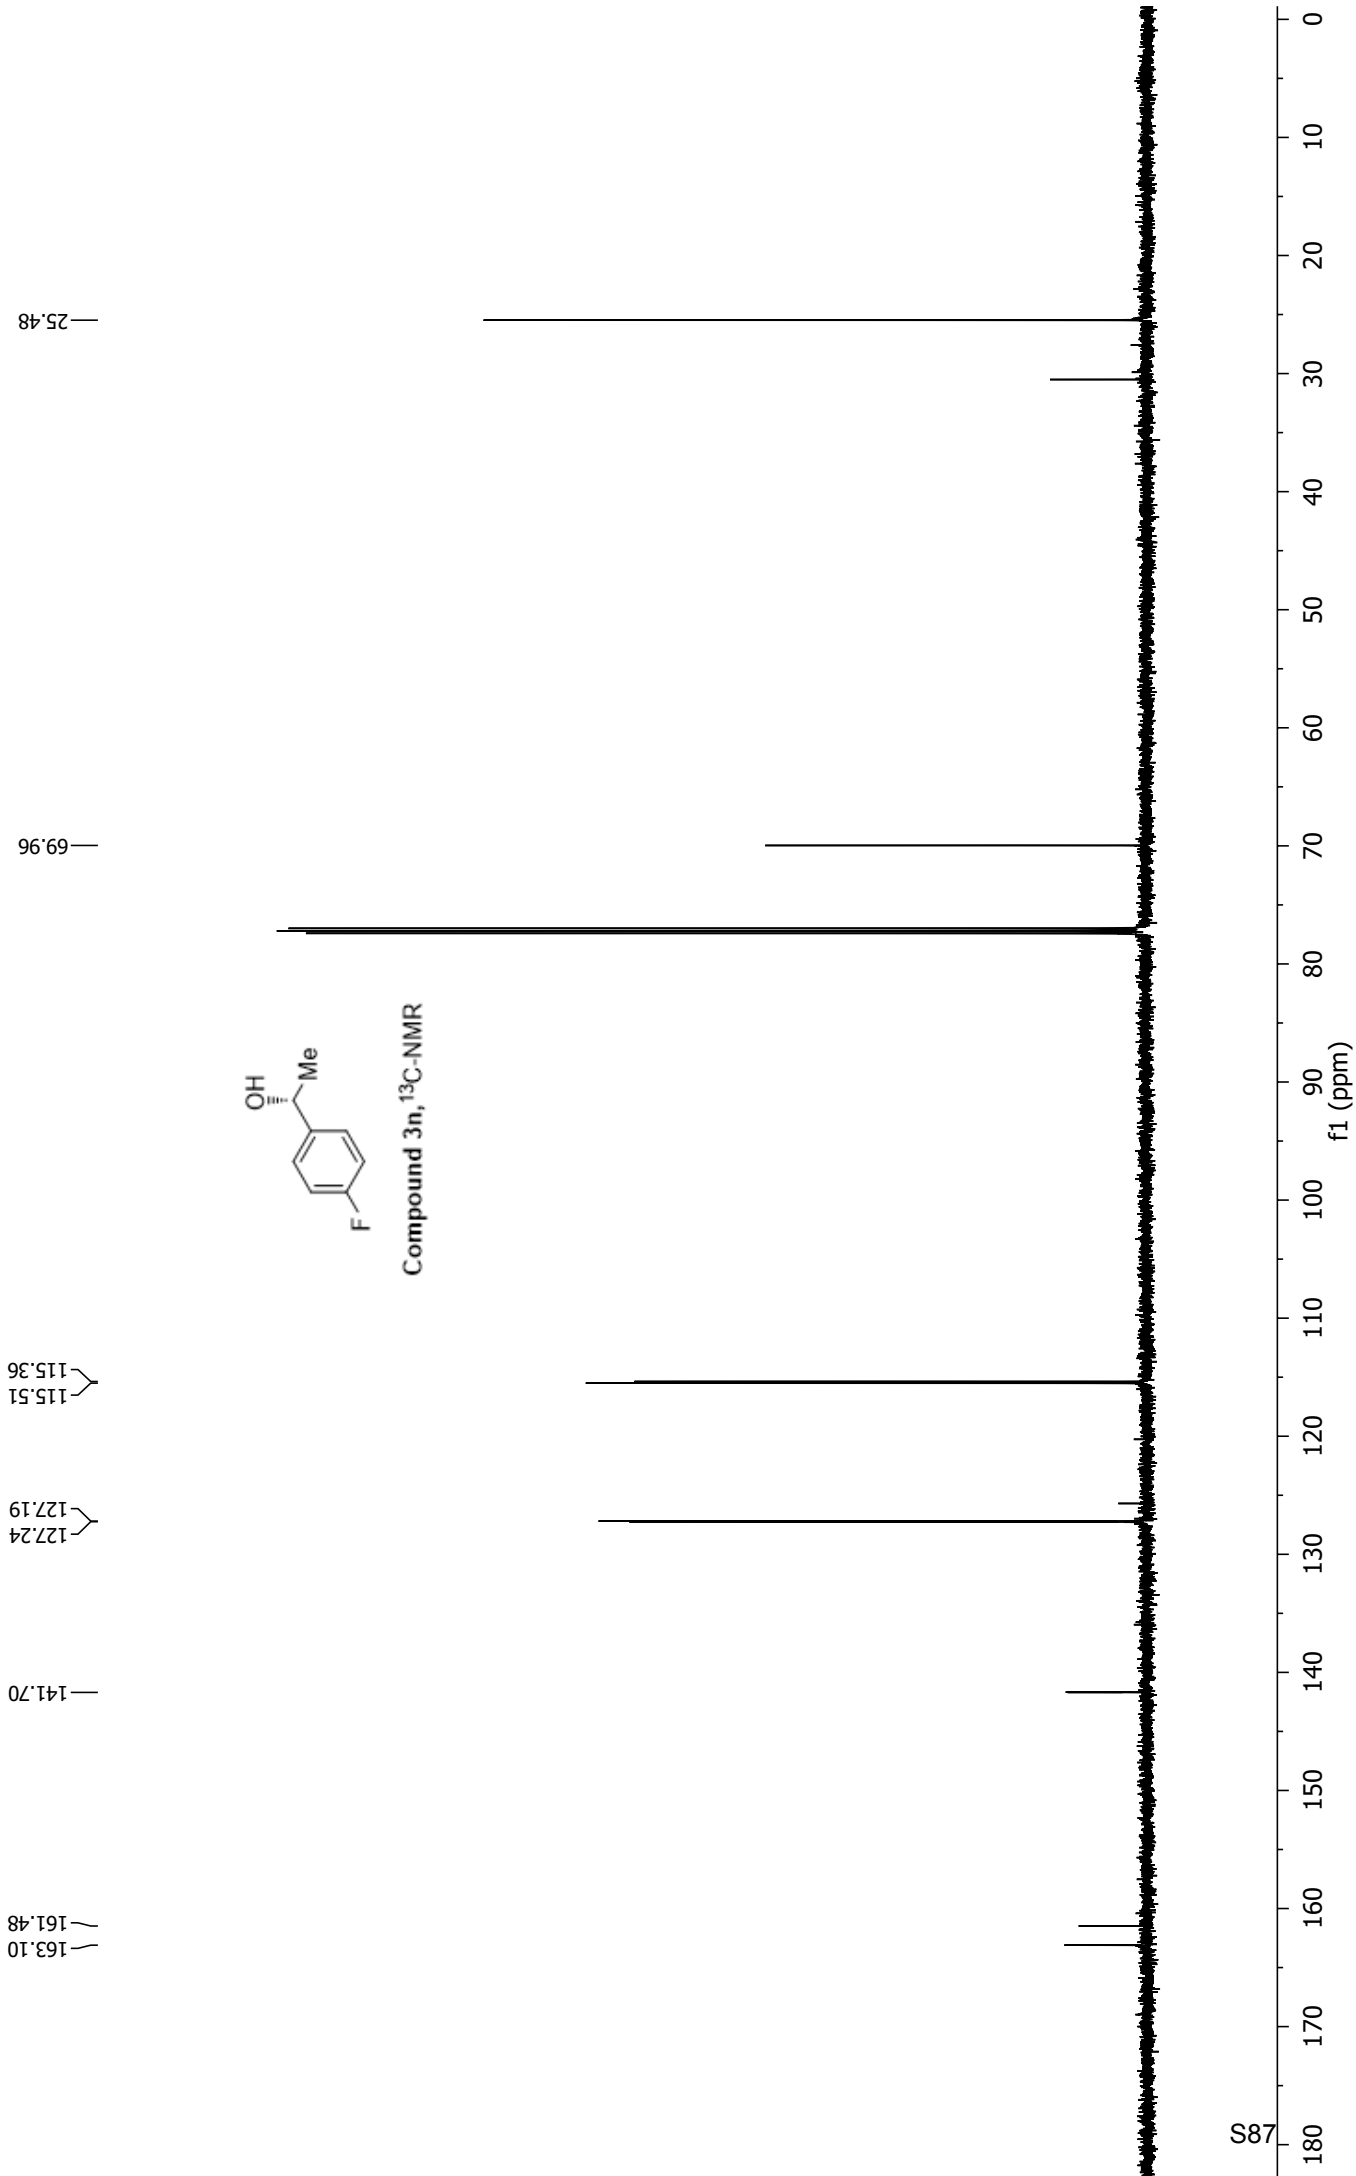

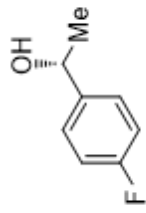

Compound 3n, <sup>19</sup>F-NMR

-115.36

f1 (ppm)



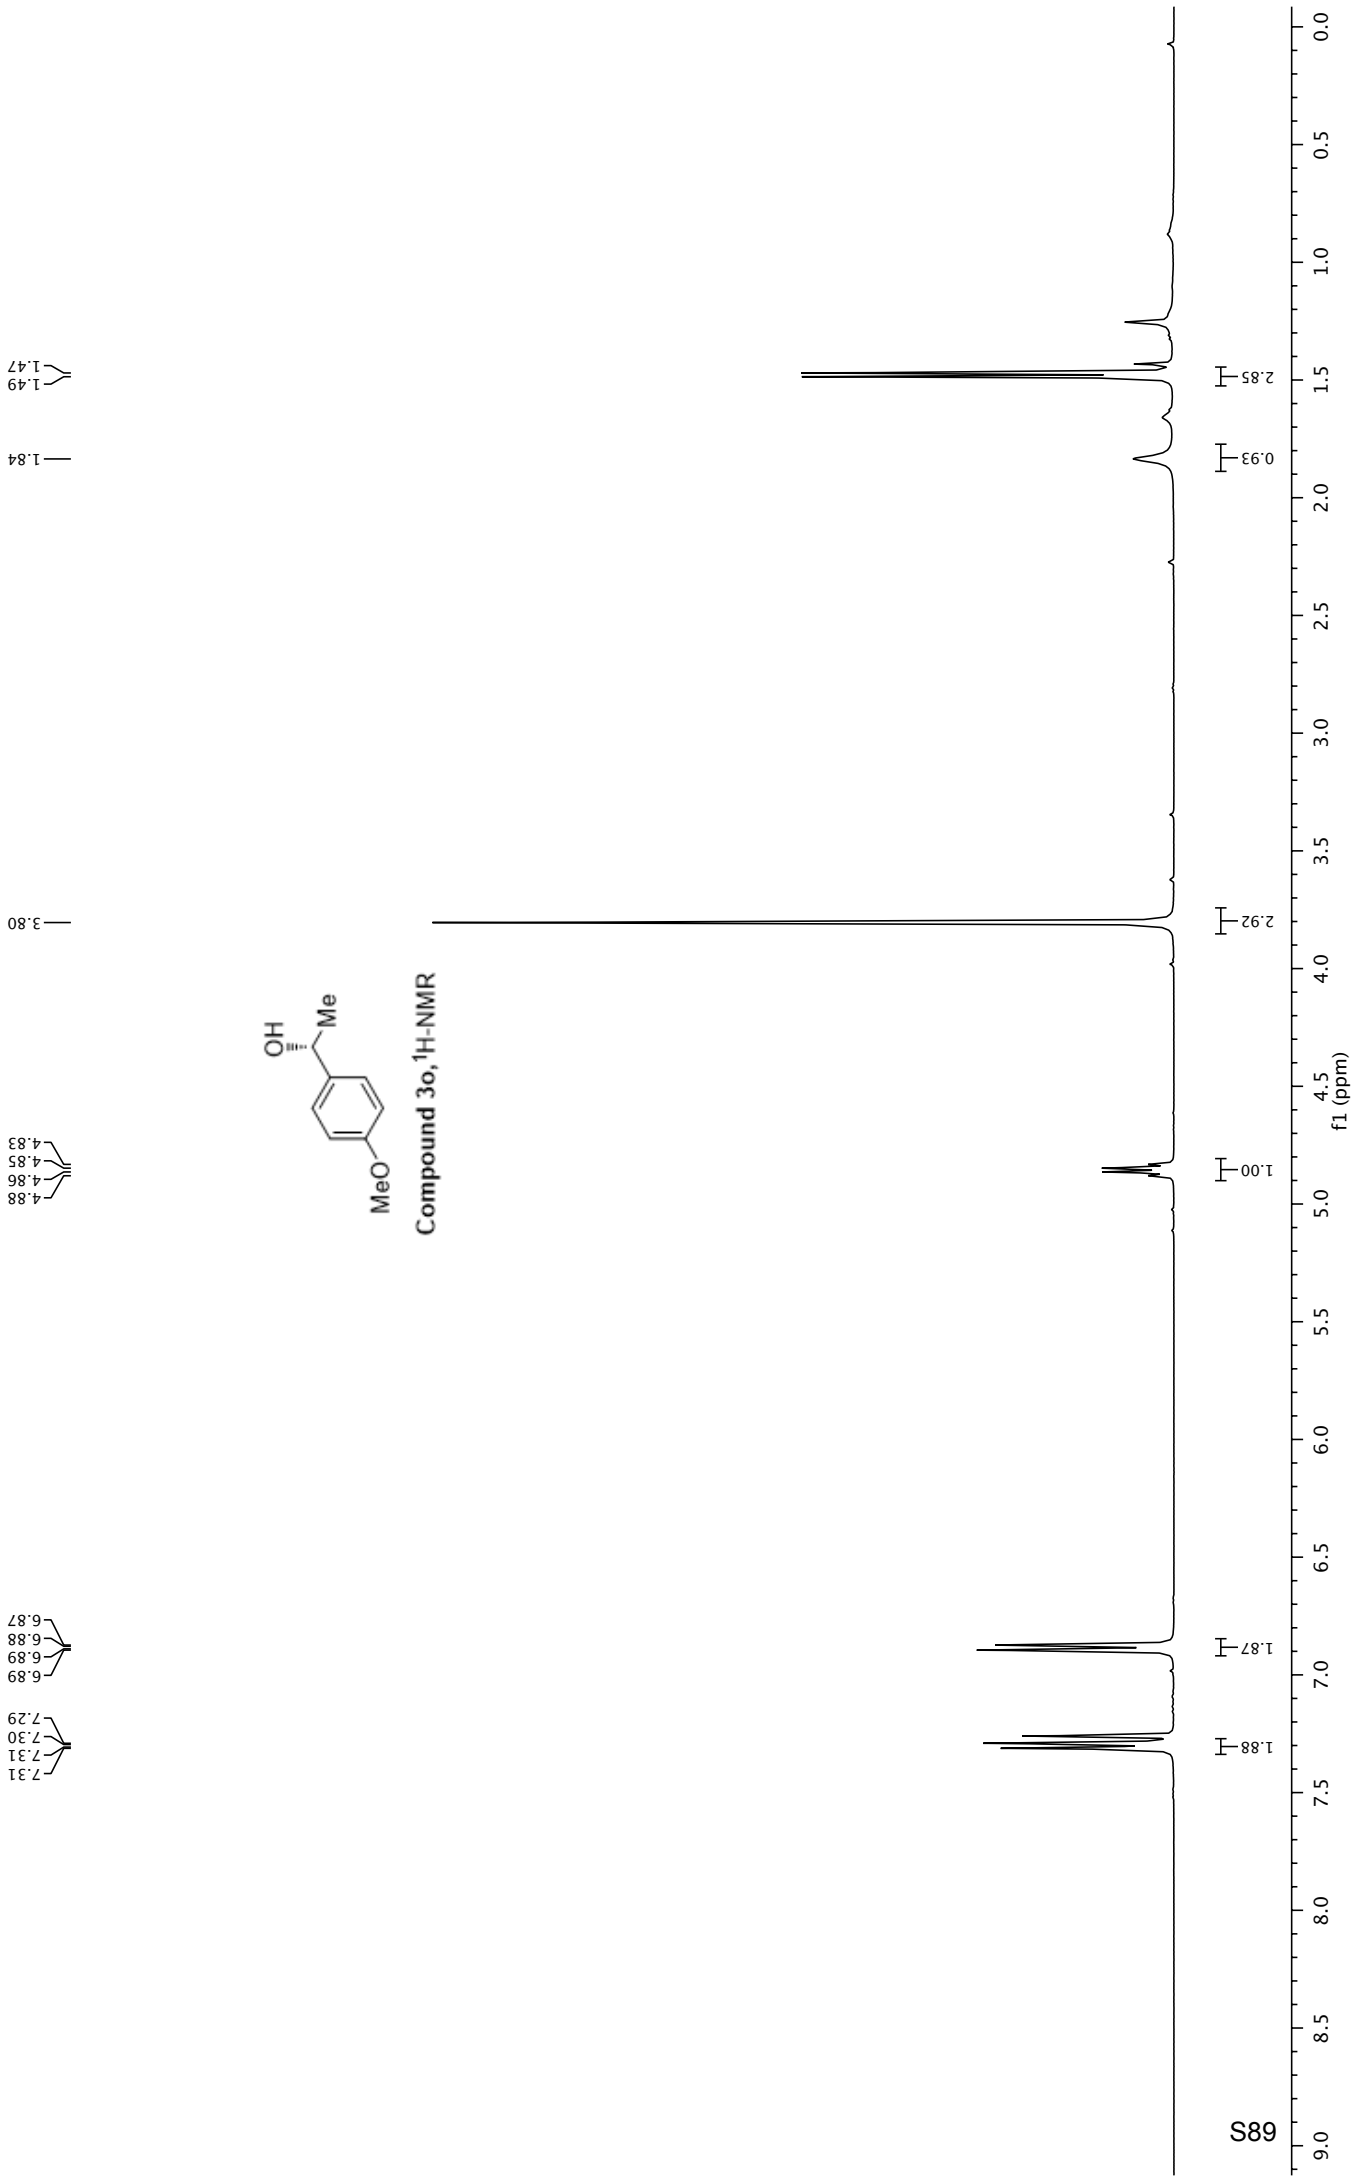

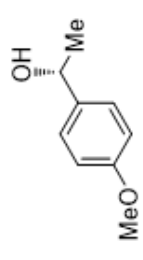

Compound 3o, <sup>13</sup>C-NMR

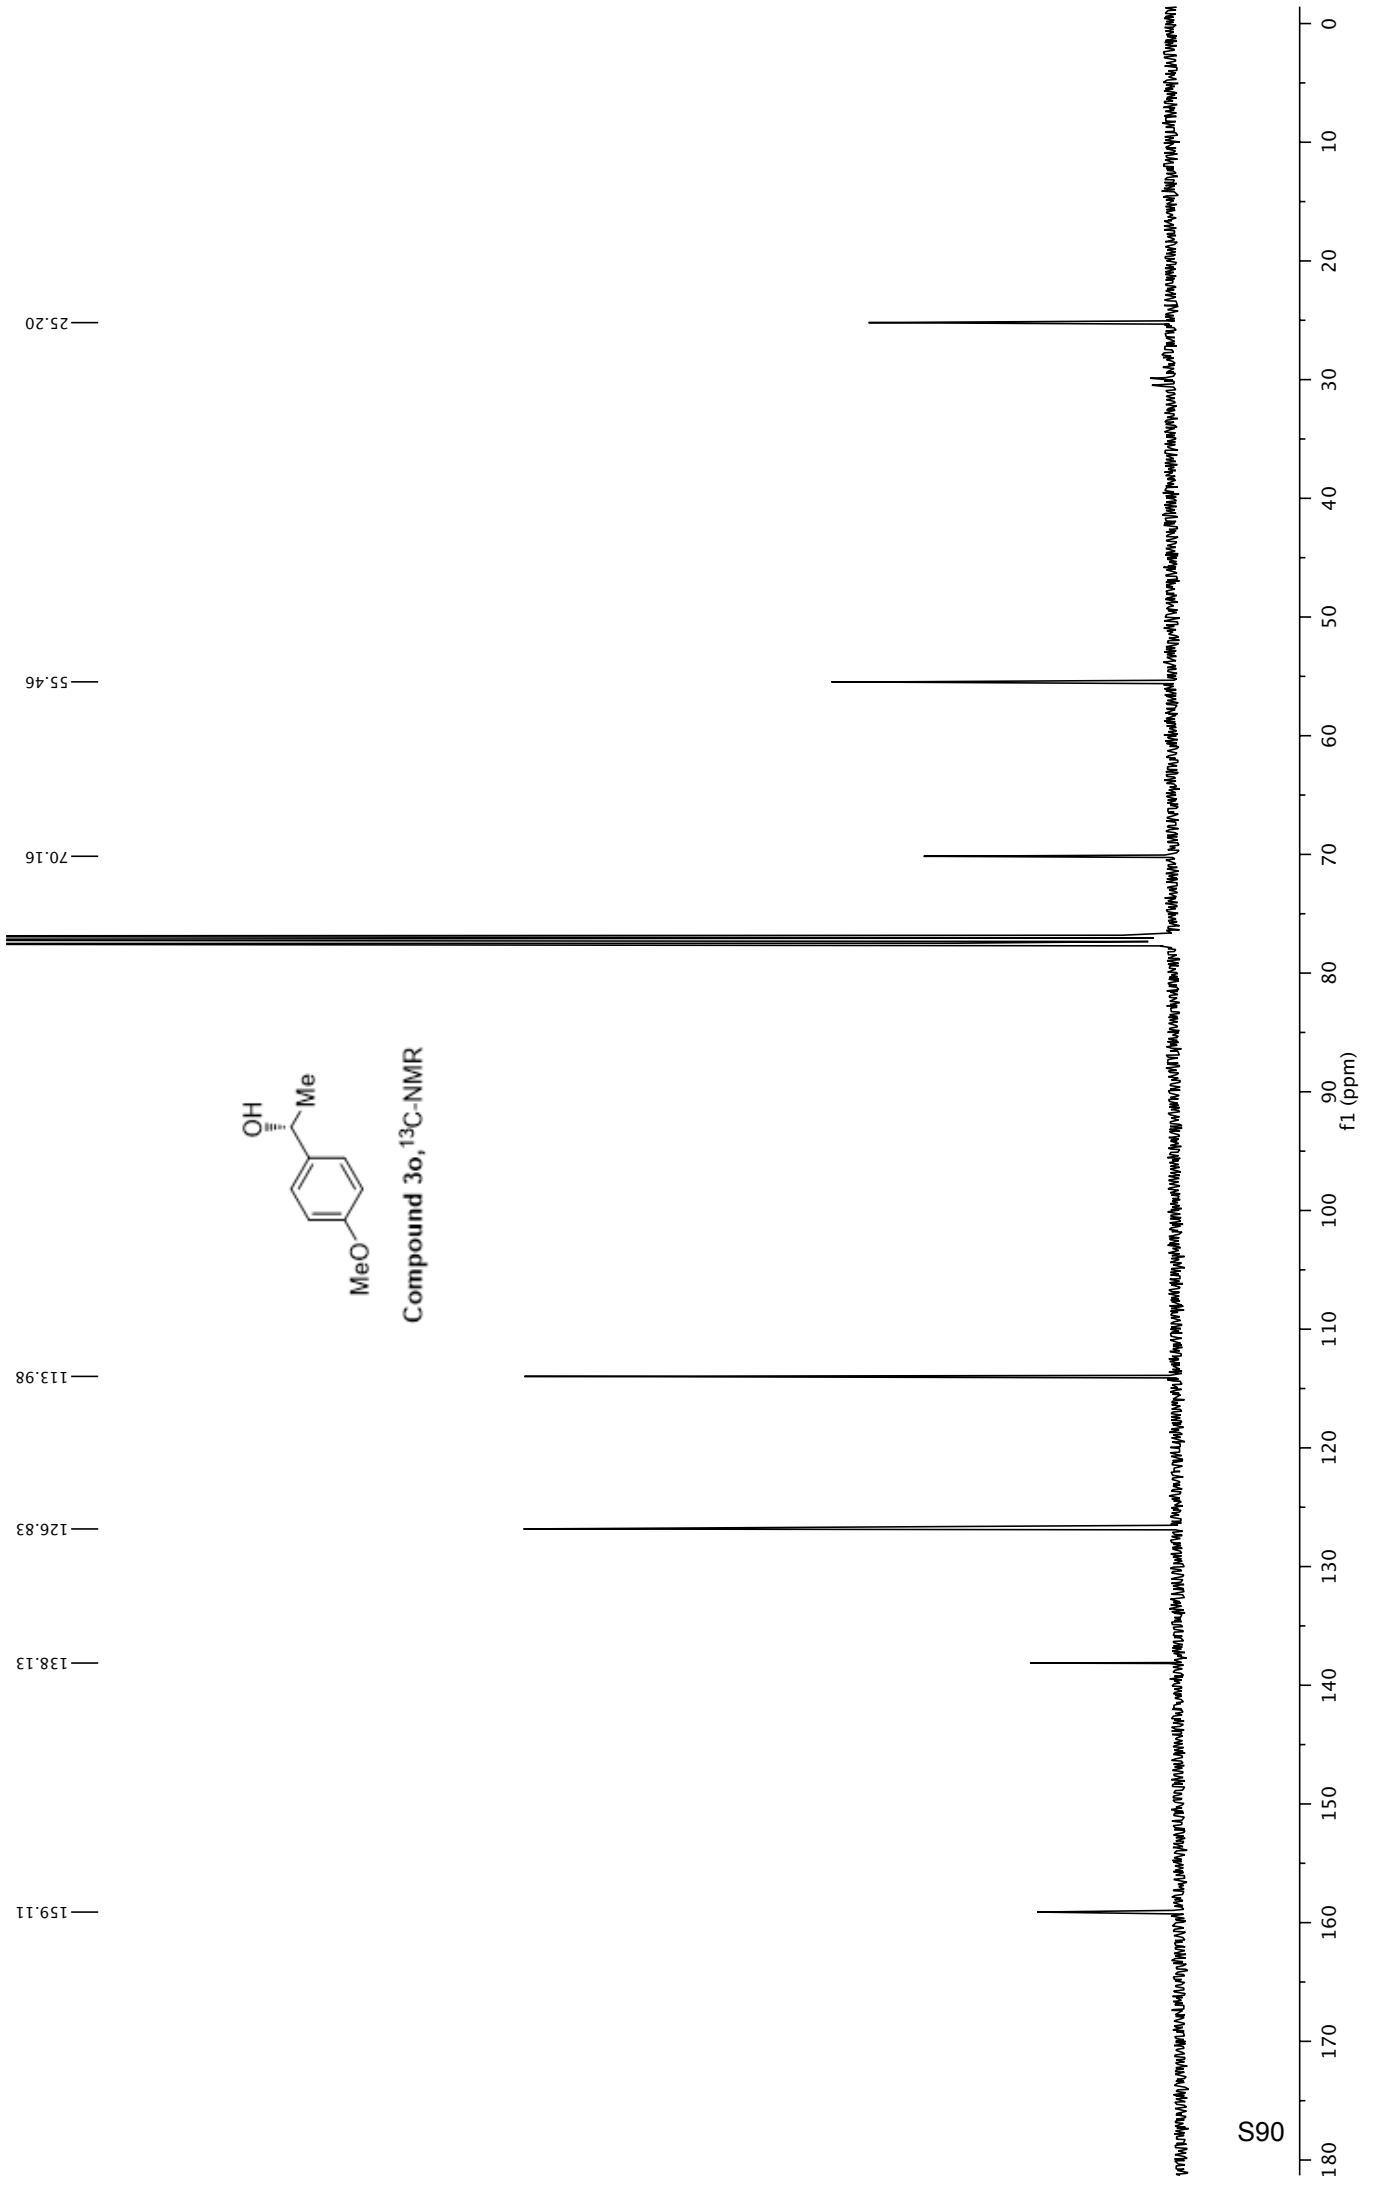

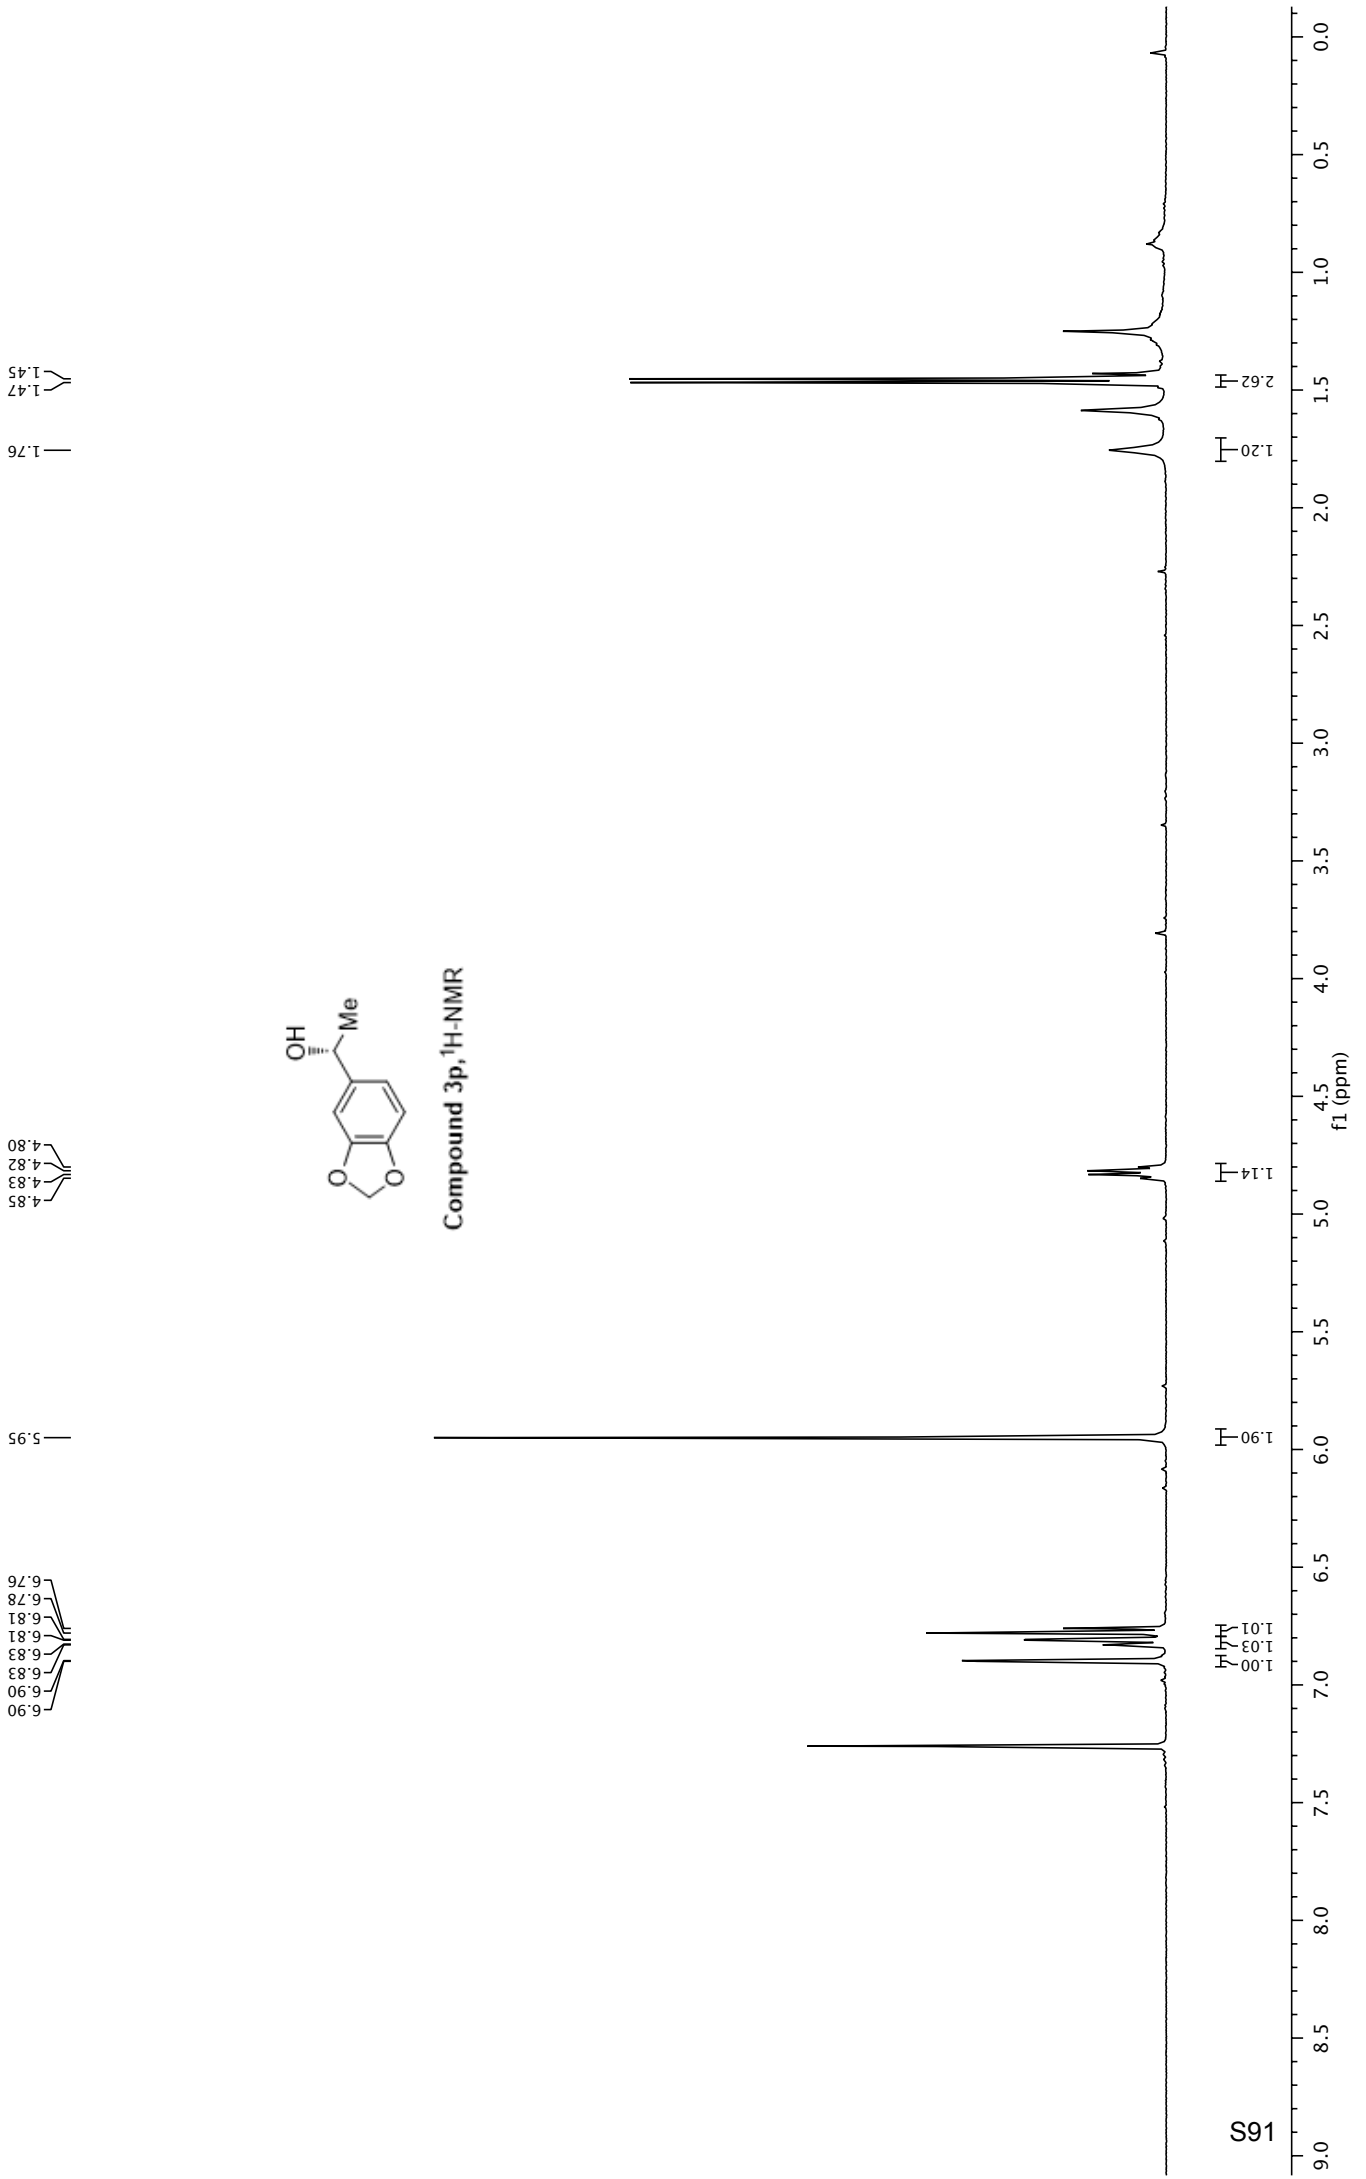

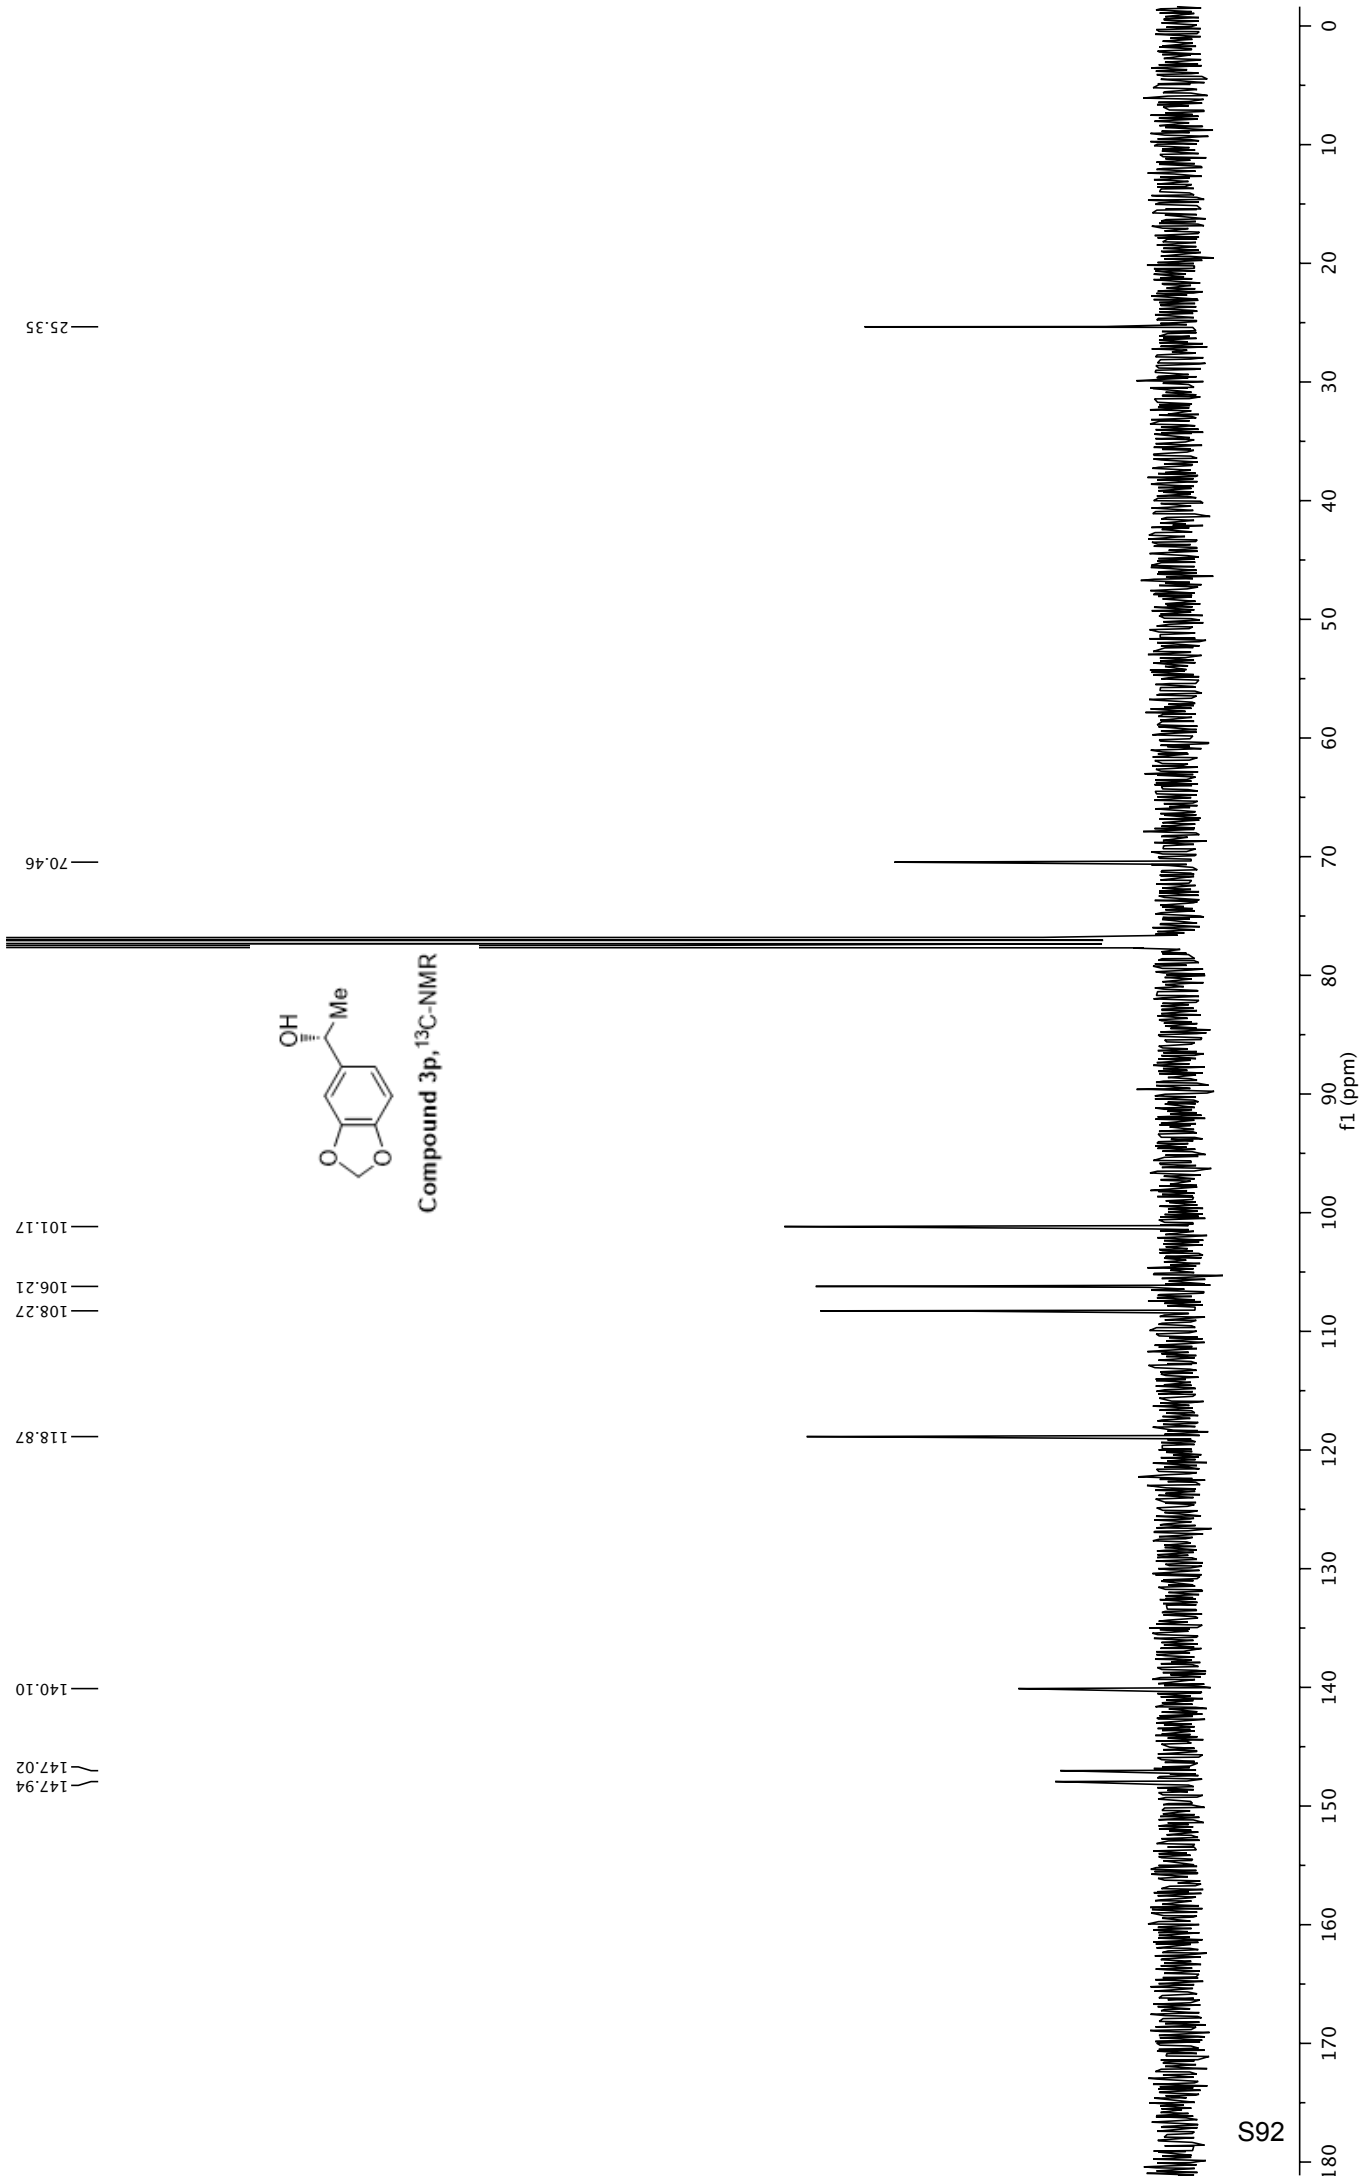

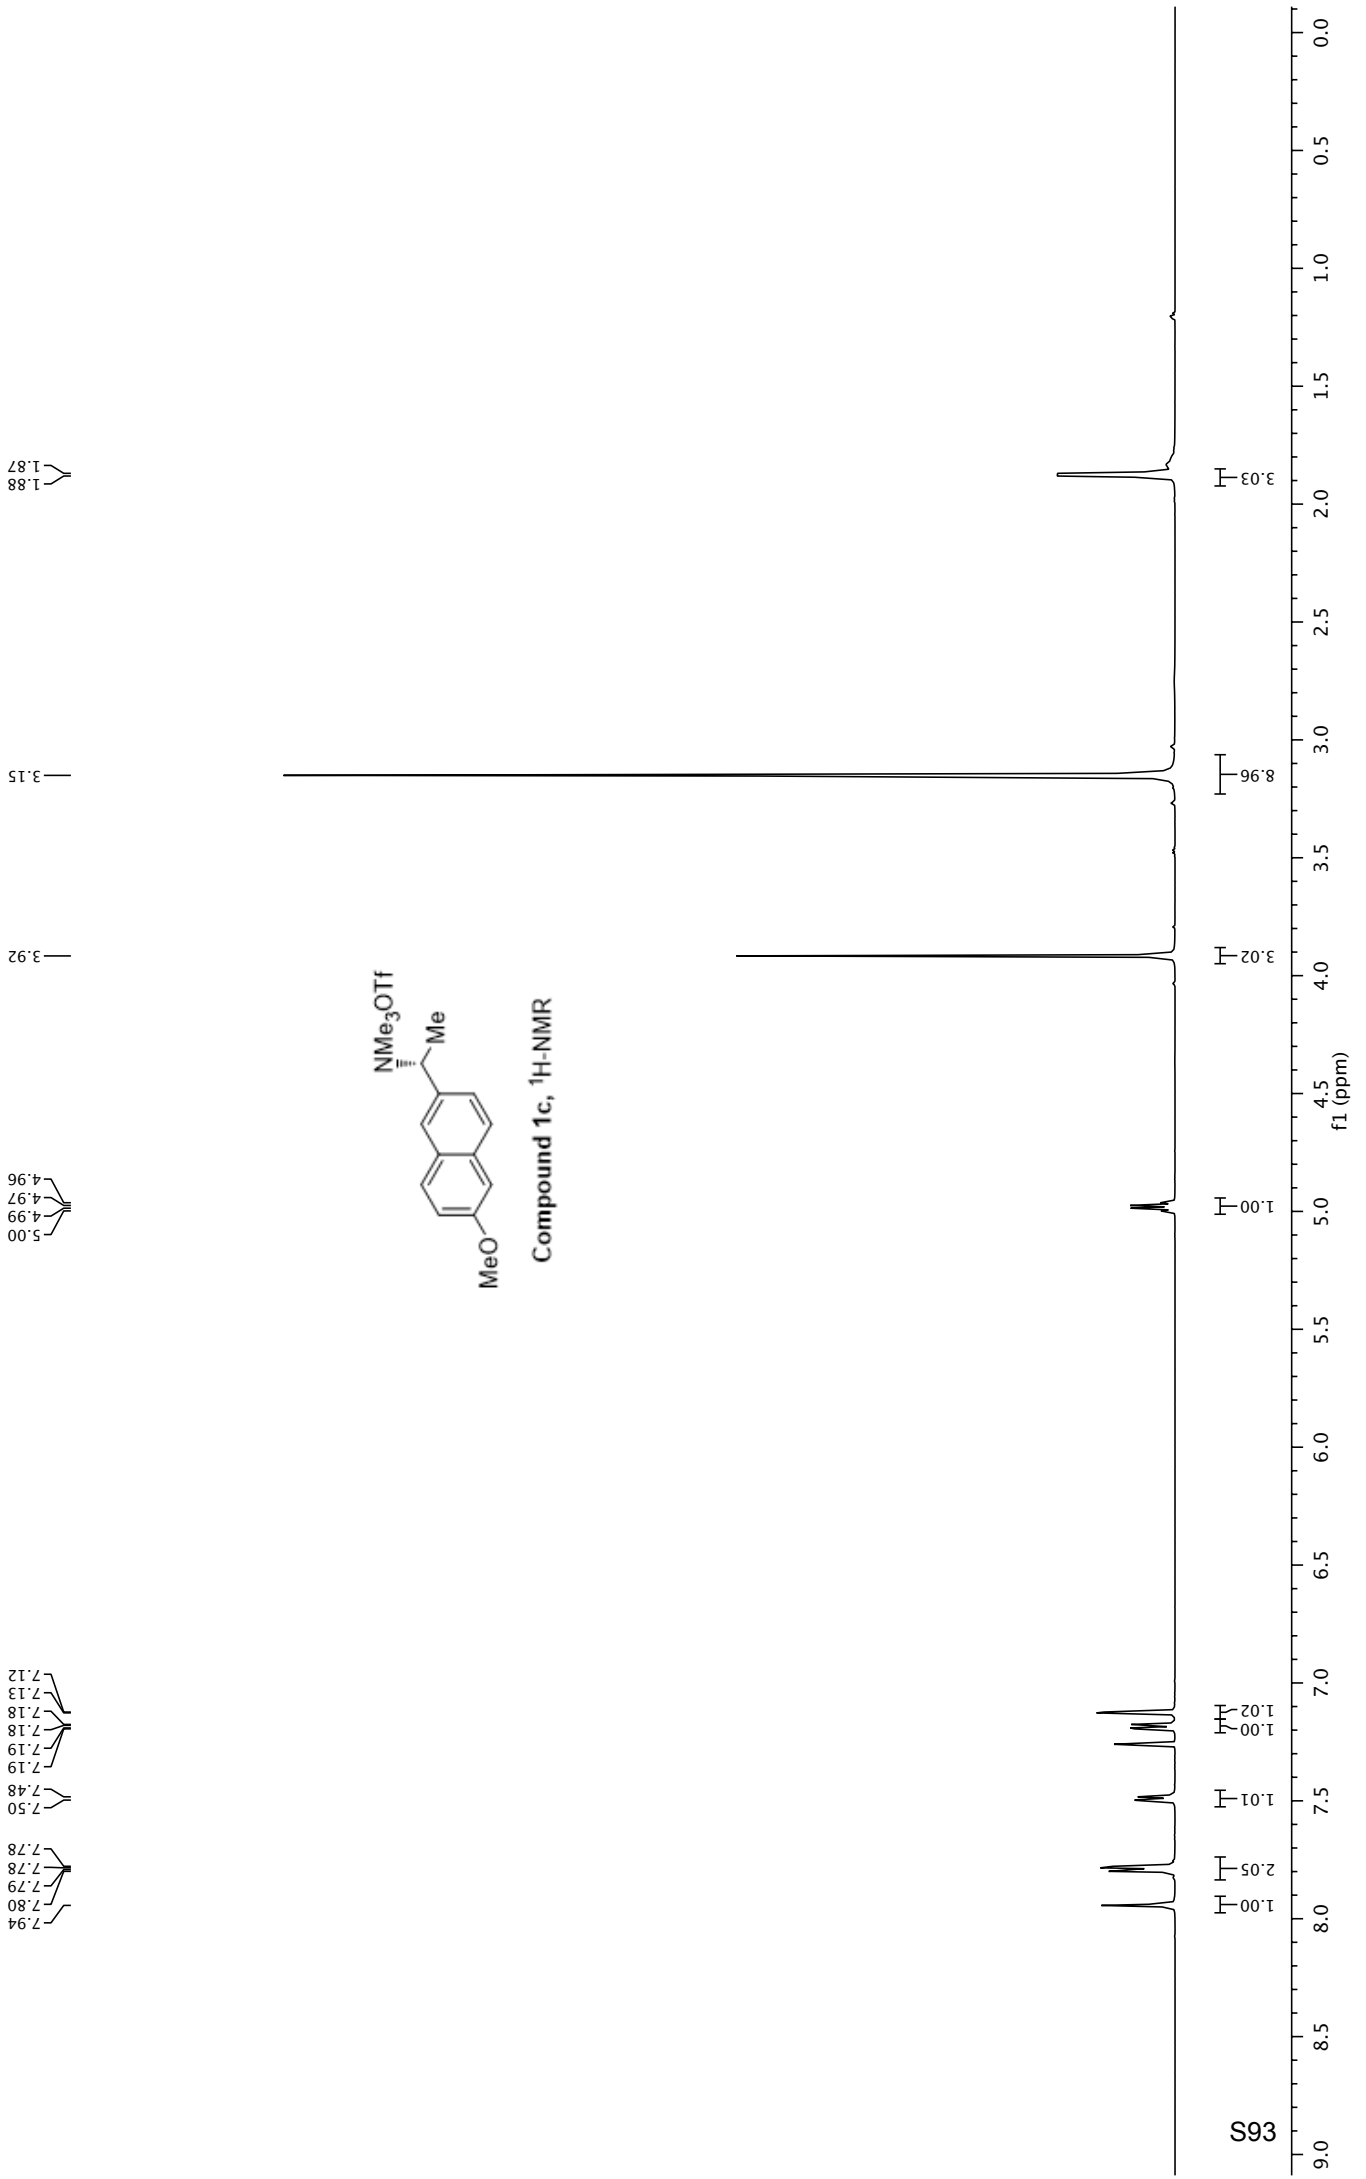

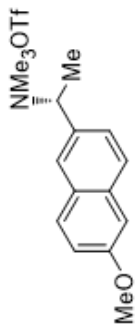

Compound 1c, <sup>13</sup>C-NMR

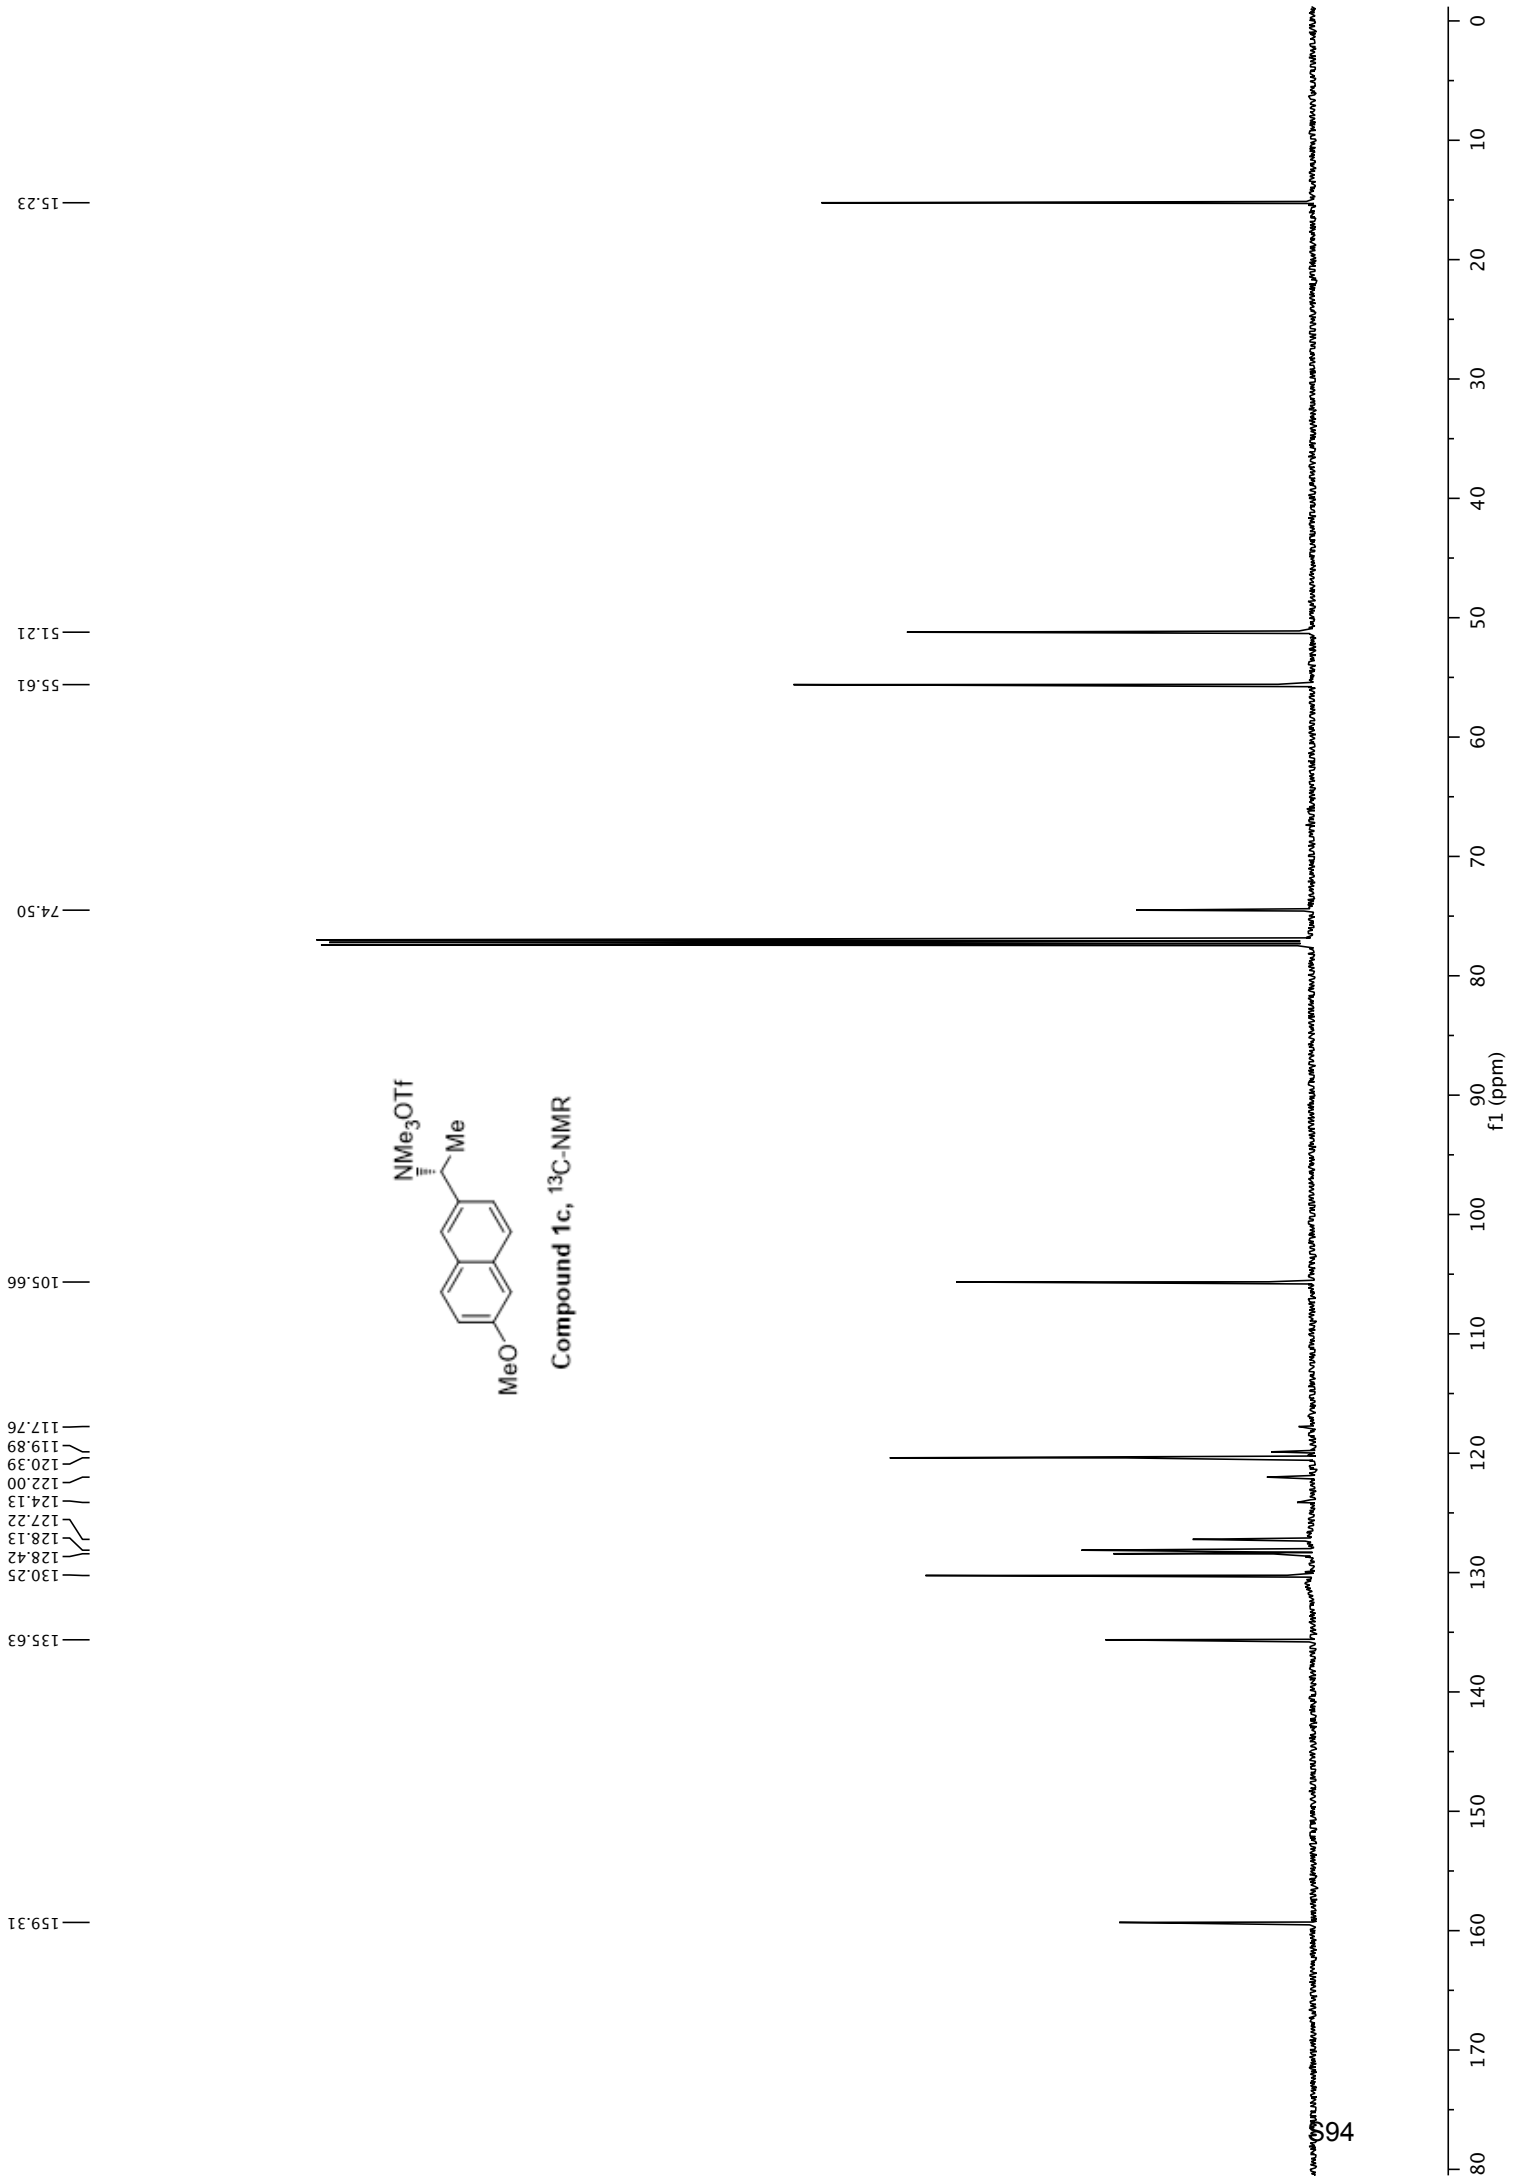

-78.39

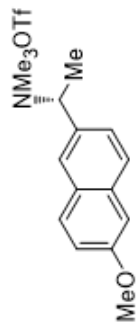

compound 1c, <sup>19</sup>F-NMR

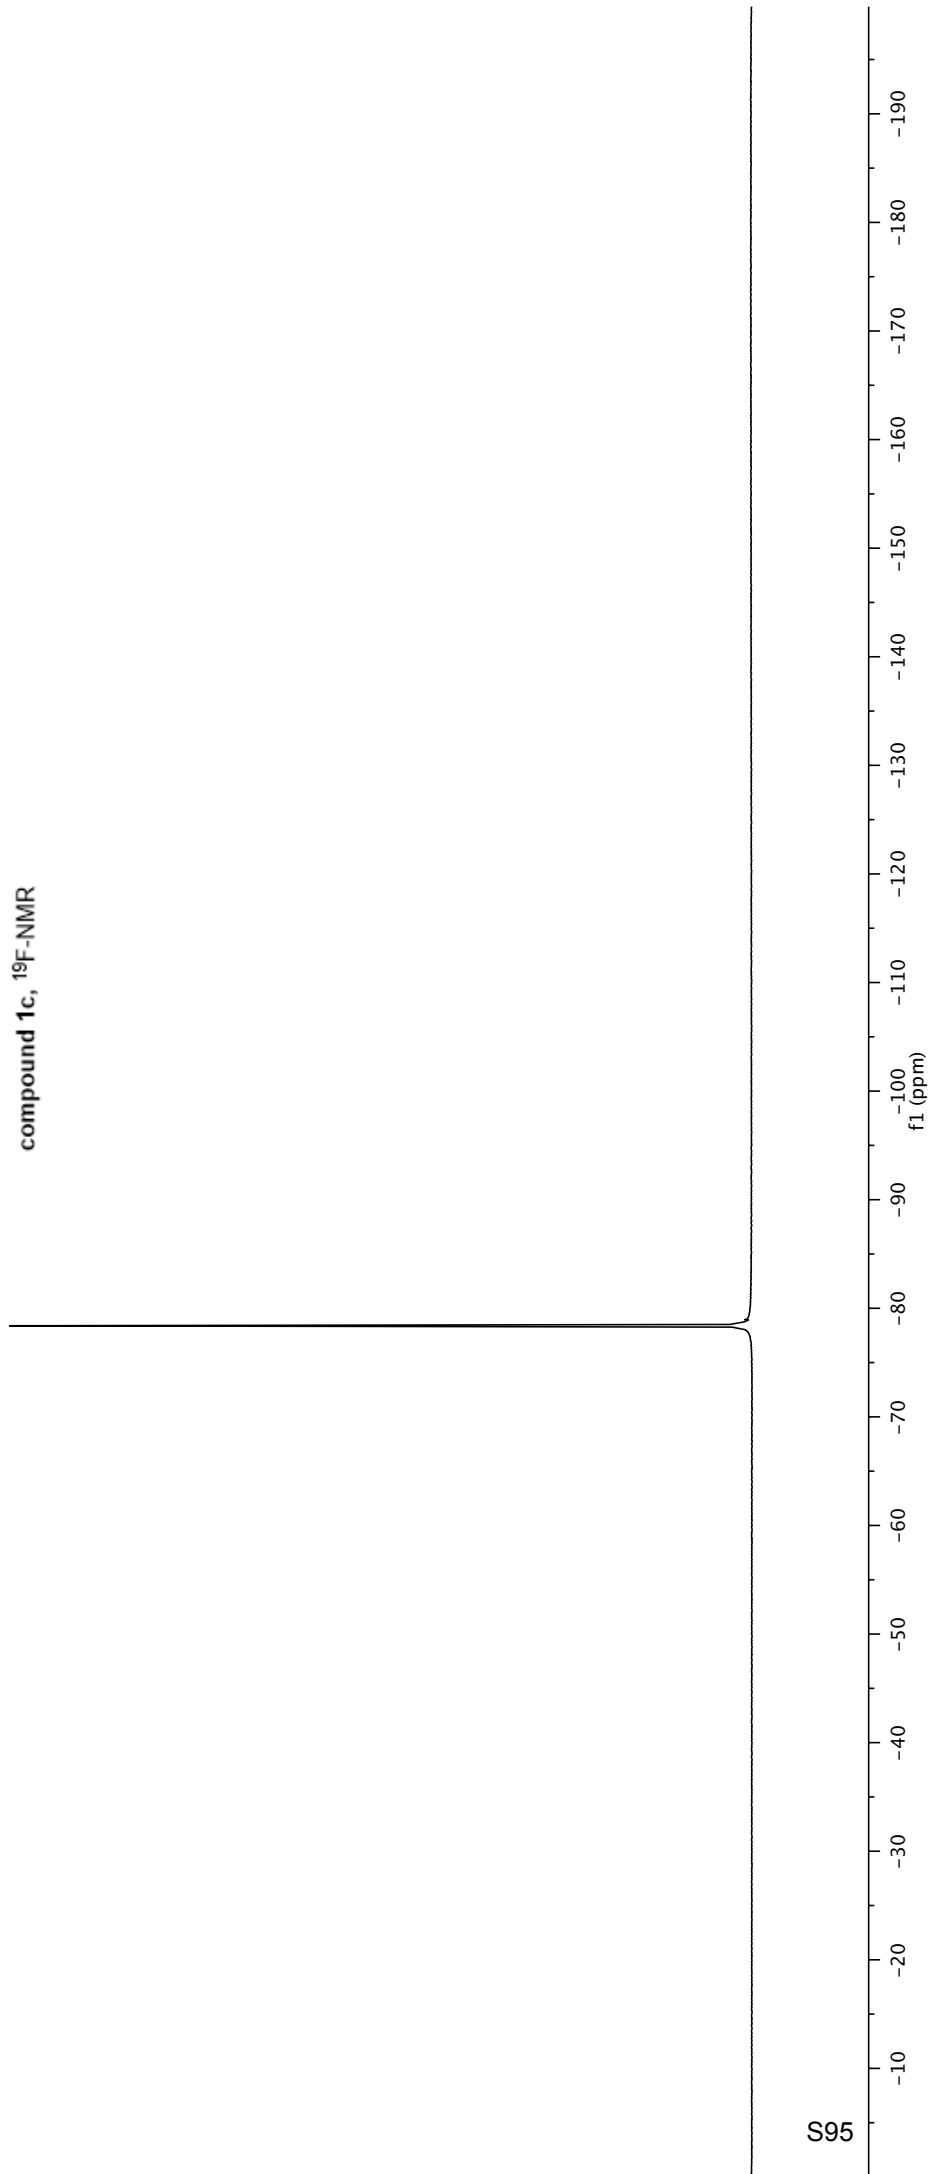

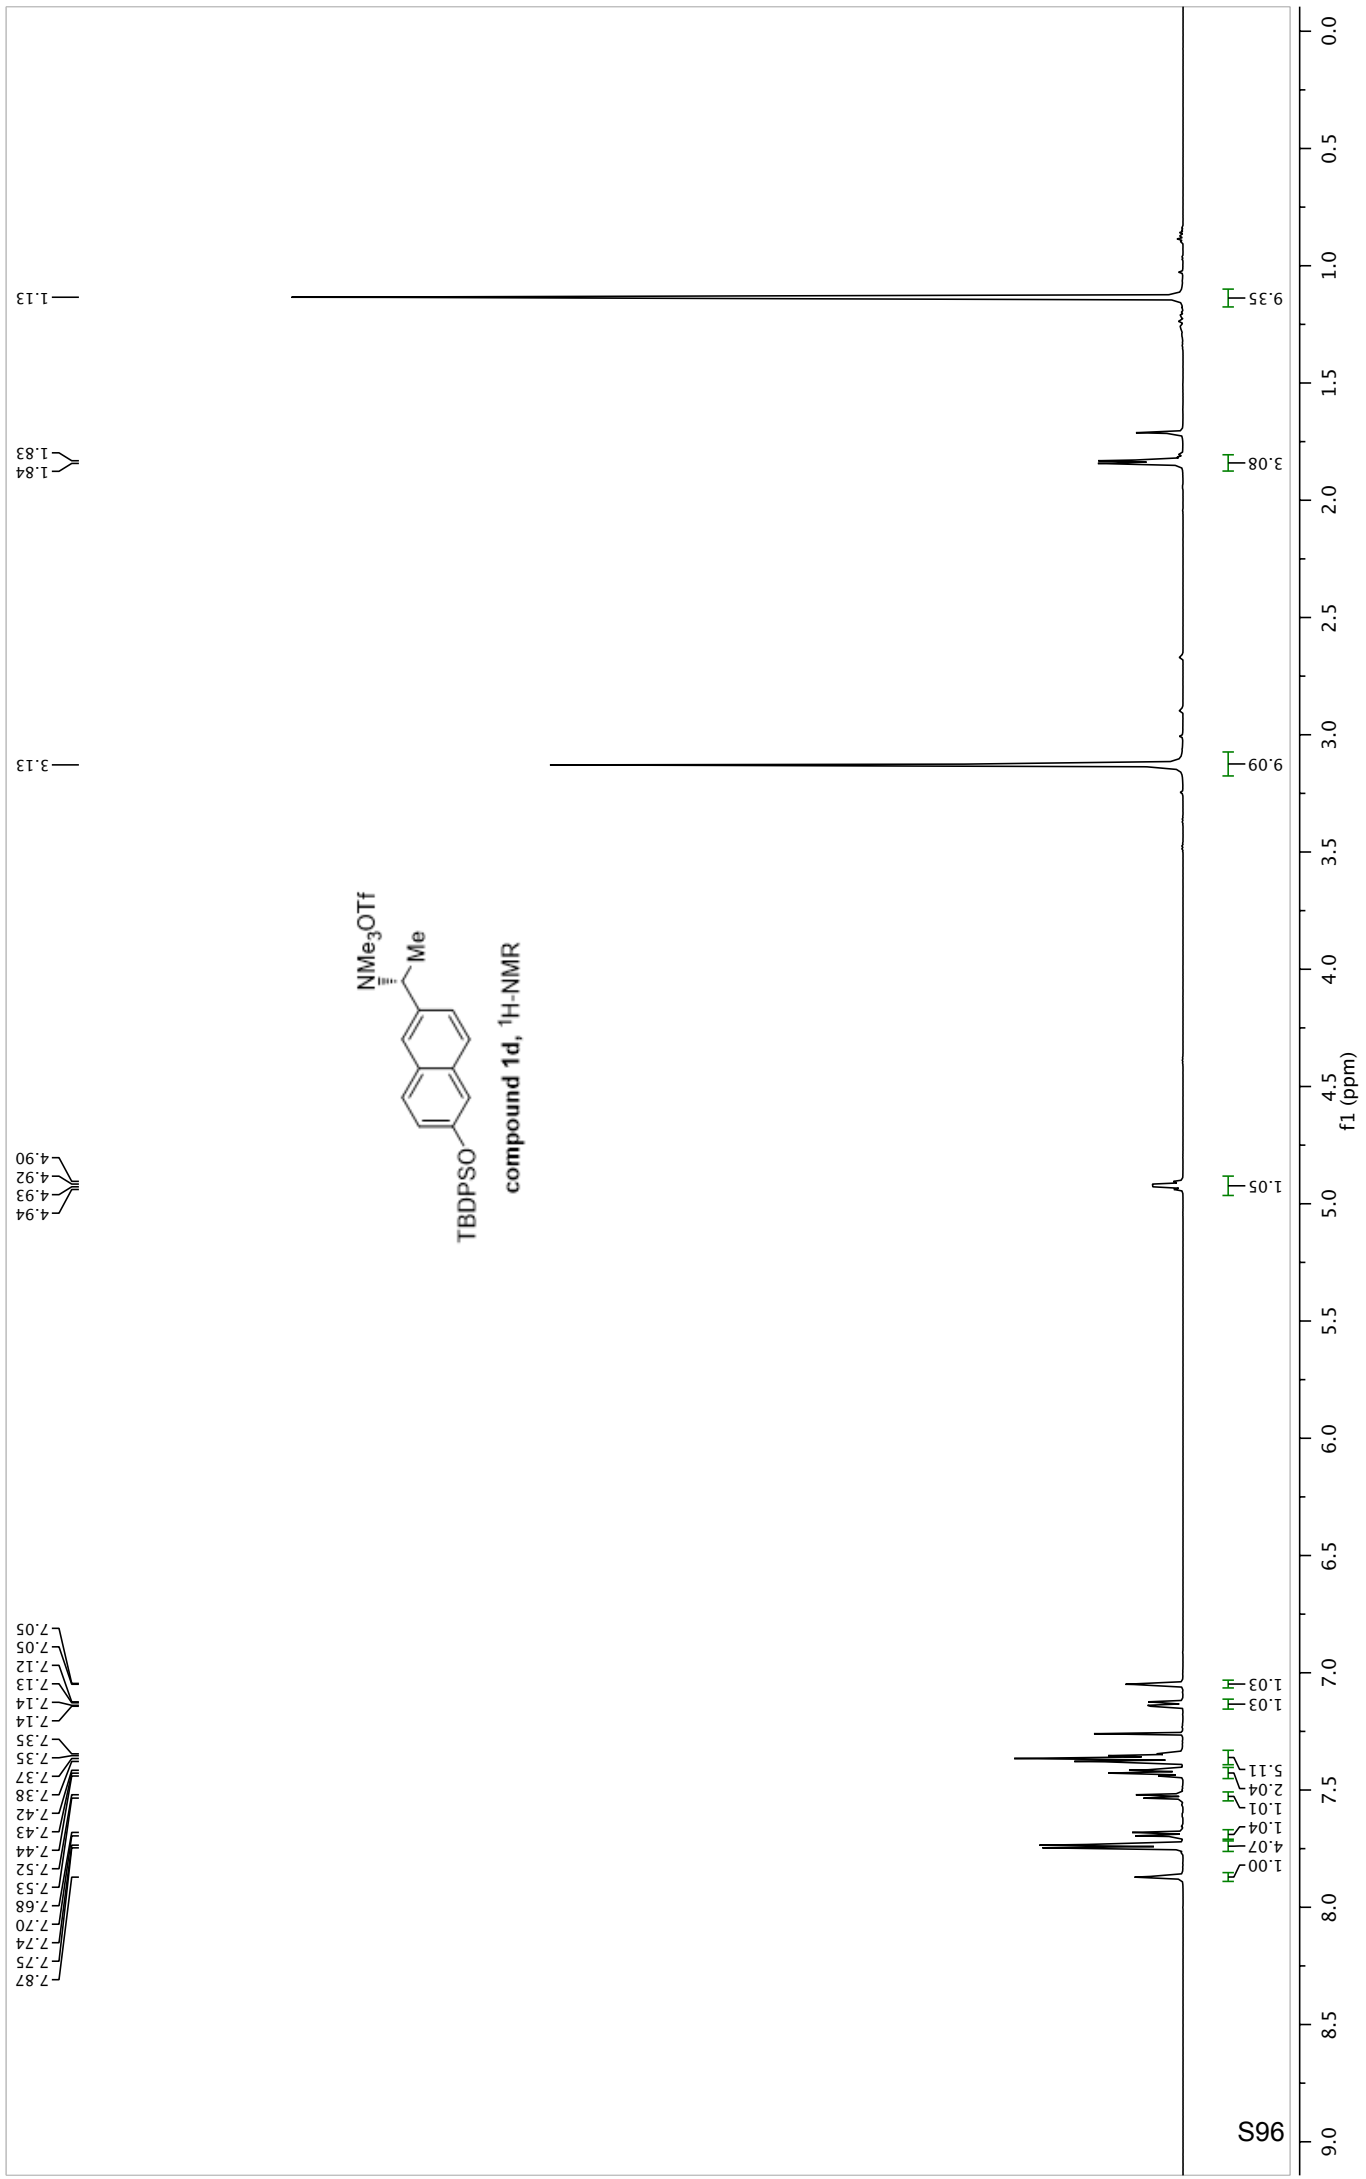



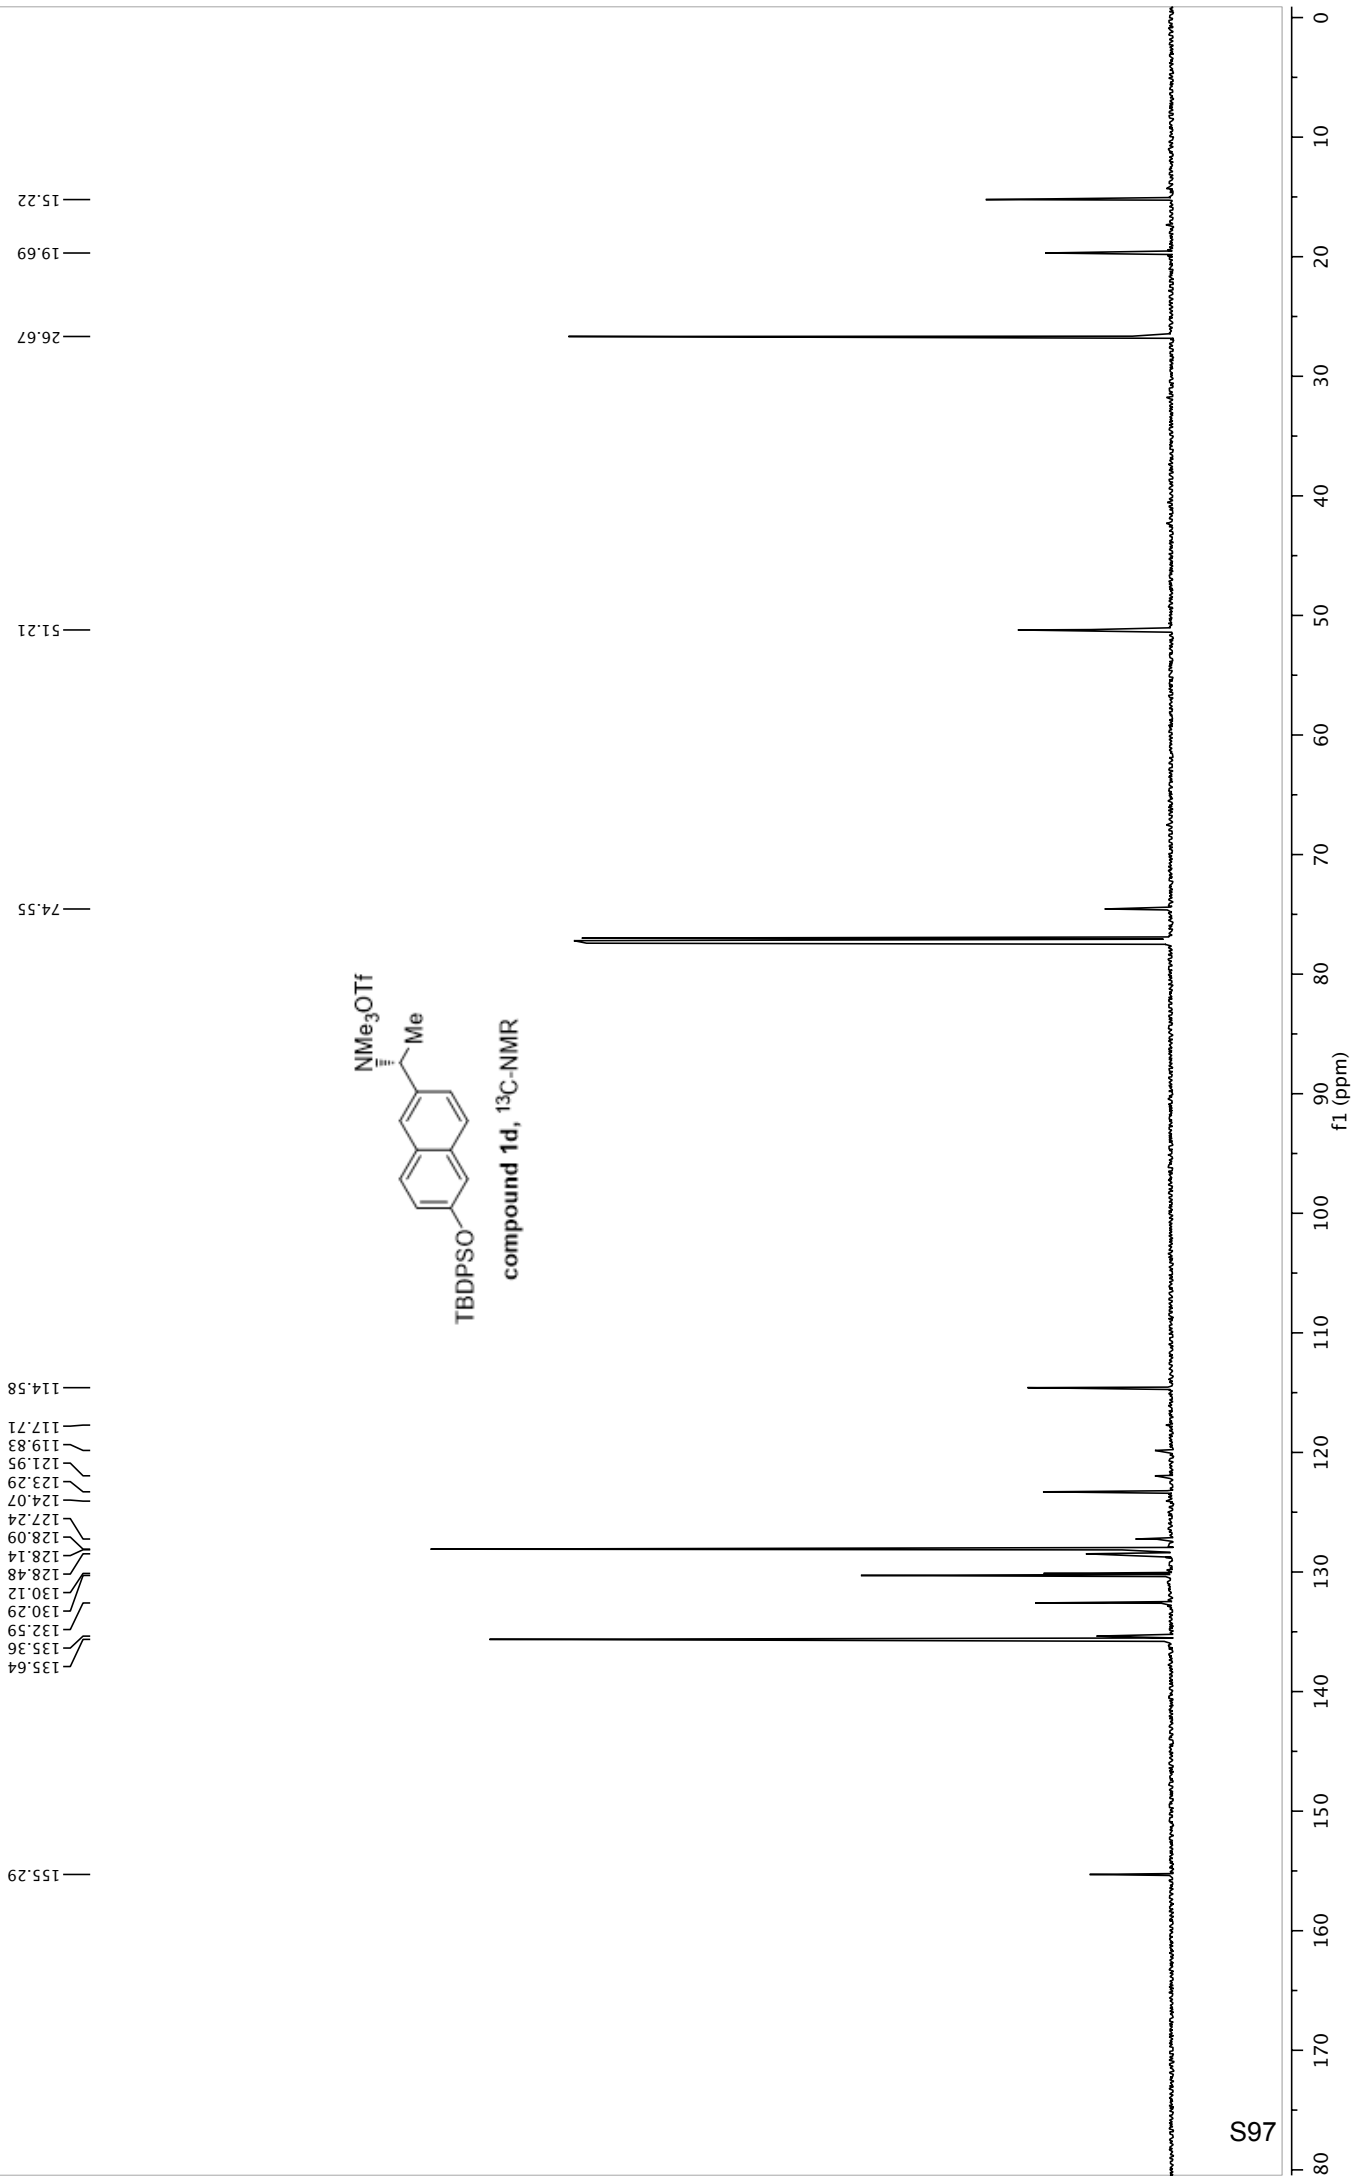

-78.38

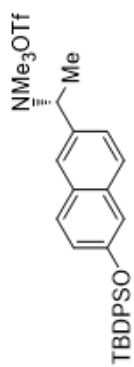

compound 1d,  $^{19}\text{F}$ -NMR

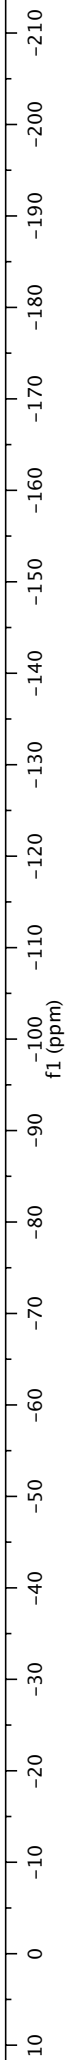

1.84  
1.85

3.11

3.98

5.27  
5.30  
5.31

7.22  
7.36  
7.38  
7.39  
7.48  
7.50  
7.51  
7.72  
7.74  
7.86  
7.88  
7.97

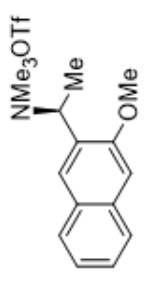

Compound 1e, <sup>1</sup>H-NMR

0.37  
2.96

1.02  
8.91

0.33  
2.95

0.13

1.00

1.11  
1.07  
1.12

1.11  
0.17  
1.00  
1.00

0.12

699

0.0  
0.5  
1.0  
1.5  
2.0  
2.5  
3.0  
3.5  
4.0  
4.5  
5.0  
5.5  
6.0  
6.5  
7.0  
7.5  
8.0  
8.5  
9.0

f1 (ppm)

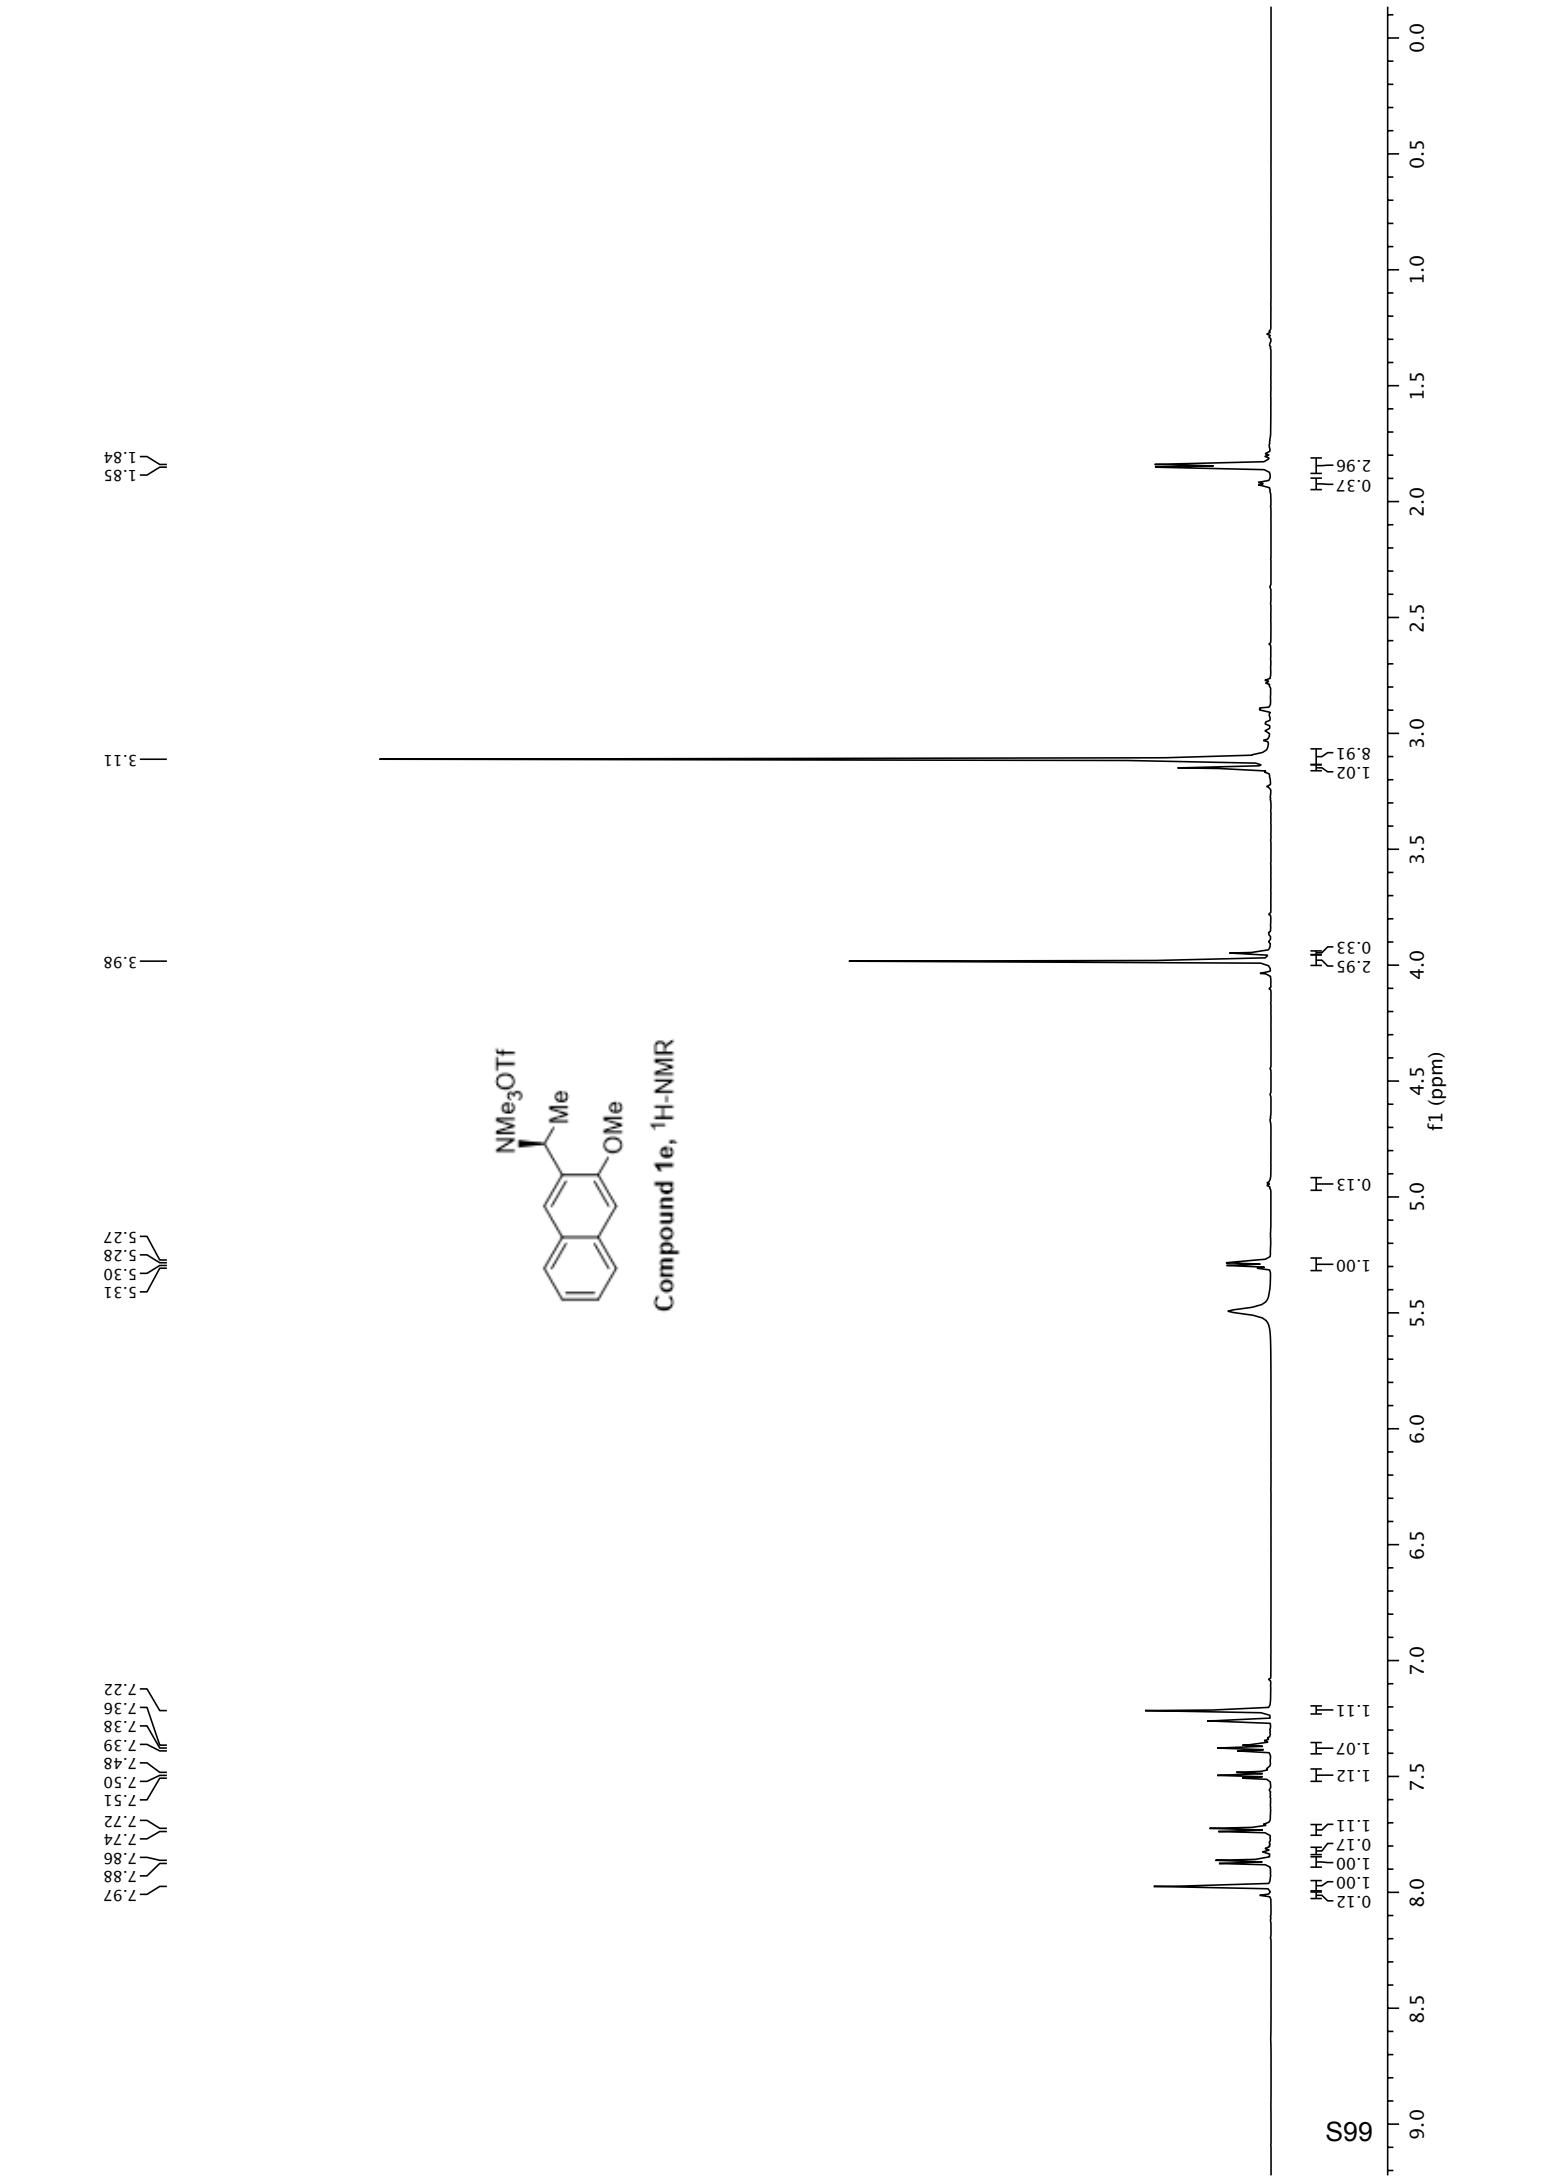

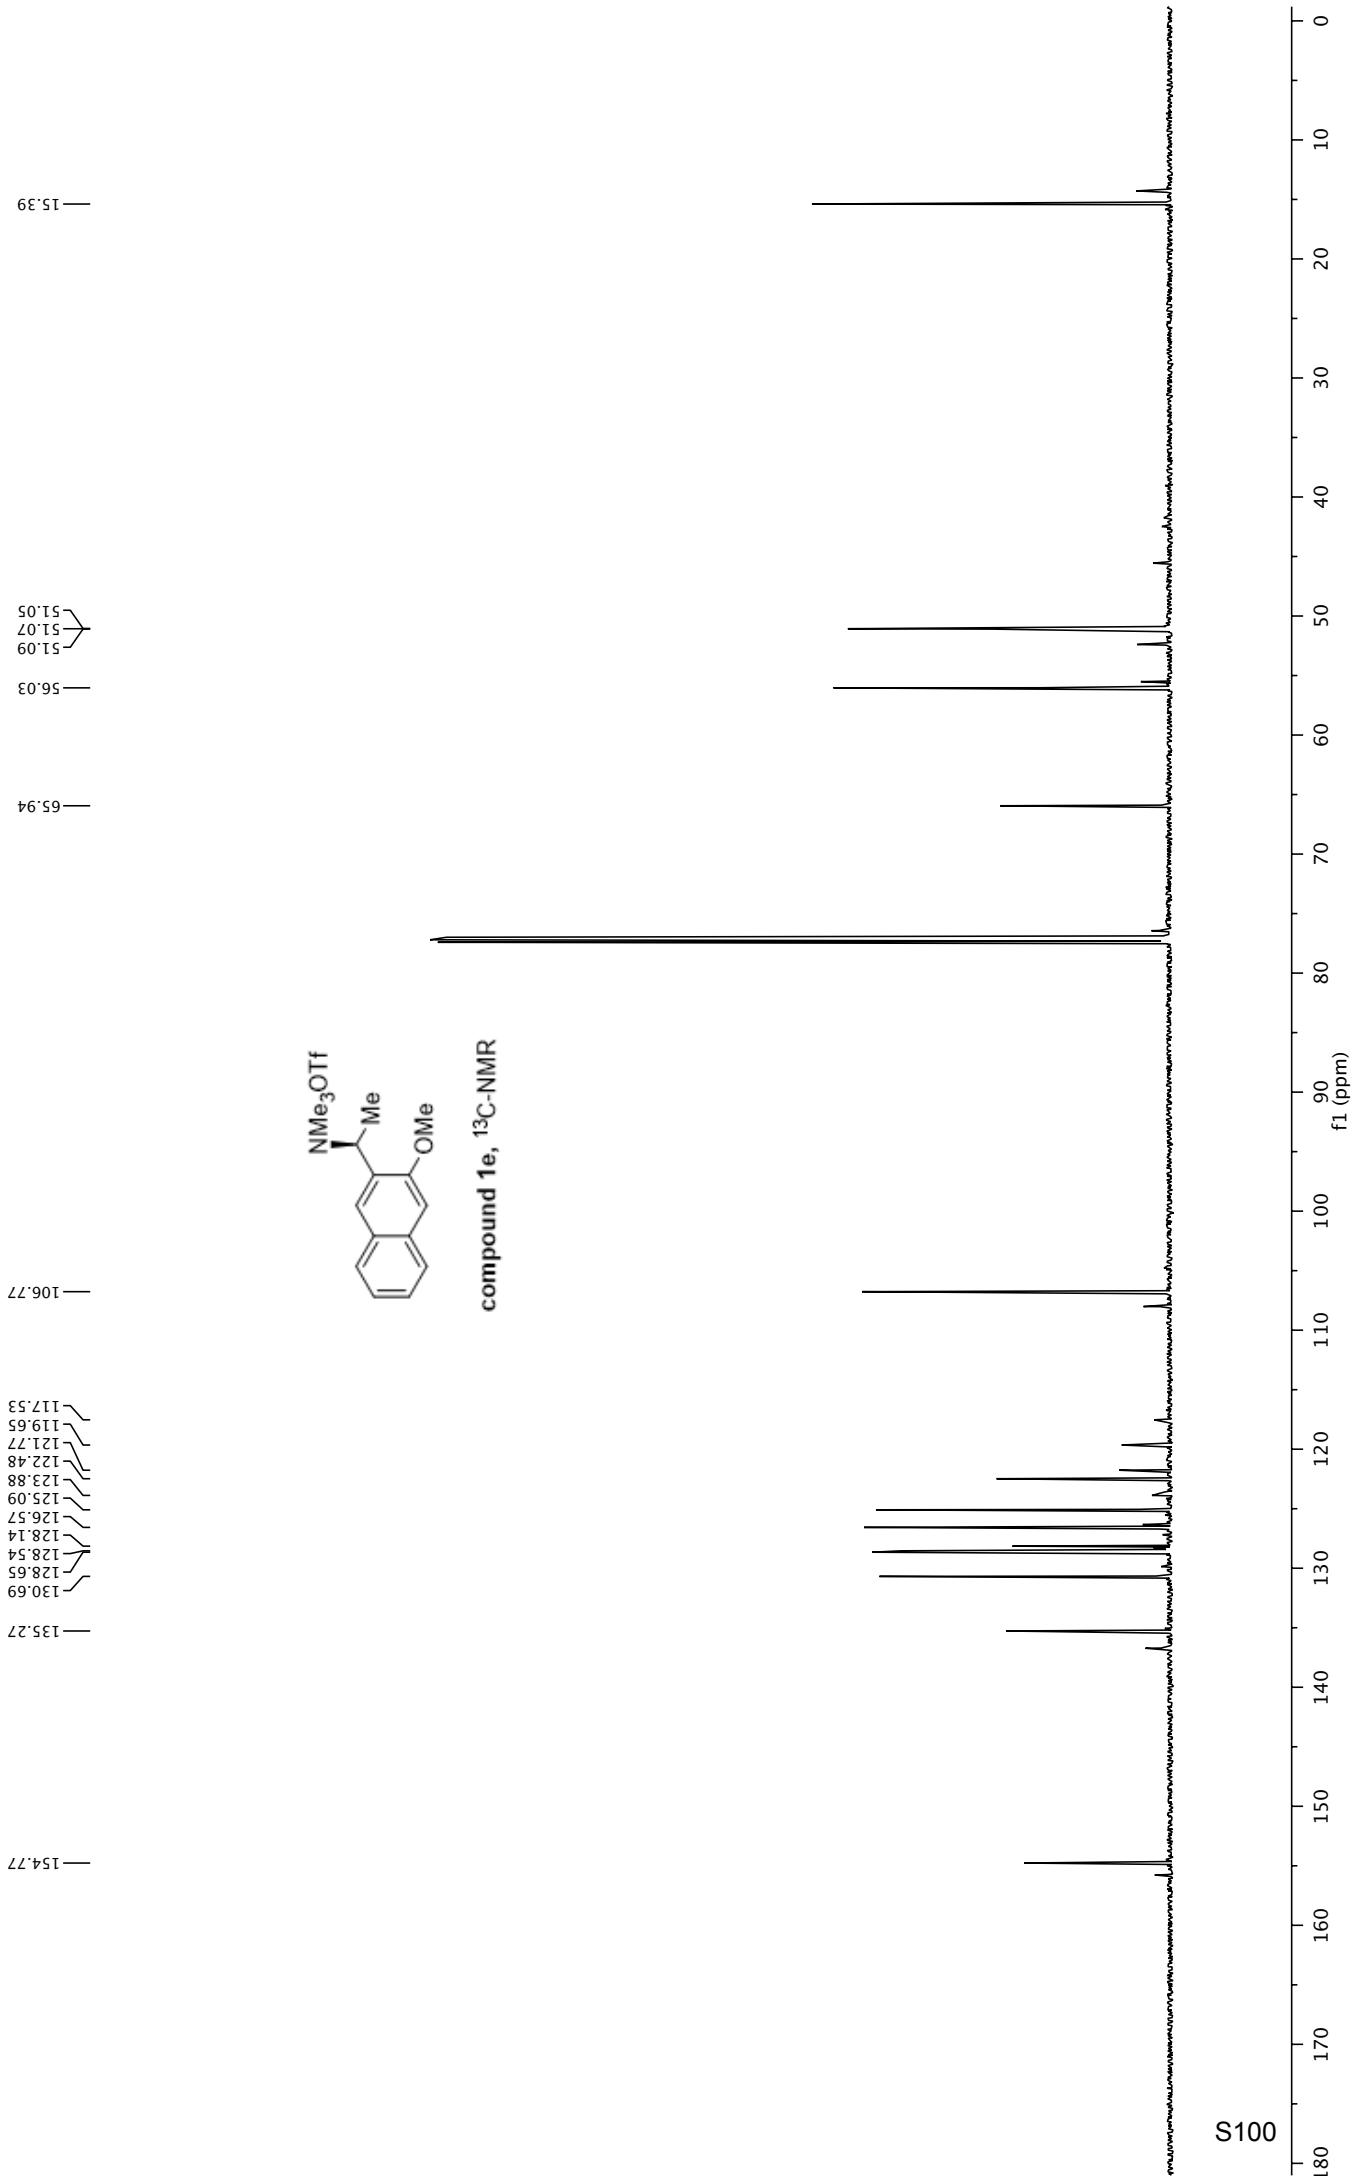

-78.42

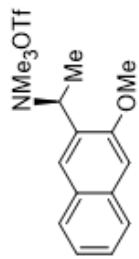

Compound 1e, <sup>19</sup>F-NMR

f1 (ppm)

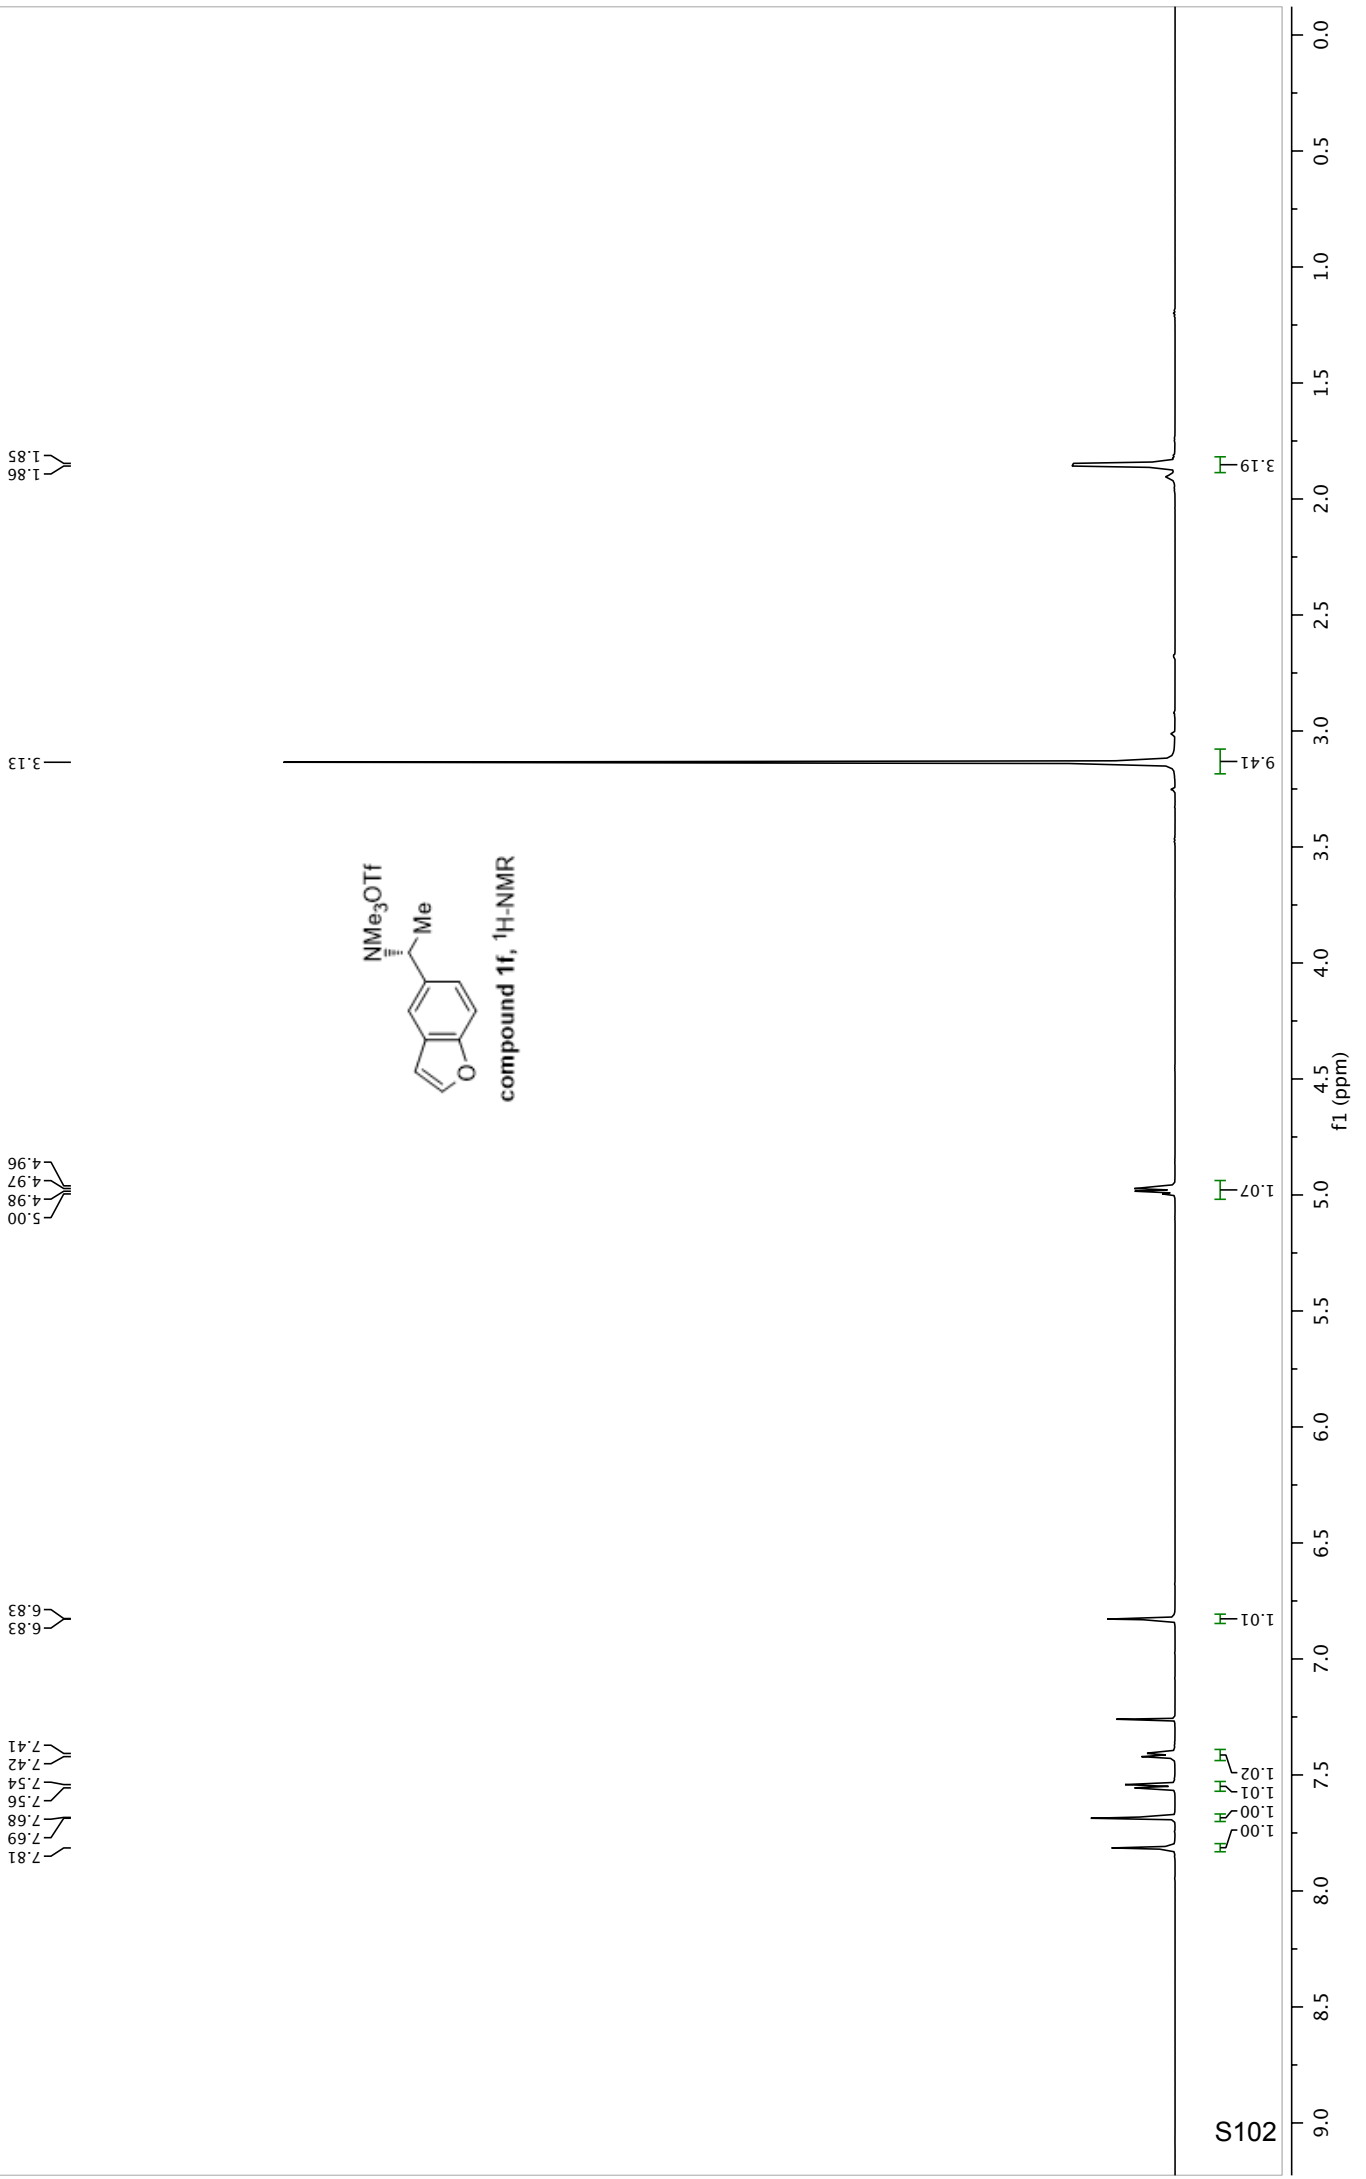

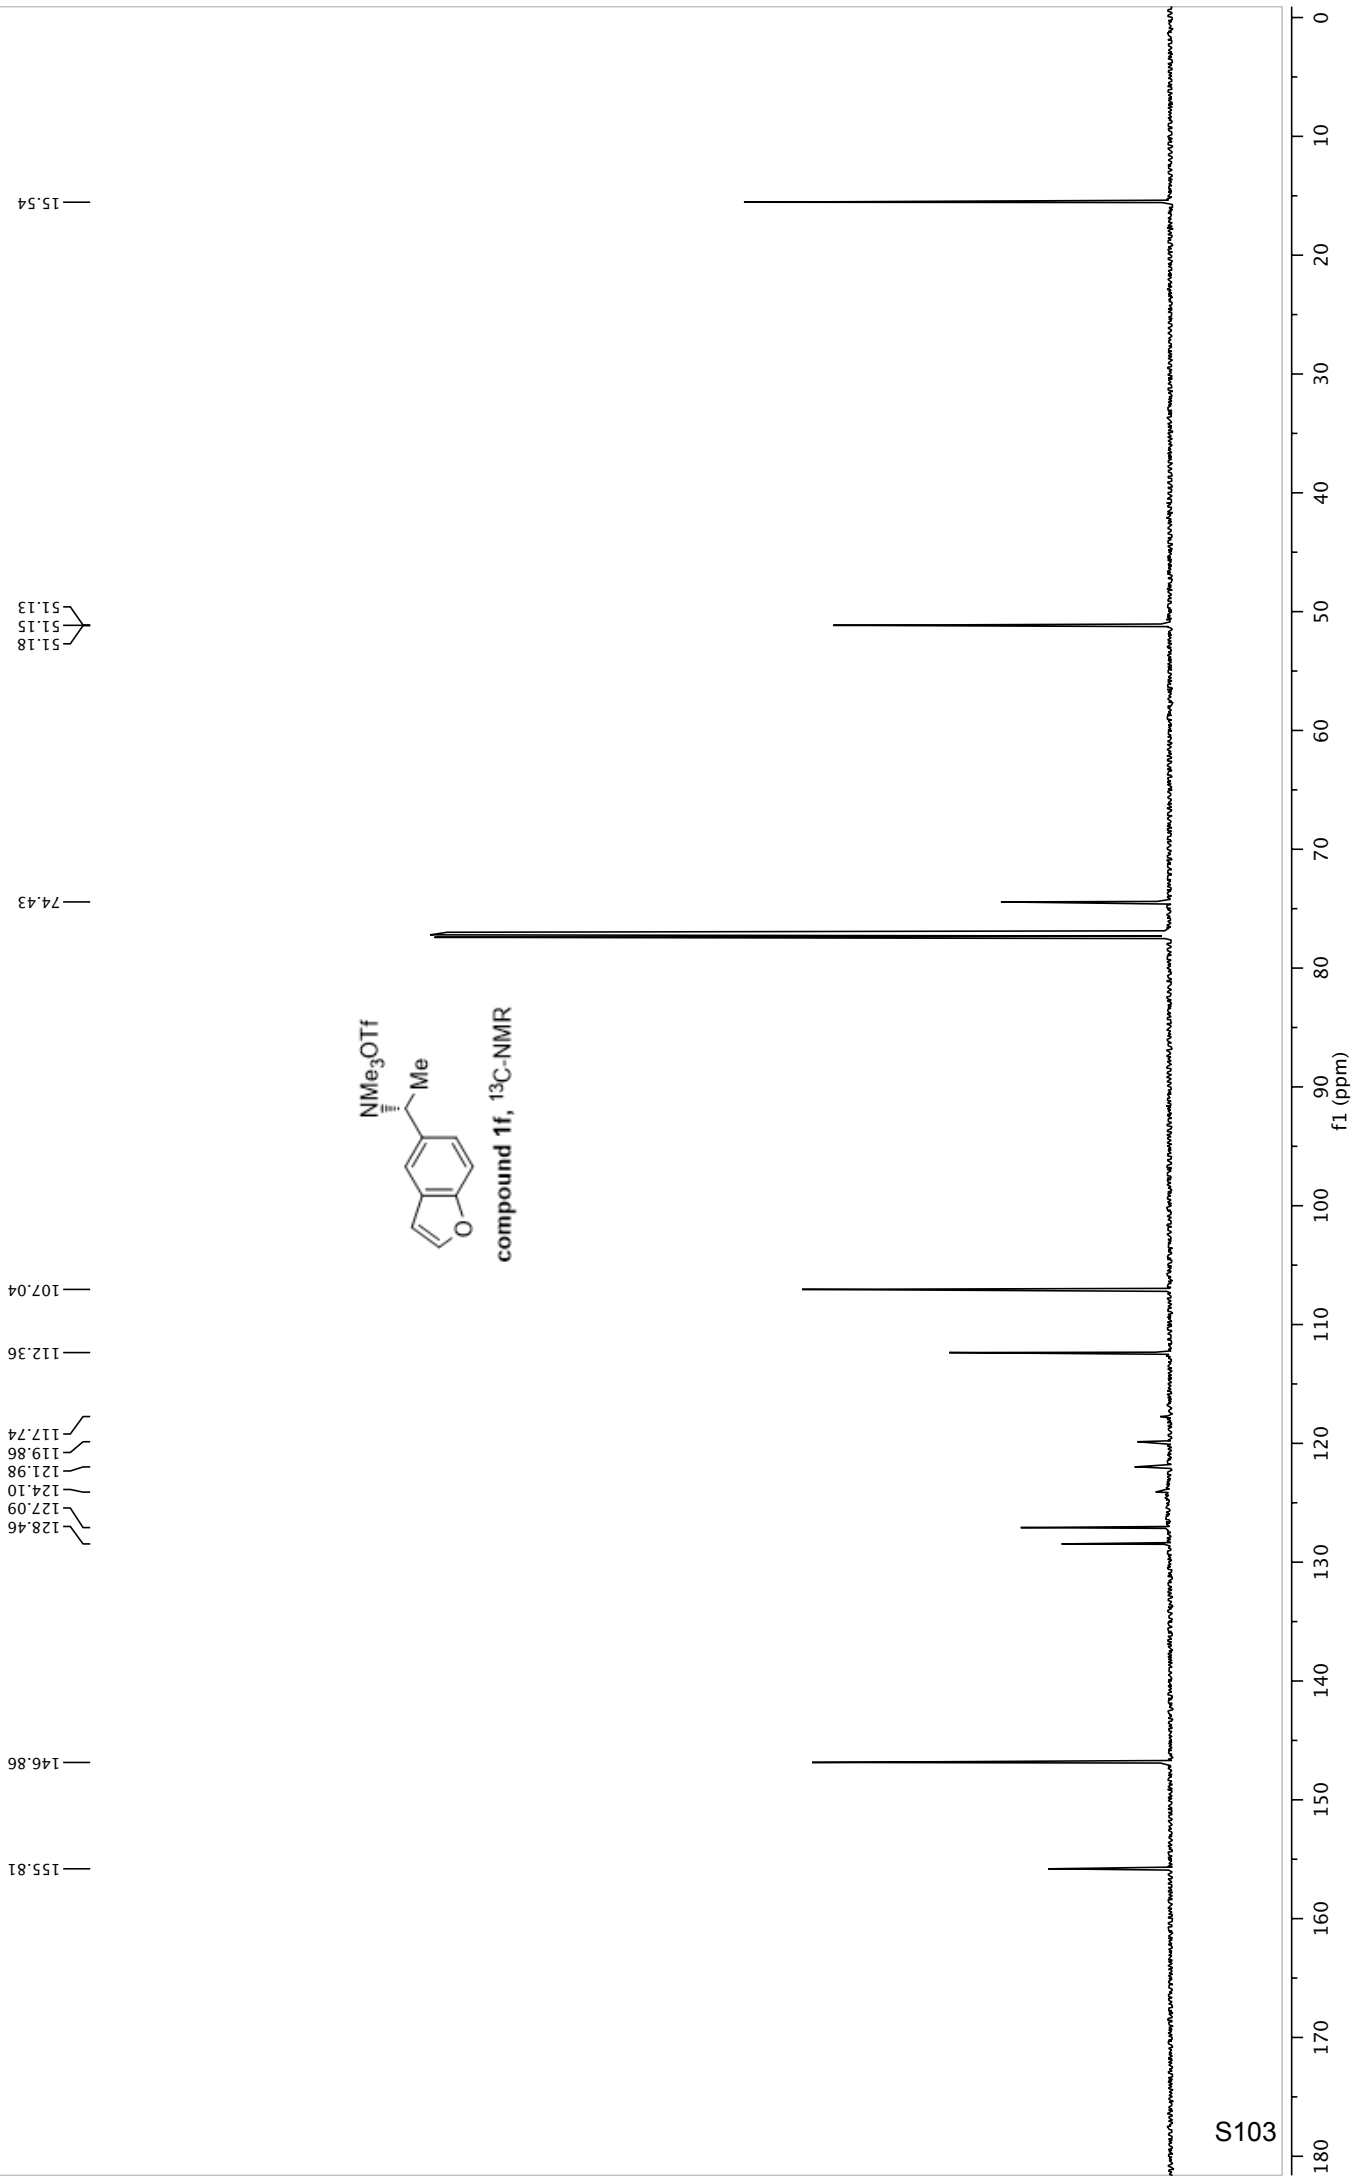

-78.39

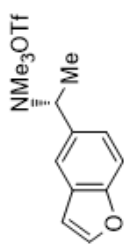

compound **1f**, <sup>19</sup>F-NMR

S104





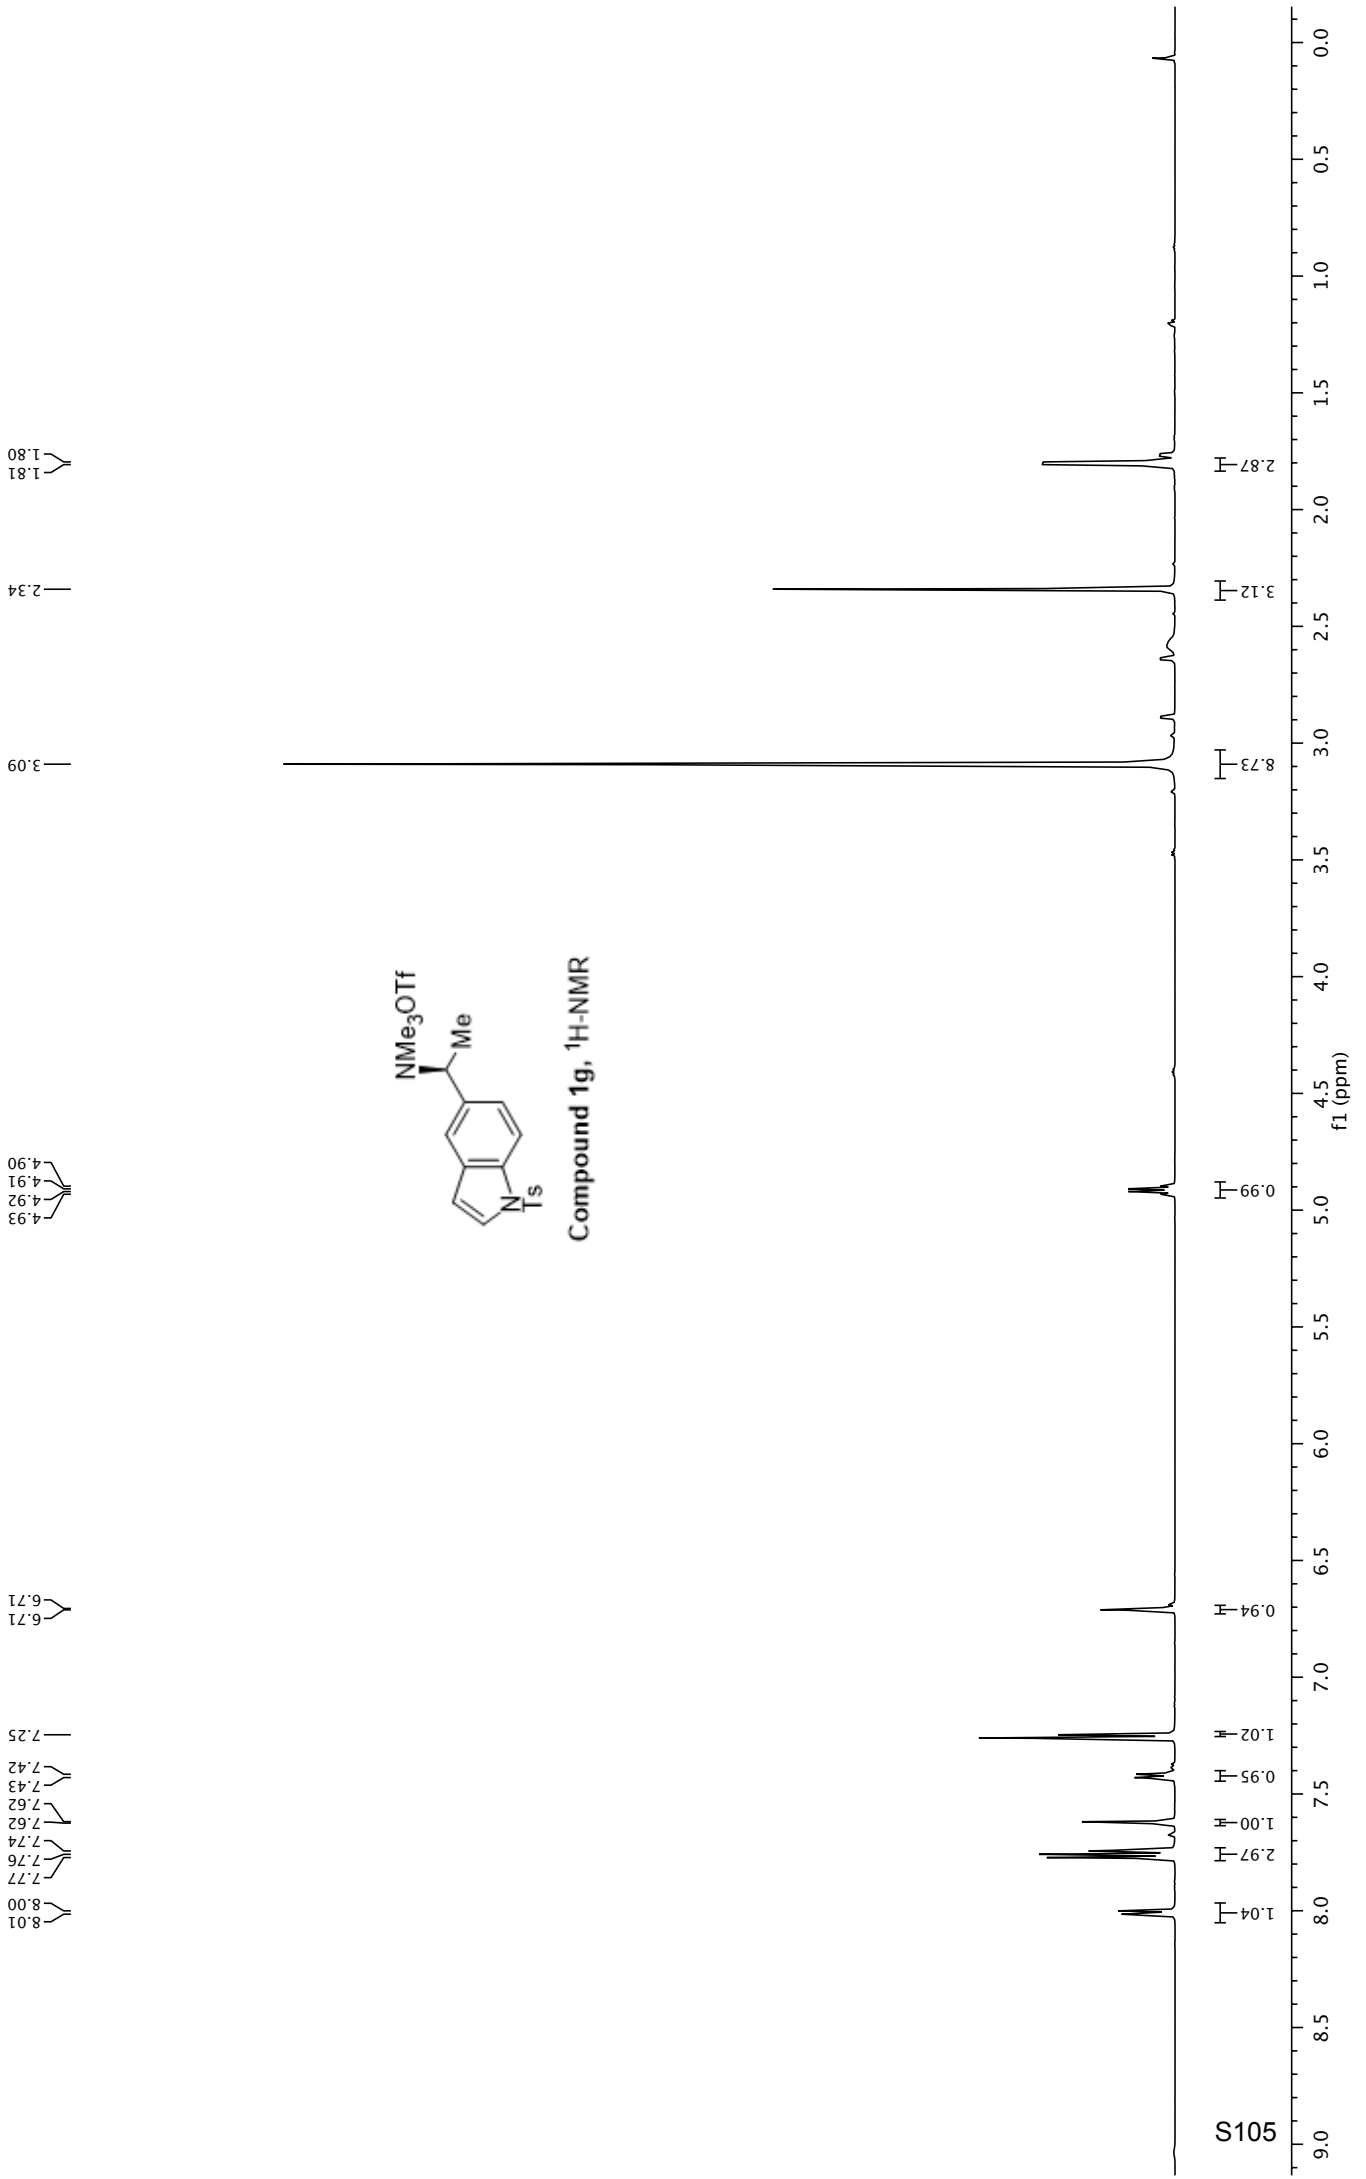

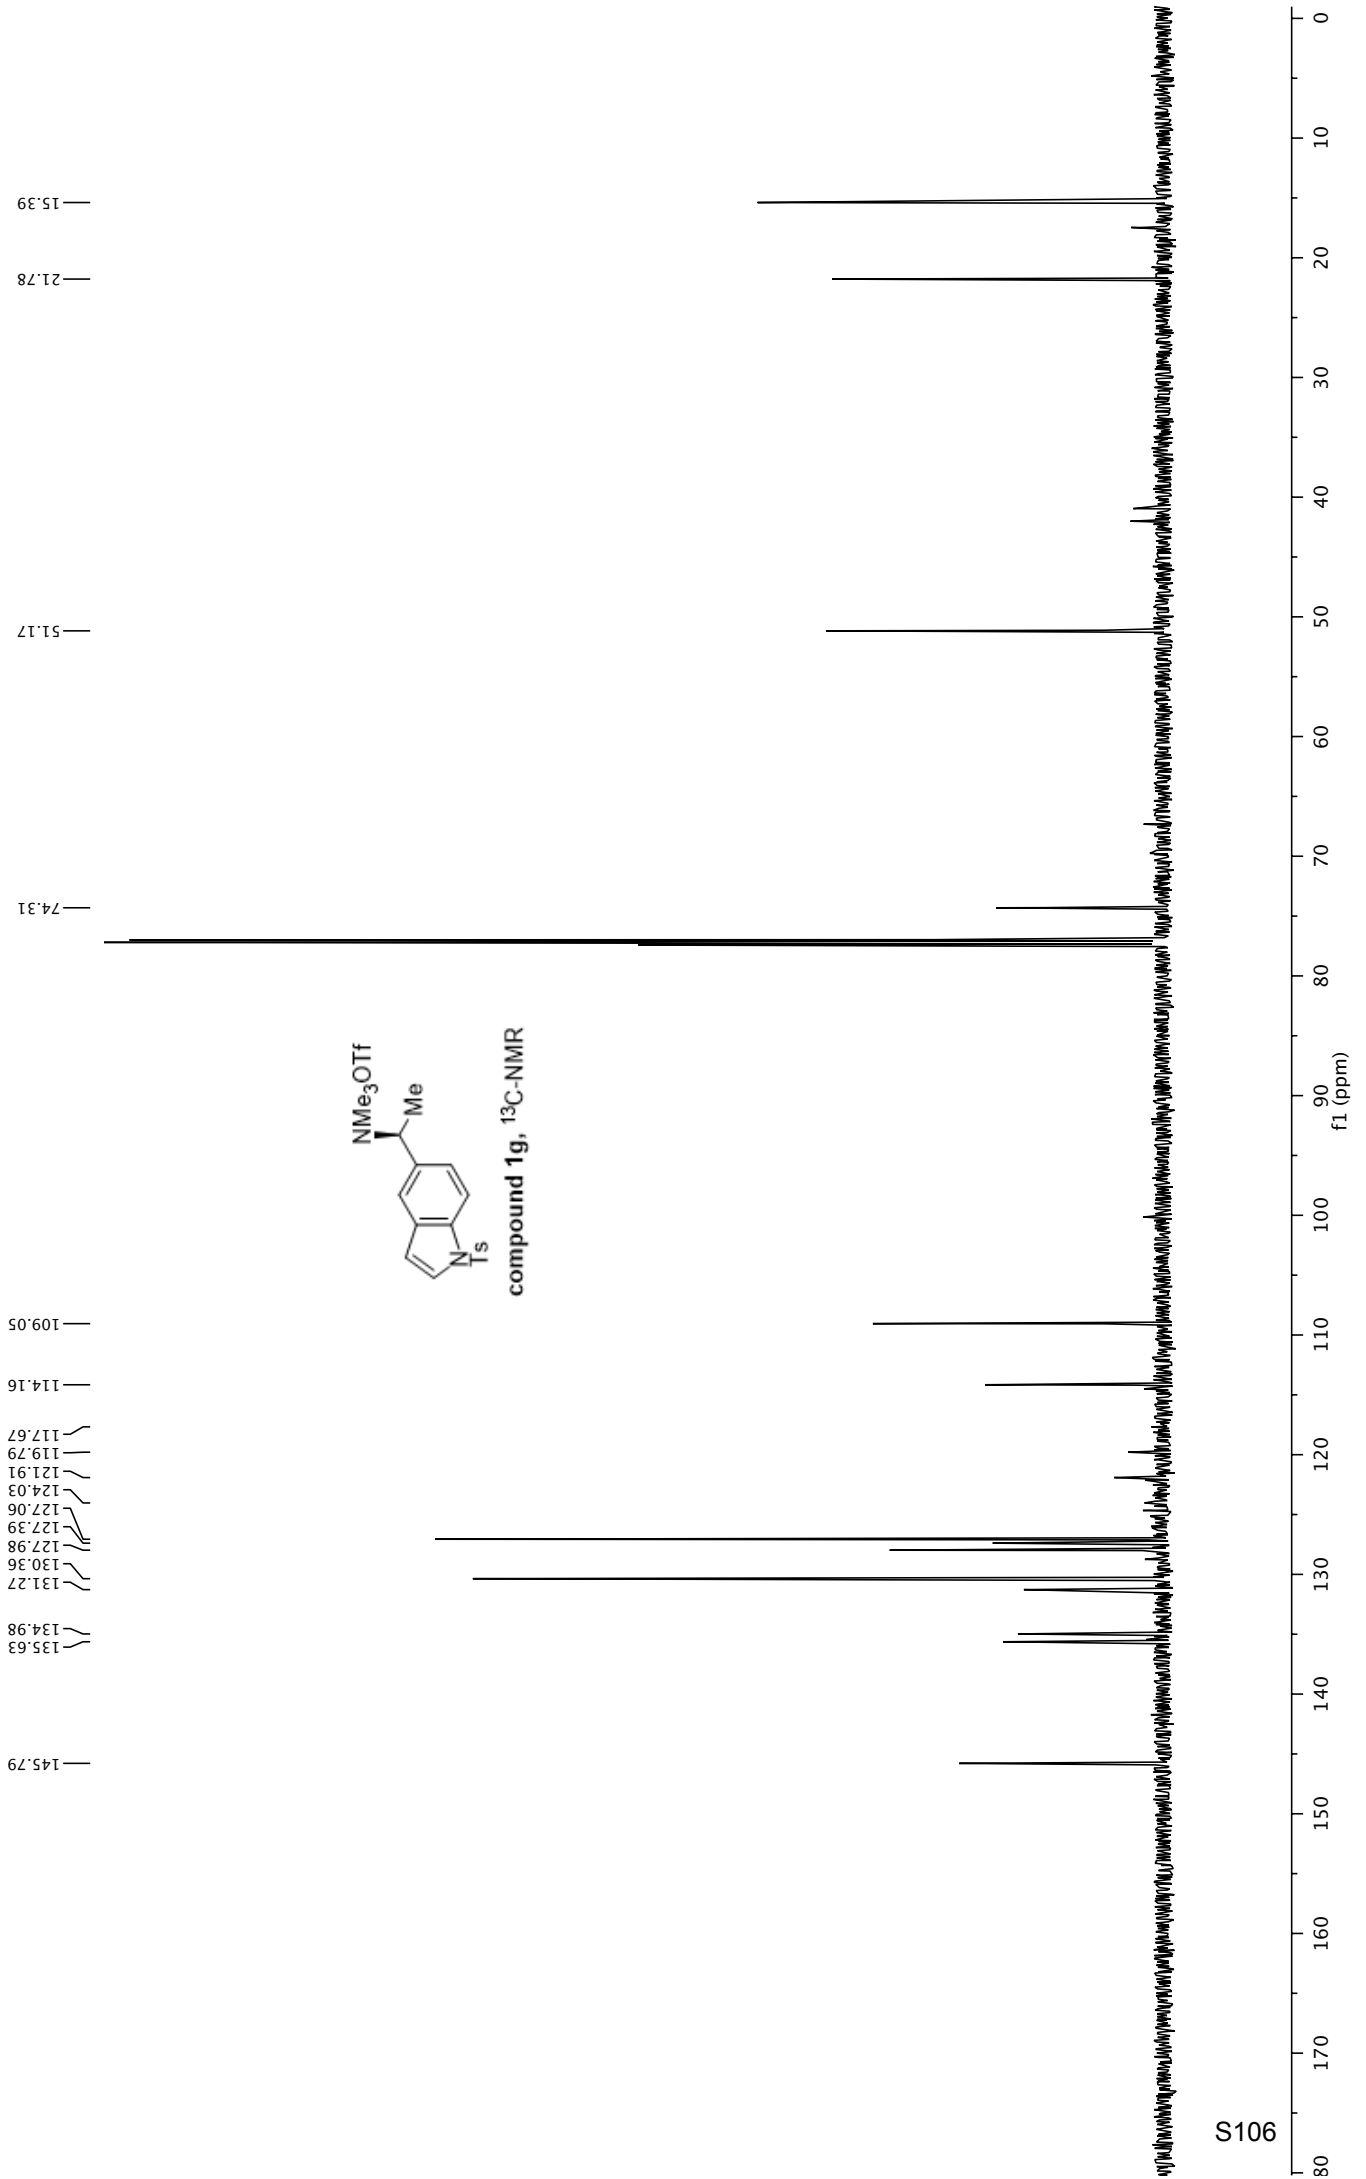

—78.36

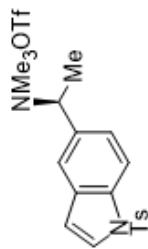

compound 1g, <sup>19</sup>F-NMR

S107



1.20  
1.27  
1.44  
2.12  
2.14  
2.16  
2.17  
2.18  
2.18  
2.19  
2.20  
2.21  
2.22  
2.23  
2.41

3.16

4.82

7.49  
7.54  
7.55  
7.56  
7.57  
7.58  
7.85  
7.86  
7.91  
7.94  
7.96  
7.97  
7.99  
8.11

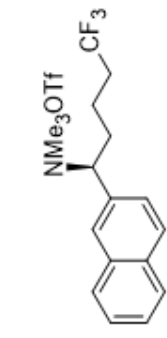

Compound 1h, <sup>1</sup>H-NMR

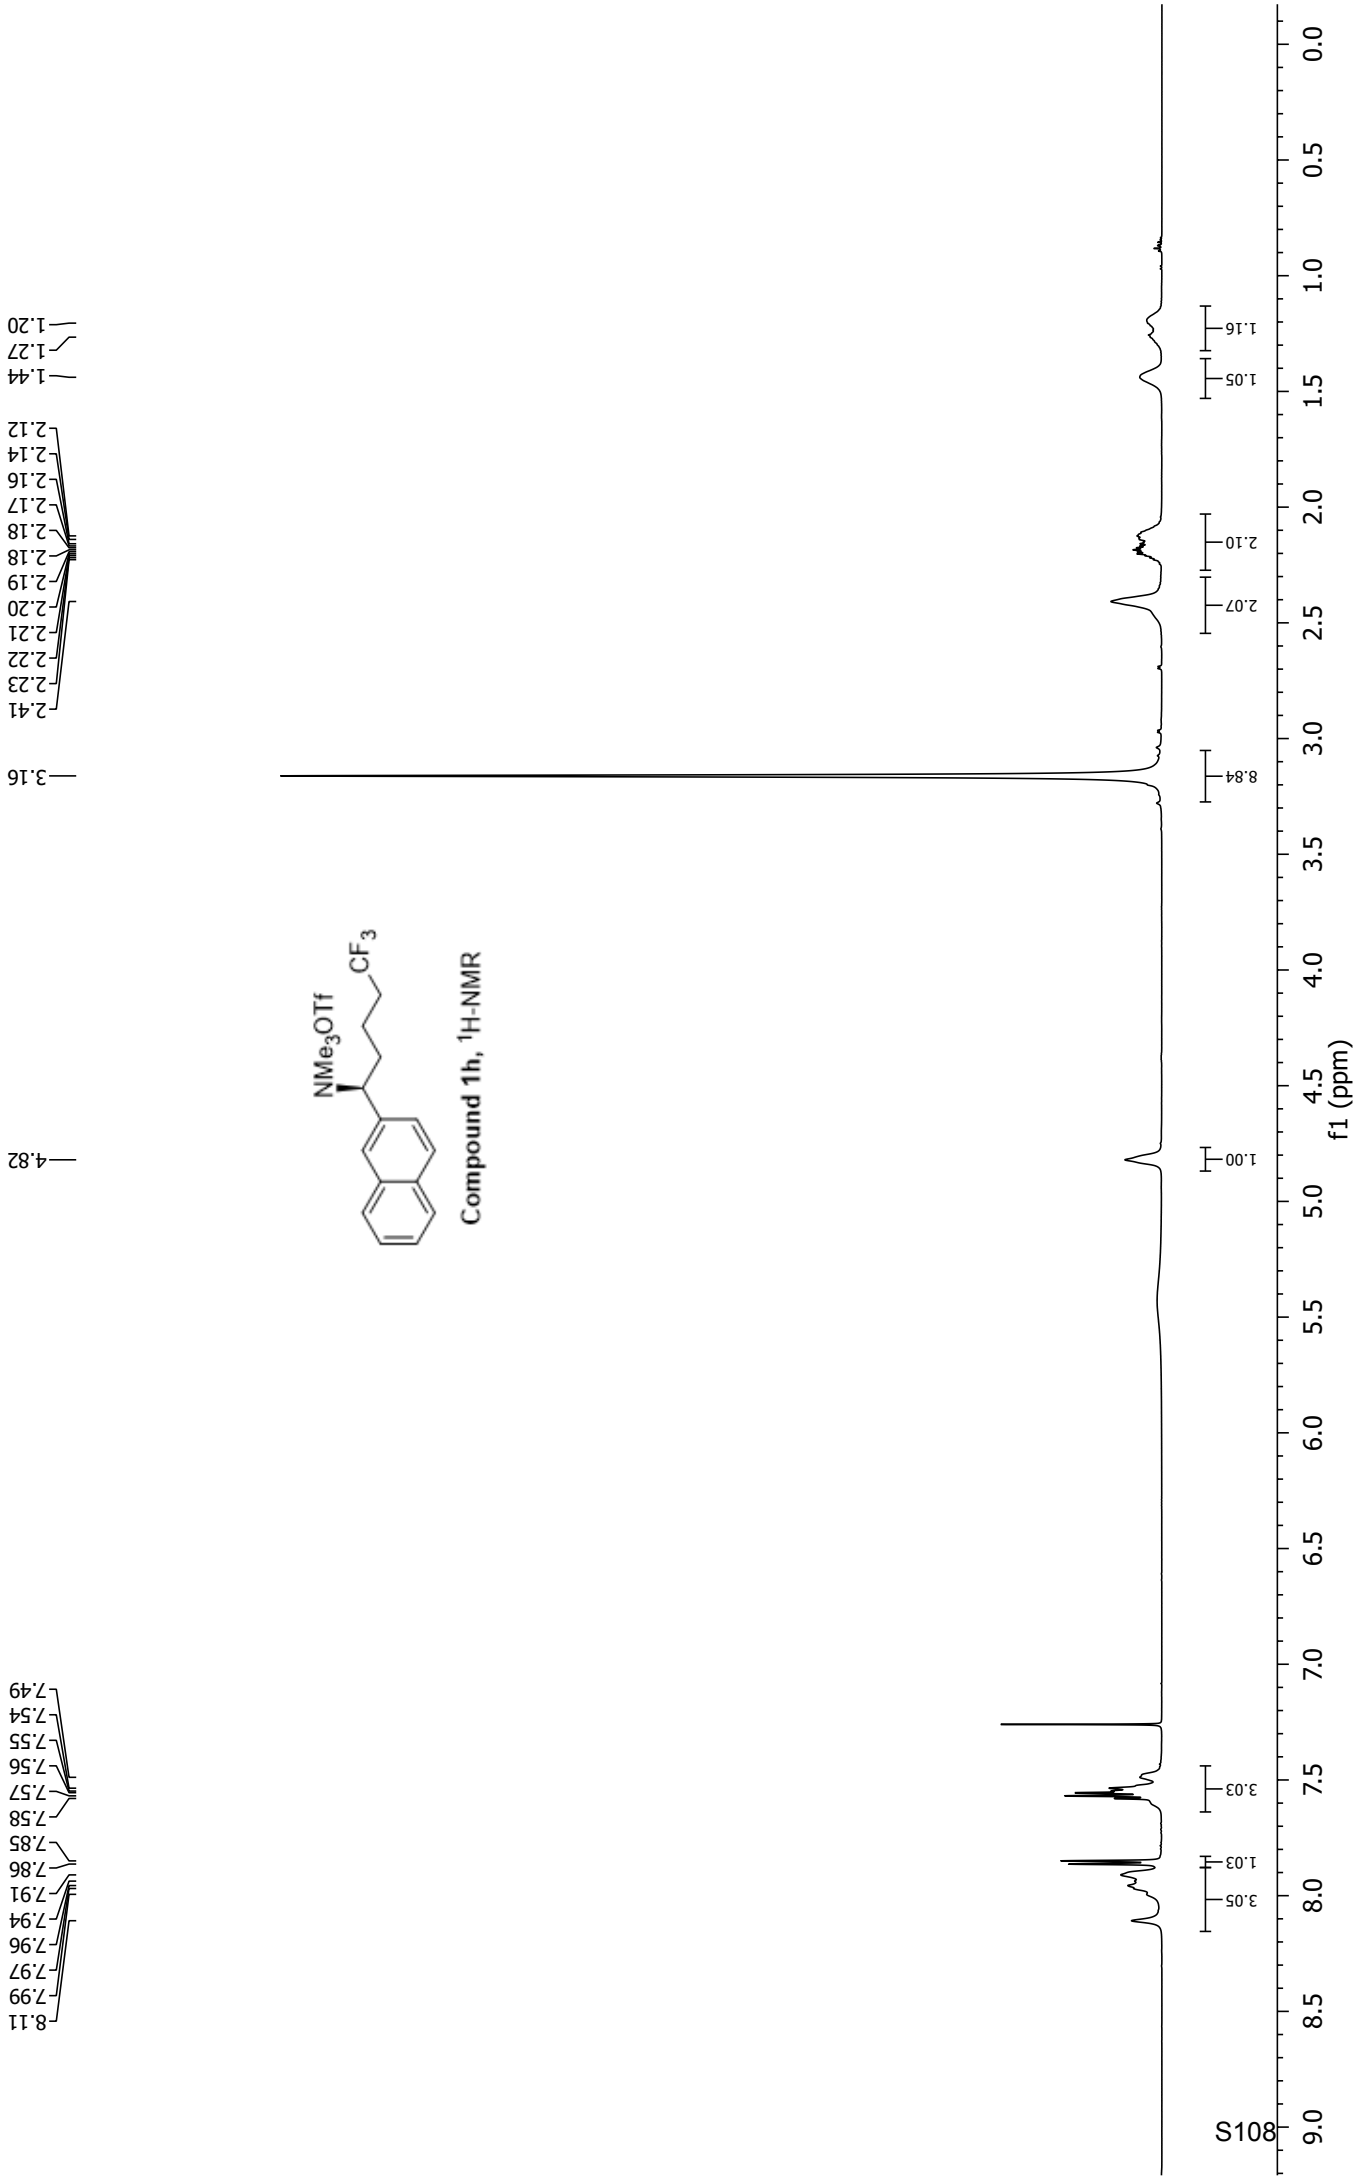

S108

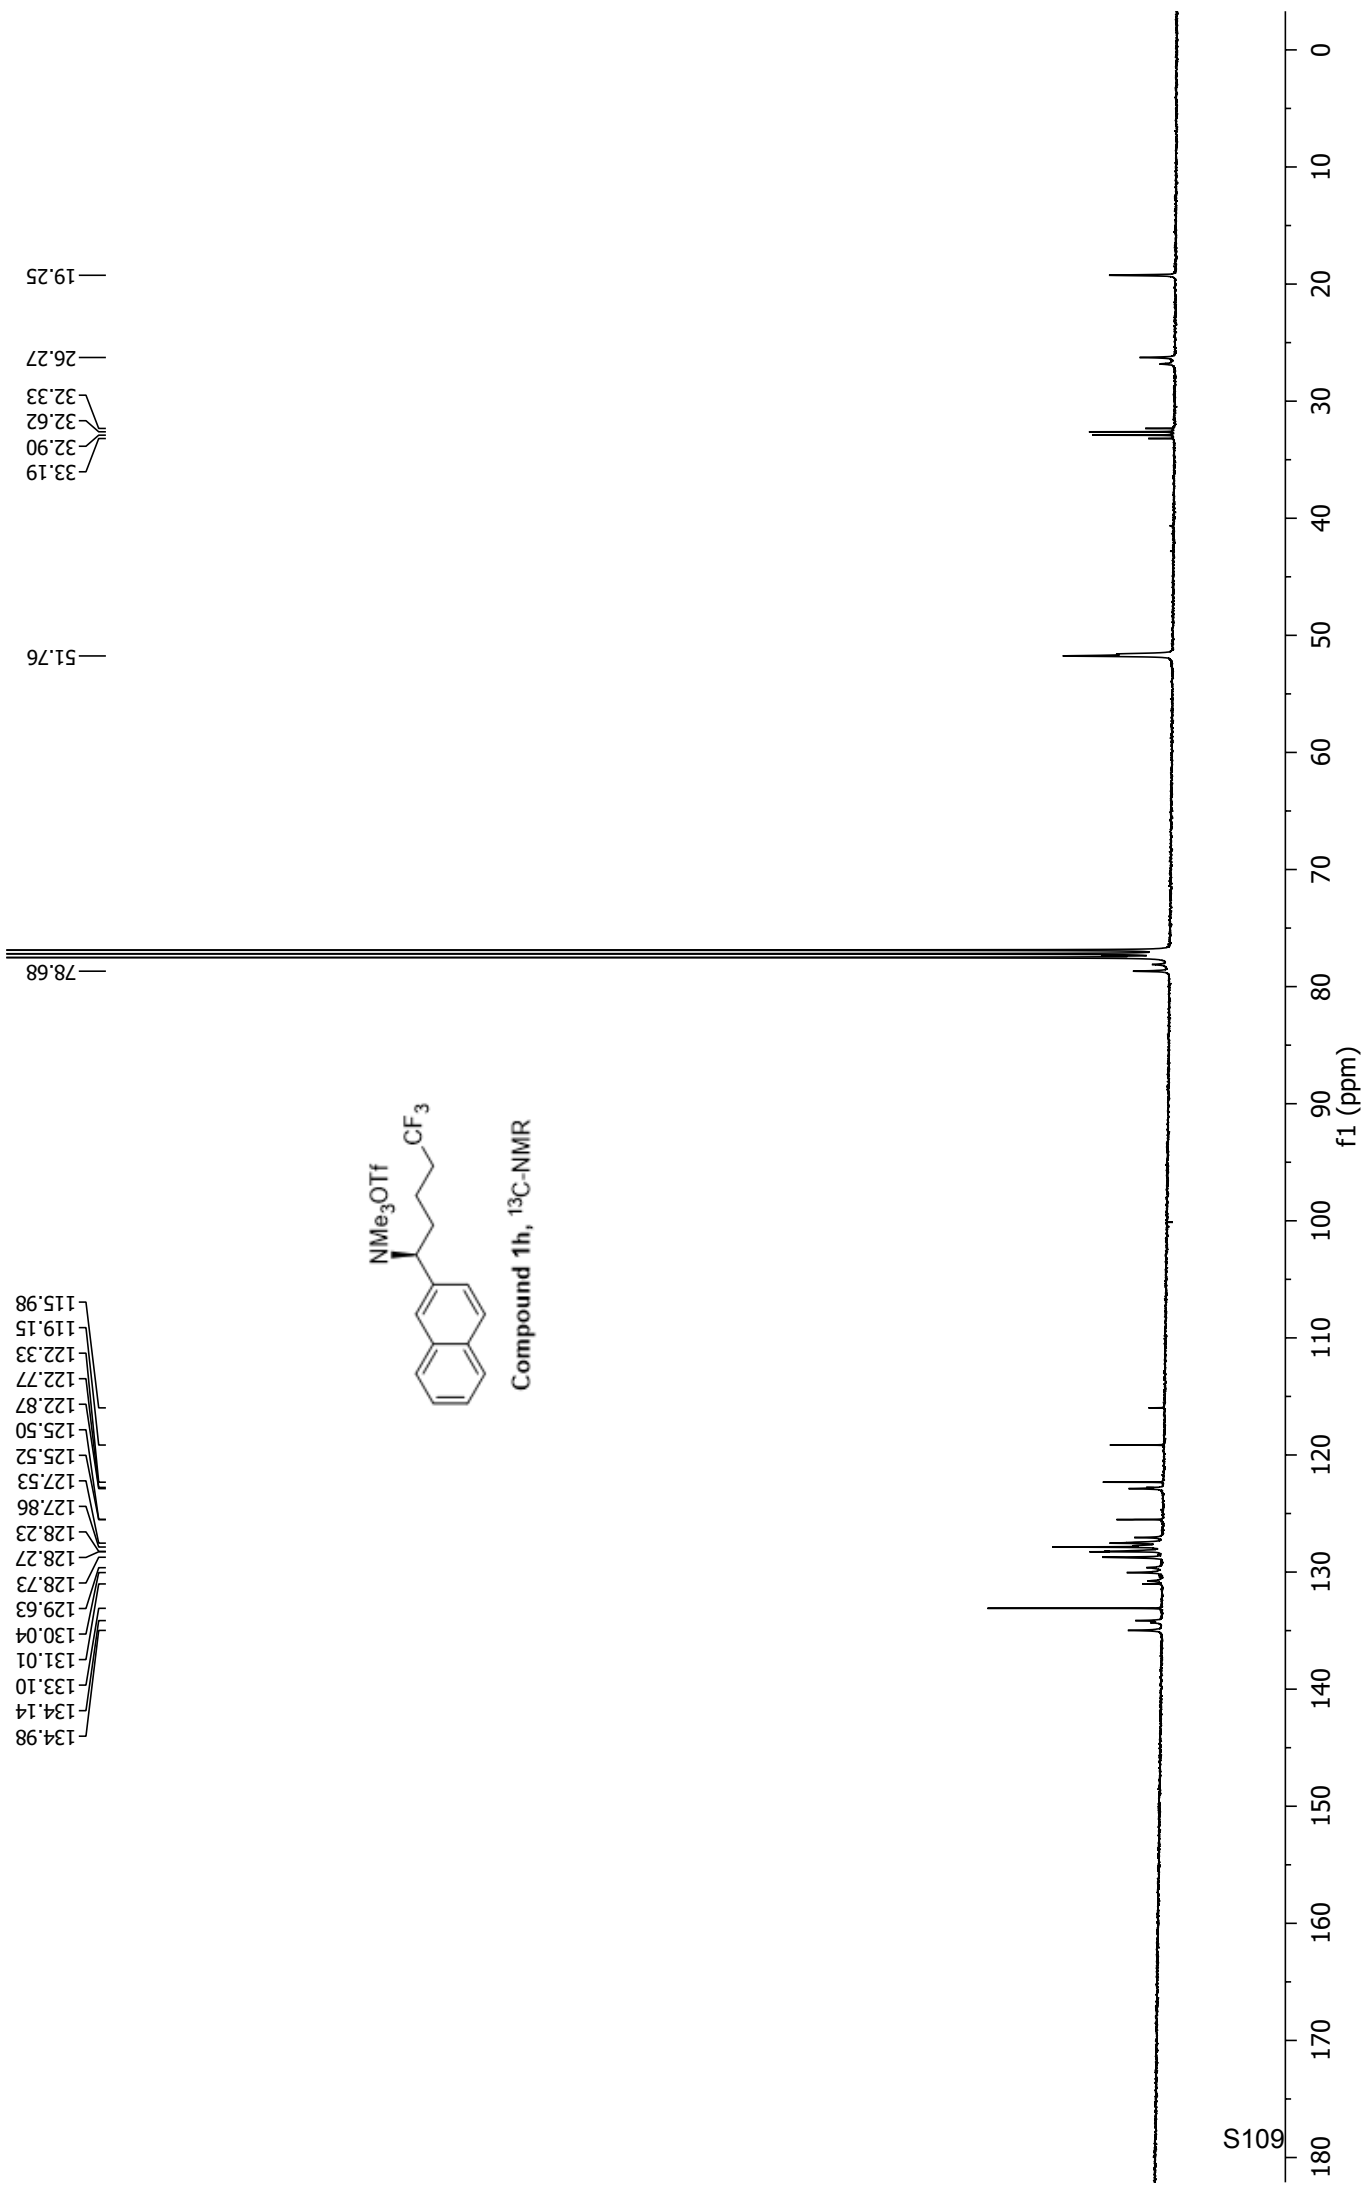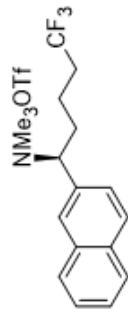

Compound 1h, <sup>13</sup>C-NMR

- 115.98
- 119.15
- 122.33
- 122.77
- 122.87
- 125.50
- 125.52
- 127.53
- 127.86
- 128.23
- 128.27
- 128.73
- 129.63
- 130.04
- 131.01
- 133.10
- 134.14
- 134.98

- 19.25
- 26.27
- 32.33
- 32.62
- 32.90
- 33.19
- 51.76
- 78.68

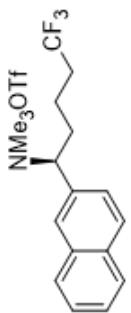

compound 1h, HMBC

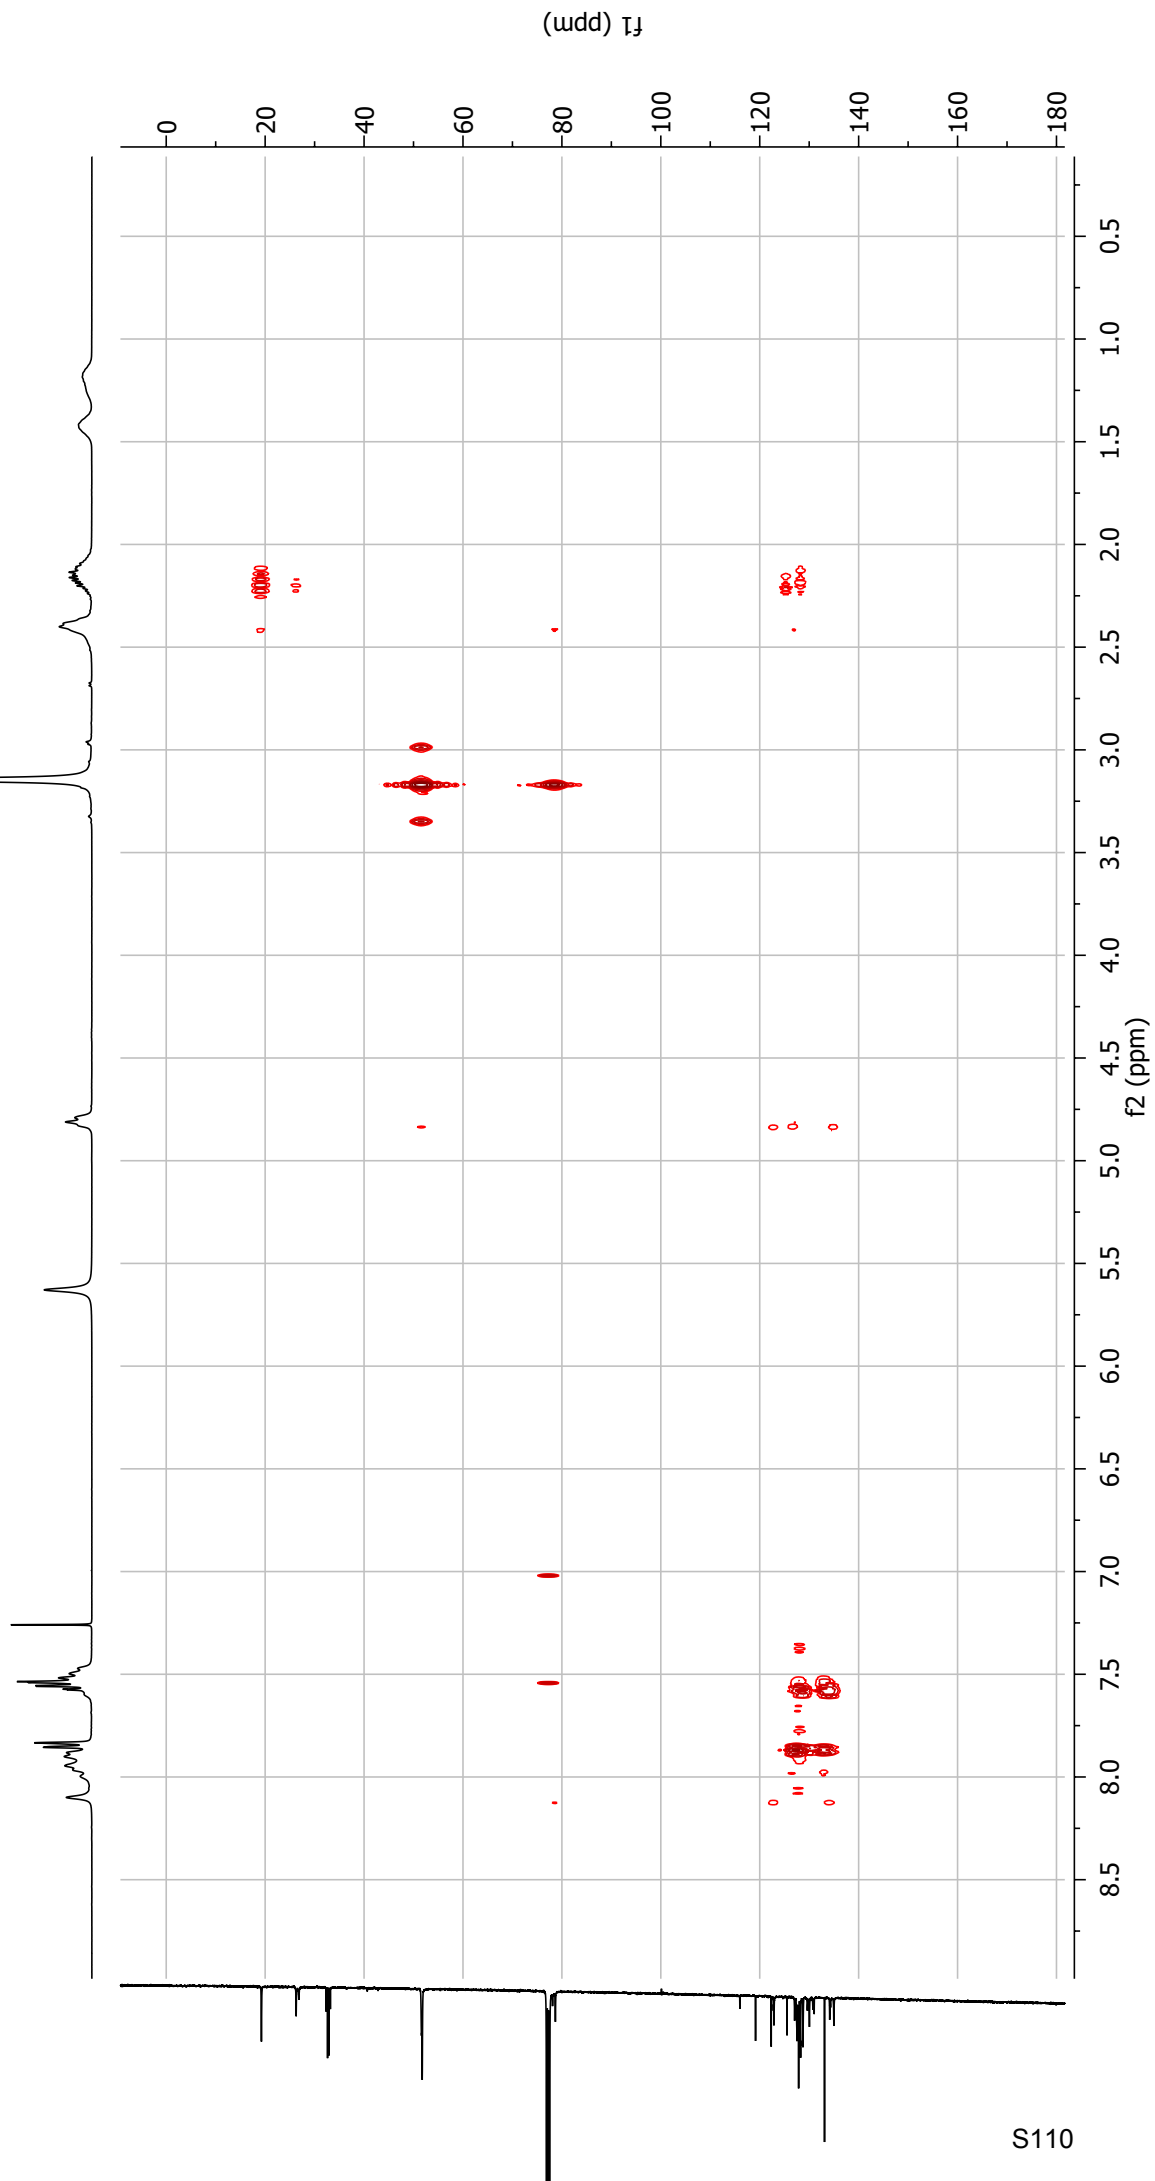

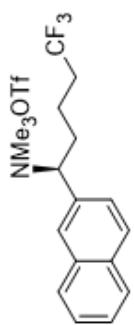

Compound 1h, HSQC

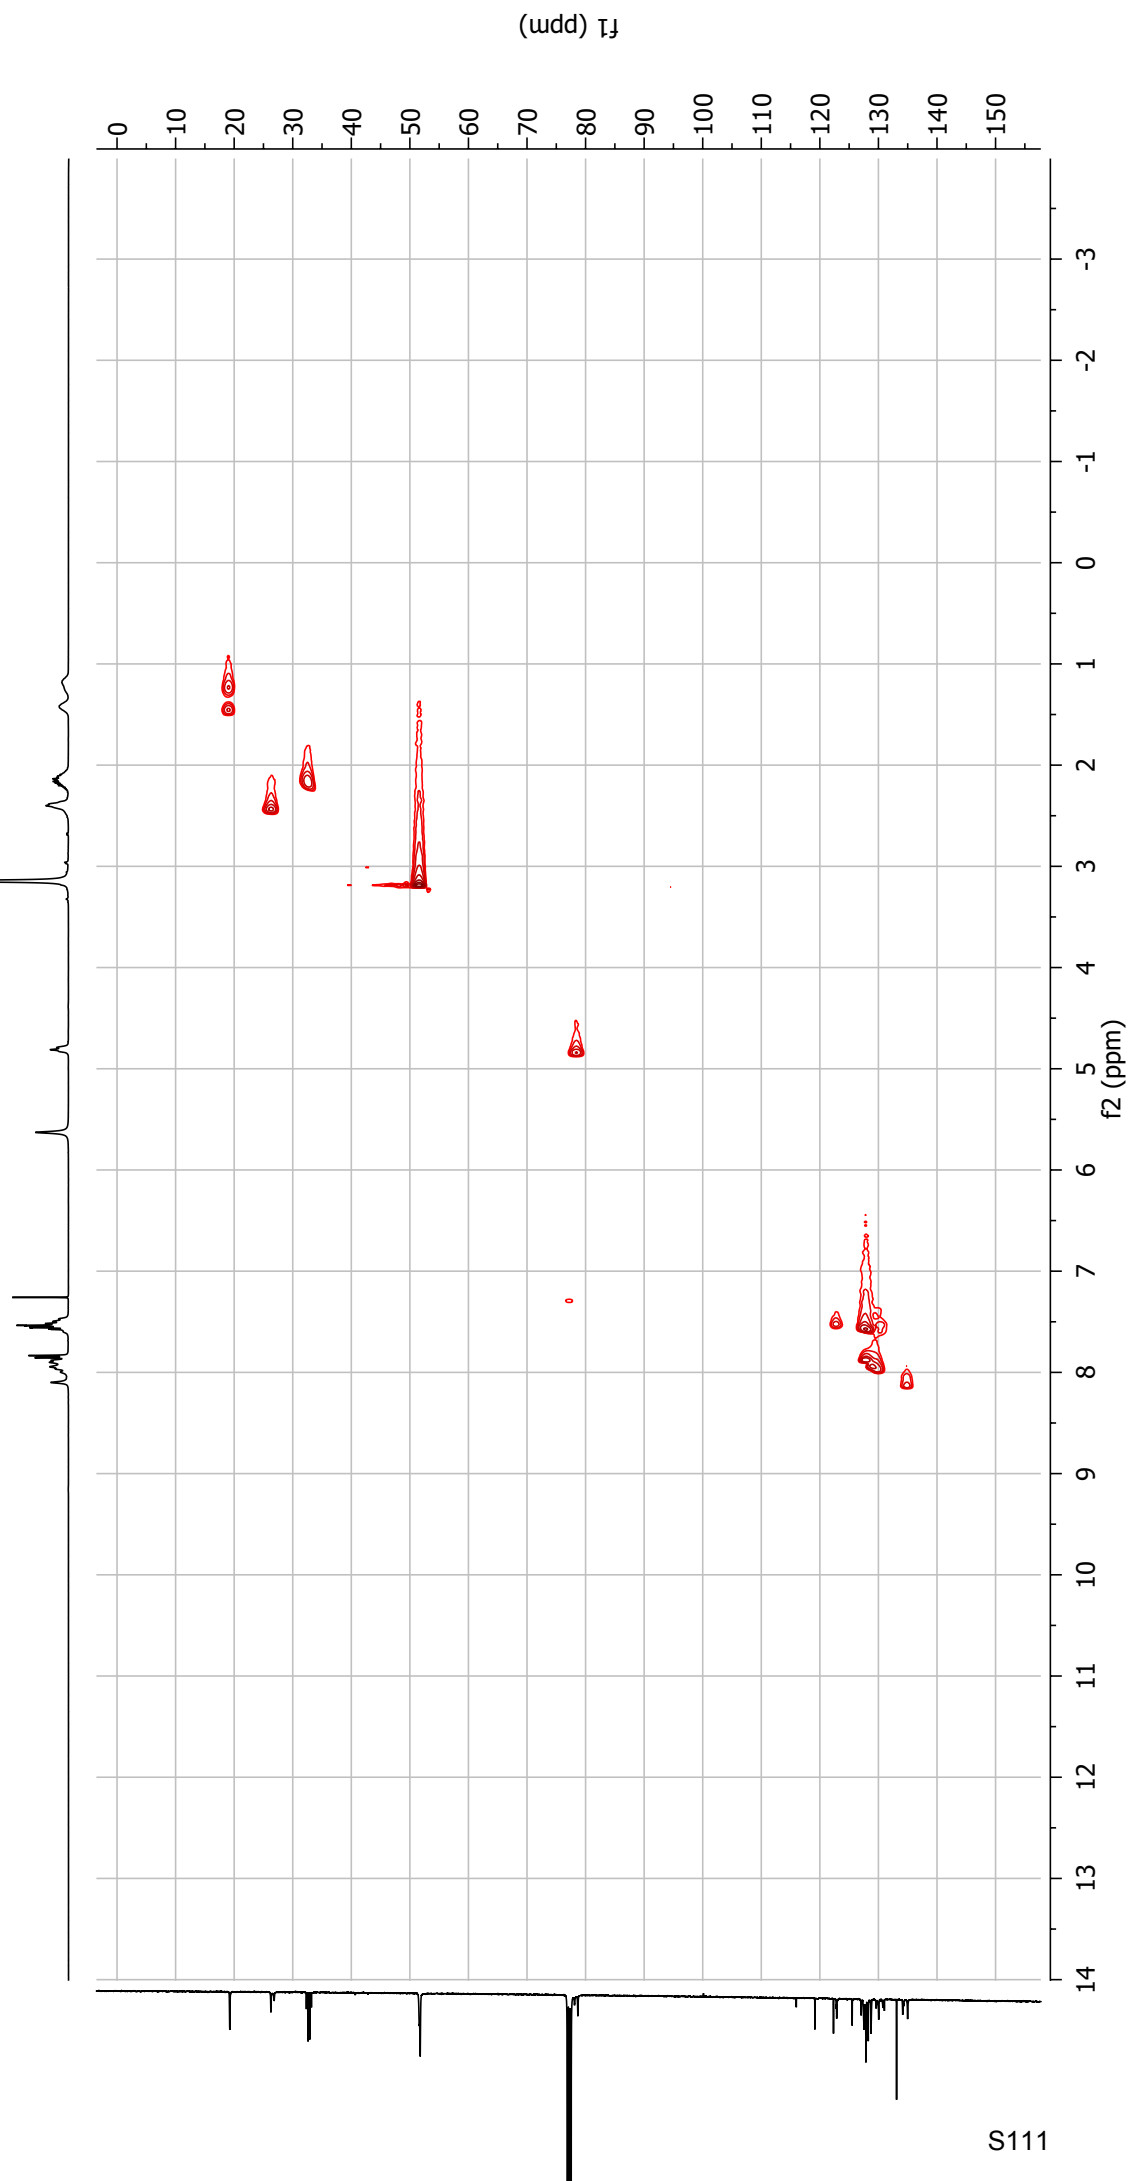

1.54  
1.43  
1.32

2.44  
2.37

3.17  
3.75  
3.76  
3.77  
3.78  
3.79  
3.80  
3.88  
3.90  
3.91  
3.92  
3.93  
3.95  
4.81  
4.81  
4.82  
4.85  
4.87

7.48  
7.53  
7.54  
7.56  
7.57  
7.58  
7.85  
7.86  
7.92  
7.93  
8.10

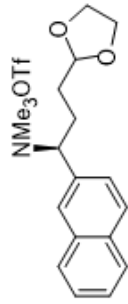

Compound 1i,  $^1\text{H-NMR}$

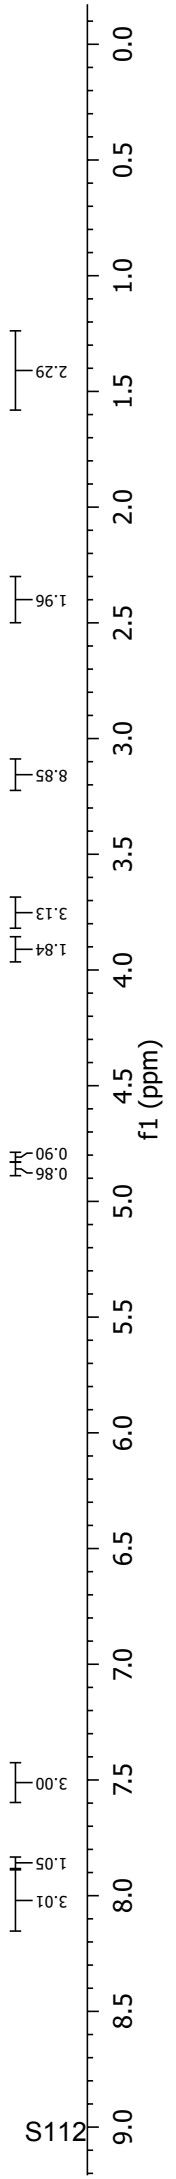

S112



8.06  
7.94  
7.93  
7.87  
7.86  
7.85  
7.59  
7.59  
7.57  
7.57  
7.56  
7.56  
7.56  
7.55  
7.54  
7.54  
7.54  
7.53  
7.52  
4.94  
4.92  
4.88  
4.87  
4.85  
4.84  
4.83  
4.82  
4.81  
3.92  
3.91  
3.91  
3.91  
3.90  
3.79  
3.78  
3.78  
3.77  
3.76  
3.18  
2.48  
2.47  
2.46  
2.45  
2.44  
2.44  
2.43  
2.40  
2.38  
1.59  
1.58  
1.57  
1.56  
1.55  
1.54  
1.53  
1.52  
1.51  
1.50  
1.43  
1.38  
1.35  
1.33  
1.31

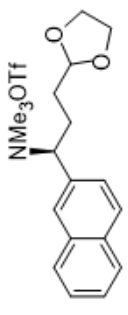

Compound 1i, <sup>1</sup>H-NMR 50 °C

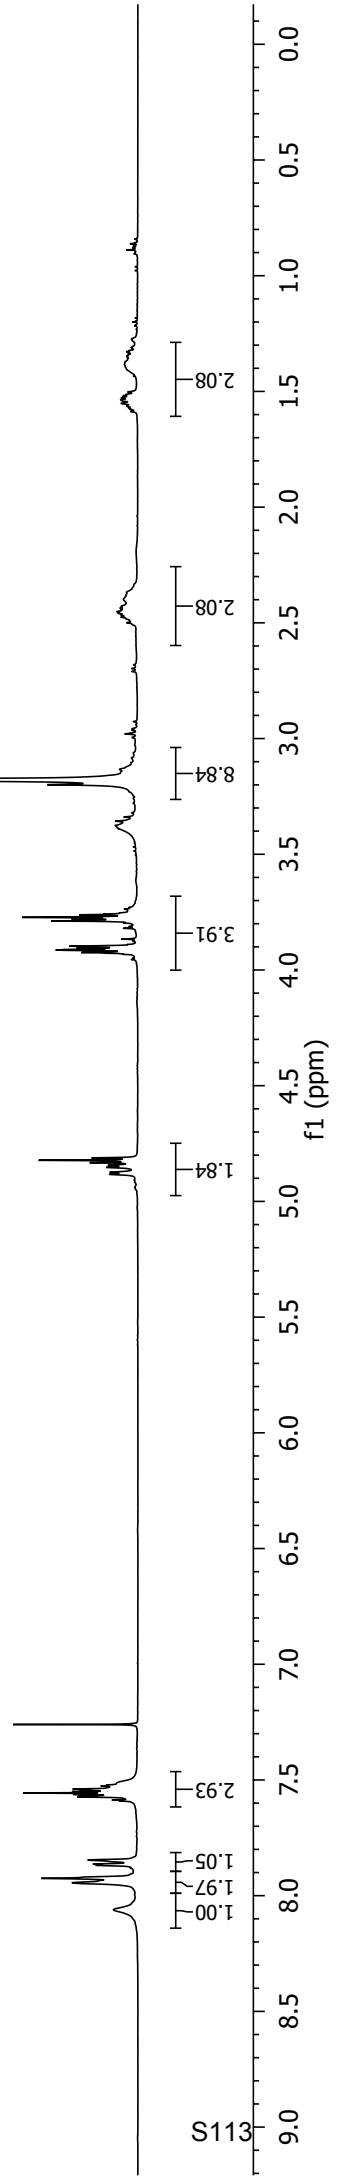

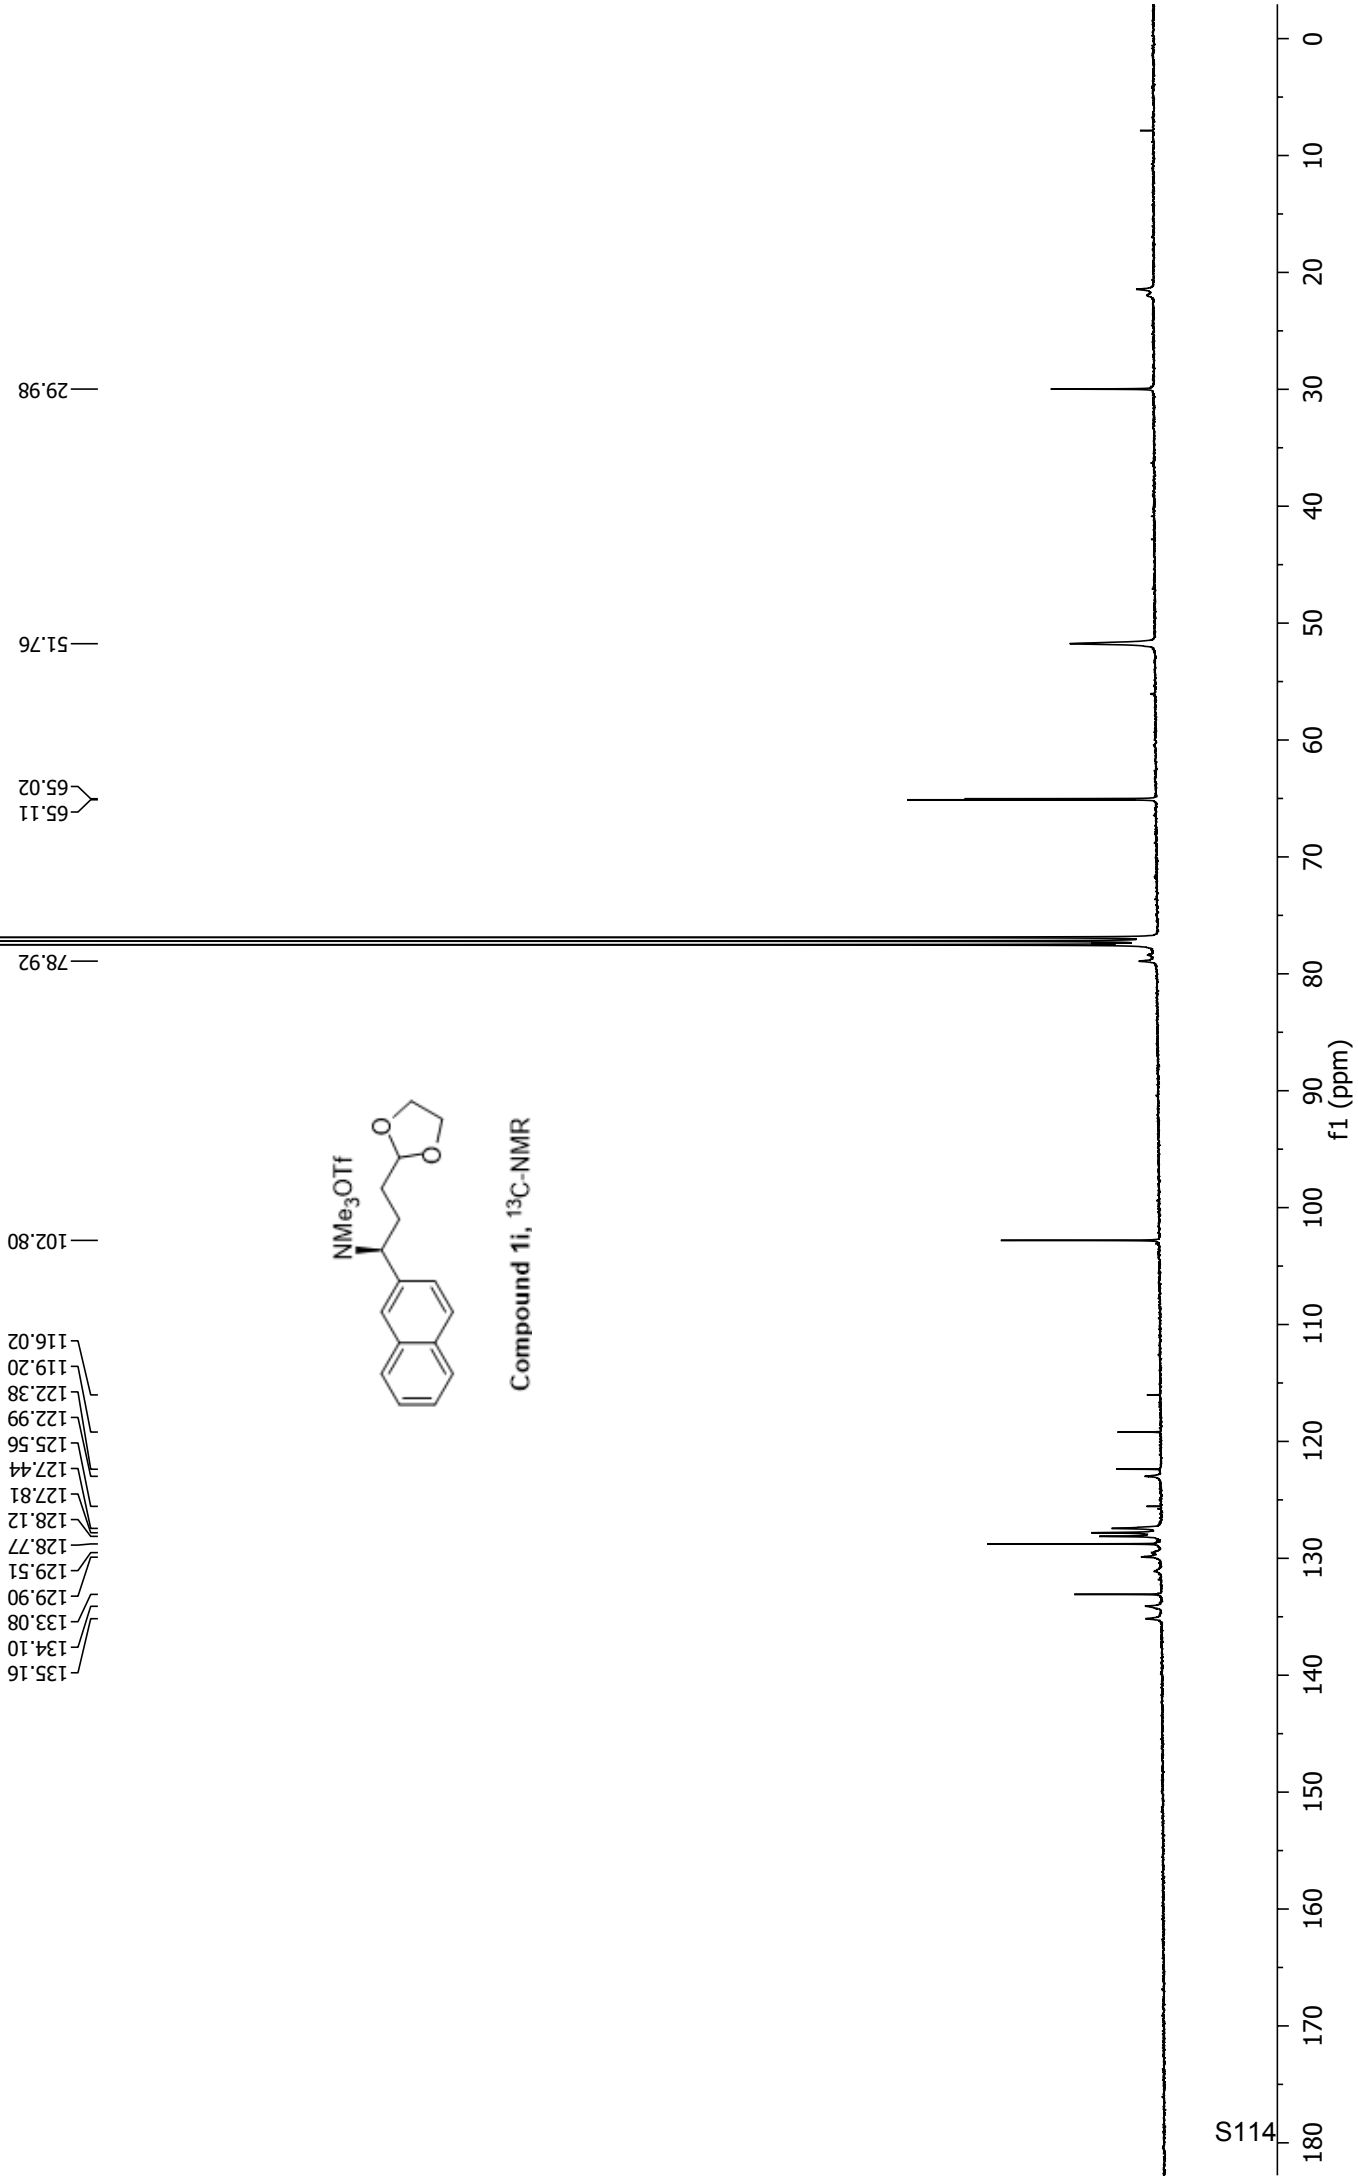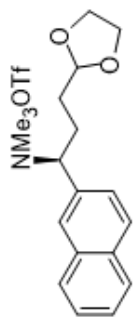

Compound 1i, <sup>13</sup>C-NMR

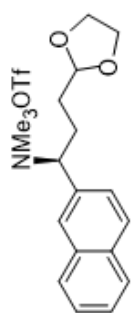

Compound 1i, HMBC

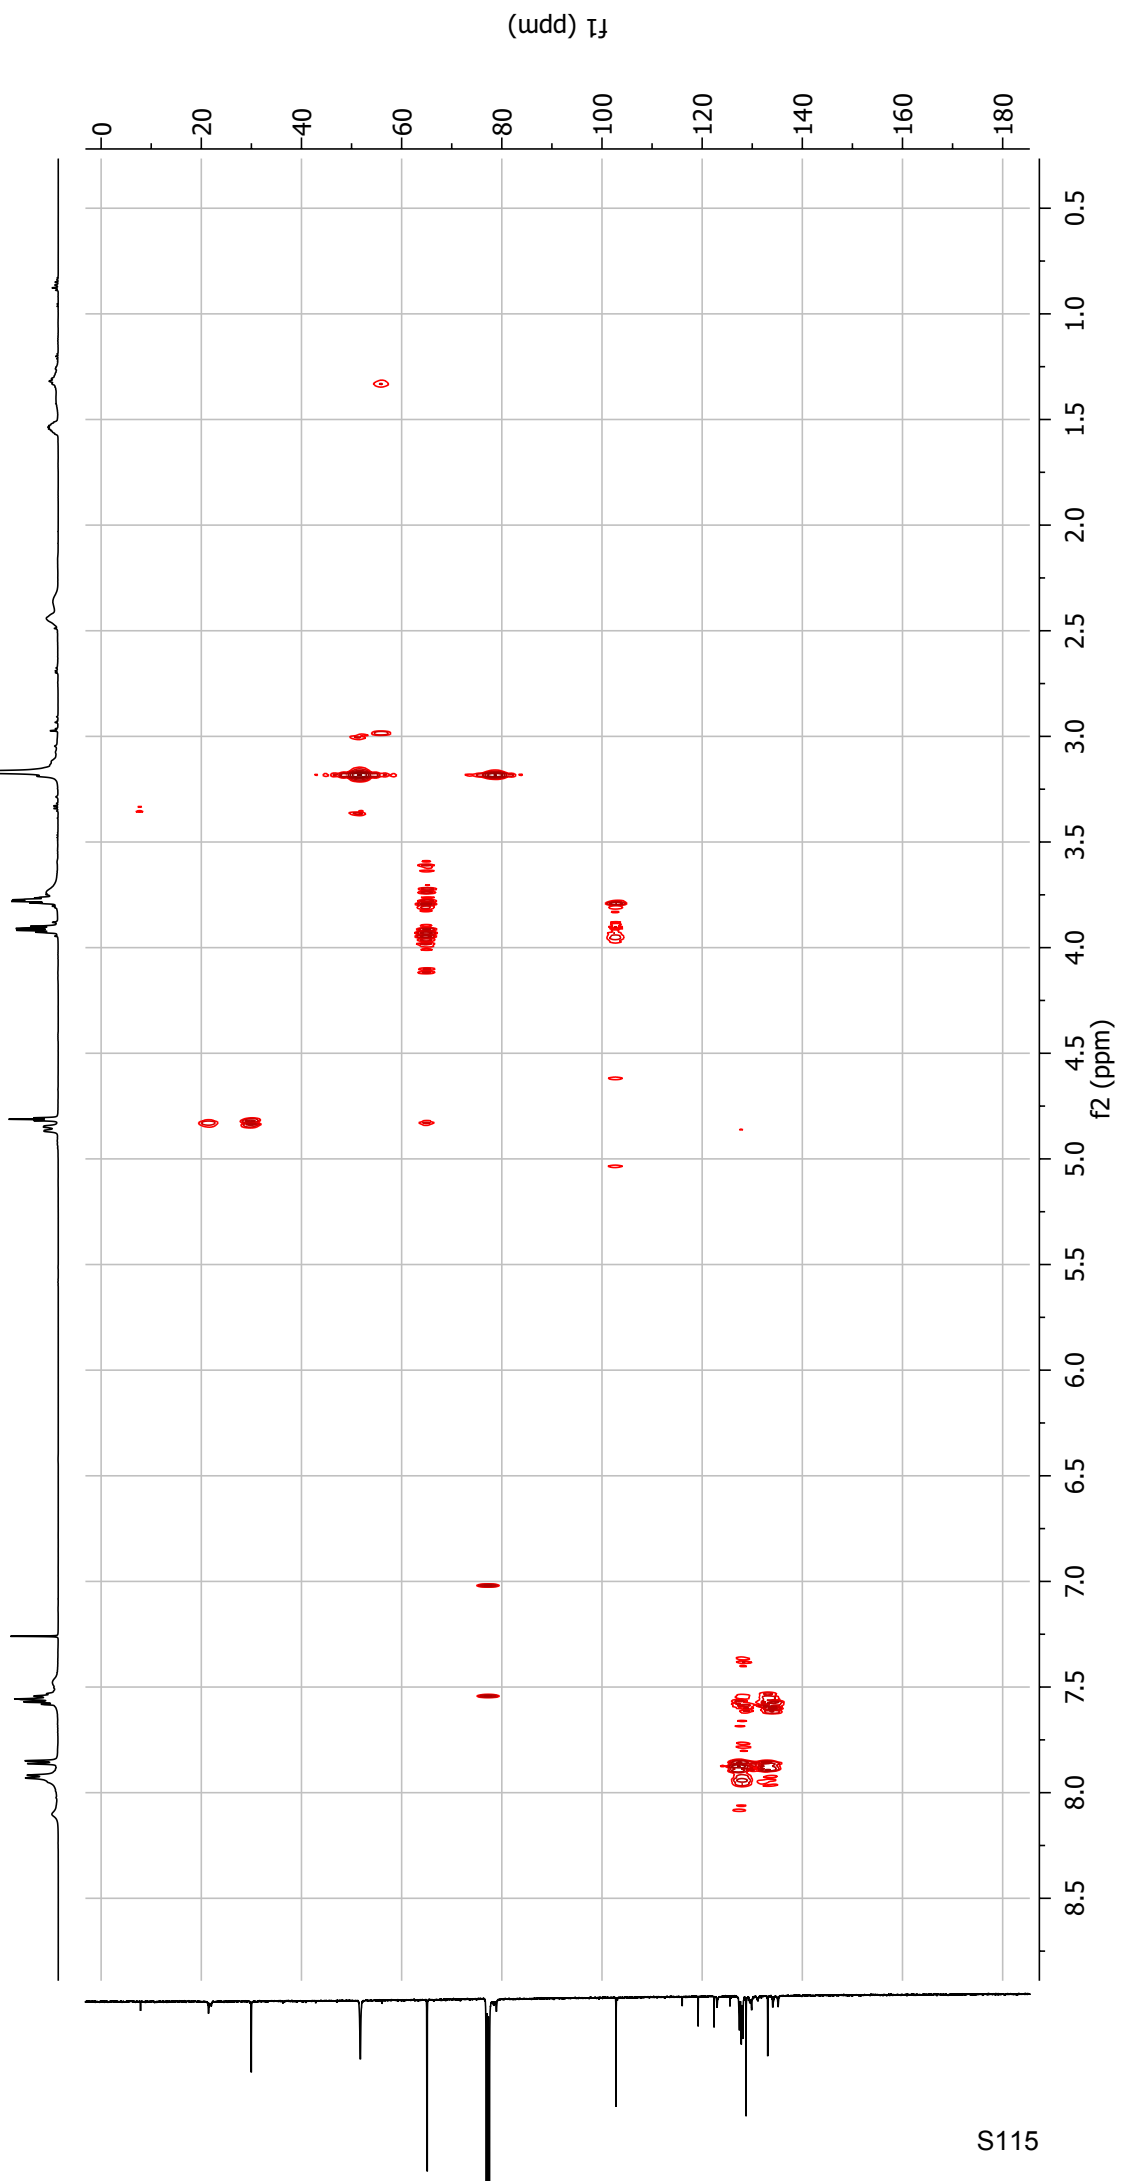

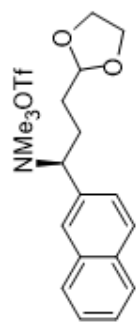

Compound 1i, HSQC

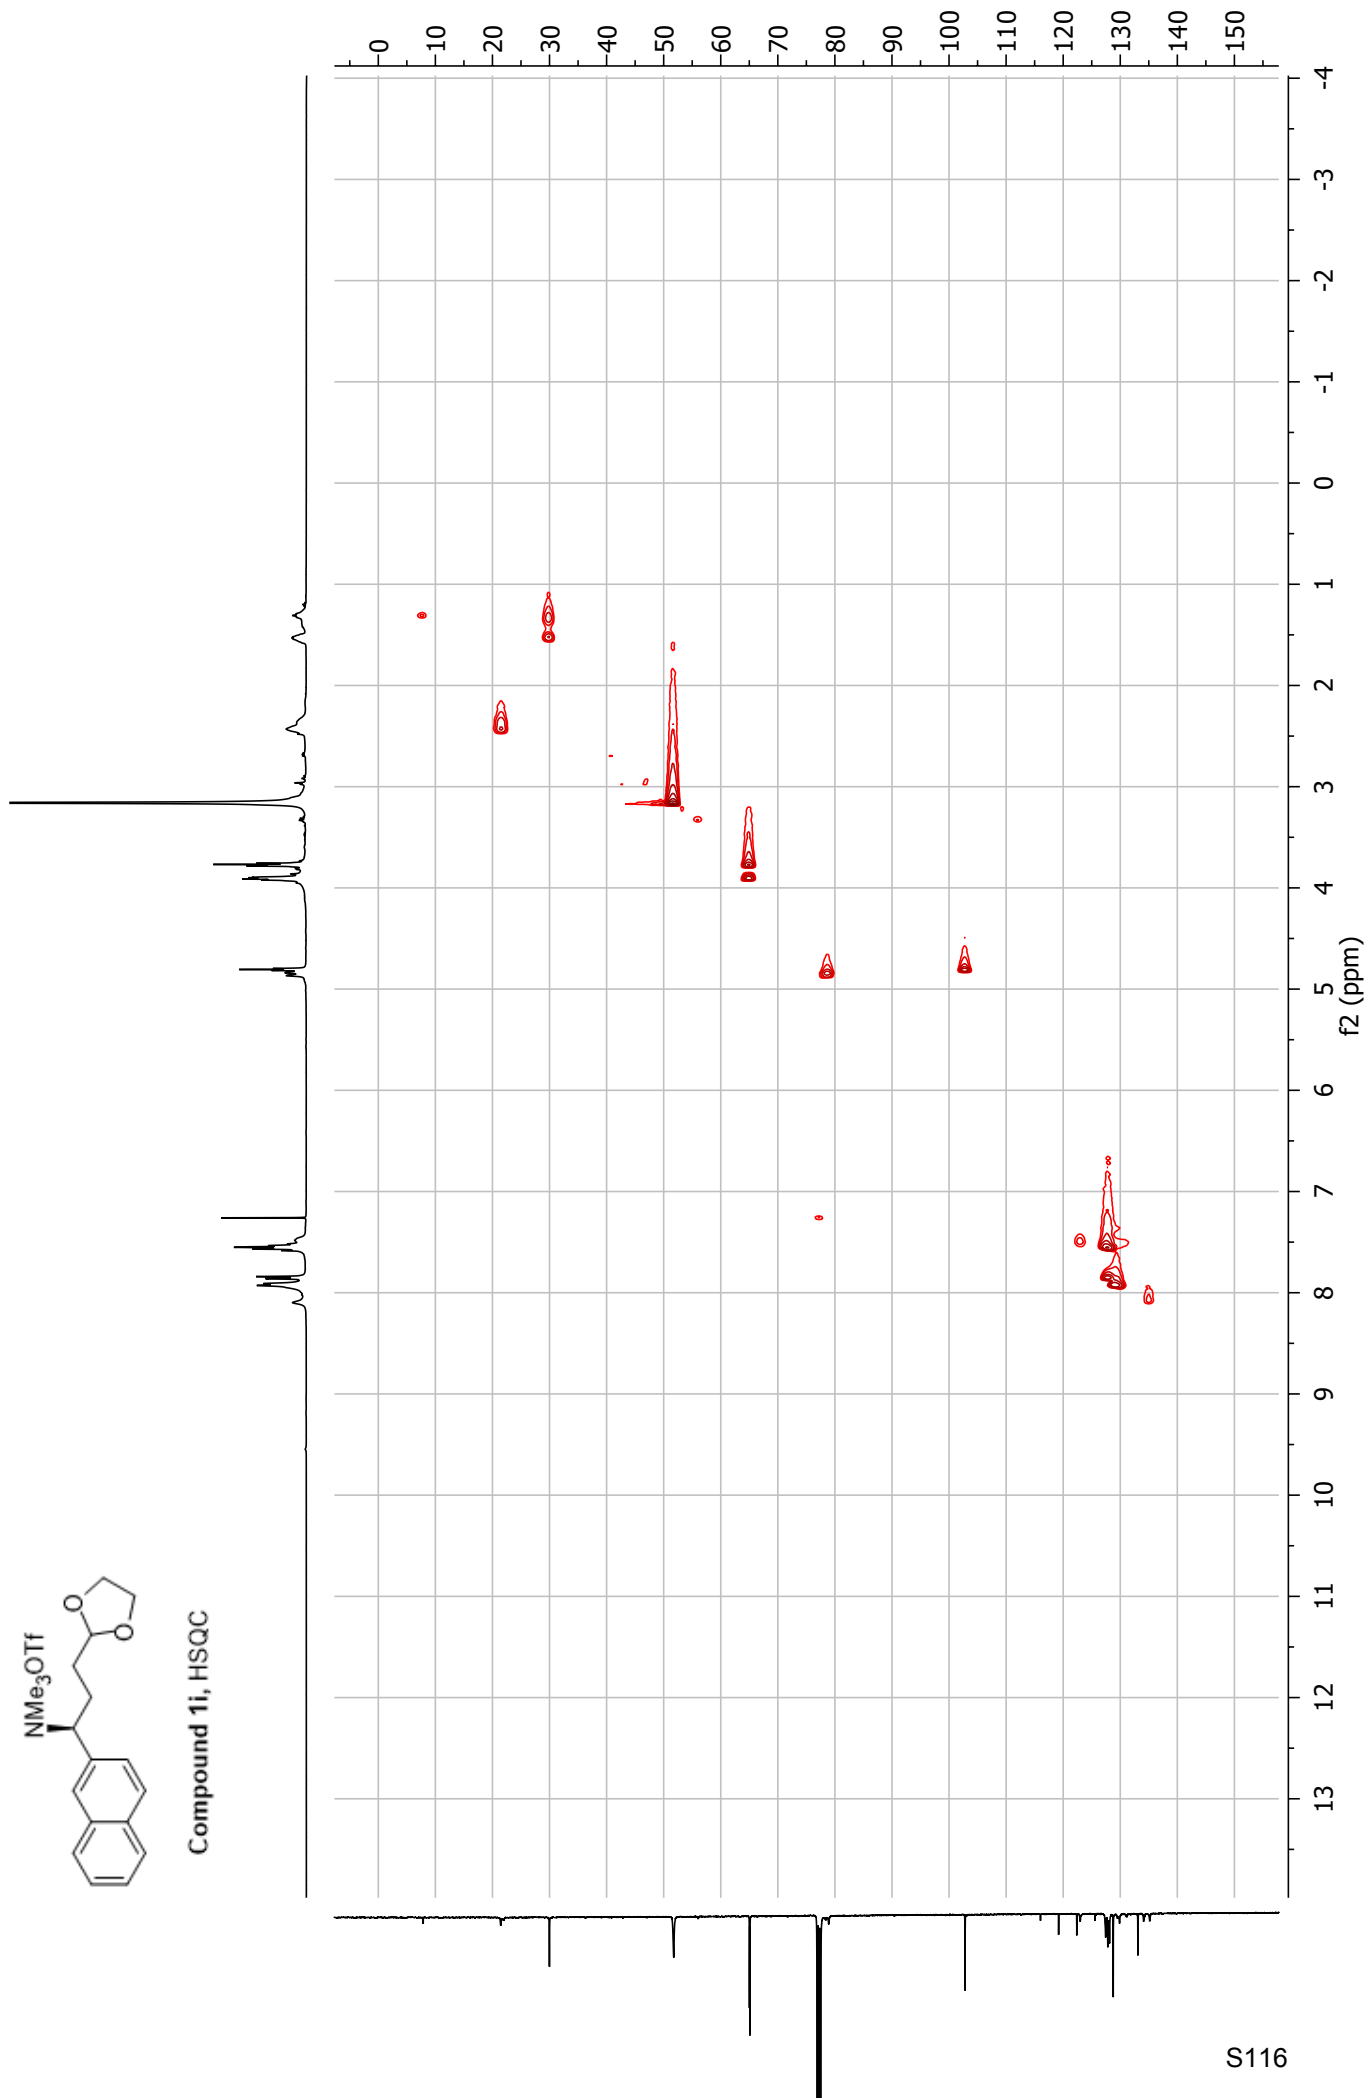

2.32  
2.40  
2.42  
2.43  
2.44  
2.45  
2.59  
2.60

3.12

4.71  
4.72

7.05  
7.06  
7.13  
7.14  
7.15  
7.21  
7.22  
7.23  
7.58  
7.59  
7.61

7.89  
7.91  
7.93  
7.96  
7.99  
8.00  
8.05

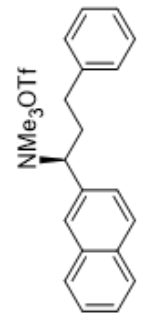

Compound 1j, <sup>1</sup>H-NMR

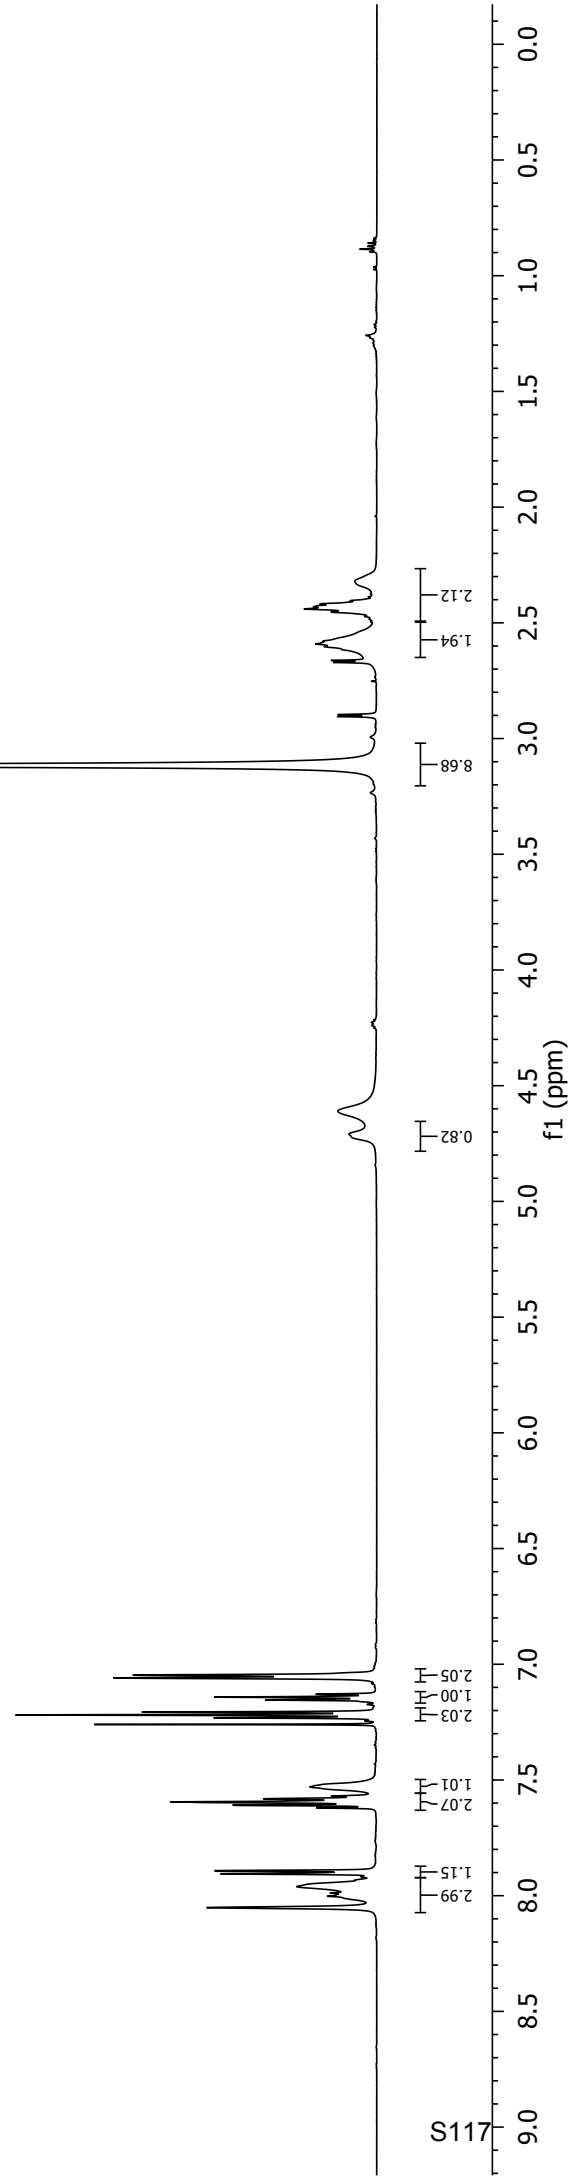

S117



— 29.33  
— 32.26

— 51.75

— 78.91

— 115.98  
— 119.16  
— 122.33  
— 123.01  
— 125.51  
— 126.69  
— 127.33  
— 127.51  
— 127.85  
— 128.17  
— 128.41  
— 128.79  
— 129.51  
— 130.01  
— 133.11  
— 134.13  
— 135.08  
— 139.59

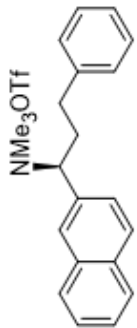

Compound 1j, <sup>13</sup>C-NMR

S119

f1 (ppm)

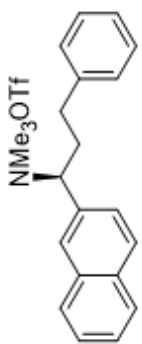

Compound 1j, HMBC

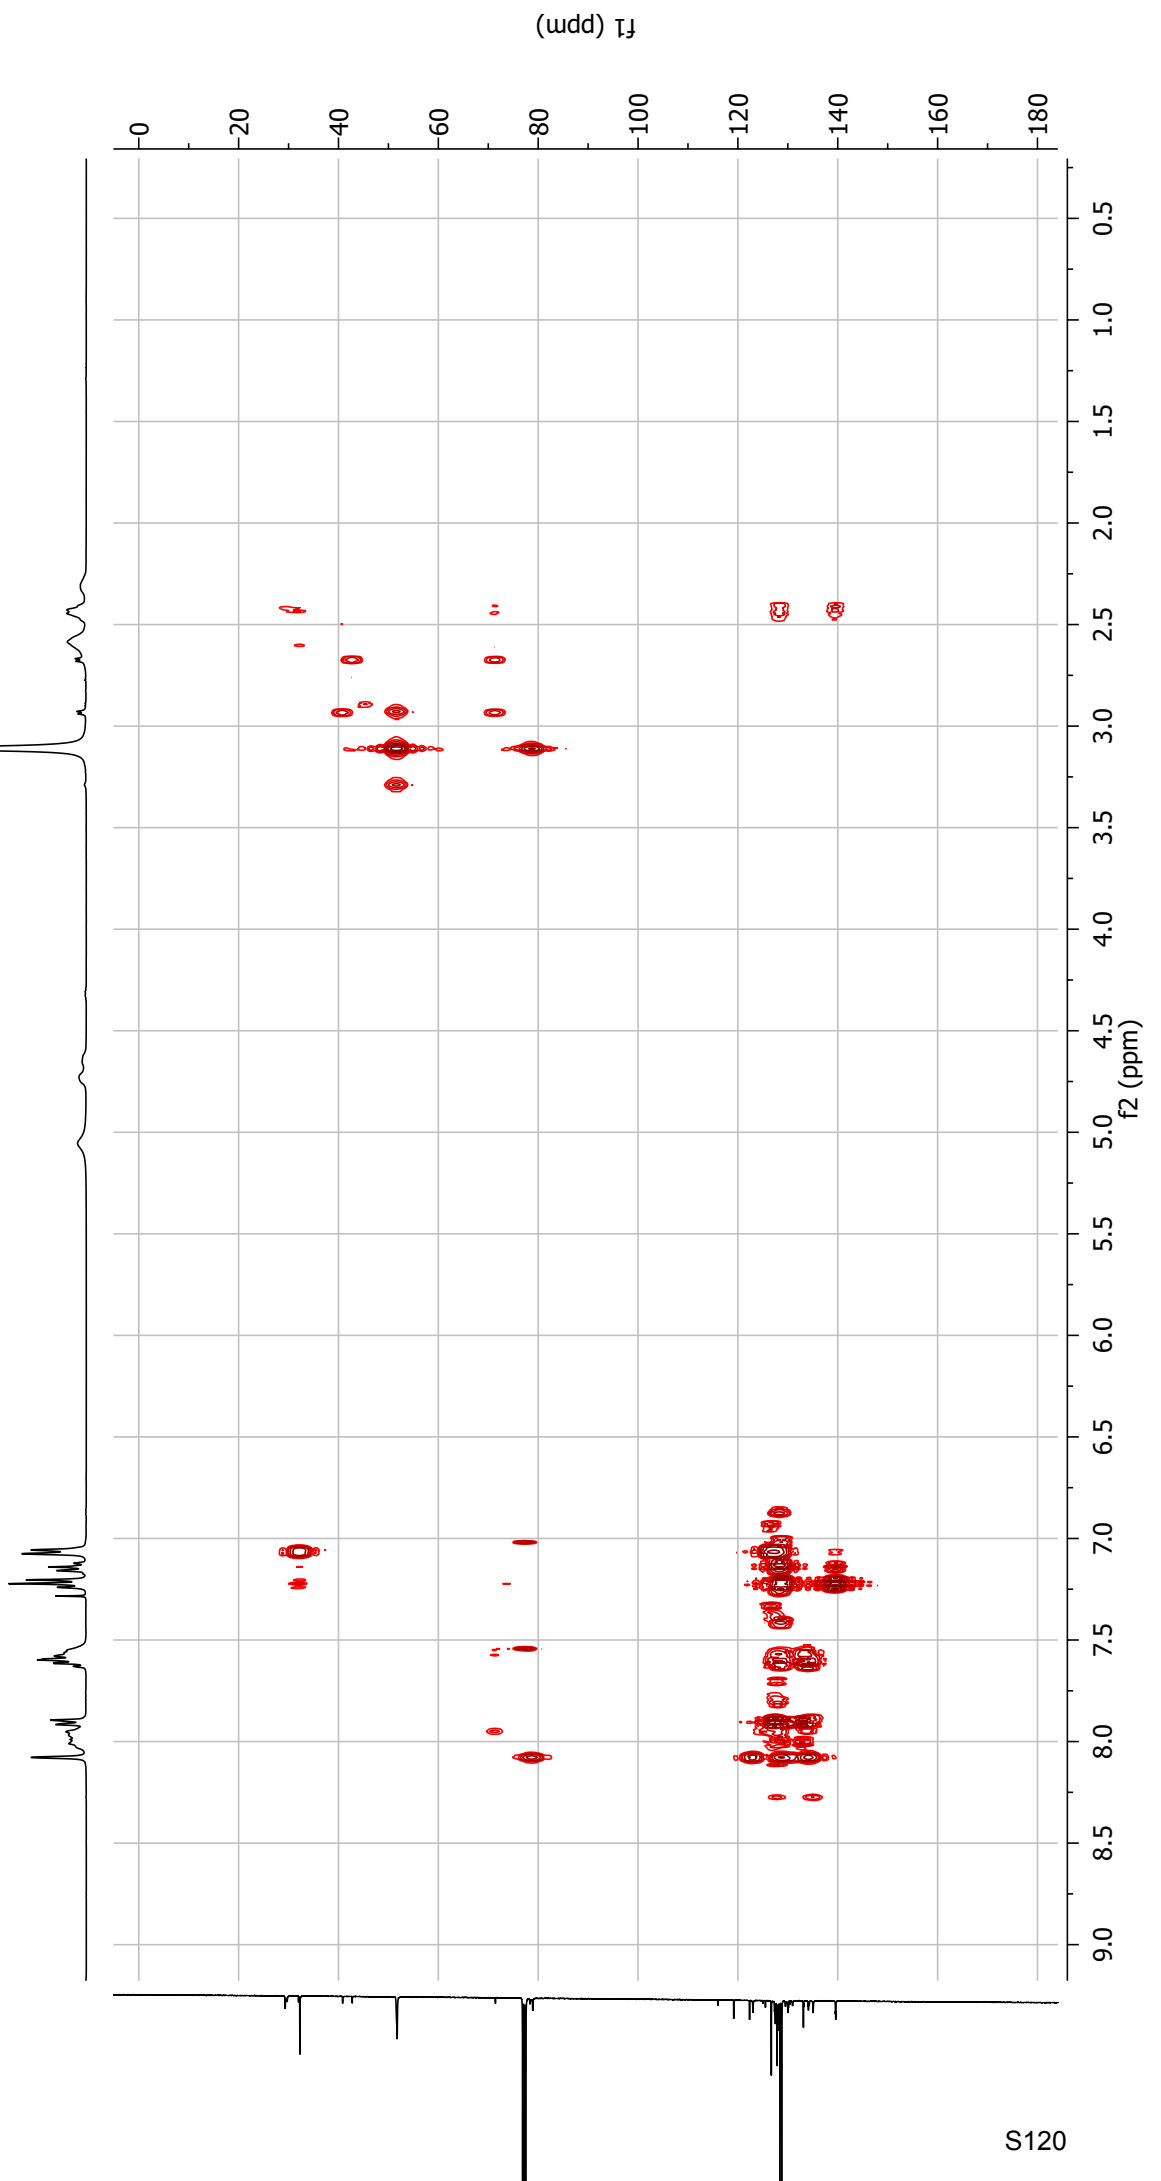



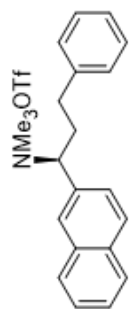

Compound 1j, HSQC

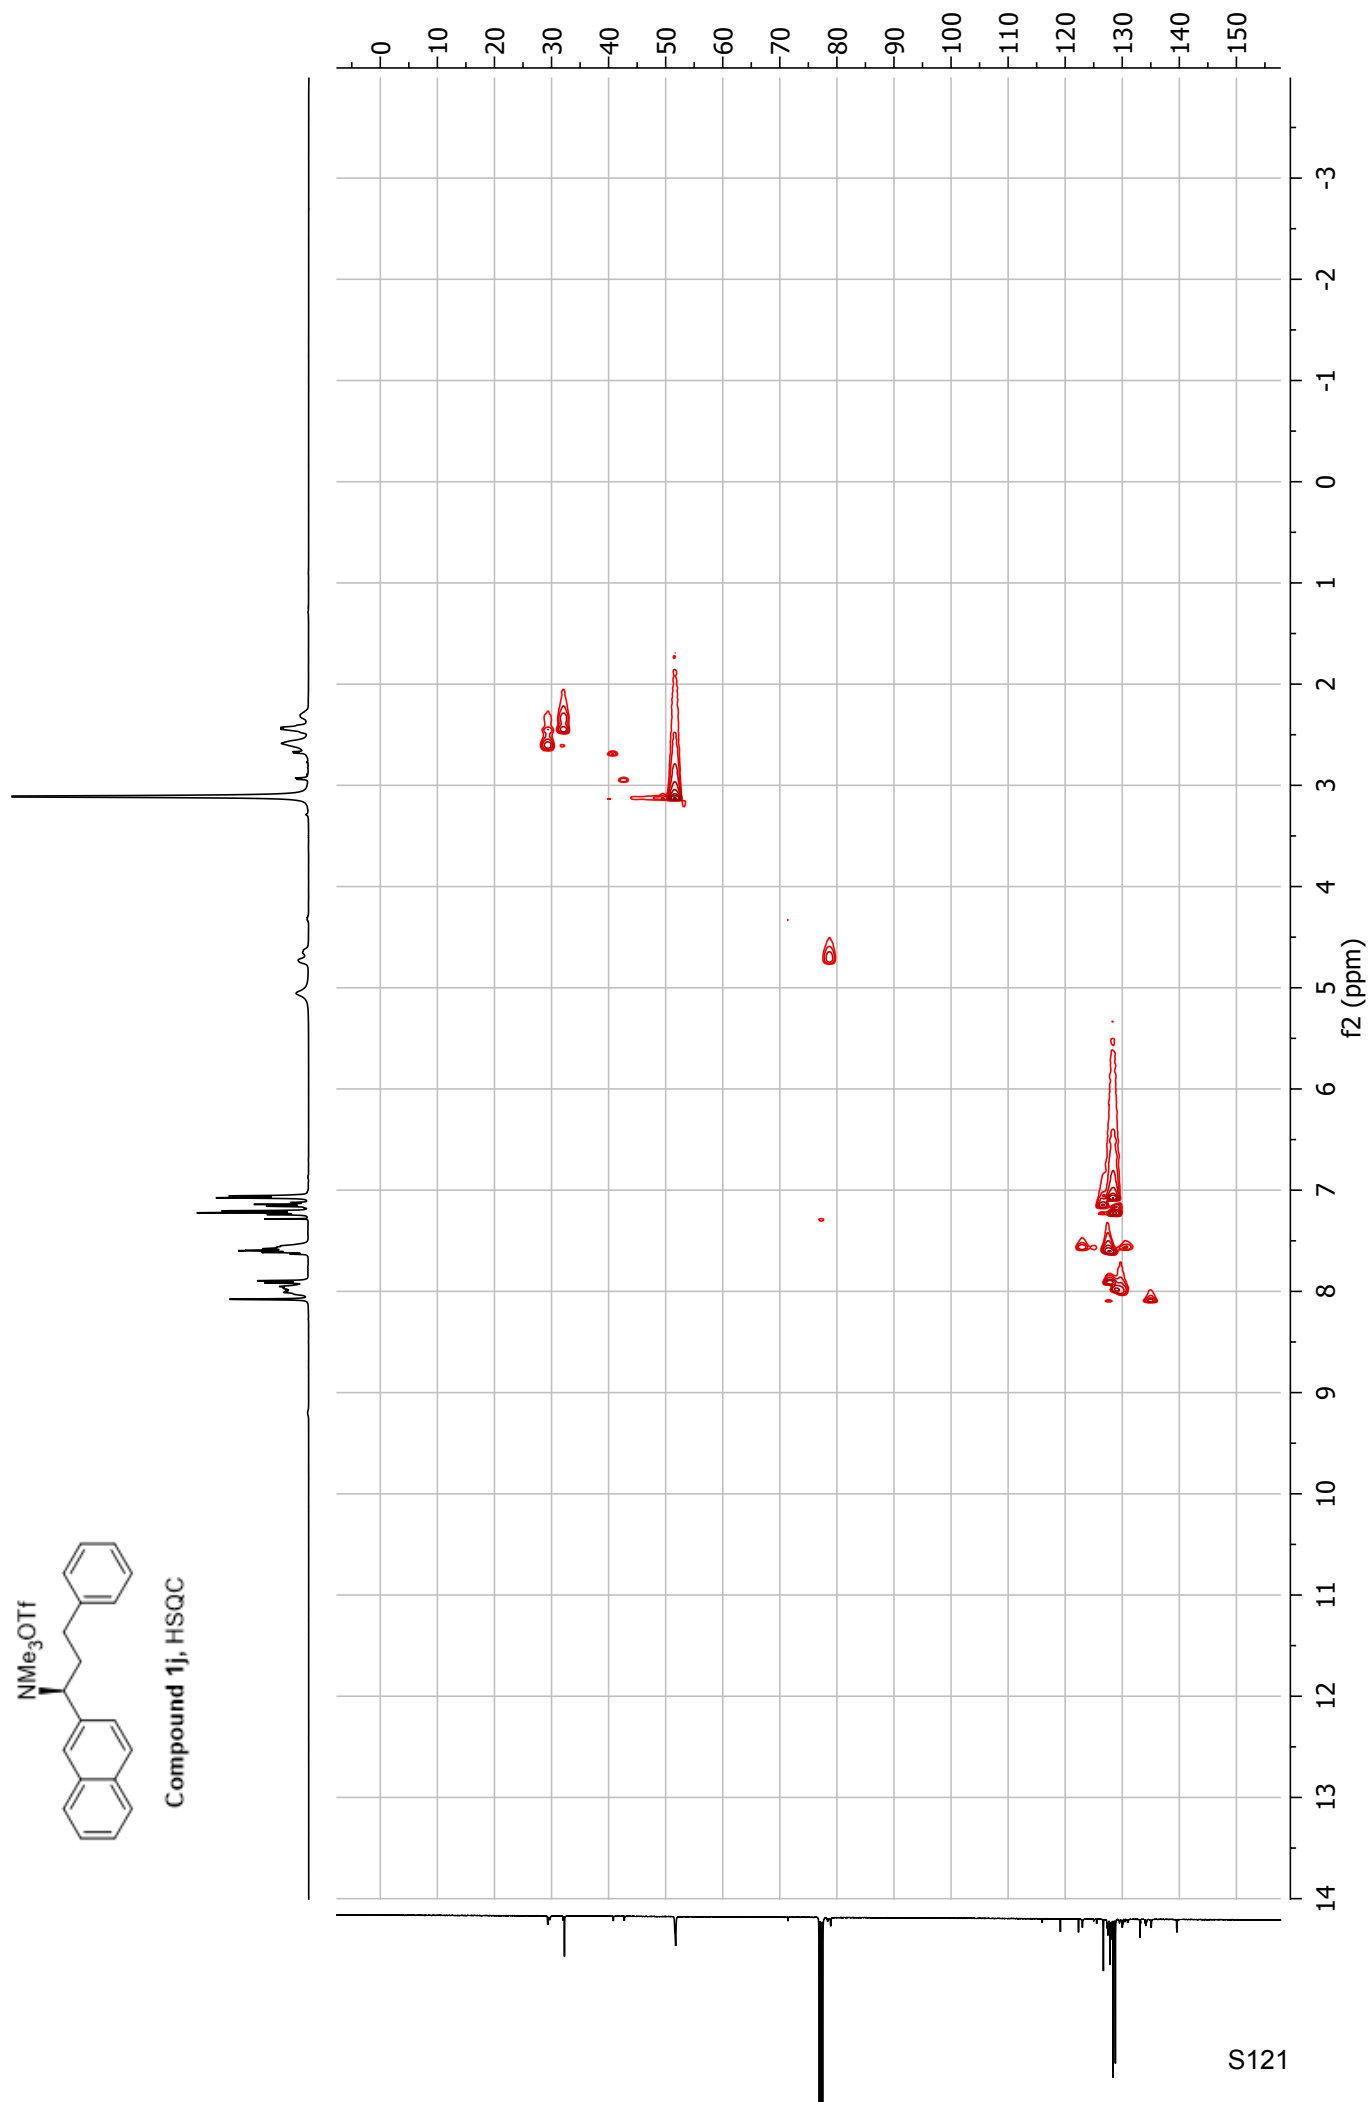

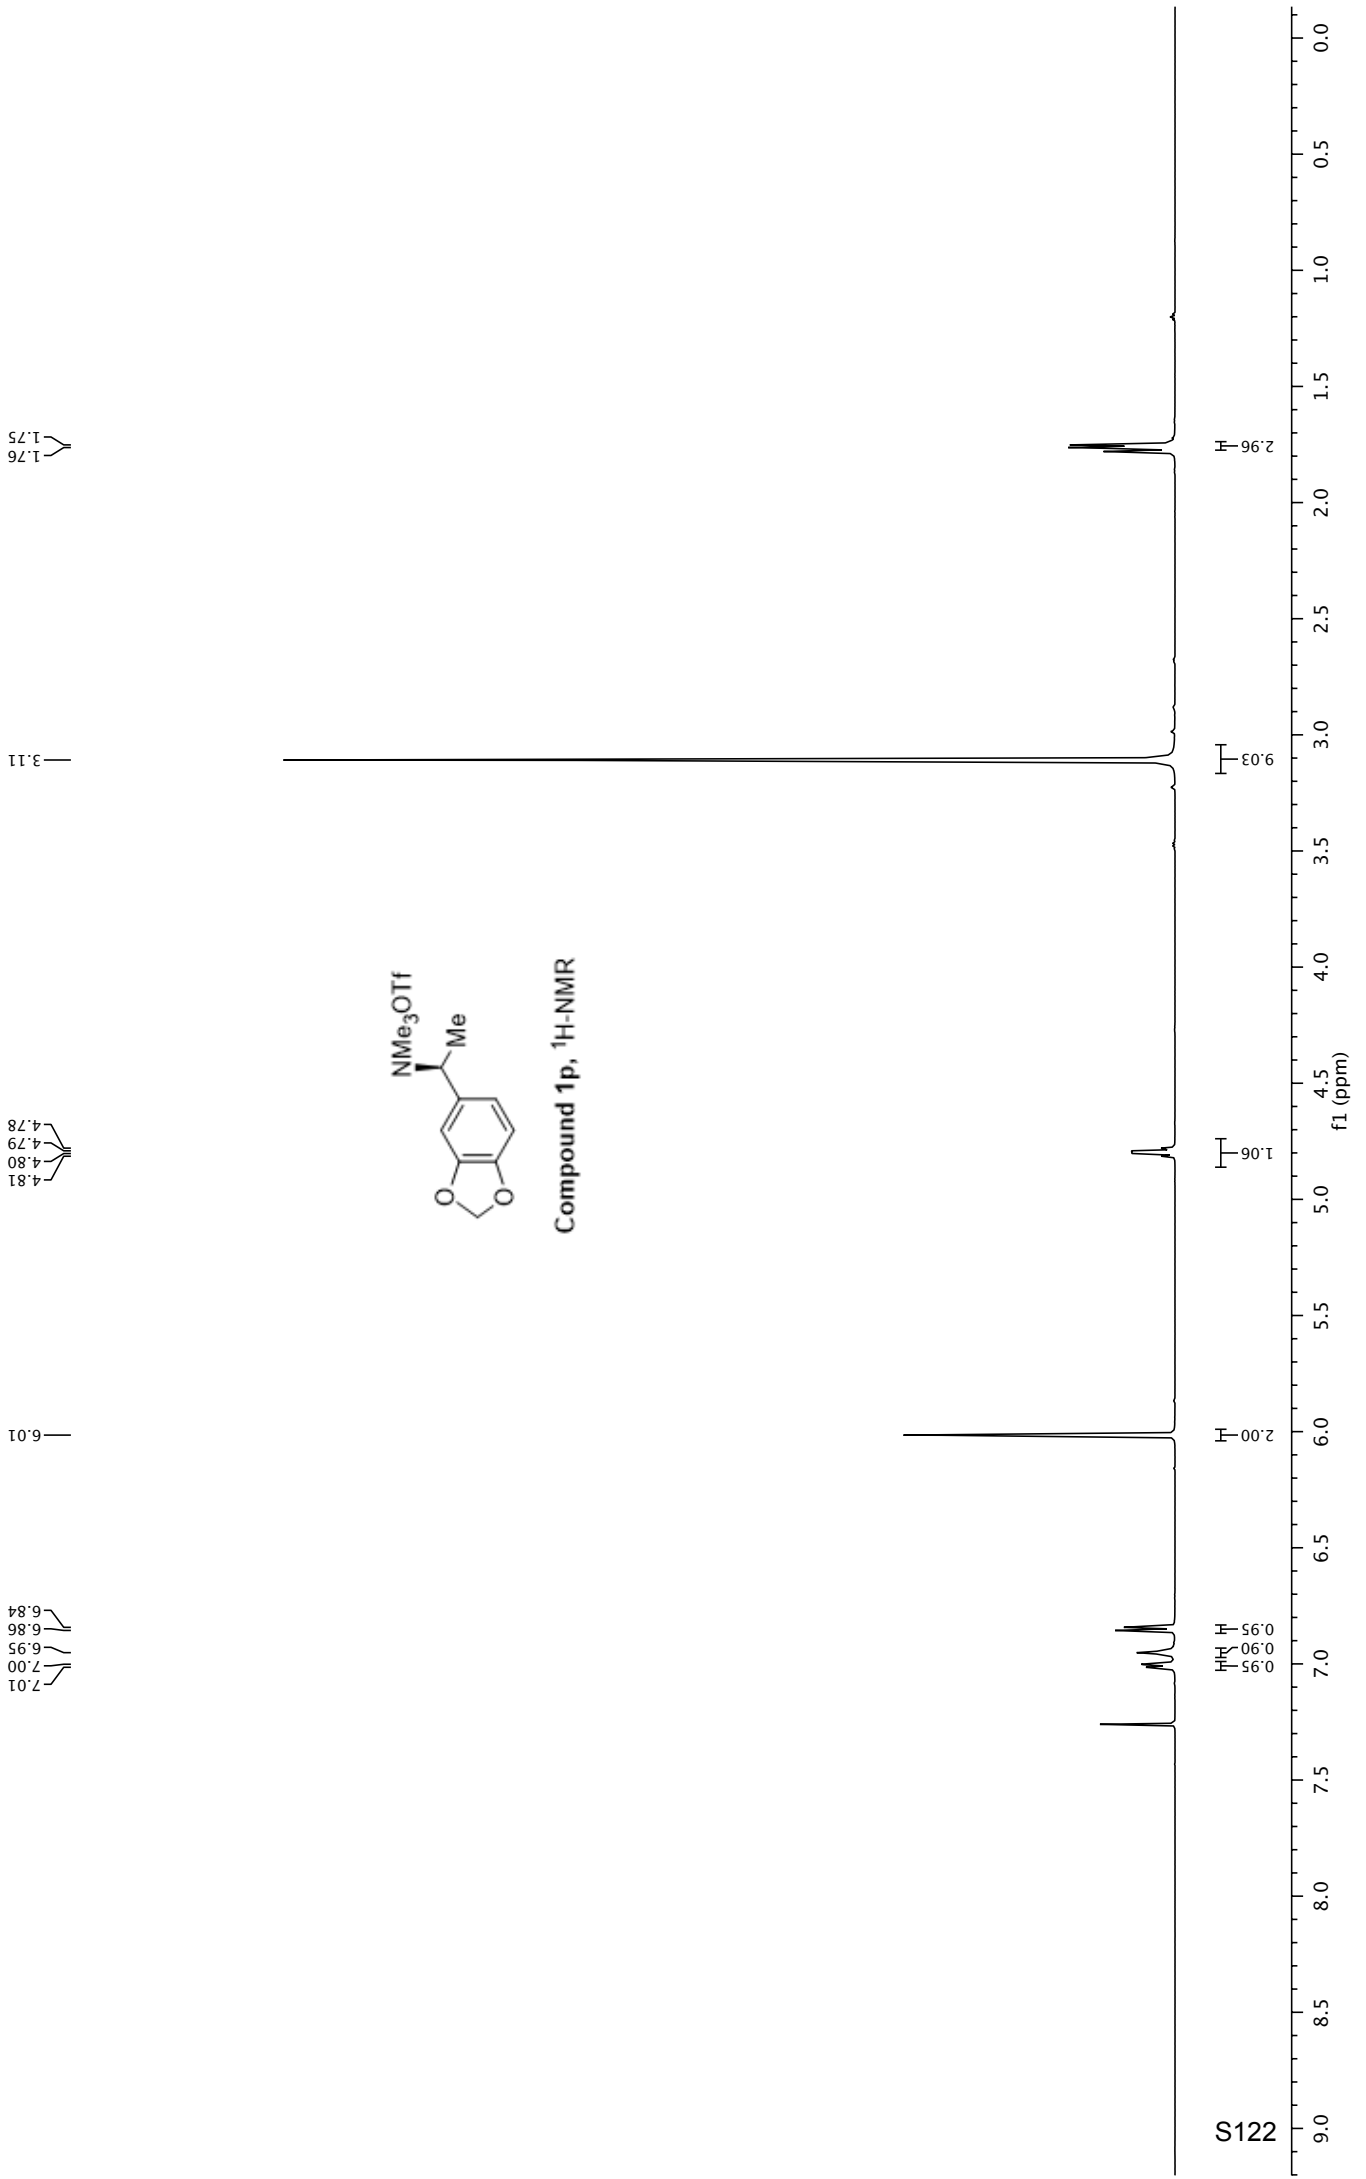

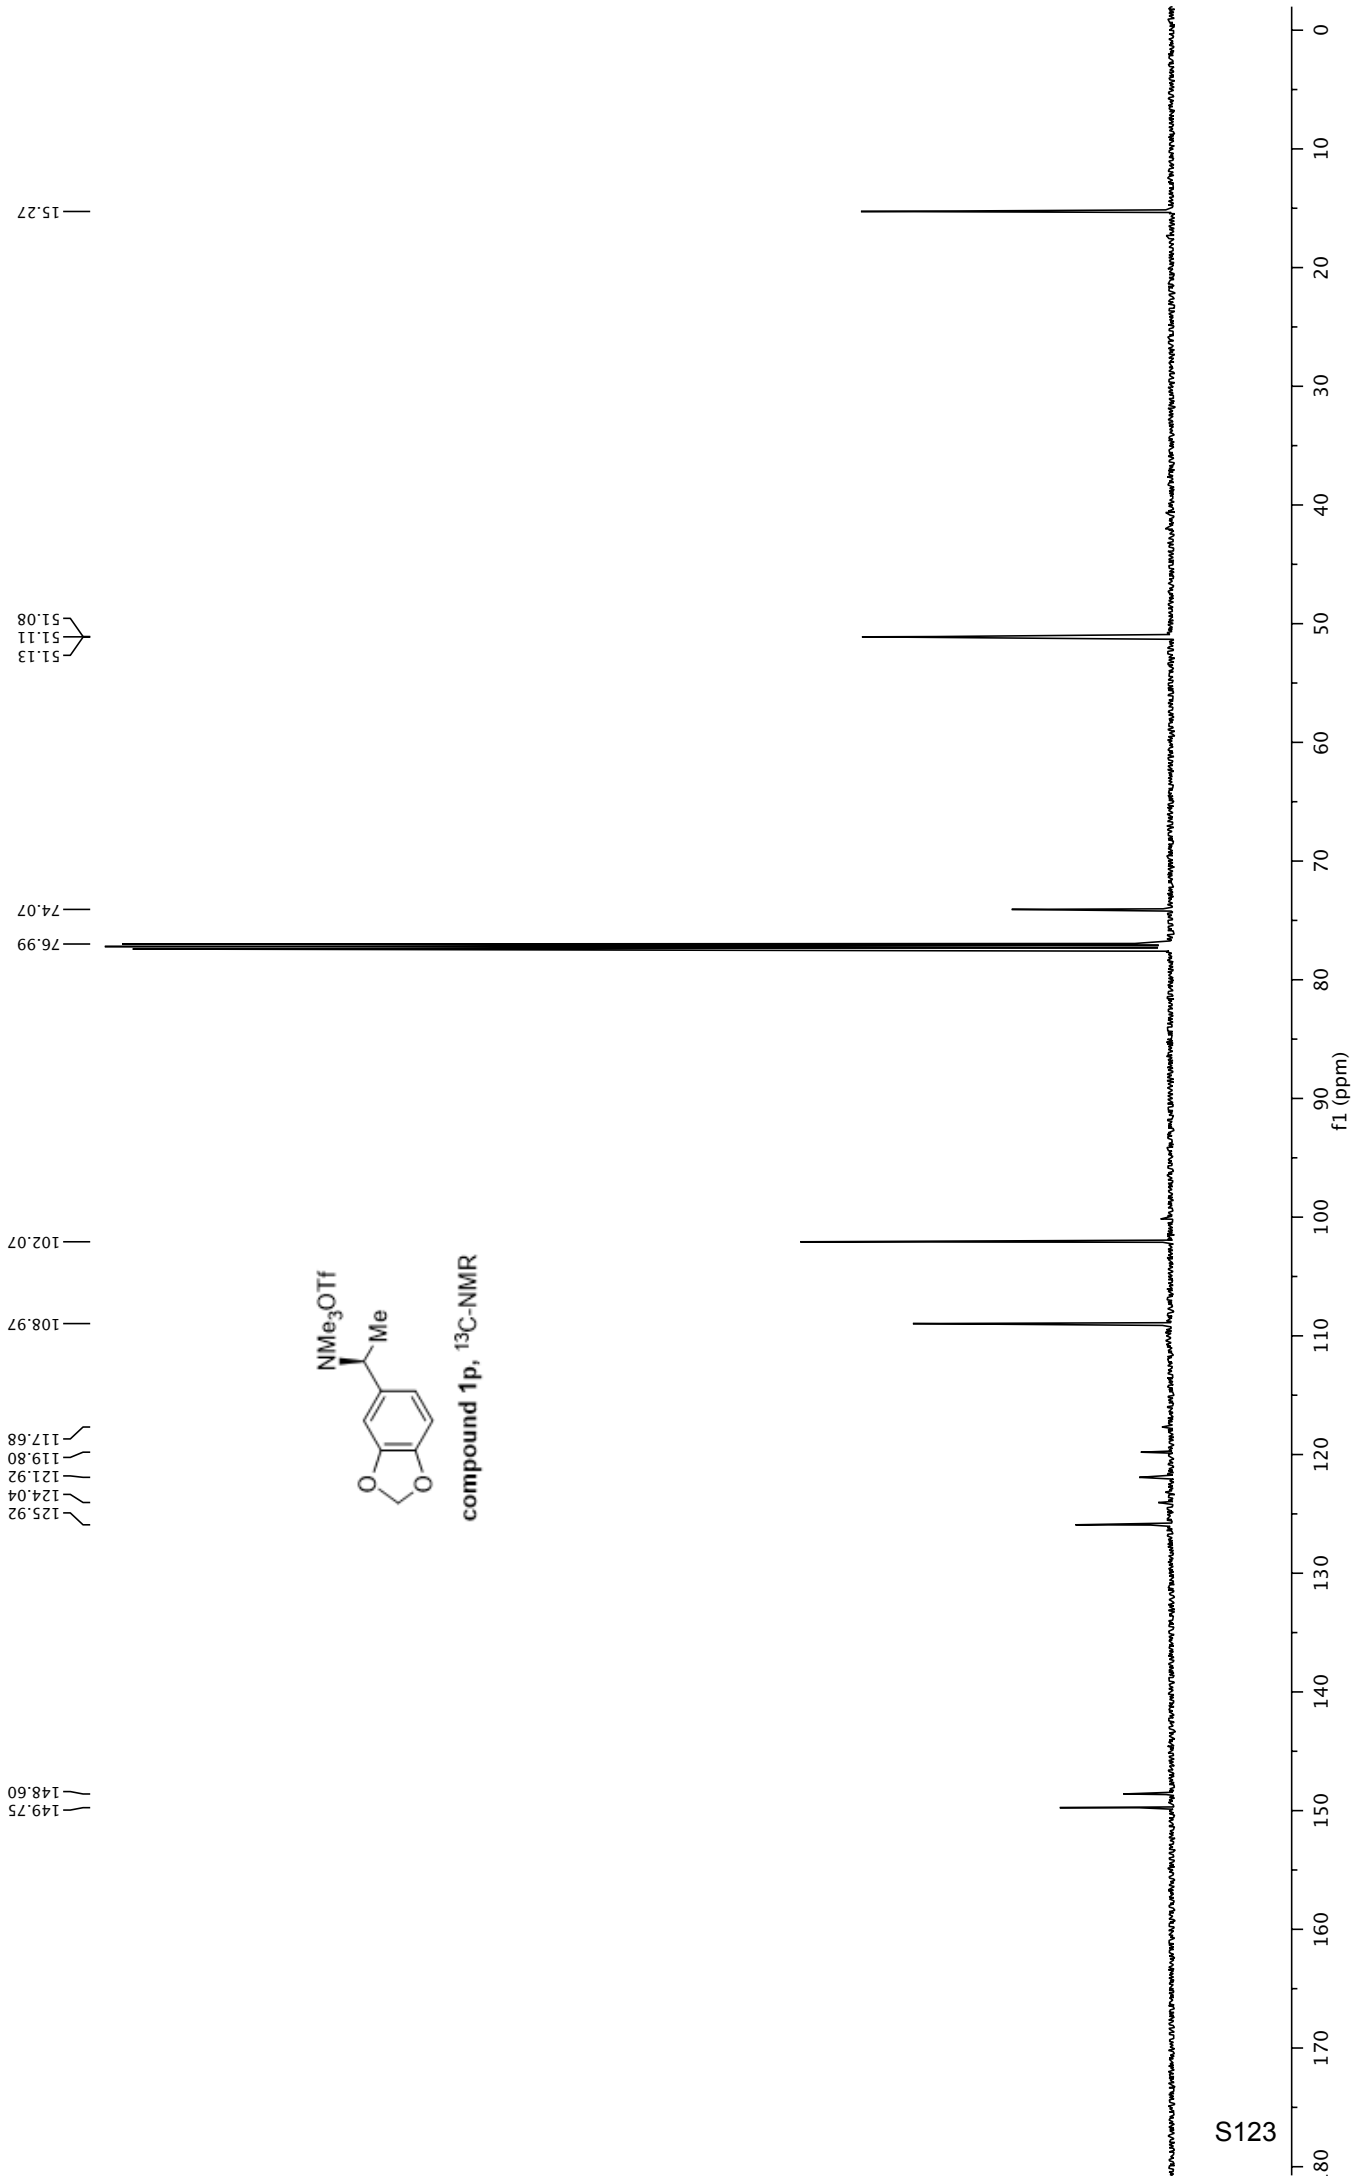

-78.45

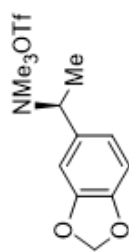

compound 1p, <sup>19</sup>F-NMR

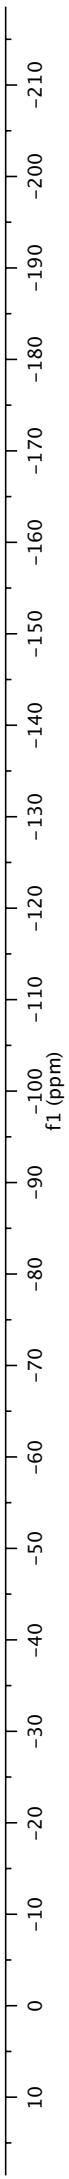

1.94  
1.93

3.16

4.00

5.32  
5.30  
5.29  
5.28

7.49  
7.51  
7.58  
7.59  
7.60  
7.60  
7.61  
7.61  
7.74  
7.75  
7.87  
7.88  
7.88  
7.88  
7.89  
7.89  
8.11  
8.11  
8.12  
8.12  
8.13

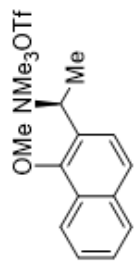

Compound 1q, <sup>1</sup>H-NMR

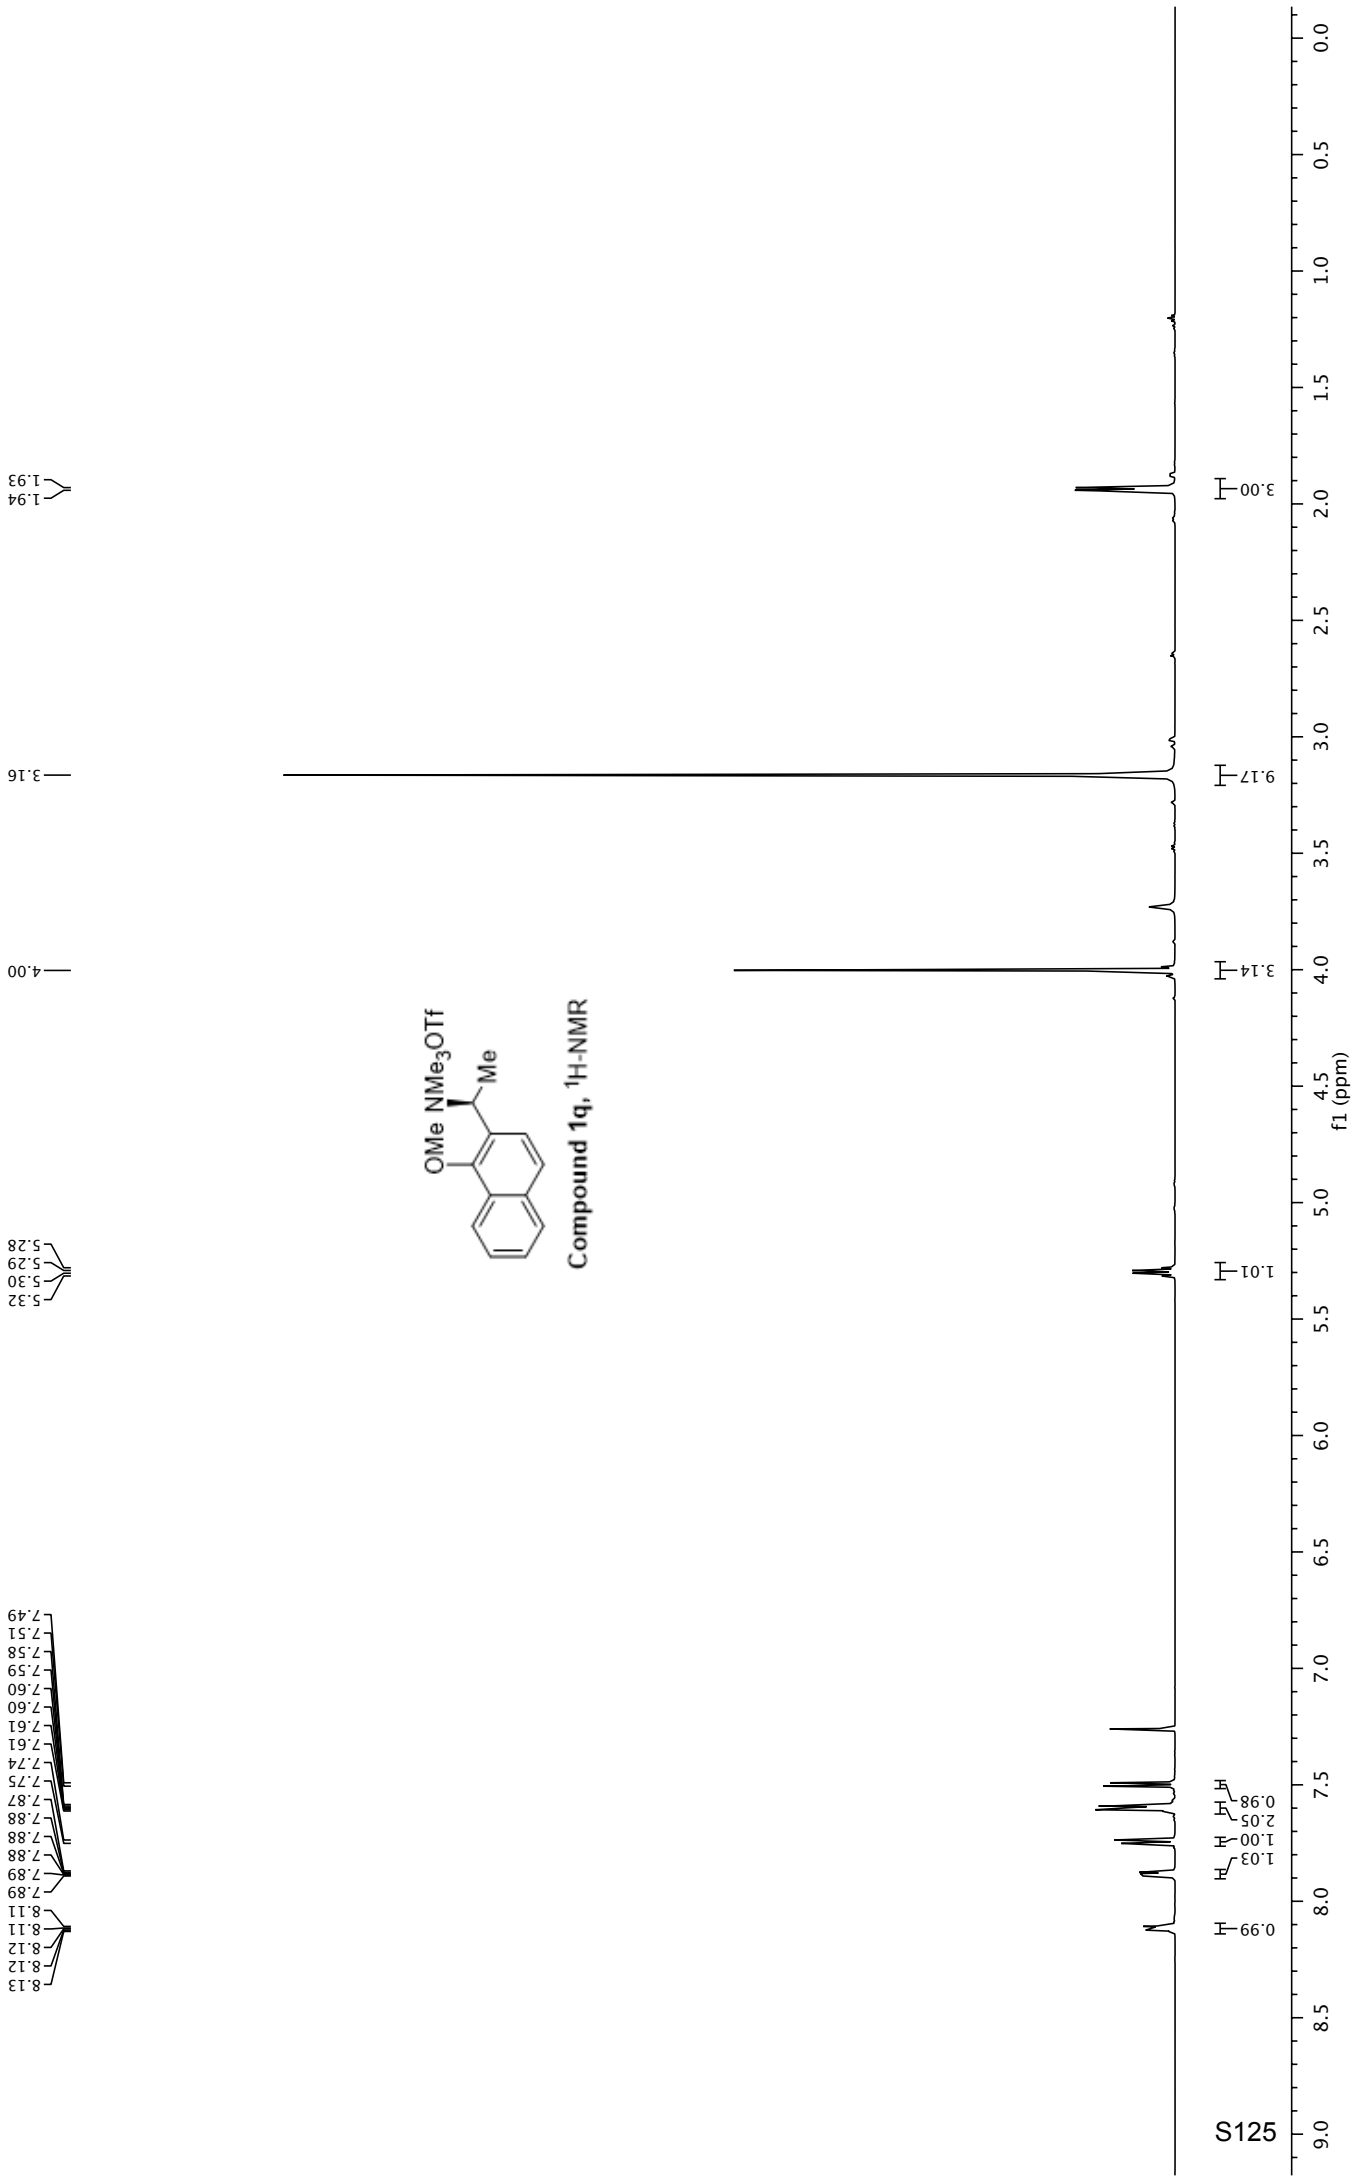

S125

156.44  
135.95  
128.52  
128.35  
127.54  
127.40  
125.58  
124.39  
124.07  
123.30  
121.95  
120.94  
119.83  
117.71  
67.14  
63.90  
51.38  
51.36  
51.34  
15.38

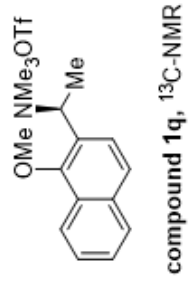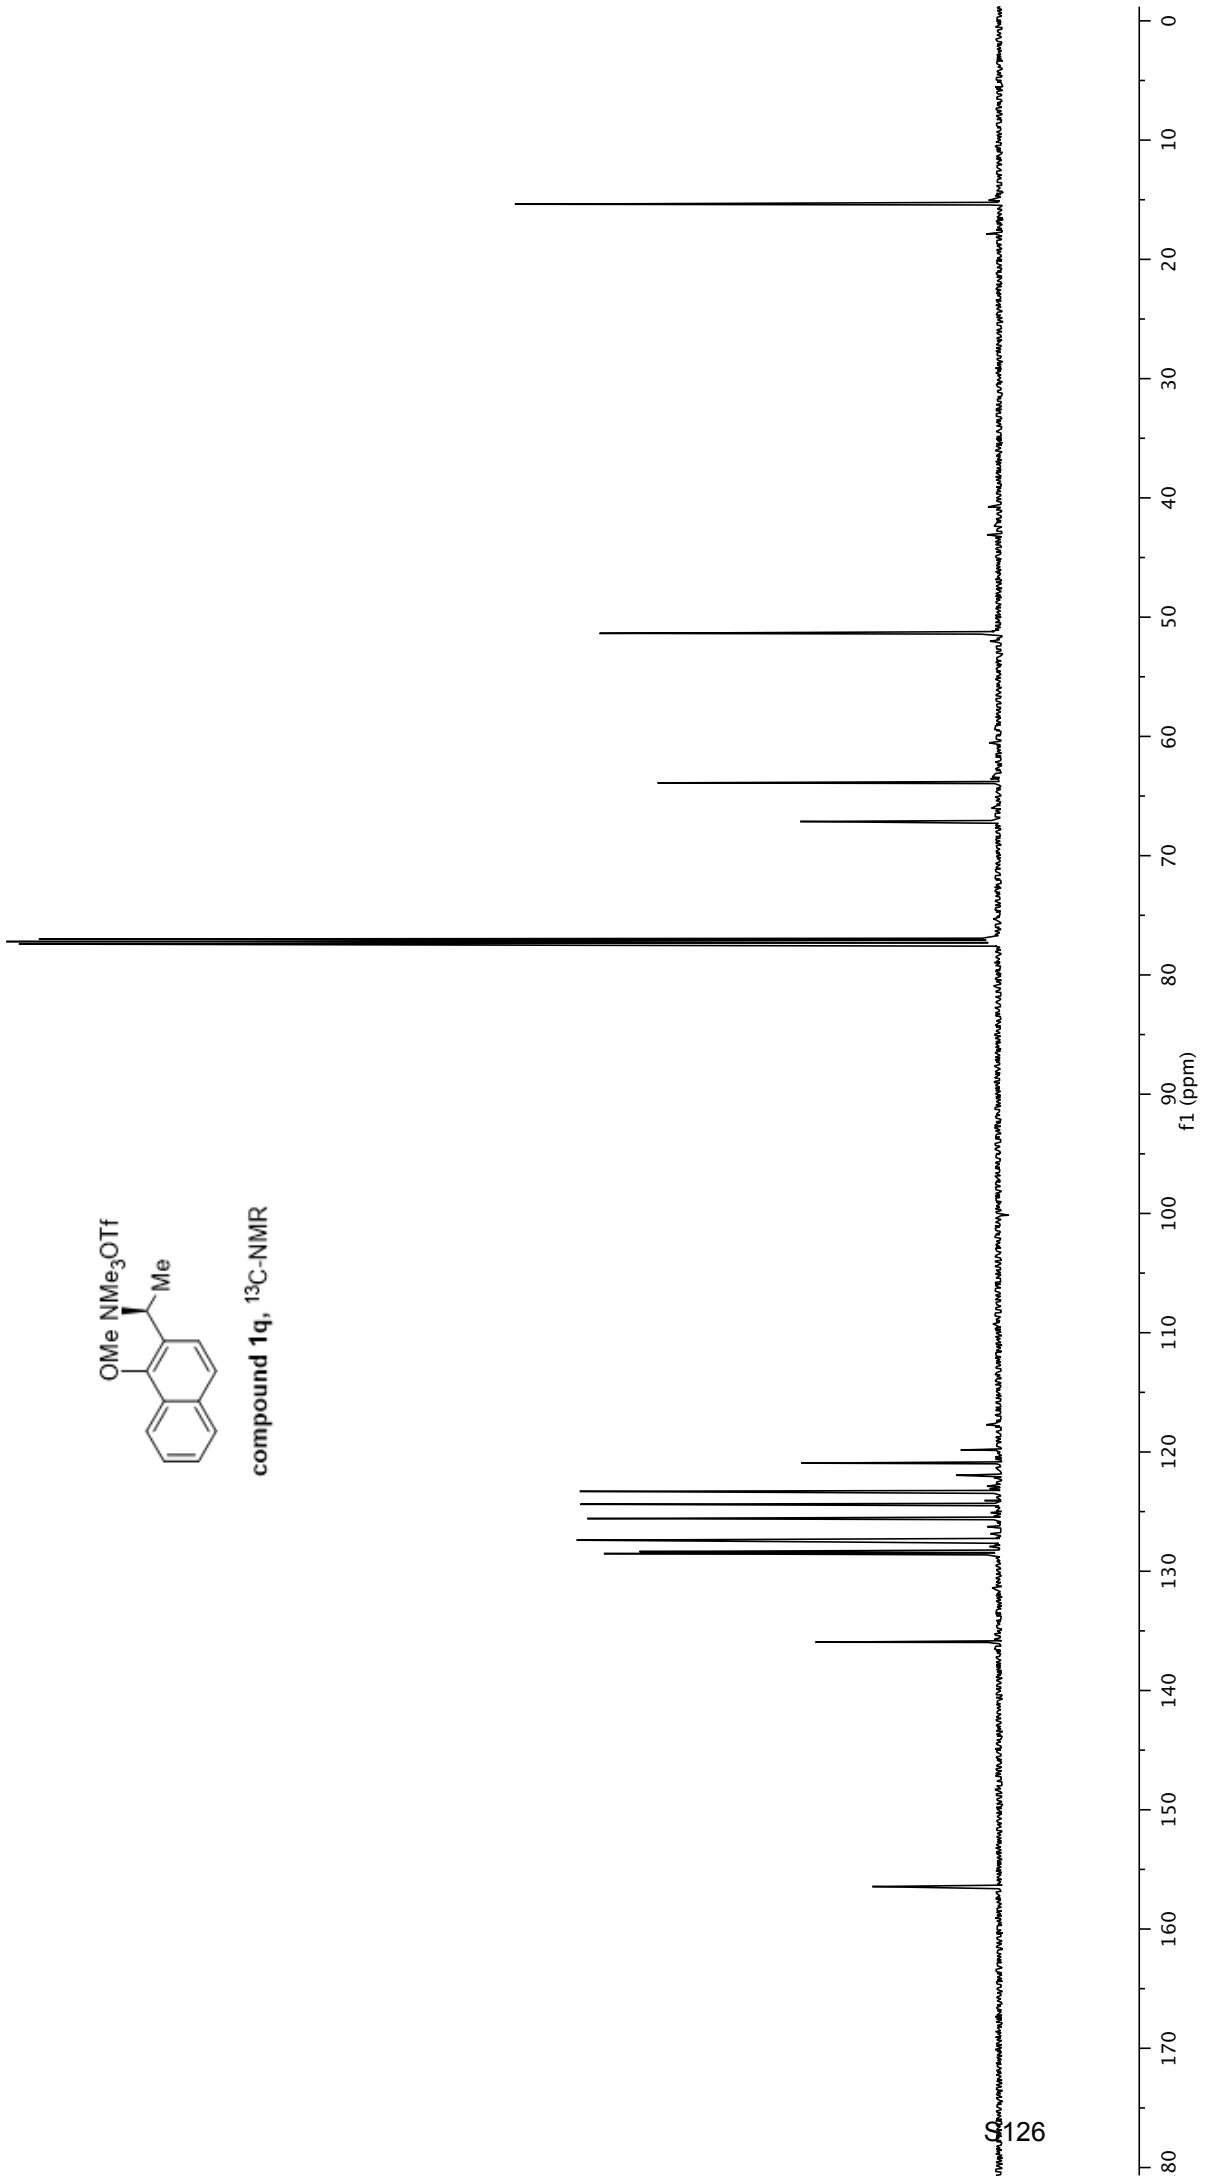

— -78.36

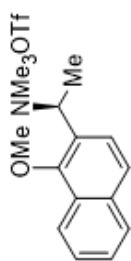

**compound 1q, <sup>19</sup>F-NMR**

S127

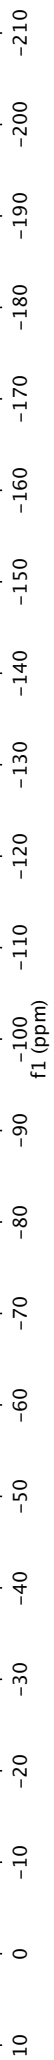

Compound **3a**, racemic (254 nm)

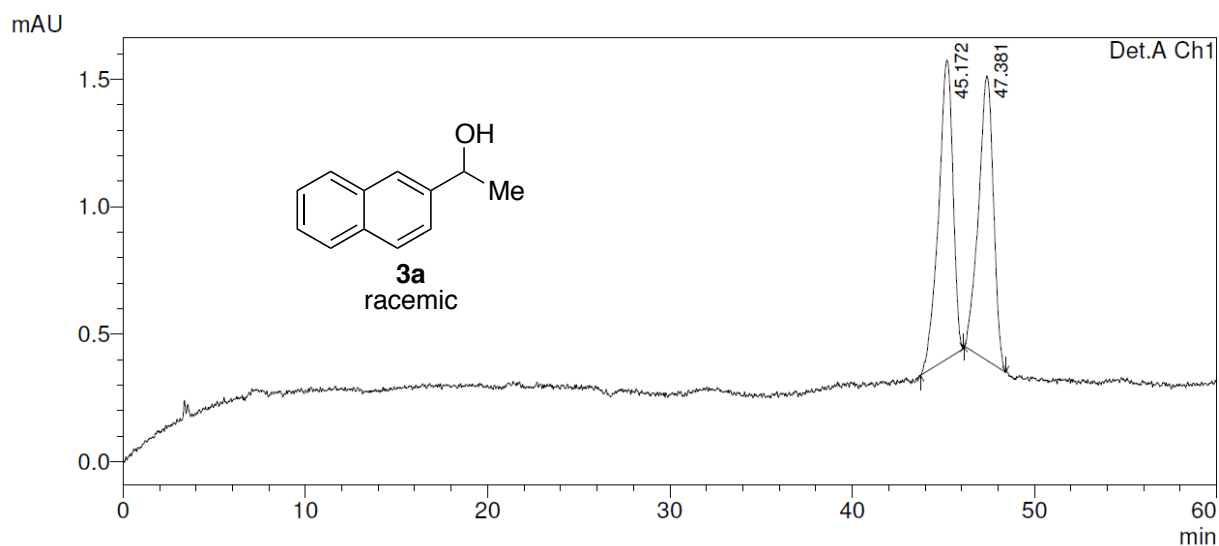

| Peak# | Ret. Time | Area   | Height | Area %  | Height % |
|-------|-----------|--------|--------|---------|----------|
| 1     | 45.172    | 64627  | 1174   | 50.417  | 51.245   |
| 2     | 47.381    | 63558  | 1117   | 49.583  | 48.755   |
| Total |           | 128185 | 2292   | 100.000 | 100.000  |

Compound **3a**, 99% ee (254 nm)

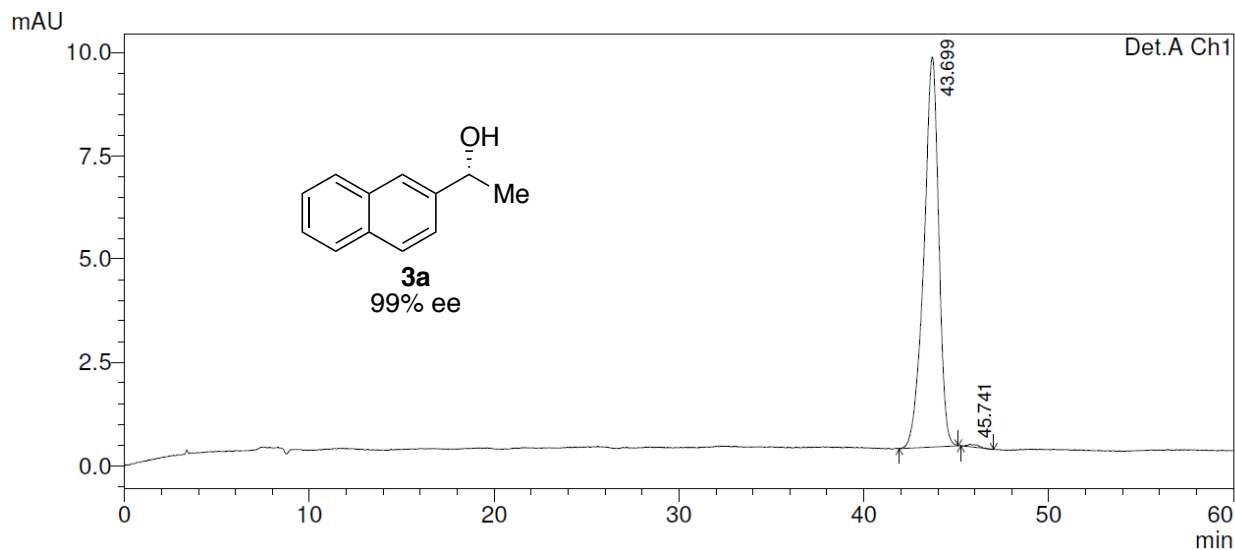

| Peak# | Ret. Time | Area   | Height | Area %  | Height % |
|-------|-----------|--------|--------|---------|----------|
| 1     | 43.699    | 524955 | 9434   | 99.543  | 99.356   |
| 2     | 45.741    | 2408   | 61     | 0.457   | 0.644    |
| Total |           | 527362 | 9495   | 100.000 | 100.000  |



Compound **3b**, racemic (254 nm)

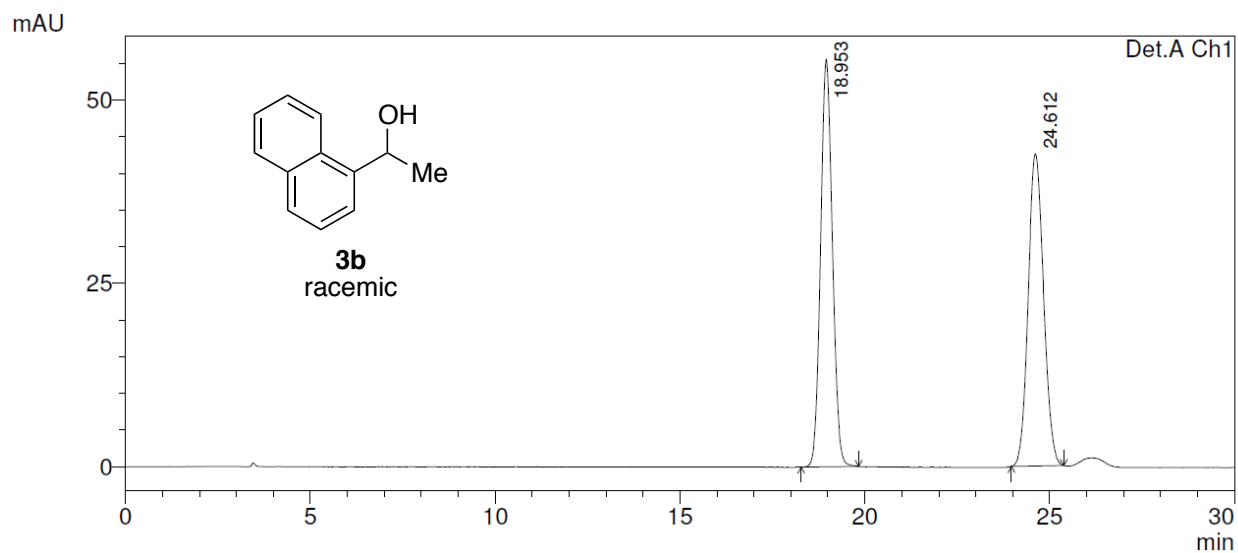

| Peak# | Ret. Time | Area    | Height | Area %  | Height % |
|-------|-----------|---------|--------|---------|----------|
| 1     | 18.953    | 1239231 | 55611  | 50.146  | 56.632   |
| 2     | 24.612    | 1232017 | 42586  | 49.854  | 43.368   |
| Total |           | 2471248 | 98197  | 100.000 | 100.000  |

Compound **3b**, 92% ee (254 nm)

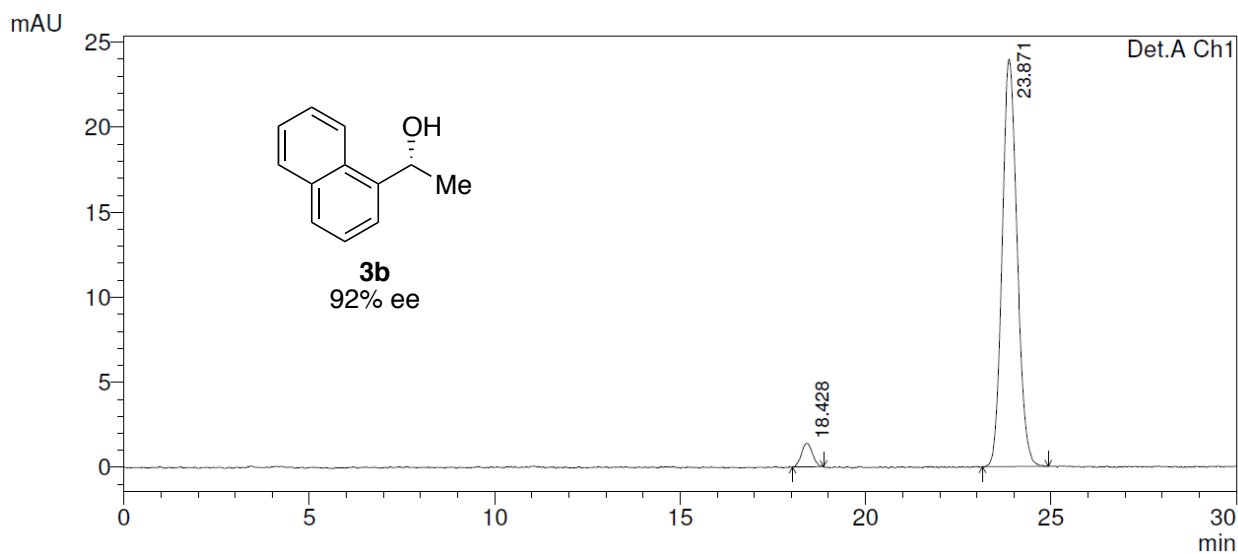

| Peak# | Ret. Time | Area   | Height | Area %  | Height % |
|-------|-----------|--------|--------|---------|----------|
| 1     | 18.428    | 28226  | 1362   | 4.034   | 5.381    |
| 2     | 23.871    | 671567 | 23948  | 95.966  | 94.619   |
| Total |           | 699793 | 25310  | 100.000 | 100.000  |

Compound **3c**, racemic (254 nm)

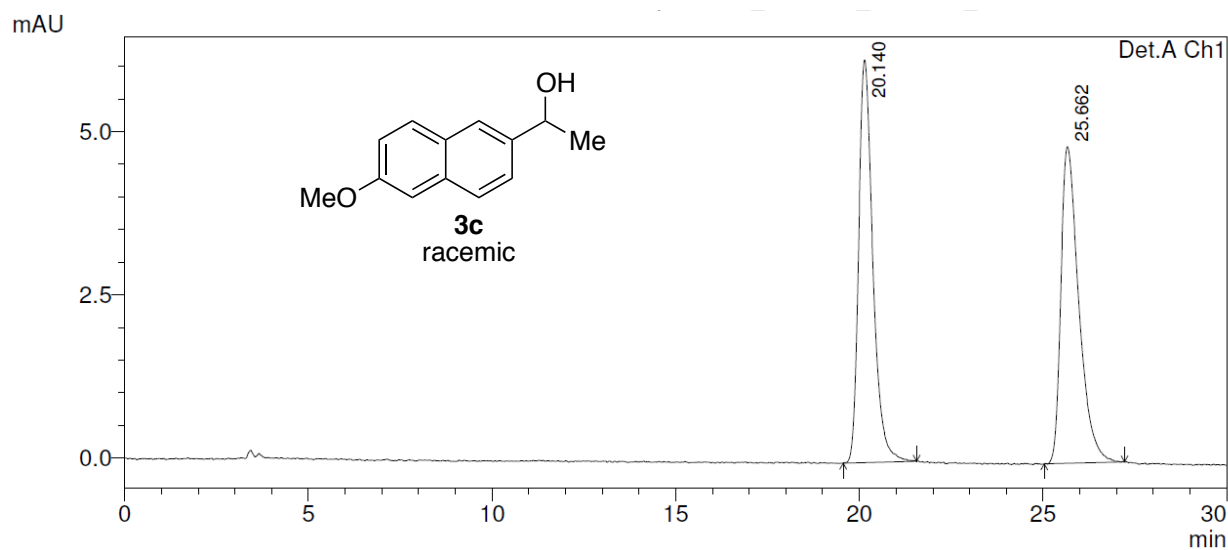

| Peak# | Ret. Time | Area   | Height | Area %  | Height % |
|-------|-----------|--------|--------|---------|----------|
| 1     | 20.140    | 165137 | 6165   | 50.153  | 55.982   |
| 2     | 25.662    | 164128 | 4848   | 49.847  | 44.018   |
| Total |           | 329266 | 11013  | 100.000 | 100.000  |

Compound **3c**, 99% ee (254 nm)

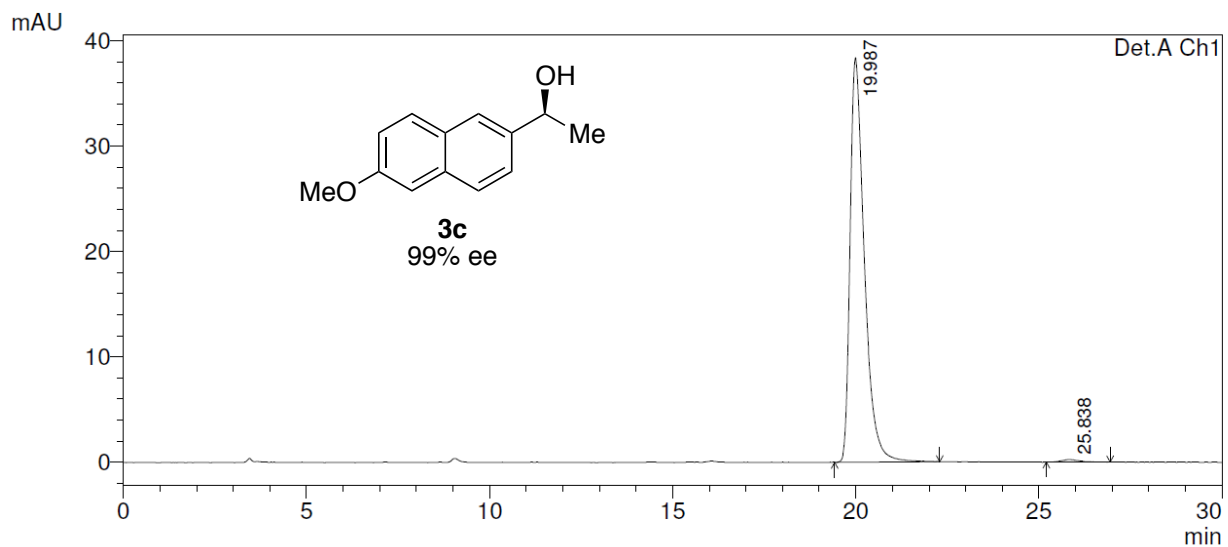

| Peak# | Ret. Time | Area    | Height | Area %  | Height % |
|-------|-----------|---------|--------|---------|----------|
| 1     | 19.987    | 1037849 | 38360  | 99.309  | 99.372   |
| 2     | 25.838    | 7220    | 242    | 0.691   | 0.628    |
| Total |           | 1045069 | 38602  | 100.000 | 100.000  |

Compound **3d**, racemic (254 nm)

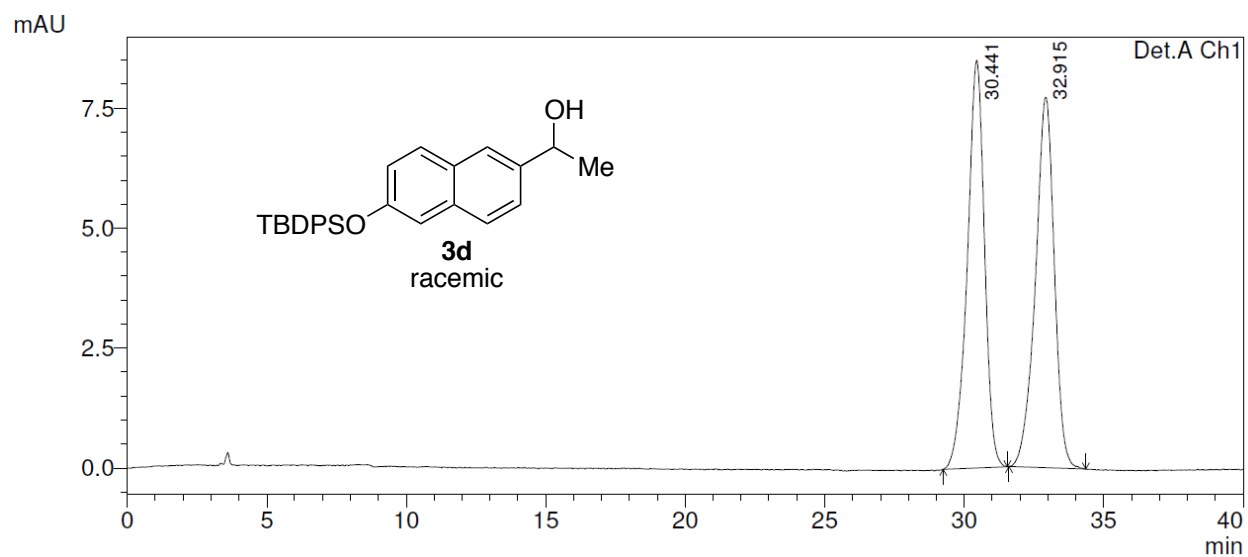

| Peak# | Ret. Time | Area   | Height | Area %  | Height % |
|-------|-----------|--------|--------|---------|----------|
| 1     | 30.441    | 364152 | 8496   | 49.958  | 52.369   |
| 2     | 32.915    | 364762 | 7727   | 50.042  | 47.631   |
| Total |           | 728913 | 16223  | 100.000 | 100.000  |

Compound **3d**, 92% ee (254 nm)

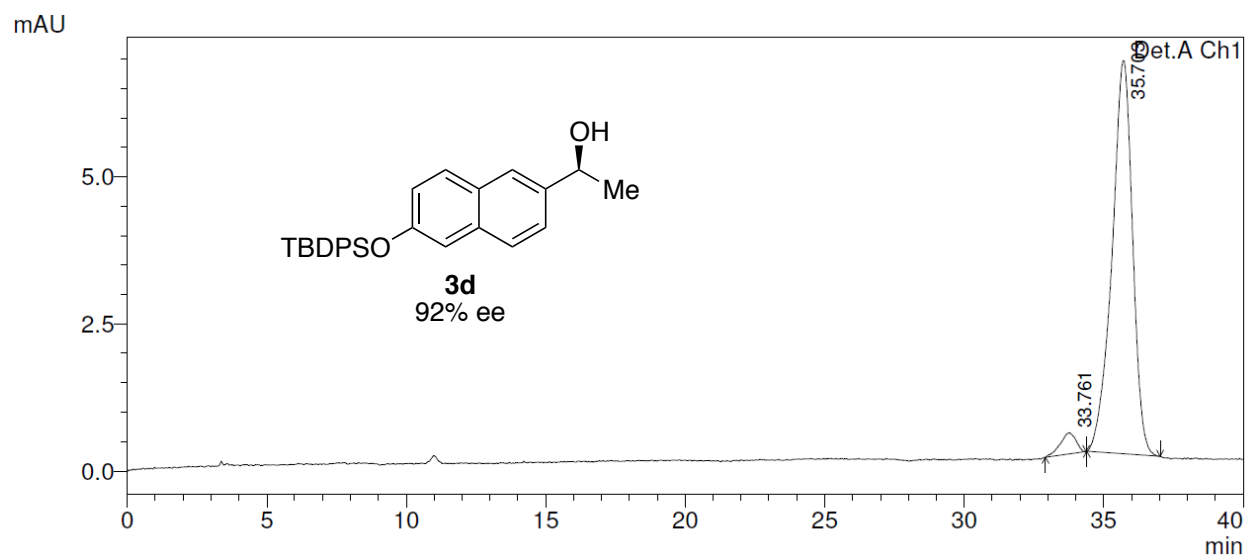

| Peak# | Ret. Time | Area   | Height | Area %  | Height % |
|-------|-----------|--------|--------|---------|----------|
| 1     | 33.761    | 14125  | 358    | 3.958   | 5.084    |
| 2     | 35.703    | 342763 | 6682   | 96.042  | 94.916   |
| Total |           | 356888 | 7040   | 100.000 | 100.000  |

Compound **3e**, racemic (254 nm)

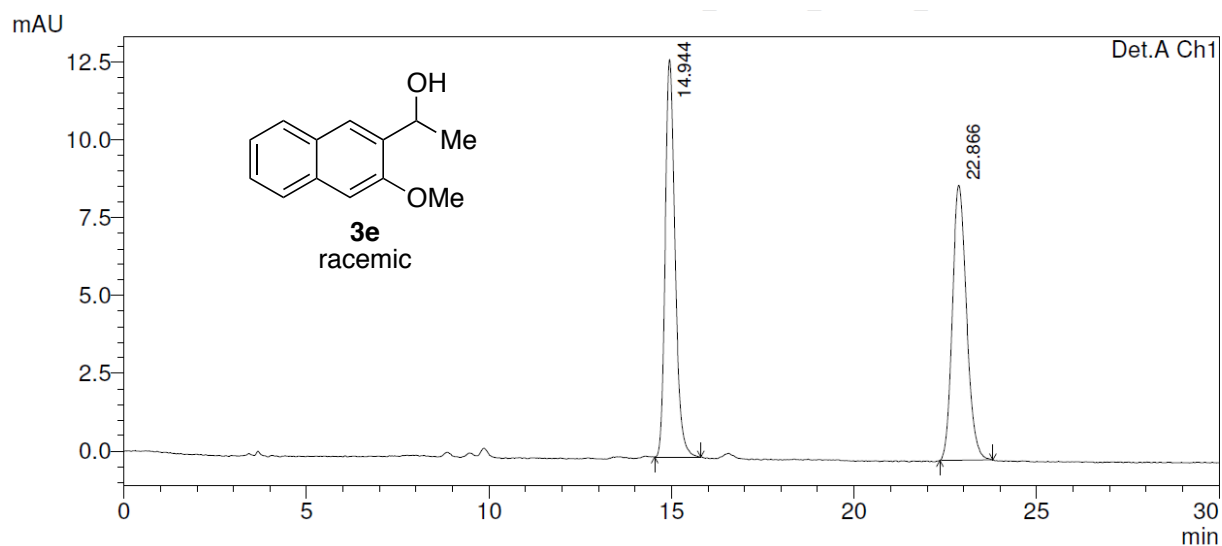

| Peak# | Ret. Time | Area   | Height | Area %  | Height % |
|-------|-----------|--------|--------|---------|----------|
| 1     | 14.944    | 239370 | 12773  | 50.150  | 59.107   |
| 2     | 22.866    | 237935 | 8837   | 49.850  | 40.893   |
| Total |           | 477305 | 21610  | 100.000 | 100.000  |

Compound **3e**, 95% ee (254 nm)

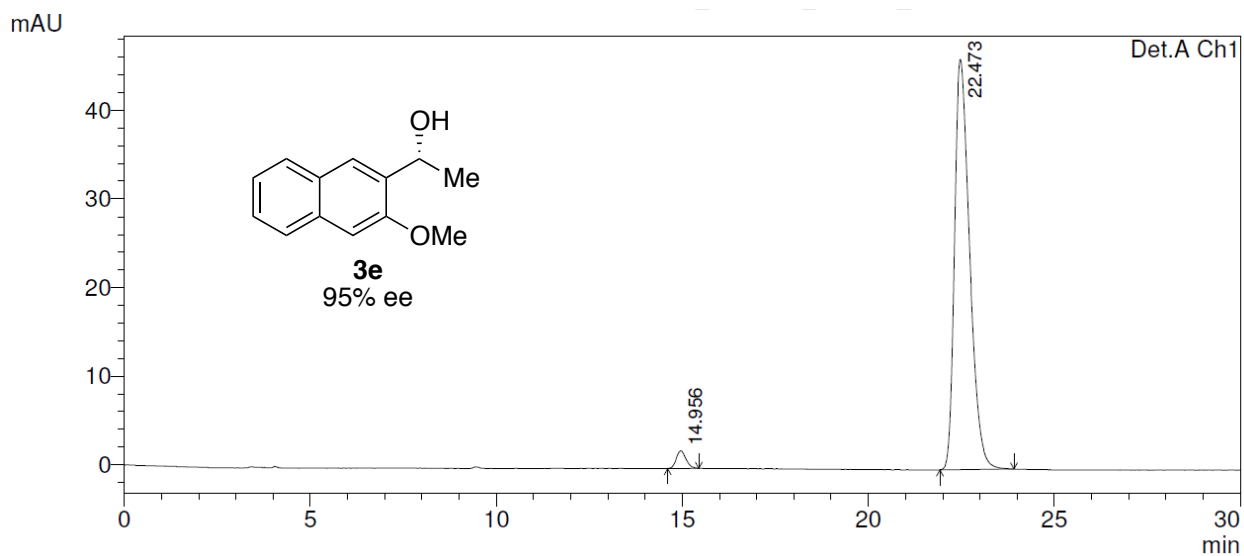

| Peak# | Ret. Time | Area    | Height | Area %  | Height % |
|-------|-----------|---------|--------|---------|----------|
| 1     | 14.956    | 35963   | 1982   | 2.675   | 4.104    |
| 2     | 22.473    | 1308675 | 46315  | 97.325  | 95.896   |
| Total |           | 1344638 | 48297  | 100.000 | 100.000  |

Compound **3f**, racemic (254 nm)

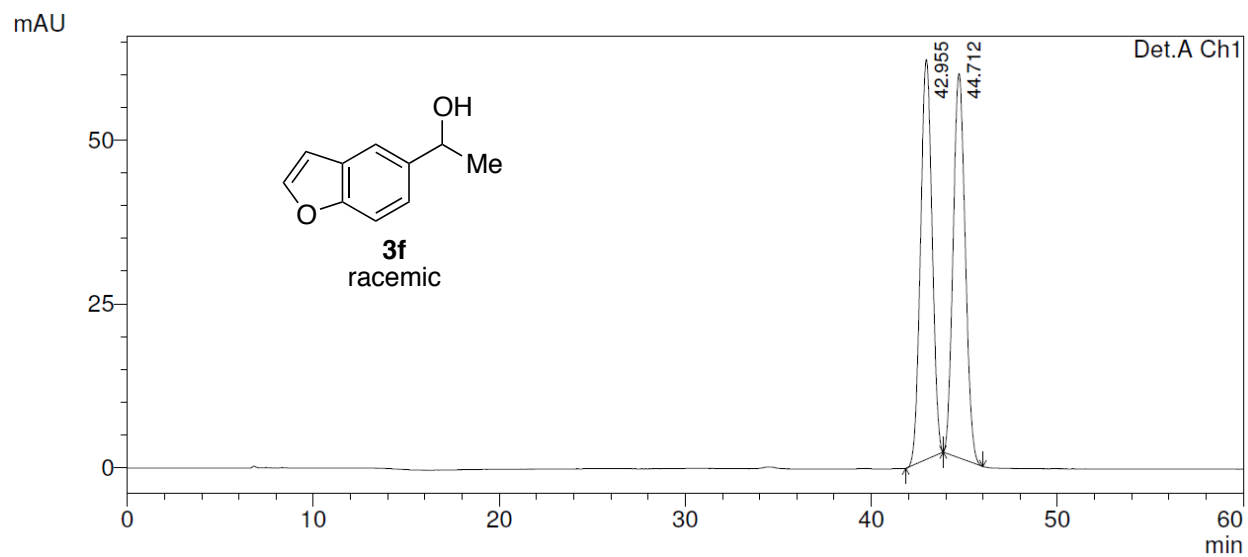

| Peak# | Ret. Time | Area    | Height | Area %  | Height % |
|-------|-----------|---------|--------|---------|----------|
| 1     | 42.955    | 2640838 | 61031  | 49.950  | 51.012   |
| 2     | 44.712    | 2646127 | 58610  | 50.050  | 48.988   |
| Total |           | 5286965 | 119641 | 100.000 | 100.000  |

Compound **3f**, 98% ee (254 nm)

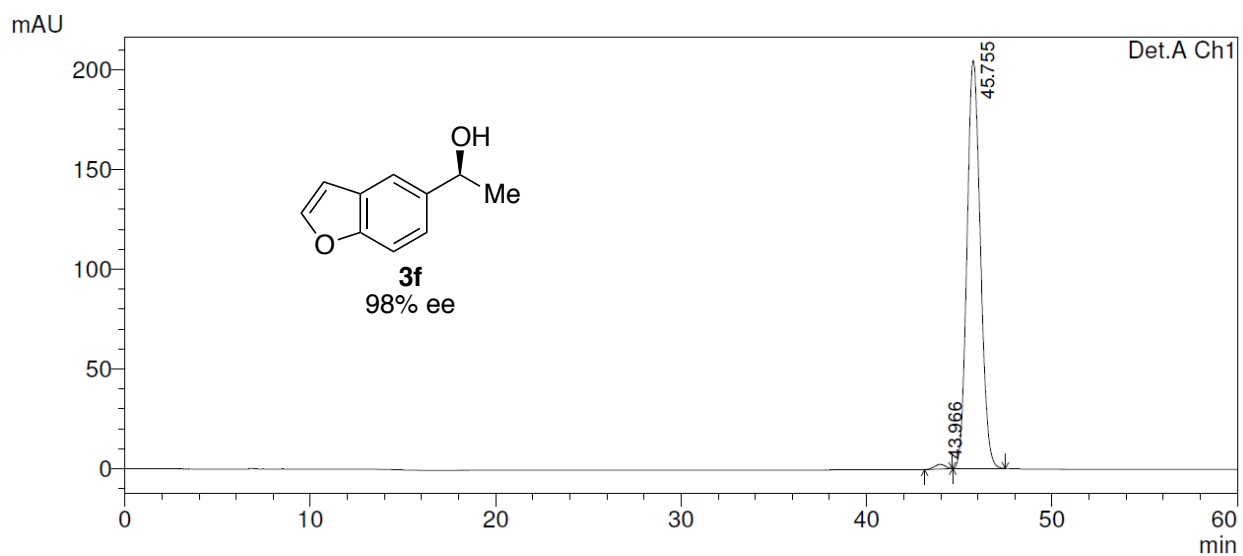

| Peak# | Ret. Time | Area     | Height | Area %  | Height % |
|-------|-----------|----------|--------|---------|----------|
| 1     | 43.966    | 90232    | 2245   | 0.873   | 1.086    |
| 2     | 45.755    | 10242584 | 204407 | 99.127  | 98.914   |
| Total |           | 10332816 | 206652 | 100.000 | 100.000  |

Compound **3g**, racemic (254 nm)

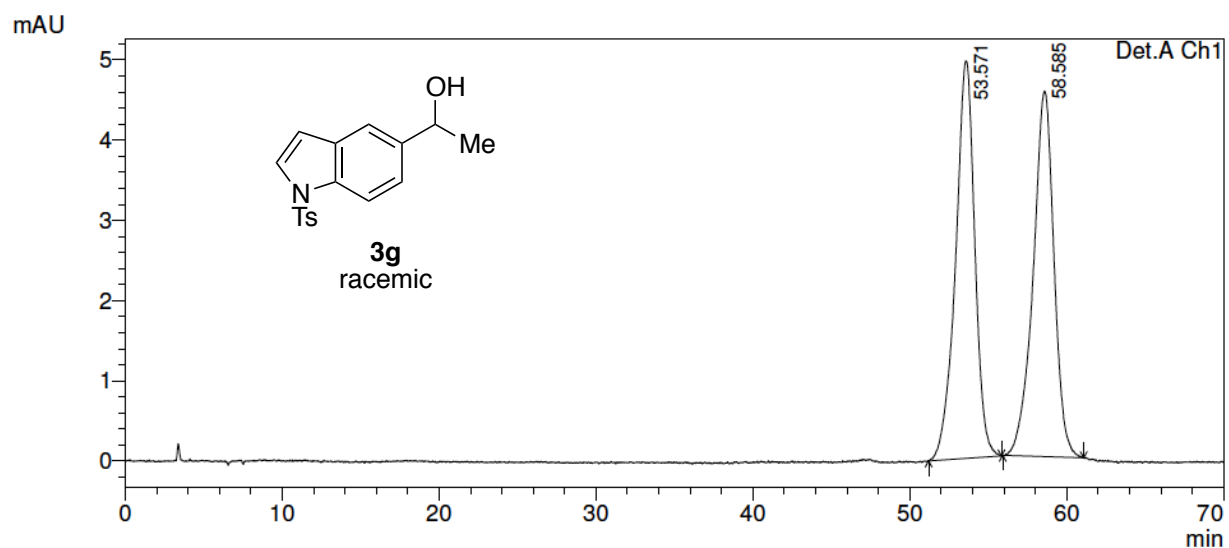

| Peak# | Ret. Time | Area   | Height | Area %  | Height % |
|-------|-----------|--------|--------|---------|----------|
| 1     | 53.571    | 422898 | 4957   | 50.129  | 52.089   |
| 2     | 58.585    | 420722 | 4559   | 49.871  | 47.911   |
| Total |           | 843620 | 9516   | 100.000 | 100.000  |

Compound **3g**, 96% ee (254 nm)

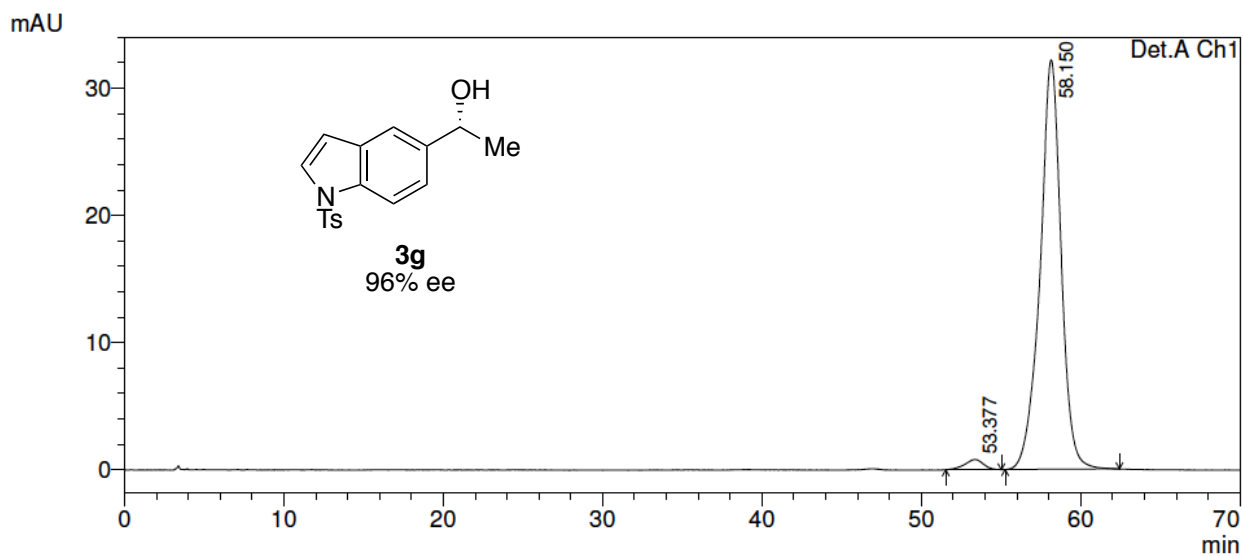

| Peak# | Ret. Time | Area    | Height | Area %  | Height % |
|-------|-----------|---------|--------|---------|----------|
| 1     | 53.377    | 64936   | 808    | 2.149   | 2.450    |
| 2     | 58.150    | 2956179 | 32179  | 97.851  | 97.550   |
| Total |           | 3021114 | 32987  | 100.000 | 100.000  |

Compound **3h**, racemic (254 nm)

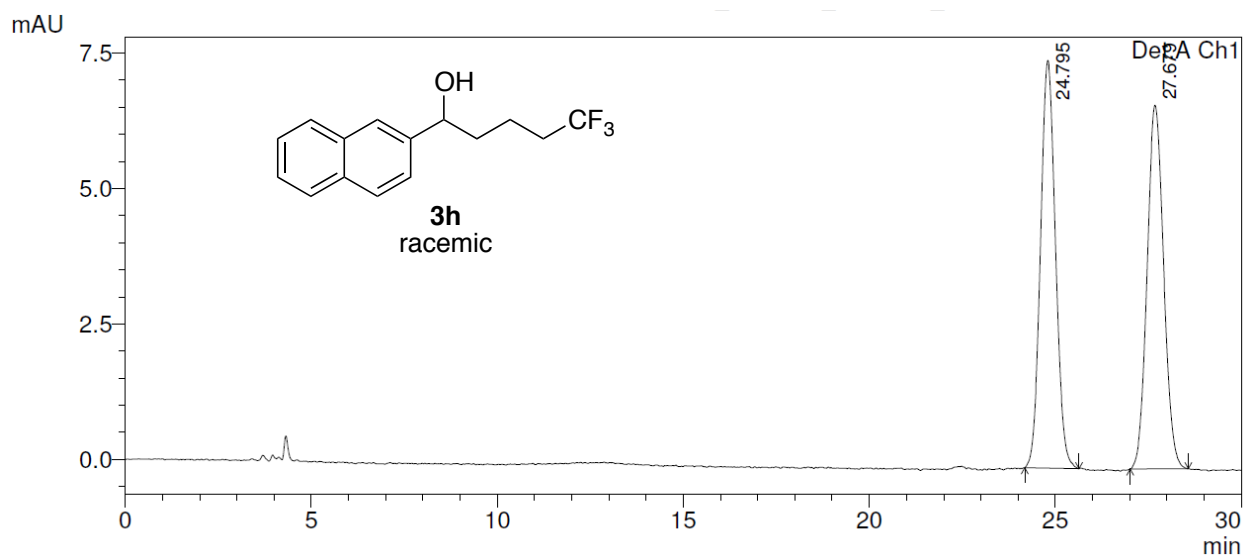

| Peak# | Ret. Time | Area   | Height | Area %  | Height % |
|-------|-----------|--------|--------|---------|----------|
| 1     | 24.795    | 210483 | 7521   | 50.324  | 52.855   |
| 2     | 27.679    | 207772 | 6708   | 49.676  | 47.145   |
| Total |           | 418255 | 14229  | 100.000 | 100.000  |

Compound **3h**, 96% ee (254 nm)

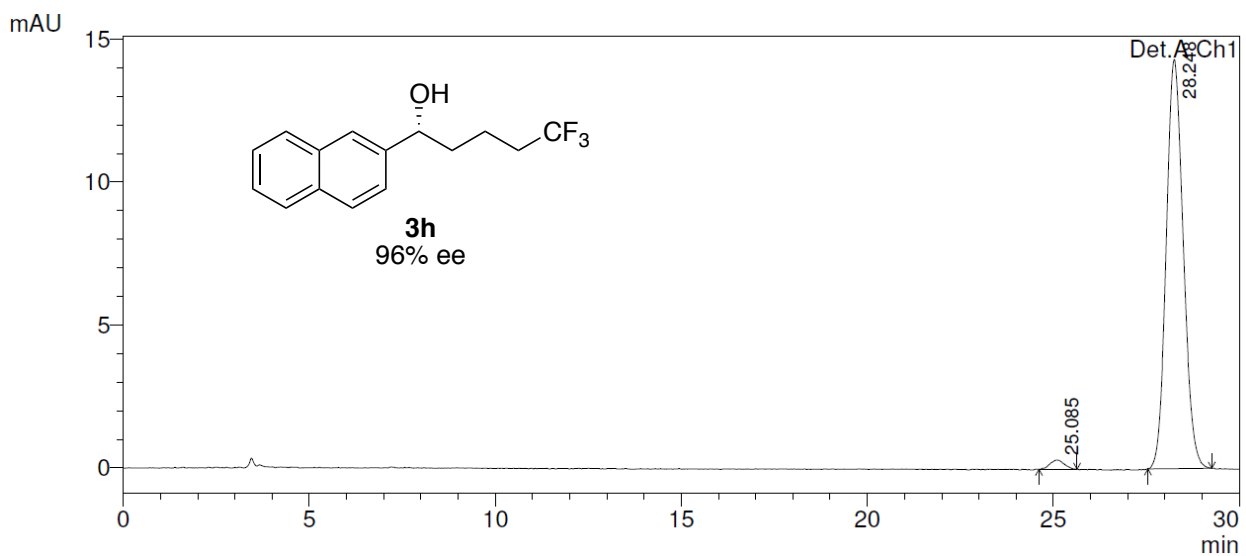

| Peak# | Ret. Time | Area   | Height | Area %  | Height % |
|-------|-----------|--------|--------|---------|----------|
| 1     | 25.085    | 8553   | 324    | 1.840   | 2.212    |
| 2     | 28.248    | 456259 | 14308  | 98.160  | 97.788   |
| Total |           | 464812 | 14632  | 100.000 | 100.000  |

Compound **3i**, racemic (254 nm)

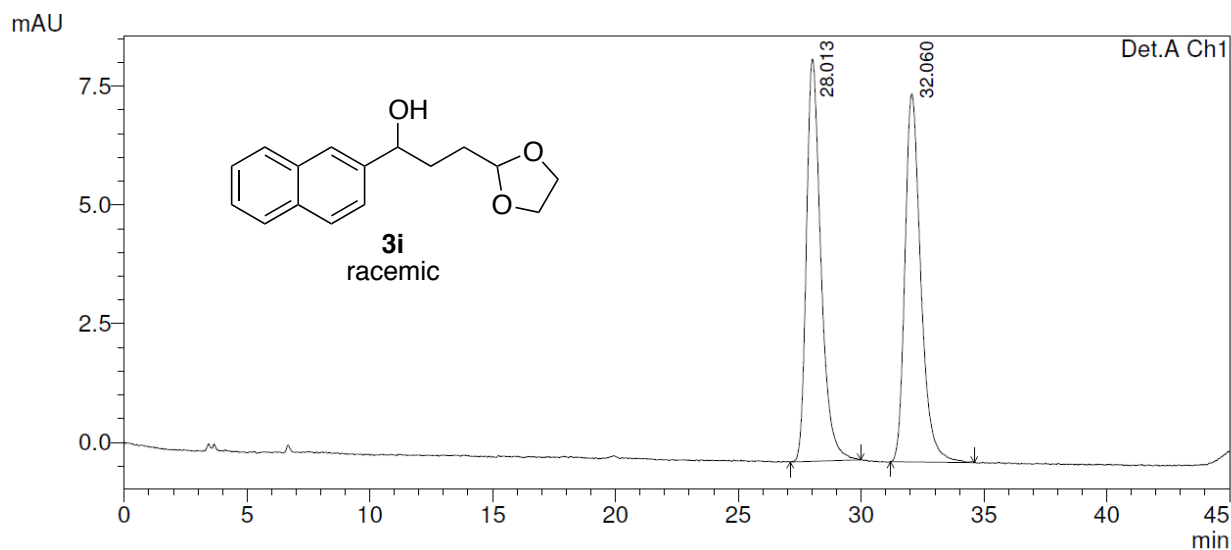

| Peak# | Ret. Time | Area   | Height | Area %  | Height % |
|-------|-----------|--------|--------|---------|----------|
| 1     | 28.013    | 346583 | 8466   | 49.977  | 52.224   |
| 2     | 32.060    | 346898 | 7745   | 50.023  | 47.776   |
| Total |           | 693481 | 16211  | 100.000 | 100.000  |

Compound **3i**, 98% ee (254 nm)

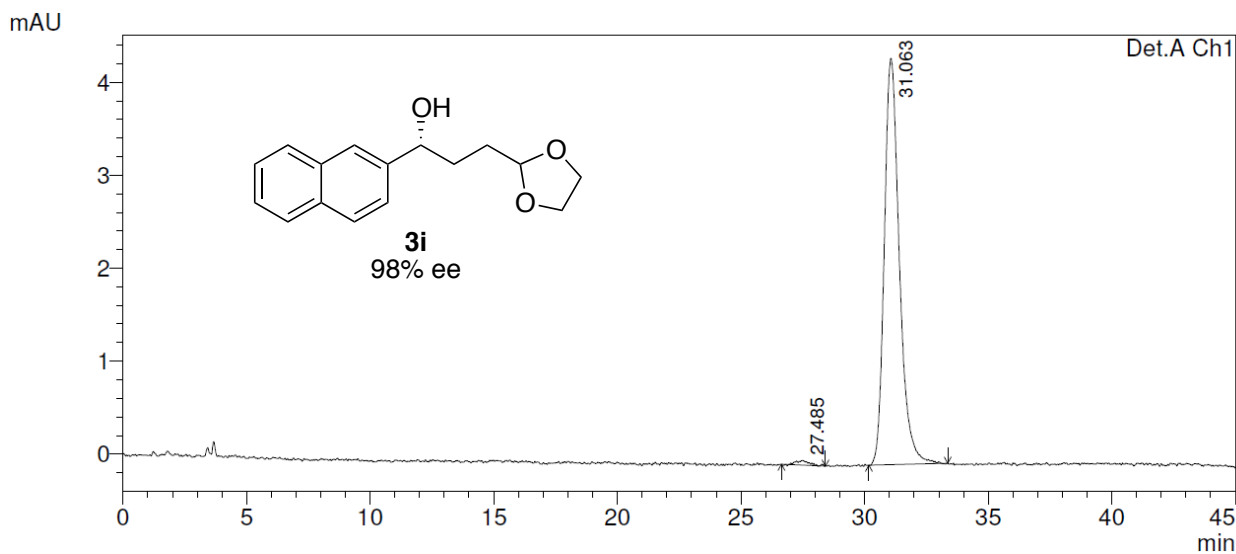

| Peak# | Ret. Time | Area   | Height | Area %  | Height % |
|-------|-----------|--------|--------|---------|----------|
| 1     | 27.485    | 1806   | 53     | 0.968   | 1.191    |
| 2     | 31.063    | 184751 | 4374   | 99.032  | 98.809   |
| Total |           | 186557 | 4426   | 100.000 | 100.000  |



Compound **3j**, racemic (254 nm)

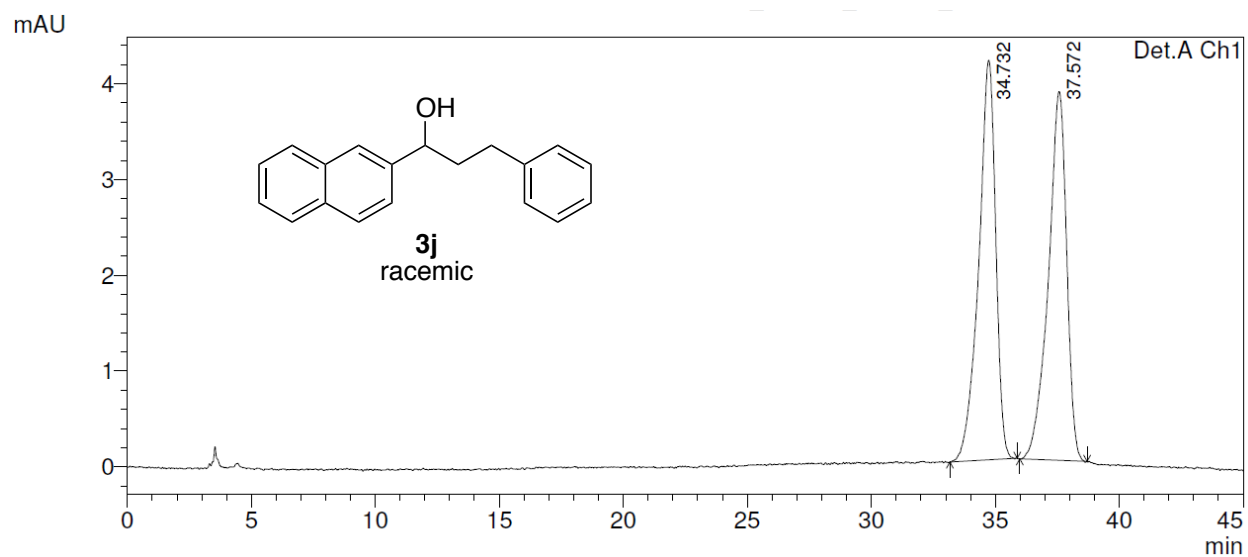

| Peak# | Ret. Time | Area   | Height | Area %  | Height % |
|-------|-----------|--------|--------|---------|----------|
| 1     | 34.732    | 198596 | 4170   | 50.141  | 51.978   |
| 2     | 37.572    | 197482 | 3853   | 49.859  | 48.022   |
| Total |           | 396078 | 8023   | 100.000 | 100.000  |

Compound **3j**, 98% ee (254 nm)

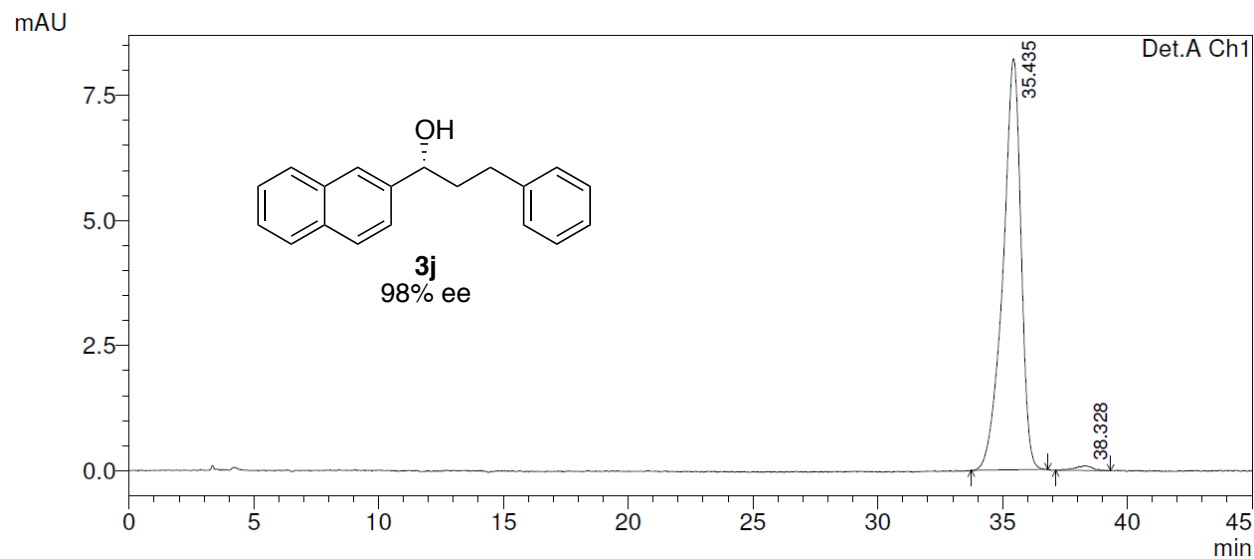

| Peak# | Ret. Time | Area   | Height | Area %  | Height % |
|-------|-----------|--------|--------|---------|----------|
| 1     | 35.435    | 412336 | 8222   | 98.853  | 98.861   |
| 2     | 38.328    | 4783   | 95     | 1.147   | 1.139    |
| Total |           | 417119 | 8317   | 100.000 | 100.000  |

Compound **3k**, racemic (254 nm)

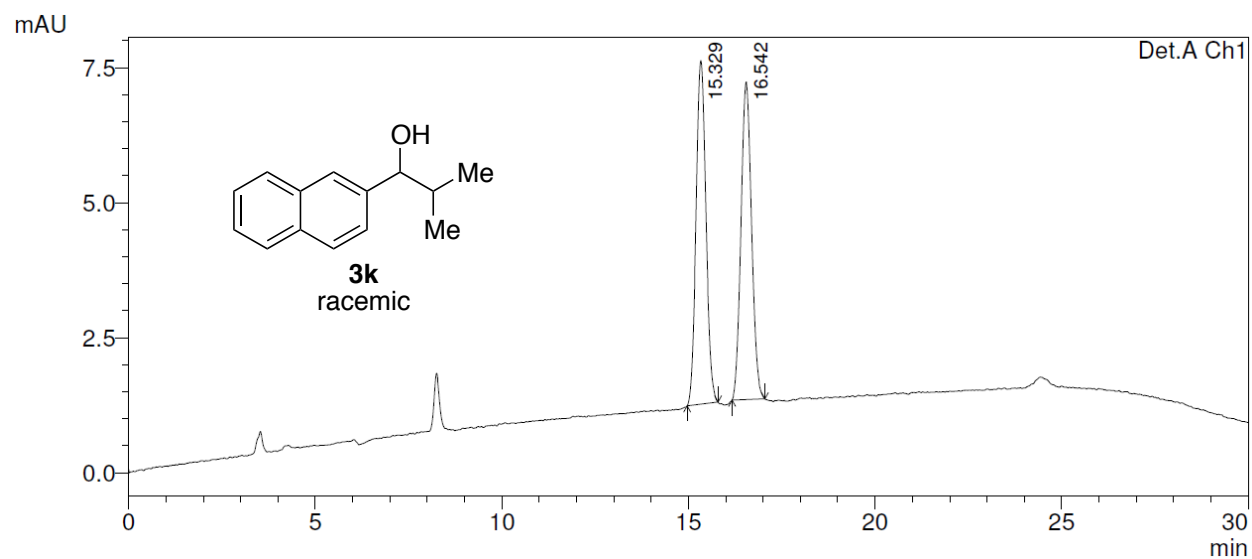

| Peak# | Ret. Time | Area   | Height | Area %  | Height % |
|-------|-----------|--------|--------|---------|----------|
| 1     | 15.329    | 116684 | 6363   | 50.105  | 51.956   |
| 2     | 16.542    | 116193 | 5884   | 49.895  | 48.044   |
| Total |           | 232877 | 12246  | 100.000 | 100.000  |

Compound **3k**, 98% ee (254 nm)

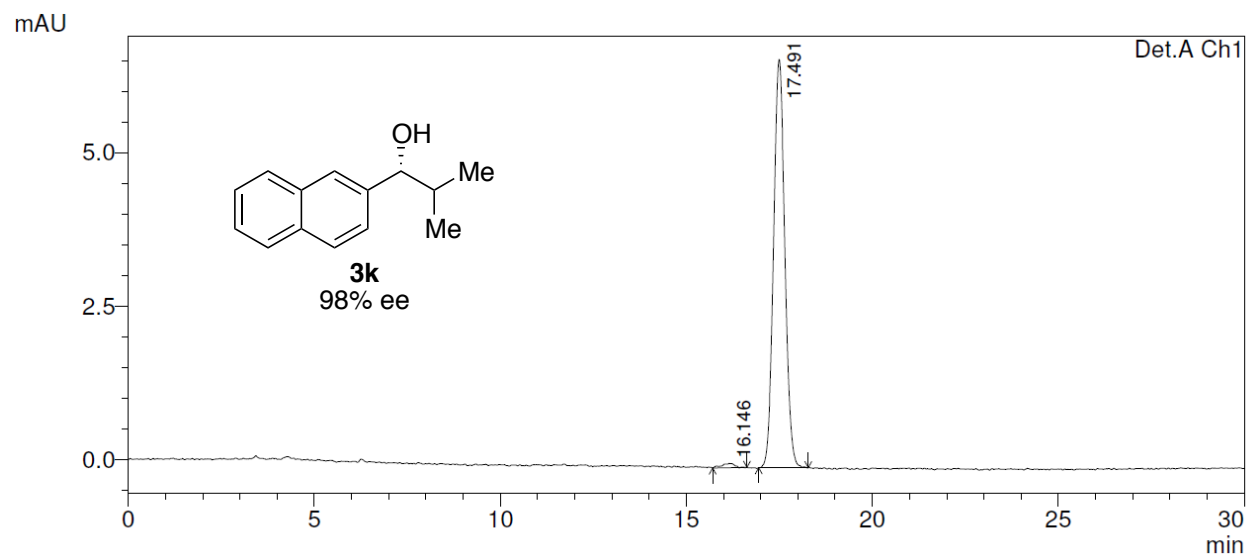

| Peak# | Ret. Time | Area   | Height | Area %  | Height % |
|-------|-----------|--------|--------|---------|----------|
| 1     | 16.146    | 1594   | 70     | 1.126   | 1.034    |
| 2     | 17.491    | 140016 | 6657   | 98.874  | 98.966   |
| Total |           | 141610 | 6726   | 100.000 | 100.000  |

Compound **3a**, racemic (254 nm)



| Peak# | Ret. Time | Area   | Height | Area %  | Height % |
|-------|-----------|--------|--------|---------|----------|
| 1     | 45.172    | 64627  | 1174   | 50.417  | 51.245   |
| 2     | 47.381    | 63558  | 1117   | 49.583  | 48.755   |
| Total |           | 128185 | 2292   | 100.000 | 100.000  |

Compound **3a**, 95% ee (254 nm)

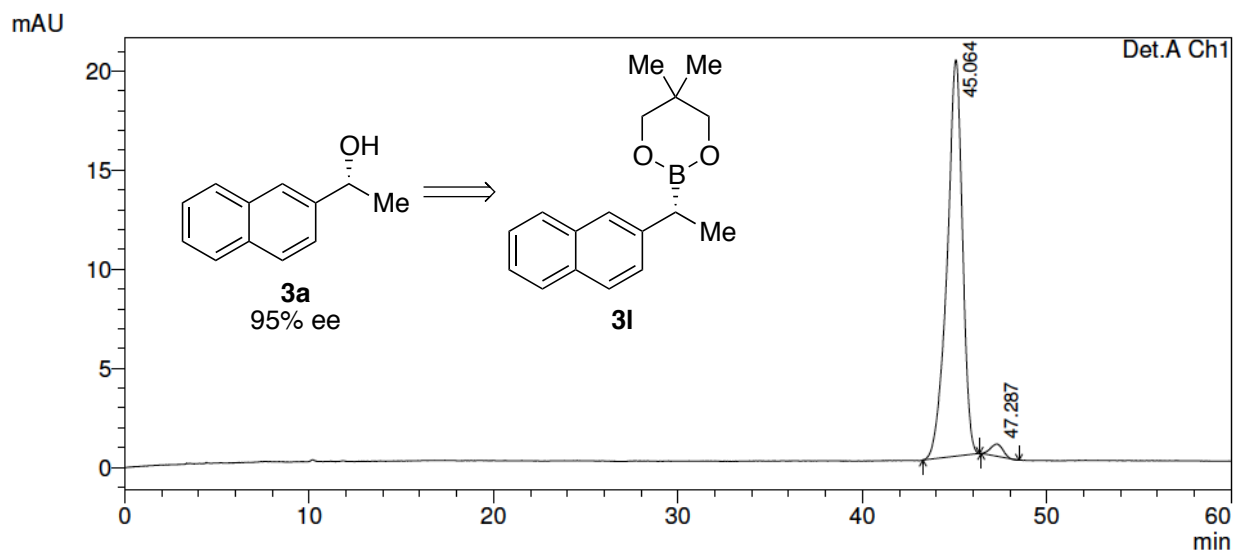

| Peak# | Ret. Time | Area    | Height | Area %  | Height % |
|-------|-----------|---------|--------|---------|----------|
| 1     | 45.064    | 1159668 | 20005  | 97.571  | 97.019   |
| 2     | 47.287    | 28864   | 615    | 2.429   | 2.981    |
| Total |           | 1188532 | 20620  | 100.000 | 100.000  |

Compound **3a**, racemic (254 nm)



| Peak# | Ret. Time | Area   | Height | Area %  | Height % |
|-------|-----------|--------|--------|---------|----------|
| 1     | 45.172    | 64627  | 1174   | 50.417  | 51.245   |
| 2     | 47.381    | 63558  | 1117   | 49.583  | 48.755   |
| Total |           | 128185 | 2292   | 100.000 | 100.000  |

Compound **3a**, 95% ee (254 nm)

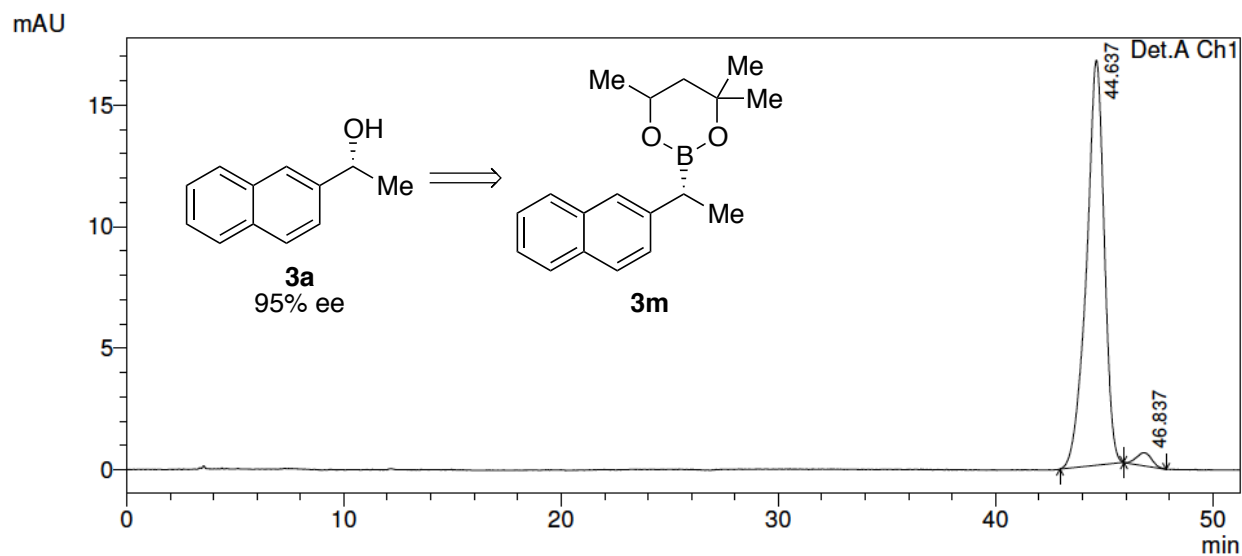

| Peak# | Ret. Time | Area   | Height | Area %  | Height % |
|-------|-----------|--------|--------|---------|----------|
| 1     | 44.637    | 946536 | 16673  | 97.303  | 96.868   |
| 2     | 46.837    | 26234  | 539    | 2.697   | 3.132    |
| Total |           | 972770 | 17212  | 100.000 | 100.000  |

Compound **3n**, racemic (254 nm)

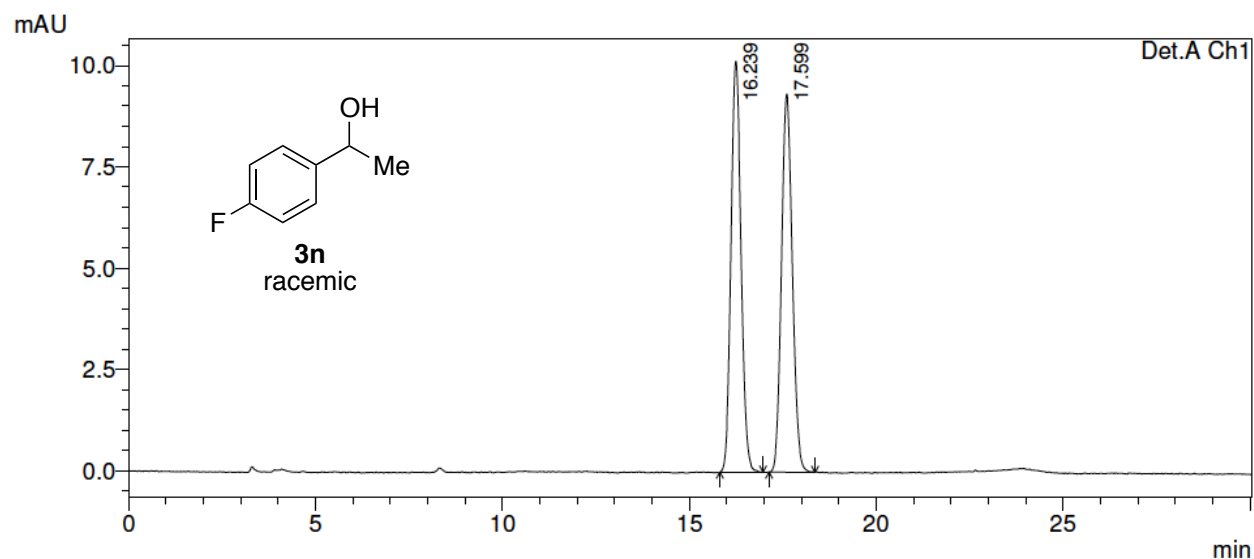

| Peak# | Ret. Time | Area   | Height | Area %  | Height % |
|-------|-----------|--------|--------|---------|----------|
| 1     | 16.239    | 189291 | 10142  | 50.049  | 52.077   |
| 2     | 17.599    | 188917 | 9333   | 49.951  | 47.923   |
| Total |           | 378208 | 19476  | 100.000 | 100.000  |

Compound **3n**, 85% ee (254 nm)

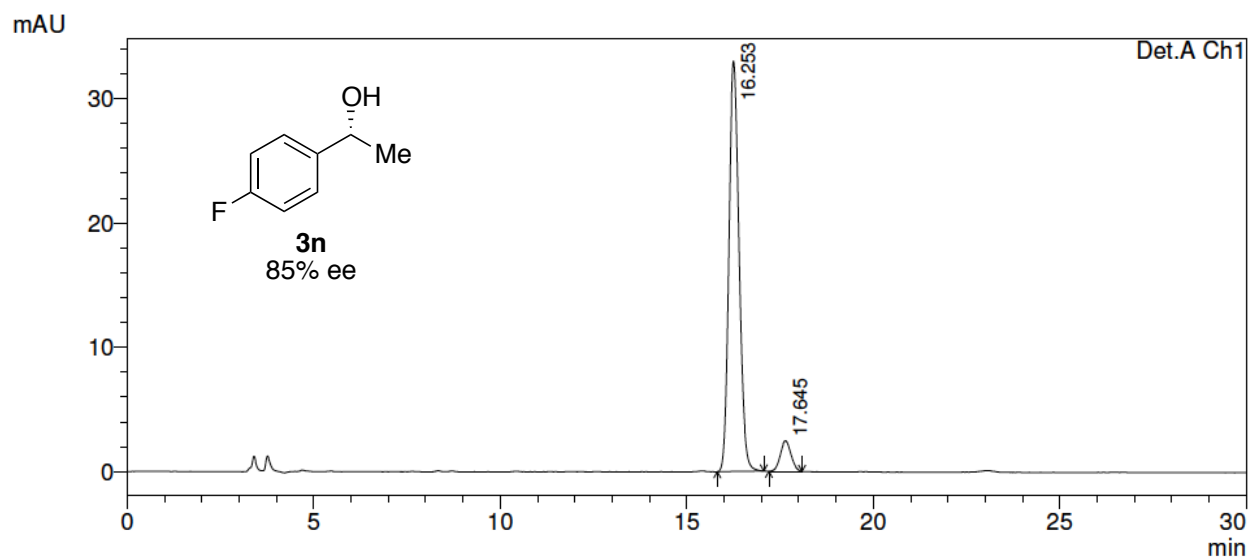

| Peak# | Ret. Time | Area   | Height | Area %  | Height % |
|-------|-----------|--------|--------|---------|----------|
| 1     | 16.253    | 625785 | 33025  | 92.796  | 93.094   |
| 2     | 17.645    | 48585  | 2450   | 7.204   | 6.906    |
| Total |           | 674370 | 35475  | 100.000 | 100.000  |

Compound **3o**, racemic (254 nm)

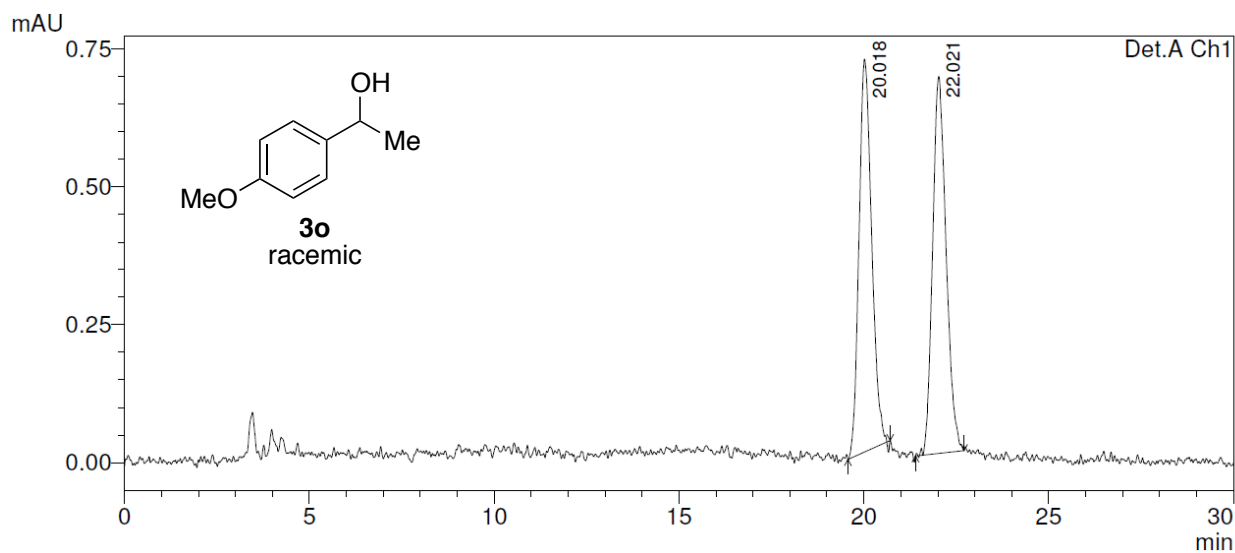

| Peak# | Ret. Time | Area  | Height | Area %  | Height % |
|-------|-----------|-------|--------|---------|----------|
| 1     | 20.018    | 16955 | 713    | 49.424  | 51.024   |
| 2     | 22.021    | 17351 | 684    | 50.576  | 48.976   |
| Total |           | 34306 | 1397   | 100.000 | 100.000  |

Compound **3o**, 87% ee (254 nm)

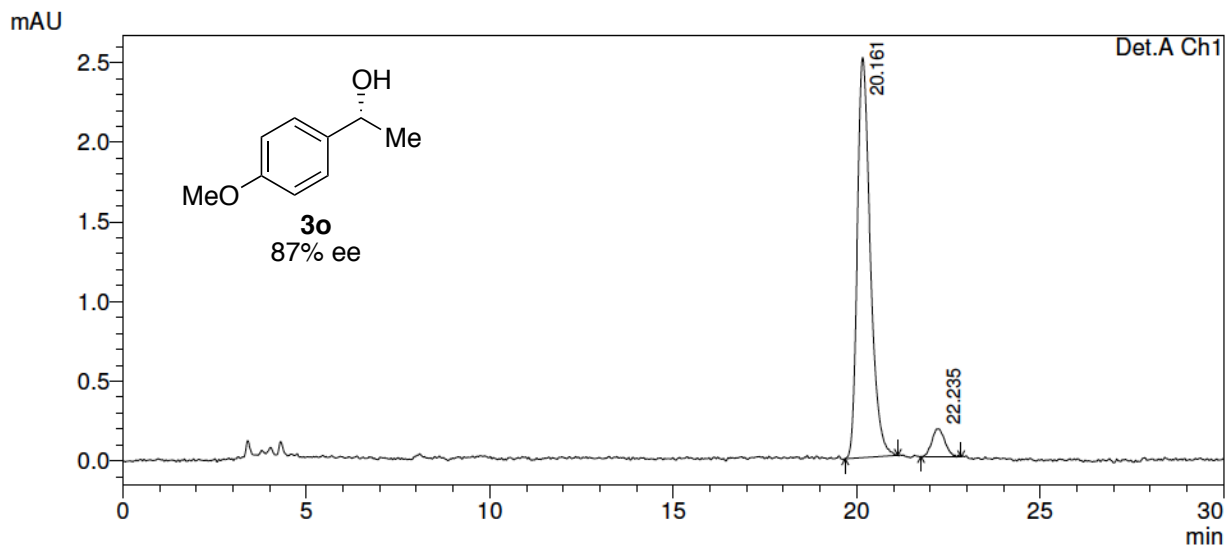

| Peak# | Ret. Time | Area  | Height | Area %  | Height % |
|-------|-----------|-------|--------|---------|----------|
| 1     | 20.161    | 61611 | 2512   | 93.425  | 93.488   |
| 2     | 22.235    | 4336  | 175    | 6.575   | 6.512    |
| Total |           | 65947 | 2687   | 100.000 | 100.000  |

Compound **3p**, racemic (210 nm)

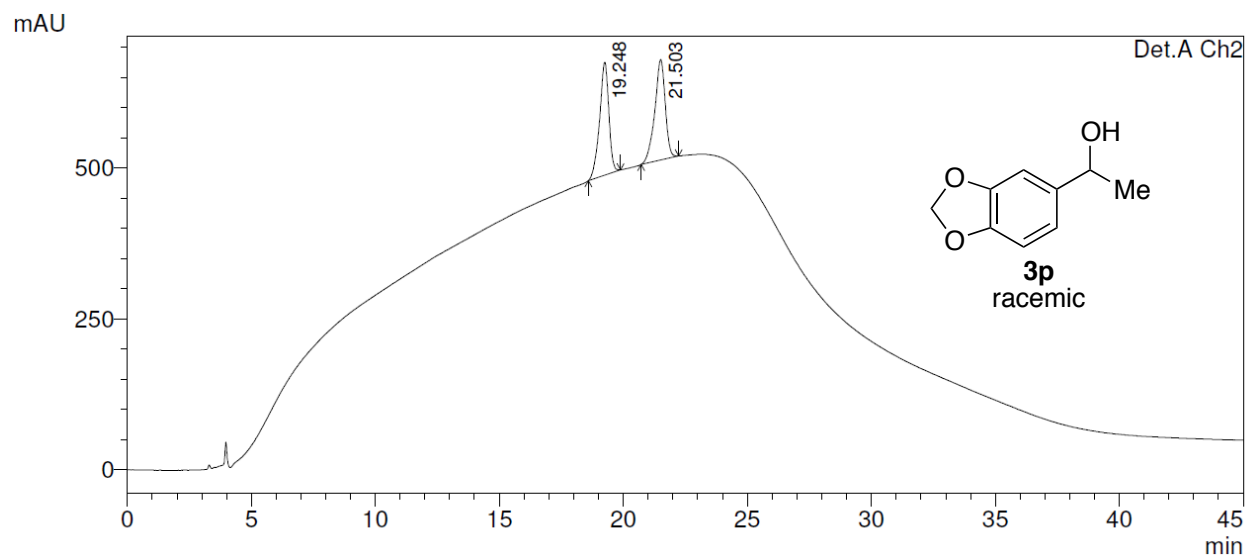

| Peak# | Ret. Time | Area    | Height | Area %  | Height % |
|-------|-----------|---------|--------|---------|----------|
| 1     | 19.248    | 4853386 | 187177 | 49.816  | 52.913   |
| 2     | 21.503    | 4889175 | 166570 | 50.184  | 47.087   |
| Total |           | 9742560 | 353746 | 100.000 | 100.000  |

Compound **3p**, 85% ee (210 nm)

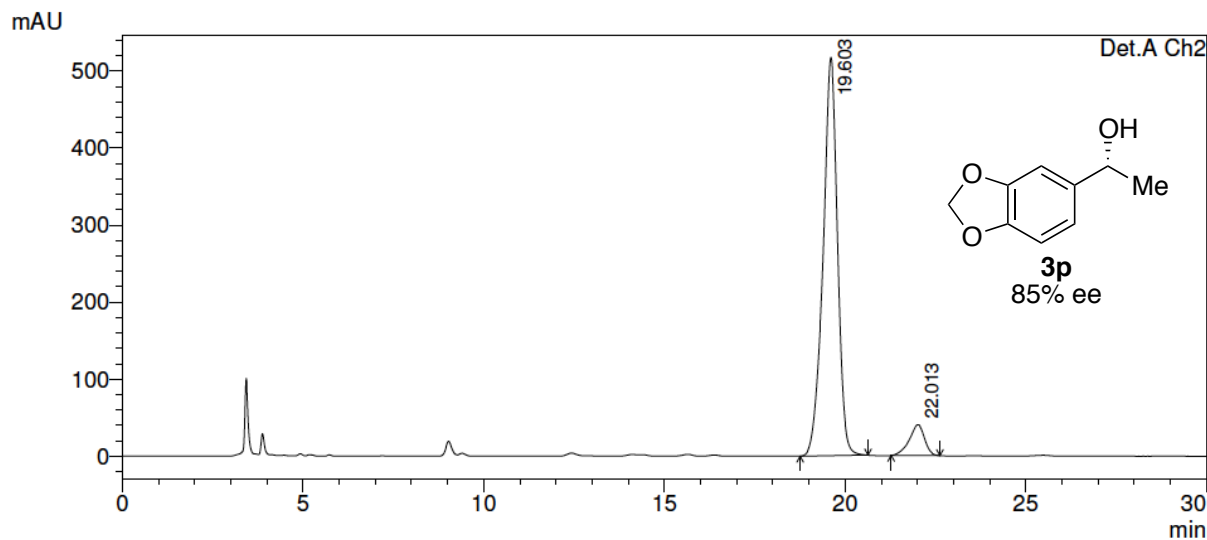

| Peak# | Ret. Time | Area     | Height | Area %  | Height % |
|-------|-----------|----------|--------|---------|----------|
| 1     | 19.603    | 14324275 | 516565 | 92.465  | 92.804   |
| 2     | 22.013    | 1167262  | 40056  | 7.535   | 7.196    |
| Total |           | 15491537 | 556621 | 100.000 | 100.000  |

Compound **3c**, racemic (254 nm)

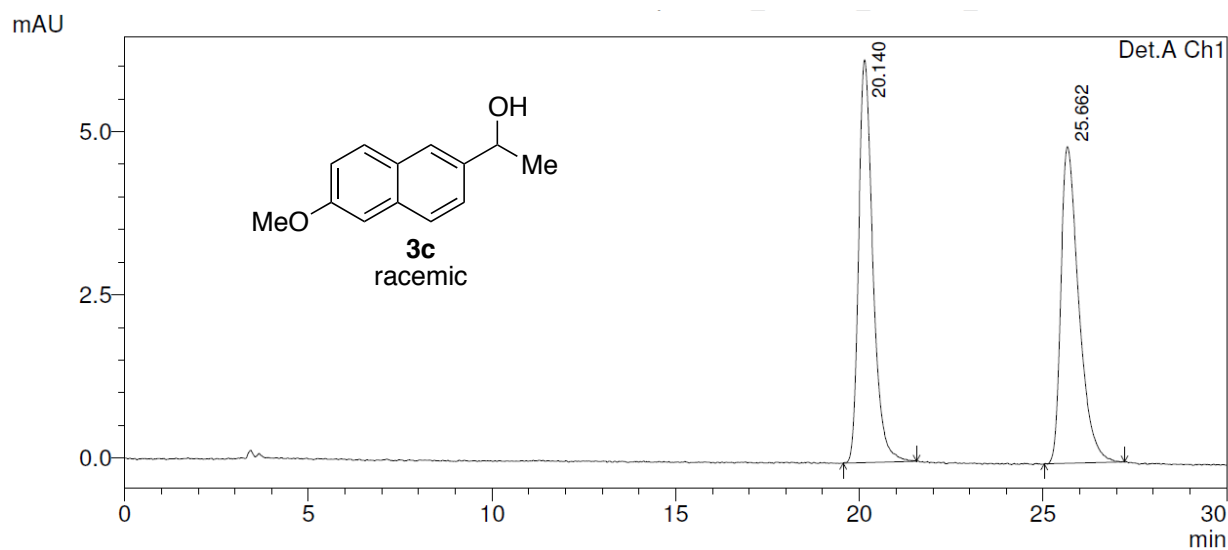

| Peak# | Ret. Time | Area   | Height | Area %  | Height % |
|-------|-----------|--------|--------|---------|----------|
| 1     | 20.140    | 165137 | 6165   | 50.153  | 55.982   |
| 2     | 25.662    | 164128 | 4848   | 49.847  | 44.018   |
| Total |           | 329266 | 11013  | 100.000 | 100.000  |

Compound **3c**, 99% ee (254 nm)

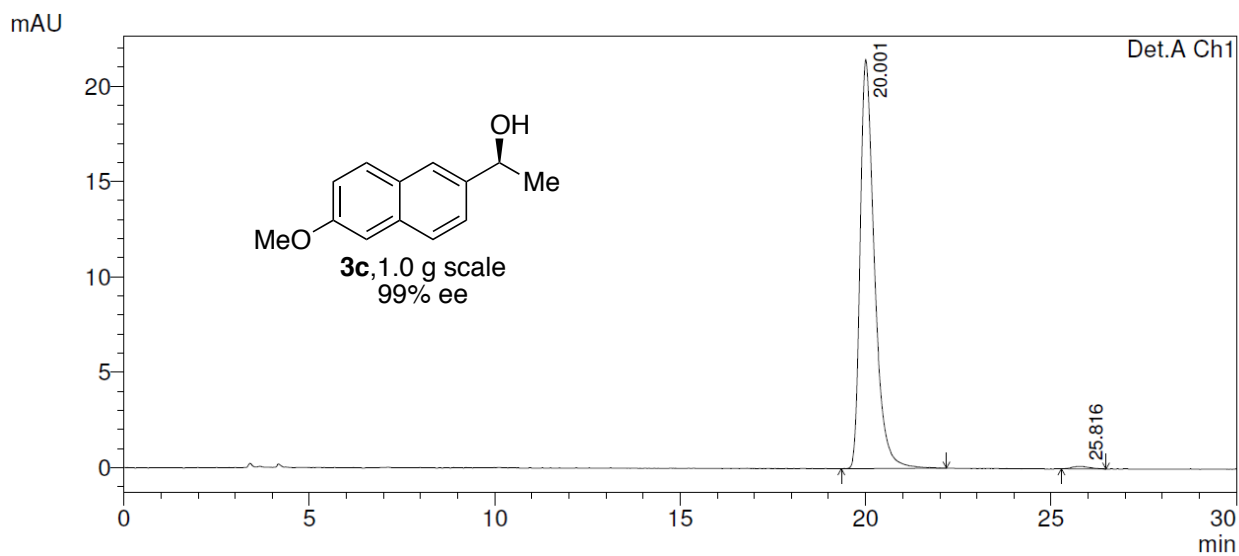

| Peak# | Ret. Time | Area   | Height | Area %  | Height % |
|-------|-----------|--------|--------|---------|----------|
| 1     | 20.001    | 574869 | 21457  | 99.271  | 99.399   |
| 2     | 25.816    | 4222   | 130    | 0.729   | 0.601    |
| Total |           | 579091 | 21587  | 100.000 | 100.000  |
